# Supplementary material for: Expeditious access tocis-β-aryl, γ-alkyl disubstituted (±)-γ-butyrolactonesvianickel-hydride catalysis
Source: Royal Society of Chemistry journal article supplement (doi:10.1039/d3ob00895a), 2023-01-01
Supplement: d3ob00895a1.pdf [file d3ob00895a1.pdf]

## Supporting Information for

Expeditious access to *cis*- $\beta$ -aryl,  $\gamma$ -alkyl disubstituted  
( $\pm$ )- $\gamma$ -butyrolactones *via* Nickel-hydride catalysis

**O. Stephen Ojo\***, **Hannah J. Steel** and **Haralampos N. Miras**

WestCHEM, School of Chemistry, The Joseph Black Building, University of Glasgow,  
Glasgow, G12 8QQ, United Kingdom.

\*Corresponding author

Telephone: +44 (0)141 330 6334

Email: [Oluwarotimi.Ojo@glasgow.ac.uk](mailto:Oluwarotimi.Ojo@glasgow.ac.uk)

## **General Methods**

All reagents and starting materials were obtained from commercial sources and used as received. All solvents were analytical grade and used as purchased. Reactions were performed under nitrogen atmosphere, using a balloon filled with nitrogen. All reactions performed at elevated temperatures were heated using laboratory heating blocks. Brine refers to a saturated aqueous solution of sodium chloride. Flash column chromatography was performed using silica gel 60Å (35–70 µm). Merck Kieselgel aluminium-backed plates precoated with silica gel 60Å F254 were used for thin-layer chromatography (TLC) and were visualised by ultraviolet light (254 nm) and/or heating the plate after staining with vanillin or potassium permanganate (KMnO<sub>4</sub>). The <sup>1</sup>H NMR spectra were recorded on Bruker Avance III HD 500 (500 MHz) or Avance III HD 400 (400 MHz) ultrashield™ spectrometers and data are reported as follows: chemical shift (δ<sub>H</sub>) in ppm relative to tetramethylsilane as the internal standard (CDCl<sub>3</sub>, δ 7.26 ppm; DMSO-*d*<sub>6</sub> δ 2.50 ppm), multiplicity (s = singlet, d = doublet, t = triplet, q = quartet, m = multiplet or overlap of non-equivalent resonances), and integration. The <sup>13</sup>C NMR spectra were recorded on a NMR spectrometer at either 101 or 126 MHz and data are reported as follows: chemical shift (δ<sub>C</sub>) in ppm relative to tetramethylsilane or the solvent as an internal standard (CDCl<sub>3</sub>, δ 77.16 ppm; DMSO-*d*<sub>6</sub> δ 39.5 ppm). The multiplicity of each carbon with respect to hydrogen was deduced from DEPT (Distortionless Enhancement by Polarization Transfer) 135 experiments, which determined whether they are C, CH, CH<sub>2</sub>, or CH<sub>3</sub>. All the <sup>13</sup>C and <sup>19</sup>F NMR were ran and reported as hydrogen decoupled. The infrared spectra were recorded on a Perkin Elmer FT-IR spectrometer using neat samples; Wavelengths of maximum absorbance (ν<sub>max</sub>) are quoted in wavenumbers (cm<sup>-1</sup>). Only selected, characteristic IR absorption data are provided for each compound. The mass spectra were recorded using electron impact or electrospray techniques. The High-resolution mass spectra (HRMS) were recorded by the University of Glasgow school of chemistry mass spectrometry service on Agilent 6546 LC/Q-TOF using electrospray ionisation (ESI). The parent ion [M]<sup>+</sup>, [M+H]<sup>+</sup> or [M+Na]<sup>+</sup> is calculated to 4 decimal places from the molecular formula, and all values are within a tolerance of 5 ppm. Melting points were measured on Büchi melting point B-545 apparatus and are uncorrected.

### Synthesis of Alkynoates ( $\pm$ )-S1-S9

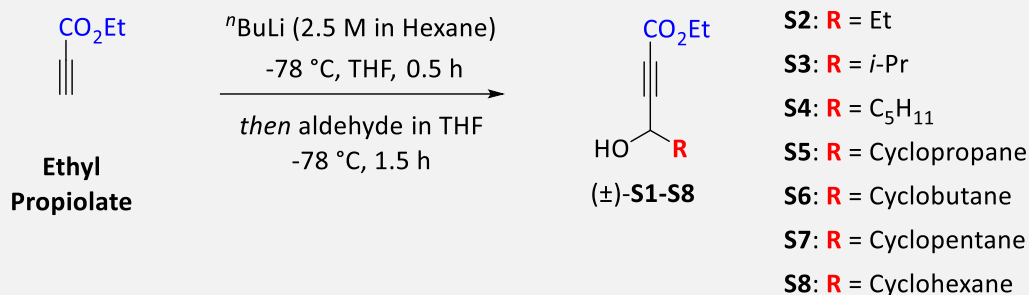

#### General experimental procedure for the synthesis of alkynoates ( $\pm$ )-S1-S8:

*n*BuLi (2.5 M in Hexanes, 36.69 mmol, 14.68 mL, 1.2 eq.) was added to a cooled stirring solution of ethyl propiolate (3.0 g, 30.58 mmol, 1.0 eq.) in THF (200 mL) at -78 °C in a pre-flame dried 500 mL round bottom flask under the inert atmosphere of nitrogen. The resulting light-yellow solution was stirred at -78 °C for 30 minutes. Afterwards, a solution of the corresponding aldehyde (14.68 mmol, 1.2 eq.) in THF (30 mL) was added, slowly, at -78 °C. The resulting mixture was stirred at -78 °C for 1.5 h, the cooling bath was removed, and the mixture was poured into a separating funnel which contains saturated aqueous solution of ammonium chloride (100 mL). The aqueous layer was extracted with EtOAc (60 mL). The combined organic layers were washed with brine (70 mL), dried with MgSO<sub>4</sub>, filtered, and solvent removed *in vacuo*. Purification by silica gel chromatography using 5-20% EtOAc in hexanes furnished the alkynoates.

#### Ethyl 4-hydroxy-2-pentynoate ( $\pm$ )-S1

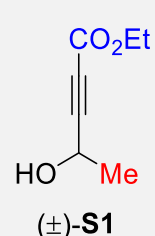

The general procedure for the synthesis of alkynoates was followed as described using *n*BuLi (2.5 M in Hexanes, 36.69 mmol, 14.68 mL, 1.2 eq.), ethyl propiolate (3.0 g, 30.58 mmol, 1.0 eq.) in THF (200 mL) and acetaldehyde (0.65 g, 14.68 mmol, 1.2 eq.) in THF (30 mL). Compound ( $\pm$ )-S1 was obtained as colourless oil (2.96 g, 20.79 mmol, 68% yield). **<sup>1</sup>H NMR** (400 MHz, CDCl<sub>3</sub>)  $\delta$  4.63 (qd, *J* = 6.7, 5.6 Hz, 1H), 4.23 (q, *J* = 7.1 Hz, 2H), 2.48 (d, *J* = 5.6 Hz, 1H, OH), 1.50 (d, *J* = 6.7 Hz, 3H), 1.30 (t, *J* = 7.2 Hz, 3H). **<sup>13</sup>C NMR** (101 MHz, CDCl<sub>3</sub>)  $\delta$  153.5, 88.4, 75.9, 62.3, 58.1, 23.4, 14.1. The data obtained agrees with literature data.<sup>1a</sup>

### Ethyl 4-hydroxy-2-hexynoate ( $\pm$ )-**S2**

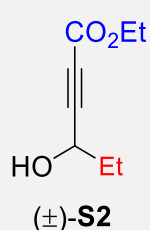

The general procedure for the synthesis of alkynoates was followed as described using *n*BuLi (2.5 M in Hexanes, 36.69 mmol, 14.68 mL, 1.2 eq.), ethyl propiolate (3.0 g, 30.58 mmol, 1.0 eq.) in THF (200 mL) and propionaldehyde (0.85 g, 14.68 mmol, 1.2 eq.) in THF (30 mL). Compound ( $\pm$ )-**S2** was obtained as light-yellow oil (3.39 g, 21.71 mmol, 71% yield). **<sup>1</sup>H NMR**

(400 MHz, CDCl<sub>3</sub>)  $\delta$  4.44 (q,  $J$  = 6.3 Hz, 1H), 4.24 (q,  $J$  = 7.1 Hz, 2H), 1.97 (d,  $J$  = 5.9 Hz, 1H, OH), 1.80 (qd,  $J$  = 7.4, 6.4 Hz, 2H), 1.31 (t,  $J$  = 7.1 Hz, 3H), 1.04 (t,  $J$  = 7.4 Hz, 3H). **<sup>13</sup>C NMR** (101 MHz, CDCl<sub>3</sub>)  $\delta$  153.5, 87.6, 76.7, 63.4, 62.3, 30.1, 14.1, 9.4. The data obtained agrees with literature data.<sup>1b</sup>

### Ethyl 4-hydroxy-5-methyl-2-hexynoate ( $\pm$ )-**S3**

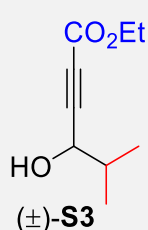

The general procedure for the synthesis of alkynoates was followed as described using *n*BuLi (2.5 M in Hexanes, 36.69 mmol, 14.68 mL, 1.2 eq.), ethyl propiolate (3.0 g, 30.58 mmol, 1.0 eq.) in THF (200 mL) and isobutyraldehyde (1.06 g, 14.68 mmol, 1.2 eq.) in THF (30 mL). Compound ( $\pm$ )-**S3** was obtained as light-red oil (3.75 g, 22.02 mmol, 72% yield). **<sup>1</sup>H NMR**

(400 MHz, CDCl<sub>3</sub>)  $\delta$  4.28 (t,  $J$  = 5.9 Hz, 1H), 4.24 (q,  $J$  = 7.2 Hz, 2H), 2.05 (br s, 1H, OH), 1.96 (pd,  $J$  = 6.8, 5.7 Hz, 1H), 1.31 (t,  $J$  = 7.1 Hz, 3H), 1.03 (t,  $J$  = 6.9 Hz, 6H). **<sup>13</sup>C NMR** (101 MHz, CDCl<sub>3</sub>)  $\delta$  153.5, 86.8, 77.5, 67.7, 62.2, 34.3, 18.0, 17.6, 14.1. The data obtained agrees with literature data.<sup>2a</sup>

### Ethyl 4-hydroxy-2-nonynoate ( $\pm$ )-**S4**

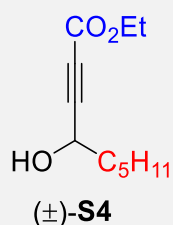

The general procedure for the synthesis of alkynoates was followed as described using *n*BuLi (2.5 M in Hexanes, 36.69 mmol, 14.68 mL, 1.2 eq.), ethyl propiolate (3.0 g, 30.58 mmol, 1.0 eq.) in THF (200 mL) and hexanal (1.47 g, 14.68 mmol, 1.2 eq.) in THF (30 mL). Compound ( $\pm$ )-**S4** was

obtained as colourless oil (4.60 g, 23.24 mmol, 76% yield). **<sup>1</sup>H NMR** (400 MHz, CDCl<sub>3</sub>)  $\delta$  4.48 (td,  $J$  = 6.6, 5.8 Hz, 1H), 4.24 (q,  $J$  = 7.1 Hz, 2H), 2.01 (d,  $J$  = 5.9 Hz, 1H, OH), 1.72-1.80 (m, 2H), 1.42-1.52 (m, 2H), 1.28-1.35 (m, 7H), 0.85-0.93 (m, 3H). **<sup>13</sup>C NMR** (101 MHz, CDCl<sub>3</sub>)  $\delta$  153.5, 87.8, 76.7, 62.3, 62.2, 37.0, 31.4, 24.7, 22.6, 14.14, 14.10. The data obtained agrees with literature data.<sup>2b</sup>

### Ethyl 4-cyclopropyl-4-hydroxy-2-butynoate ( $\pm$ )-**S5**

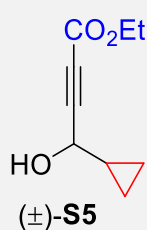

The general procedure for the synthesis of alkynoates was followed as described using *n*BuLi (2.5 M in Hexanes, 36.69 mmol, 14.68 mL, 1.2 eq.), ethyl propiolate (3.0 g, 30.58 mmol, 1.0 eq.) in THF (200 mL) and cyclopropanecarboxyaldehyde (1.02 g, 14.68 mmol, 1.2 eq.) in THF (30 mL).

Compound ( $\pm$ )-**S5** was obtained as light-red oil (3.08 g, 18.35 mmol, 60% yield). **<sup>1</sup>H NMR** (400 MHz, CDCl<sub>3</sub>)  $\delta$  4.18-4.28 (m, 3H), 2.16 (d, *J* = 6.3 Hz, 1H, QH), 1.26-1.35 (m, 4H), 0.55-0.68 (m, 2H), 0.43-0.52 (m, 2H). **<sup>13</sup>C NMR** (101 MHz, CDCl<sub>3</sub>)  $\delta$  153.4, 85.9, 76.6, 65.6, 62.3, 16.8, 14.1, 3.5, 2.0. **IR** (neat)  $\nu_{\max}$  (cm<sup>-1</sup>): 3399, 2234, 1708, 1242. **HRMS** (ESI): calc for C<sub>9</sub>H<sub>12</sub>O<sub>3</sub> *m/z*: 168.0786 found [M+H]<sup>+</sup> 169.0860.

### Ethyl 4-cyclobutyl-4-hydroxy-2-butynoate ( $\pm$ )-**S6**

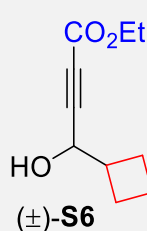

The general procedure for the synthesis of alkynoates was followed as described using *n*BuLi (2.5 M in Hexanes, 36.69 mmol, 14.68 mL, 1.2 eq.), ethyl propiolate (3.0 g, 30.58 mmol, 1.0 eq.) in THF (200 mL) and cyclobutanecarboxyaldehyde (1.23 g, 14.68 mmol, 1.2 eq.) in THF (30 mL).

Compound ( $\pm$ )-**S6** was obtained as light-brown oil (3.06 g, 16.82 mmol, 55% yield). **<sup>1</sup>H NMR** (400 MHz, CDCl<sub>3</sub>)  $\delta$  4.42 (dd, *J* = 7.1, 6.1 Hz, 1H), 4.24 (q, *J* = 7.1 Hz, 2H), 2.58-2.70 (m, 1H), 2.01-2.14 (m, 2H), 1.99 (d, *J* = 6.2 Hz, 1H, QH), 1.90-1.97 (m, 3H), 1.83-1.89 (m, 1H), 1.31 (t, *J* = 7.1 Hz, 3H). **<sup>13</sup>C NMR** (101 MHz, CDCl<sub>3</sub>)  $\delta$  153.5, 86.7, 77.0, 65.7, 62.3, 40.2, 24.1, 23.5, 17.8, 14.1. **IR** (neat)  $\nu_{\max}$  (cm<sup>-1</sup>): 3398, 2235, 1709, 1245. **HRMS** (ESI): calc for C<sub>10</sub>H<sub>14</sub>O<sub>3</sub> *m/z*: 182.0943 found [M+H]<sup>+</sup> 183.1017.

### Ethyl 4-cyclopentyl-4-hydroxy-2-butynoate (±)-**S7**

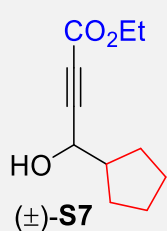

The general procedure for the synthesis of alkynoates was followed as described using *n*BuLi (2.5 M in Hexanes, 36.69 mmol, 14.68 mL, 1.2 eq.), ethyl propiolate (3.0 g, 30.58 mmol, 1.0 eq.) in THF (200 mL) and cyclopentanecarboxyaldehyde (1.44 g, 14.68 mmol, 1.2 eq.) in THF (30 mL). Compound (±)-**S7** was obtained as colourless oil (3.60 g, 18.35 mmol, 60% yield). **<sup>1</sup>H NMR** (400 MHz, CDCl<sub>3</sub>) δ 4.34 (dd, *J* = 7.2, 6.0 Hz, 1H), 4.23 (q, *J* = 7.1 Hz, 2H), 2.24 (h, *J* = 7.9 Hz, 1H), 2.01 (d, *J* = 6.1 Hz, 1H, OH), 1.75-1.87 (m, 2H), 1.60-1.69 (m, 2H), 1.53-1.59 (m, 2H), 1.39-1.51 (m, 2H), 1.31 (t, *J* = 7.1 Hz, 3H). **<sup>13</sup>C NMR** (101 MHz, CDCl<sub>3</sub>) δ 153.5, 87.5, 77.3, 66.1, 62.2, 45.7, 28.8, 28.5, 25.75, 25.70, 14.1. **IR** (neat) *V*<sub>max</sub> (cm<sup>-1</sup>): 3397, 2954, 2236, 1710, 1242. **HRMS** (ESI): calc for C<sub>11</sub>H<sub>16</sub>O<sub>3</sub> *m/z*: 196.1099 found [M+H]<sup>+</sup> 197.1173.

### Ethyl 4-cyclohexyl-4-hydroxy-2-butynoate (±)-**S8**

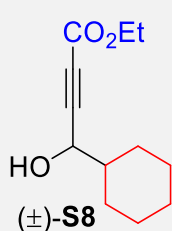

The general procedure for the synthesis of alkynoates was followed as described using *n*BuLi (2.5 M in Hexanes, 36.69 mmol, 14.68 mL, 1.2 eq.), ethyl propiolate (3.0 g, 30.58 mmol, 1.0 eq.) in THF (200 mL) and cyclohexanecarboxyaldehyde (0.65 g, 14.68 mmol, 1.2 eq.) in THF (30 mL). Compound (±)-**S8** was obtained as light-brown oil (2.96 g, 20.79 mmol, 68% yield). **<sup>1</sup>H NMR** (400 MHz, CDCl<sub>3</sub>) δ 4.22-4.29 (m, 3H), 1.84-1.89 (m, 3H), 1.74-1.82 (m, 2H), 1.58-1.72 (m, 2H), 1.32 (t, *J* = 7.1 Hz, 3H), 1.18-1.29 (m, 3H), 1.06-1.18 (m, 2H). **<sup>13</sup>C NMR** (101 MHz, CDCl<sub>3</sub>) δ 153.5, 87.2, 77.5, 67.0, 62.2, 43.7, 28.4, 28.2, 26.2, 25.87, 25.86, 14.1. The data obtained agrees with literature data.<sup>3a</sup>

### Ethyl 4-hydroxy-4-phenyl-2-hexynoate (±)-**S9**

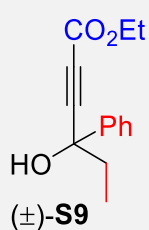

The general procedure for the synthesis of alkynoates was followed as described using *n*BuLi (2.5 M in Hexanes, 36.69 mmol, 14.68 mL, 1.2 eq.), ethyl propiolate (3.0 g, 30.58 mmol, 1.0 eq.) in THF (200 mL) and propiophenone (1.97 g, 14.68 mmol, 1.2 eq.) in THF (30 mL). Compound (±)-**S9** was obtained as colourless oil (3.76 g, 16.21 mmol, 53% yield). **<sup>1</sup>H NMR** (400 MHz, CDCl<sub>3</sub>) δ 7.48-7.54 (m, 2H), 7.28-7.34 (m, 2H), 7.21-7.27 (m, 1H), 4.19 (q, *J* = 7.1 Hz, 2H), 2.54 (s, 1H, OH), 1.85-2.04 (m, 2H), 1.26 (t, *J* = 7.1 Hz, 3H), 0.90 (t, *J* = 7.4 Hz, 3H). **<sup>13</sup>C NMR** (101 MHz, CDCl<sub>3</sub>) δ 153.5, 142.7, 128.5, 128.3, 125.4, 88.7, 77.7, 73.9, 62.3, 37.9, 14.1, 8.9. The data obtained agrees with literature data.<sup>3b</sup>

## Synthesis of $\beta$ - and $\gamma$ - disubstituted, $\alpha,\beta$ -unsaturated lactones ( $\pm$ )-11a-11w

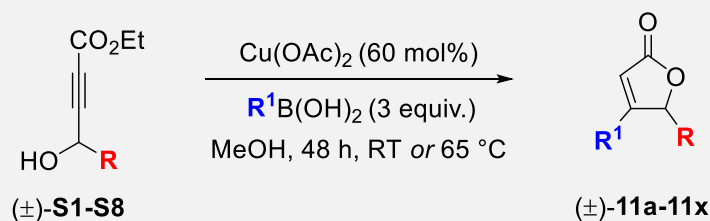

### General experimental procedure for the synthesis of butenolides ( $\pm$ )-11a-11w:

A solution of alkynoate (5.50 mmol, 1.0 eq.) in MeOH (10 mL) was added to the stirring blue pre-mixed solution of  $\text{Cu(OAc)}_2$  (0.599 g, 3.3 mmol, 0.6 eq.) and aryl boronic acid (16.5 mmol, 3.0 eq.) in MeOH (30 mL). The resulting mixture was stirred at room temperature\* (unless stated otherwise e.g. at 65 °C) for 48 h. Afterwards, the mixture was diluted with EtOAc (50 mL), and then added into a separating funnel which contains saturated aqueous solution of ammonium chloride (30 mL). The aqueous layer was further extracted with EtOAc (20 mL). The combined organic layers were washed with de-ionised water (20 mL), brine (45 mL), dried with  $\text{MgSO}_4$ , filtered, and concentrated *in vacuo*. Purification by silica gel chromatography using 5-10% EtOAc in hexanes furnished  $\beta$ - and  $\gamma$ - disubstituted,  $\alpha,\beta$ -unsaturated lactones.

**Note:** The reaction works well either under the atmosphere of nitrogen or air. The reaction doesn't work if crude alkynoate was employed. In most cases, the butenolides have the same  $R_f$  as the alkynoates and very difficult to separate by silica gel chromatography. However, it was noted that all the alkynoates were fully consumed within 48 h, although some might not need 48 h reaction time. Hetero aryl boronic acids failed to perform in this reaction (either at RT or 65 °C), alkynoates were recovered in all cases. \*Room temperature refers to the laboratory/fumehood temperature which was between 15 °C–18 °C during Scottish winter.

#### Failed boronic acids

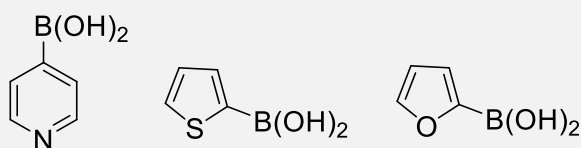

#### Failed Alkynoate

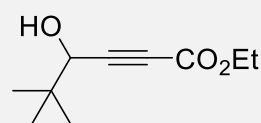



### 5-Methyl-4-phenyl-2(5*H*)-furanone (±)-**11a**

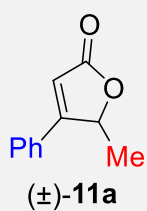

The general procedure for the synthesis of butenolides was followed as described using (±)-**S1** (0.78 g, 5.50 mmol, 1.0 eq.) in MeOH (10 mL), Cu(OAc)<sub>2</sub> (0.599 g, 3.3 mmol, 0.6 eq.) and phenyl boronic acid (2.01 g, 16.5 mmol, 3.0 eq.) in MeOH (30 mL). Purification by silica gel chromatography using 5-10% ethyl acetate in hexane produced (±)-**11a** as a colourless oil (0.77 g, 4.42 mmol, 80% yield). **<sup>1</sup>H NMR** (400 MHz, CDCl<sub>3</sub>) δ 7.45–7.51 (m, 5H), 6.27 (d, *J* = 1.4 Hz, 1H), 5.56 (qd, *J* = 6.8, 1.5 Hz, 1H), 1.53 (d, *J* = 6.8 Hz, 3H). **<sup>13</sup>C NMR** (101 MHz, CDCl<sub>3</sub>) δ 172.7, 169.0, 131.4, 130.0, 129.3, 127.3, 113.8, 78.7, 19.9. The data obtained agrees with literature data.<sup>4a</sup>

### 5-Ethyl-4-phenyl-2(5*H*)-furanone (±)-**11b**

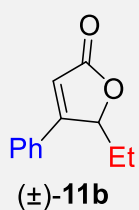

The general procedure for the synthesis of butenolides was followed as described using (±)-**S2** (0.86 g, 5.50 mmol, 1.0 eq.) in MeOH (10 mL), Cu(OAc)<sub>2</sub> (0.599 g, 3.3 mmol, 0.6 eq.) and phenyl boronic acid (2.01 g, 16.5 mmol, 3.0 eq.) in MeOH (30 mL). Purification by silica gel chromatography using 5-10% ethyl acetate in hexane produced (±)-**11b** as a colourless oil (0.81 g, 4.29 mmol, 78% yield). **<sup>1</sup>H NMR** (400 MHz, CDCl<sub>3</sub>) δ 7.44–7.50 (m, 5H), 6.28 (d, *J* = 1.5 Hz, 1H), 5.50 (ddd, *J* = 6.9, 3.4, 1.5 Hz, 1H), 2.10 (dq, *J* = 14.8, 7.4, 3.4 Hz, 1H), 1.66 (dq, *J* = 14.8, 7.4 Hz, 1H), 0.92 (t, *J* = 7.4 Hz, 3H). **<sup>13</sup>C NMR** (101 MHz, CDCl<sub>3</sub>) δ 173.0, 167.5, 131.3, 130.3, 129.3, 127.2, 114.8, 83.1, 26.4, 8.3. The data obtained agrees with literature data.<sup>4b</sup>

### 5-(1-Methylethyl)-4-phenyl-2(5*H*)-furanone (±)-**11c**

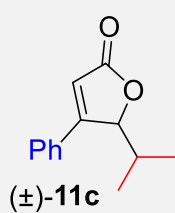

The general procedure for the synthesis of butenolides was followed as described using (±)-**S3** (0.94 g, 5.50 mmol, 1.0 eq.) in MeOH (10 mL), Cu(OAc)<sub>2</sub> (0.599 g, 3.3 mmol, 0.6 eq.) and phenyl boronic acid (2.01 g, 16.5 mmol, 3.0 eq.) in MeOH (30 mL). Purification by silica gel chromatography using 5-10% ethyl acetate in hexane produced (±)-**11c** as a colourless oil (0.91 g, 4.51 mmol, 82% yield). **<sup>1</sup>H NMR** (400 MHz, CDCl<sub>3</sub>) δ 7.41–7.54 (m, 5H), 6.27 (d, *J* = 1.5 Hz, 1H), 5.44 (dd, *J* = 2.5, 1.6 Hz, 1H), 2.17 (pd, *J* = 6.9, 2.5 Hz, 1H), 1.23 (d, *J* = 6.9 Hz, 3H), 0.63 (d, *J* = 6.9 Hz, 3H). **<sup>13</sup>C NMR** (101 MHz, CDCl<sub>3</sub>) δ 173.3, 167.4, 131.3, 130.6, 129.3, 127.2, 115.1, 86.4, 30.8, 20.3, 13.5. The data obtained agrees with literature data.<sup>4c</sup>

### 5-Pentyl-4-phenyl-2(5*H*)-furanone (±)-**11d**

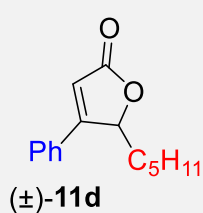

The general procedure for the synthesis of butenolides was followed as described using (±)-**S4** (1.09 g, 5.50 mmol, 1.0 eq.) in MeOH (10 mL), Cu(OAc)<sub>2</sub> (0.599 g, 3.3 mmol, 0.6 eq.) and phenyl boronic acid (2.01 g, 16.5 mmol, 3.0 eq.) in MeOH (30 mL). Purification by silica gel chromatography using 5-10% ethyl acetate in hexane produced (±)-**11d** as a colourless oil (0.86 g, 3.74 mmol, 68% yield). **<sup>1</sup>H NMR** (400 MHz, CDCl<sub>3</sub>) δ 7.43–7.51 (m, 5H), 6.27 (d, *J* = 1.5 Hz, 1H), 5.50 (ddd, *J* = 7.9, 3.1, 1.5 Hz, 1H), 1.93–2.04 (m, 1H), 1.51–1.64 (m, 1H), 1.35–1.50 (m, 2H), 1.20–1.33 (m, 4H), 0.78–0.87 (m, 3H). **<sup>13</sup>C NMR** (101 MHz, CDCl<sub>3</sub>) δ 173.0, 167.9, 131.3, 130.3, 129.3, 127.2, 114.5, 82.4, 33.6, 31.4, 24.3, 22.5, 14.0. The data obtained agrees with literature data.<sup>4d</sup>

### 5-Cyclopropyl-4-phenyl-2(5*H*)-furanone (±)-**11e**

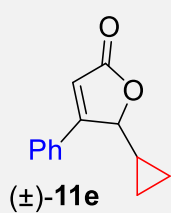

The general procedure for the synthesis of butenolides was followed as described using (±)-**S5** (0.92 g, 5.50 mmol, 1.0 eq.) in MeOH (10 mL), Cu(OAc)<sub>2</sub> (0.599 g, 3.3 mmol, 0.6 eq.) and phenyl boronic acid (2.01 g, 16.5 mmol, 3.0 eq.) in MeOH (30 mL). Purification by silica gel chromatography using 5-10% ethyl acetate in hexane produced (±)-**11e** as a white solid (0.66 g, 3.30 mmol, 60% yield). **<sup>1</sup>H NMR** (400 MHz, CDCl<sub>3</sub>) δ 7.53–7.57 (m, 2H), 7.47–7.50 (m, 3H), 6.25 (d, *J* = 1.5 Hz, 1H), 5.19 (dd, *J* = 6.5, 1.5 Hz, 1H), 1.02–1.13 (m, 1H), 0.60–0.72 (m, 2H), 0.47–0.57 (m, 2H). **<sup>13</sup>C NMR** (101 MHz, CDCl<sub>3</sub>) δ 172.7, 168.2, 131.3, 130.5, 129.2, 127.6, 114.3, 84.0, 83.9, 14.0, 4.2, 1.8. **IR** (neat) *V*<sub>max</sub> (cm<sup>-1</sup>): 1718, 1316, 1264, 1031. **HRMS** (ESI): calc for C<sub>13</sub>H<sub>12</sub>O<sub>2</sub> *m/z*: 200.0837 found [M+H]<sup>+</sup> 201.0911. **MP**: 50–52 °C.

### 5-Cyclobutyl-4-phenyl-2(5*H*)-furanone (±)-**11f**

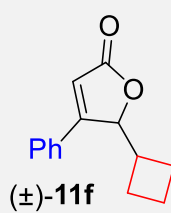

The general procedure for the synthesis of butenolides was followed as described using (±)-**S6** (1.00 g, 5.50 mmol, 1.0 eq.) in MeOH (10 mL), Cu(OAc)<sub>2</sub> (0.599 g, 3.3 mmol, 0.6 eq.) and phenyl boronic acid (2.01 g, 16.5 mmol, 3.0 eq.) in MeOH (30 mL). Purification by silica gel chromatography using 5-10% ethyl acetate in hexane produced (±)-**11f** as a white solid (0.71 g, 3.30 mmol, 60% yield). **<sup>1</sup>H NMR** (400 MHz, CDCl<sub>3</sub>) δ 7.40–7.52 (m, 5H), 6.24 (d, *J* = 1.4 Hz, 1H), 5.44 (dd, *J* = 3.5, 1.5 Hz, 1H), 2.77 (pd, *J* = 8.4, 3.4 Hz, 1H), 2.22–2.37 (m, 1H), 1.99–2.07 (m, 1H), 1.66–1.87 (m, 3H), 1.47–1.59 (m, 1H). **<sup>13</sup>C NMR** (101 MHz, CDCl<sub>3</sub>) δ 173.3, 166.6, 131.3, 130.5, 129.2, 127.2, 114.7, 83.4, 37.5, 24.6, 20.5, 17.8. **IR** (neat) *V*<sub>max</sub> (cm<sup>-1</sup>): 1725, 1307, 1269, 1169, 1033. **HRMS** (ESI): calc for C<sub>14</sub>H<sub>14</sub>O<sub>2</sub> *m/z*: 214.0994 found [M+H]<sup>+</sup> 215.1068. **MP**: 55–57 °C.

### 5-Cyclopentyl-4-phenyl-2(5*H*)-furanone (±)-**11g**

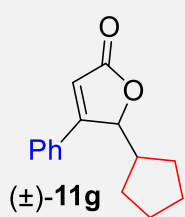

The general procedure for the synthesis of butenolides was followed as described using (±)-**S7** (1.07 g, 5.50 mmol, 1.0 eq.) in MeOH (10 mL), Cu(OAc)<sub>2</sub> (0.599 g, 3.3 mmol, 0.6 eq.) and phenyl boronic acid (2.01 g, 16.5 mmol, 3.0 eq.) in MeOH (30 mL). Purification by silica gel chromatography using 5-10% ethyl acetate in hexane produced (±)-**11g** as a white solid (0.94 g, 4.13 mmol, 75% yield). **<sup>1</sup>H NMR** (400 MHz, CDCl<sub>3</sub>) δ 7.42–7.51 (m, 5H), 6.25 (d, *J* = 1.5 Hz, 1H), 5.60 (dd, *J* = 3.0, 1.5 Hz, 1H), 2.32 (pd, *J* = 8.5, 3.0 Hz, 1H), 1.75–1.91 (m, 2H), 1.62–1.72 (m, 1H), 1.53–1.62 (m, 1H), 1.46–1.52 (m, 1H), 1.34–1.42 (m, 1H), 1.13–1.23 (m, 1H), 1.00–1.11 (m, 1H). **<sup>13</sup>C NMR** (101 MHz, CDCl<sub>3</sub>) δ 173.4, 168.0, 131.2, 130.6, 129.3, 127.2, 115.0, 83.9, 41.6, 29.7, 25.8, 25.5, 23.8. **IR** (neat) *V*<sub>max</sub> (cm<sup>-1</sup>): 1728, 1314, 1268, 1170, 1034. **HRMS** (ESI): calc for C<sub>15</sub>H<sub>16</sub>O<sub>2</sub> *m/z*: 228.1150 found [M+H]<sup>+</sup> 229.1224. **MP**: 60–62 °C.

### 5-Cyclohexyl-4-phenyl-2(5*H*)-furanone (±)-**11h**

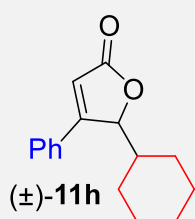

The general procedure for the synthesis of butenolides was followed as described using (±)-**S8** (1.16 g, 5.50 mmol, 1.0 eq.) in MeOH (10 mL), Cu(OAc)<sub>2</sub> (0.599 g, 3.3 mmol, 0.6 eq.) and phenyl boronic acid (2.01 g, 16.5 mmol, 3.0 eq.) in MeOH (30 mL). Purification by silica gel chromatography using 5-10% ethyl acetate in hexane produced (±)-**11h** as a white solid (1.11 g, 4.57 mmol, 83% yield). **<sup>1</sup>H NMR** (400 MHz, CDCl<sub>3</sub>) δ 7.41–7.56 (m, 5H), 6.25 (d, *J* = 1.5 Hz, 1H), 5.39 (t, *J* = 1.9 Hz, 1H), 1.74–1.89 (m, 3H), 1.56–1.67 (m, 3H), 1.07–1.33 (m, 3H), 0.95–1.07 (m, 2H). **<sup>13</sup>C NMR** (101 MHz, CDCl<sub>3</sub>) δ 173.2, 167.1, 131.3, 130.7, 129.3, 127.2, 115.1, 86.3, 40.3, 30.6, 26.6, 25.9, 25.7, 23.8. The data obtained agrees with literature data.<sup>4c</sup>

### 5-isopropyl-4-(*m*-tolyl)furan-2(5*H*)-one (±)-**11i**

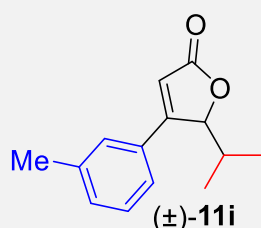

The general procedure for the synthesis of butenolides was followed as described using (±)-**S3** (0.94 g, 5.50 mmol, 1.0 eq.) in MeOH (10 mL), Cu(OAc)<sub>2</sub> (0.599 g, 3.3 mmol, 0.6 eq.) and *m*-tolyl boronic acid (2.24 g, 16.5 mmol, 3.0 eq.) in MeOH (30 mL). Purification by silica gel chromatography using 5-10% ethyl acetate in hexane produced

(±)-**11i** as a colourless oil (0.83 g, 3.85 mmol, 70% yield). **<sup>1</sup>H NMR** (400 MHz, CDCl<sub>3</sub>) δ 7.33-7.37 (m, 1H), 7.28-7.31 (m, 1H), 7.22-7.25 (m, 2H), 6.25 (d, *J* = 1.5 Hz, 1H), 5.42 (dd, *J* = 2.5, 1.5 Hz, 1H), 2.41 (s, 3H), 2.16 (pd, *J* = 6.9, 2.5 Hz, 1H), 1.23 (d, *J* = 6.9 Hz, 3H), 0.63 (d, *J* = 6.9 Hz, 3H). **<sup>13</sup>C NMR** (101 MHz, CDCl<sub>3</sub>) δ 173.3, 167.6, 139.2, 132.1, 130.5, 129.2, 127.8, 124.3, 114.9, 86.4, 30.8, 21.5, 20.3, 13.5. **IR** (neat) *V*<sub>max</sub> (cm<sup>-1</sup>): 2926, 1727, 1449, 1174. **HRMS** (ESI): calc for C<sub>14</sub>H<sub>16</sub>O<sub>2</sub> *m/z*: 216.1150 found [M+H]<sup>+</sup> 217.1224.

### 4-(4-acetylphenyl)-5-isopropylfuran-2(5*H*)-one (±)-**11j**

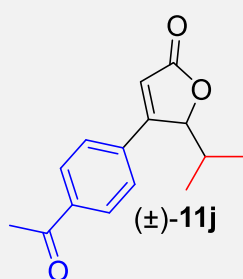

The general procedure for the synthesis of butenolides was followed as described using (±)-**S3** (0.94 g, 5.50 mmol, 1.0 eq.) in MeOH (10 mL), Cu(OAc)<sub>2</sub> (0.599 g, 3.3 mmol, 0.6 eq.) and 4-acetylphenylboronic acid (2.71 g, 16.5 mmol, 3.0 eq.) in MeOH (30 mL). Purification by silica gel chromatography using 5-10% ethyl acetate in hexane produced

(±)-**11j** as a white solid (1.03 g, 4.24 mmol, 77% yield). **<sup>1</sup>H NMR** (400 MHz, CDCl<sub>3</sub>) δ 8.04 (d, *J* = 8.6 Hz, 2H), 7.55 (d, *J* = 8.6 Hz, 2H), 6.37 (d, *J* = 1.6 Hz, 1H), 5.46 (dd, *J* = 2.5, 1.6 Hz, 1H), 2.64 (s, 3H), 2.14 (pd, *J* = 6.9, 2.5 Hz, 1H), 1.24 (d, *J* = 6.9 Hz, 3H), 0.63 (d, *J* = 6.9 Hz, 3H). **<sup>13</sup>C NMR** (101 MHz, CDCl<sub>3</sub>) δ 197.1, 172.6, 165.9, 138.9, 134.7, 129.2, 127.5, 117.2, 86.4, 30.7, 26.8, 20.2, 13.6. **IR** (neat) *V*<sub>max</sub> (cm<sup>-1</sup>): 2964, 1727, 1685, 1263, 1174. **HRMS** (ESI): calc for C<sub>15</sub>H<sub>16</sub>O<sub>3</sub> *m/z*: 244.1099 found [M+H]<sup>+</sup> 245.1173. **MP**: 85-87 °C.

### 5-isopropyl-4-(naphthalen-1-yl)furan-2(5H)-one (±)-**11k**

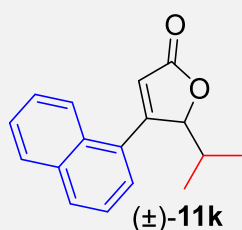

The general procedure for the synthesis of butenolides was followed as described using (±)-**S3** (0.94 g, 5.50 mmol, 1.0 eq.) in MeOH (10 mL), Cu(OAc)<sub>2</sub> (0.599 g, 3.3 mmol, 0.6 eq.) and Naphthalene-1-boronic acid (2.84 g, 16.5 mmol, 3.0 eq.) in MeOH (30 mL). Purification by silica gel chromatography using 5-10% ethyl acetate in hexane produced (±)-**11k** as a white solid (1.19 g, 4.73 mmol, 86% yield). **<sup>1</sup>H NMR** (400 MHz, CDCl<sub>3</sub>) δ 7.87-7.94 (m, 4H), 7.52-7.61 (m, 3H), 6.39 (d, *J* = 1.5 Hz, 1H), 5.57 (dd, *J* = 2.5, 1.5 Hz, 1H), 2.26 (pd, *J* = 6.9, 2.5 Hz, 1H), 1.28 (d, *J* = 6.9 Hz, 3H), 0.65 (d, *J* = 6.9 Hz, 3H). **<sup>13</sup>C NMR** (101 MHz, CDCl<sub>3</sub>) δ 173.3, 167.2, 134.5, 133.0, 129.3, 128.8, 128.08, 128.04, 127.9, 127.35, 127.30, 124.1, 115.4, 86.5, 31.0, 20.4, 13.6. **IR** (neat) *V*<sub>max</sub> (cm<sup>-1</sup>): 2966, 1727, 1464, 1180. **HRMS** (ESI): calc for C<sub>17</sub>H<sub>16</sub>O<sub>2</sub> *m/z*: 252.1150 found [M+H]<sup>+</sup> 253.1224. **MP**: 95-97 °C.

### 4-(3-fluorophenyl)-5-isopropylfuran-2(5H)-one (±)-**11l**

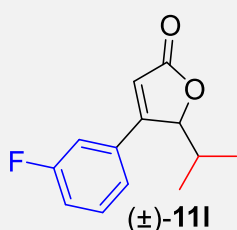

The general procedure for the synthesis of butenolides was followed as described using (±)-**S3** (0.94 g, 5.50 mmol, 1.0 eq.) in MeOH (10 mL), Cu(OAc)<sub>2</sub> (0.599 g, 3.3 mmol, 0.6 eq.) and 3-fluorophenyl boronic acid (2.31 g, 16.5 mmol, 3.0 eq.) in MeOH (30 mL) at 65 °C. Purification by silica gel chromatography using 5-10% ethyl acetate in hexane produced (±)-**11l** as a white solid (0.73 g, 3.30 mmol, 60% yield). **<sup>1</sup>H NMR** (400 MHz, CDCl<sub>3</sub>) δ 7.43-7.48 (m, 1H), 7.23-7.25 (m, 1H), 7.13-7.22 (m, 2H), 6.29 (d, *J* = 1.5 Hz, 1H), 5.40 (dd, *J* = 2.5, 1.5 Hz, 1H), 2.15 (pd, *J* = 6.9, 2.5 Hz, 1H), 1.24 (d, *J* = 6.9 Hz, 3H), 0.64 (d, *J* = 6.9 Hz, 3H). **<sup>13</sup>C NMR** (101 MHz, CDCl<sub>3</sub>) δ 172.7, 165.9 (d, *J*<sub>C-F</sub> = 2.5 Hz, 1C), 163.1 (d, *J*<sub>C-F</sub> = 248.5 Hz, 1C), 132.6 (d, *J*<sub>C-F</sub> = 7.8 Hz, 1C), 131.1 (d, *J*<sub>C-F</sub> = 8.3 Hz, 1C), 122.9 (d, *J*<sub>C-F</sub> = 3.1 Hz, 1C), 118.2 (d, *J*<sub>C-F</sub> = 21.2 Hz, 1C), 116.4, 114.2 (d, *J*<sub>C-F</sub> = 22.5 Hz, 1C), 86.3, 30.7, 20.2, 13.6. **<sup>19</sup>F NMR** (377 MHz, CDCl<sub>3</sub>) δ -110.94. **IR** (neat) *V*<sub>max</sub> (cm<sup>-1</sup>): 2968, 1727, 1449, 1176. **HRMS** (ESI): calc for C<sub>13</sub>H<sub>13</sub>FO<sub>2</sub> *m/z*: 200.0900 found [M+H]<sup>+</sup> 201.0974. **MP**: 110-112 °C.

#### 4-(4-fluorophenyl)-5-isopropylfuran-2(5H)-one (±)-**11m**

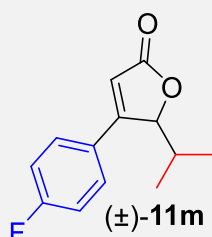

The general procedure for the synthesis of butenolides was followed as described using (±)-**S3** (0.94 g, 5.50 mmol, 1.0 eq.) in MeOH (10 mL), Cu(OAc)<sub>2</sub> (0.599 g, 3.3 mmol, 0.6 eq.) and 4-fluorophenyl boronic acid (2.31 g, 16.5 mmol, 3.0 eq.) in MeOH (30 mL) at 65 °C. Purification by silica gel chromatography using 5-10% ethyl acetate in hexane produced (±)-**11m** as a white solid (0.79 g, 3.63 mmol, 66% yield). **<sup>1</sup>H NMR** (400 MHz, CDCl<sub>3</sub>) δ 7.44-7.49 (m, 2H), 7.14-7.20 (m, 2H), 6.24 (d, *J* = 1.5 Hz, 1H), 5.40 (dd, *J* = 2.5, 1.5 Hz, 1H), 2.13 (pd, *J* = 6.9, 2.5 Hz, 1H), 1.24 (d, *J* = 6.9 Hz, 3H), 0.62 (d, *J* = 6.9 Hz, 3H). **<sup>13</sup>C NMR** (101 MHz, CDCl<sub>3</sub>) δ 173.0, 166.1, 164.4 (d, *J*<sub>C-F</sub> = 253.2 Hz, 1C), 129.3 (d, *J*<sub>C-F</sub> = 8.7 Hz, 1C), 126.8 (d, *J*<sub>C-F</sub> = 3.5 Hz, 1C), 116.6 (d, *J*<sub>C-F</sub> = 22.0 Hz, 1C), 115.0 (d, *J*<sub>C-F</sub> = 1.6 Hz, 1C), 86.3, 30.8, 20.3, 13.5. **<sup>19</sup>F NMR** (377 MHz, CDCl<sub>3</sub>) δ -107.64. **IR** (neat) *V*<sub>max</sub> (cm<sup>-1</sup>): 2967, 1727, 1510, 1186. **HRMS** (ESI): calc for C<sub>13</sub>H<sub>13</sub>FO<sub>2</sub> *m/z*: 200.0900 found [M+H]<sup>+</sup> 201.0974. **MP**: 110-112 °C.

#### 5-isopropyl-4-(4-methoxyphenyl)furan-2(5H)-one (±)-**11n**

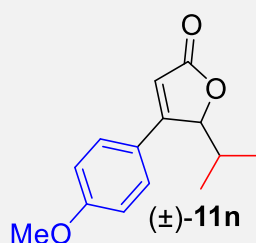

The general procedure for the synthesis of butenolides was followed as described using (±)-**S3** (0.94 g, 5.50 mmol, 1.0 eq.) in MeOH (10 mL), Cu(OAc)<sub>2</sub> (0.599 g, 3.3 mmol, 0.6 eq.) and 4-methoxyphenyl boronic acid (2.51 g, 16.5 mmol, 3.0 eq.) in MeOH (30 mL). Purification by silica gel chromatography using 5-10% ethyl acetate in hexane produced (±)-**11n** as a yellow oil (1.02 g, 4.40 mmol, 80% yield). **<sup>1</sup>H NMR** (400 MHz, CDCl<sub>3</sub>) δ 7.43 (d, *J* = 8.9 Hz, 2H), 6.99 (d, *J* = 8.9 Hz, 2H), 6.19 (d, *J* = 1.4 Hz, 1H), 5.41 (dd, *J* = 2.5, 1.4 Hz, 1H), 3.88 (s, 3H), 2.19 (pd, *J* = 6.9, 2.5 Hz, 1H), 1.26 (d, *J* = 6.9 Hz, 3H), 0.64 (d, *J* = 6.9 Hz, 3H). **<sup>13</sup>C NMR** (101 MHz, CDCl<sub>3</sub>) δ 173.6, 166.9, 162.1, 128.9, 123.0, 114.7, 112.8, 86.2, 55.6, 31.0, 20.3, 13.4. **IR** (neat) *V*<sub>max</sub> (cm<sup>-1</sup>): 2933, 1727, 1512, 1259. **HRMS** (ESI): calc for C<sub>14</sub>H<sub>16</sub>O<sub>3</sub> *m/z*: 232.1099 found [M+H]<sup>+</sup> 233.1173.

### 5-cyclopropyl-4-(*m*-tolyl)furan-2(5*H*)-one (±)-**11o**

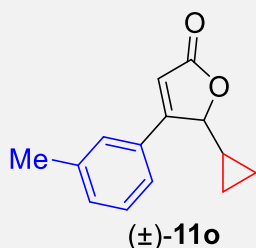

The general procedure for the synthesis of butenolides was followed as described using (±)-**S5** (0.92 g, 5.50 mmol, 1.0 eq.) in MeOH (10 mL), Cu(OAc)<sub>2</sub> (0.599 g, 3.3 mmol, 0.6 eq.) and *m*-tolyl boronic acid (2.24 g, 16.5 mmol, 3.0 eq.) in MeOH (30 mL). Purification by silica gel chromatography using 5-10% ethyl acetate in hexane produced (±)-**11o** as a white solid (0.88 g, 4.12 mmol, 75% yield). **<sup>1</sup>H NMR** (400 MHz, CDCl<sub>3</sub>) δ 7.32-7.37 (m, 3H), 7.29-7.31 (m, 1H), 6.23 (d, *J* = 1.5 Hz, 1H), 5.20 (dd, *J* = 6.3, 1.5 Hz, 1H), 2.42 (s, 3H), 1.03-1.12 (m, 1H), 0.61-0.71 (m, 2H), 0.47-0.55 (m, 2H). **<sup>13</sup>C NMR** (101 MHz, CDCl<sub>3</sub>) δ 172.9, 168.4, 139.0, 132.1, 130.5, 129.0, 128.2, 124.7, 114.0, 83.8, 21.5, 14.0, 4.2, 1.7. **IR** (neat) *V*<sub>max</sub> (cm<sup>-1</sup>): 2921, 1731, 1162, 1059. **HRMS** (ESI): calc for C<sub>14</sub>H<sub>14</sub>O<sub>2</sub> *m/z*: 214.0994 found [M+H]<sup>+</sup> 215.1068. **MP**: 55-57 °C.

### 5-cyclobutyl-4-(*m*-tolyl)furan-2(5*H*)-one (±)-**11p**

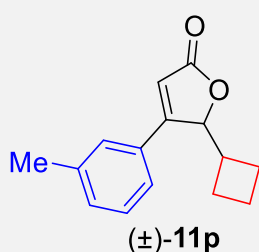

The general procedure for the synthesis of butenolides was followed as described using (±)-**S6** (1.00 g, 5.50 mmol, 1.0 eq.) in MeOH (10 mL), Cu(OAc)<sub>2</sub> (0.599 g, 3.3 mmol, 0.6 eq.) and *m*-tolyl boronic acid (2.24 g, 16.5 mmol, 3.0 eq.) in MeOH (30 mL). Purification by silica gel chromatography using 5-10% ethyl acetate in hexane produced (±)-**11p** as a colourless oil (0.99 g, 4.34 mmol, 79% yield). **<sup>1</sup>H NMR** (400 MHz, CDCl<sub>3</sub>) δ 7.32-7.36 (m, 1H), 7.27-7.30 (m, 1H), 7.20-7.23 (m, 2H), 6.22 (d, *J* = 1.4 Hz, 1H), 5.43 (dd, *J* = 3.5, 1.4 Hz, 1H), 2.77 (dh, *J* = 8.4, 3.3 Hz, 1H), 2.40 (s, 3H), 2.24-2.32 (m, 1H), 1.99-2.08 (m, 1H), 1.68-1.81 (m, 3H), 1.47-1.56 (m, 1H). **<sup>13</sup>C NMR** (101 MHz, CDCl<sub>3</sub>) δ 173.5, 166.8, 139.1, 132.1, 130.4, 129.1, 127.8, 124.3, 114.5, 83.4, 37.5, 24.6, 21.5, 20.4, 17.8. **IR** (neat) *V*<sub>max</sub> (cm<sup>-1</sup>): 2937, 1742, 1161, 1033. **HRMS** (ESI): calc for C<sub>15</sub>H<sub>16</sub>O<sub>2</sub> *m/z*: 228.1150 found [M+H]<sup>+</sup> 229.1224.



### 5-cyclopentyl-4-(4-methoxyphenyl)furan-2(5H)-one (±)-**11q**

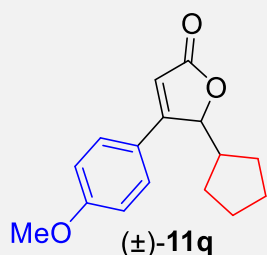

The general procedure for the synthesis of butenolides was followed as described using (±)-**S7** (1.08 g, 5.50 mmol, 1.0 eq.) in MeOH (10 mL), Cu(OAc)<sub>2</sub> (0.599 g, 3.3 mmol, 0.6 eq.) and 4-methoxyphenyl boronic acid (2.51 g, 16.5 mmol, 3.0 eq.) in MeOH (30 mL). Purification by silica gel chromatography using 5-10% ethyl acetate in hexane produced (±)-**11q** as a white solid (1.21 g, 4.68 mmol, 85% yield). **<sup>1</sup>H NMR** (400 MHz, CDCl<sub>3</sub>) δ 7.42 (d, *J* = 8.9 Hz, 2H), 6.97 (d, *J* = 8.9 Hz, 2H), 6.15 (d, *J* = 1.4 Hz, 1H), 5.56 (dd, *J* = 2.9, 1.4 Hz, 1H), 3.86 (s, 3H), 2.33 (pd, *J* = 8.9, 2.9 Hz, 1H), 1.78-1.91 (m, 2H), 1.64-1.72 (m, 1H), 1.56-1.62 (m, 1H), 1.48-1.54 (m, 1H), 13.4-1.42 (m, 1H), 1.12-1.19 (m, 1H), 1.04-1.09 (m, 1H). **<sup>13</sup>C NMR** (101 MHz, CDCl<sub>3</sub>) δ 173.8, 167.5, 162.0, 128.9, 123.1, 114.7, 112.7, 83.7, 55.6, 42.0, 29.7, 25.8, 25.5, 23.7. **IR** (neat) *V*<sub>max</sub> (cm<sup>-1</sup>): 2939, 1727, 1262, 1174. **HRMS** (ESI): calc for C<sub>16</sub>H<sub>18</sub>O<sub>3</sub> *m/z*: 258.1256 found [M+H]<sup>+</sup> 259.1330. **MP**: 108-110 °C.

### 5-cyclohexyl-4-(naphthalen-1-yl)furan-2(5H)-one (±)-**11r**

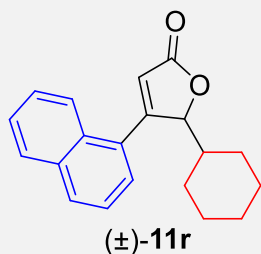

The general procedure for the synthesis of butenolides was followed as described using (±)-**S8** (1.16 g, 5.50 mmol, 1.0 eq.) in MeOH (10 mL), Cu(OAc)<sub>2</sub> (0.599 g, 3.3 mmol, 0.6 eq.) and Naphthalene-1-boronic acid (2.84 g, 16.5 mmol, 3.0 eq.) in MeOH (30 mL). Purification by silica gel chromatography using 5-10% ethyl acetate in hexane produced (±)-**11r** as a white solid (1.30 g, 4.46 mmol, 81% yield). **<sup>1</sup>H NMR** (400 MHz, CDCl<sub>3</sub>) δ 7.87-7.94 (m, 4H), 7.51-7.62 (m, 3H), 6.37 (d, *J* = 1.6 Hz, 1H), 5.53 (t, *J* = 1.6 Hz, 1H), 1.89-1.94 (m, 2H), 1.79-1.86 (m, 1H), 1.56-1.62 (m, 2H), 1.17-1.26 (m, 3H), 1.07-1.12 (m, 1H), 1.02-1.06 (m, 1H), 0.92-0.99 (m, 1H). **<sup>13</sup>C NMR** (101 MHz, CDCl<sub>3</sub>) δ 173.3, 166.9, 134.5, 133.0, 129.3, 128.9, 128.0, 127.3, 127.2, 124.1, 115.4, 86.3, 40.5, 30.6, 26.6, 25.9, 25.7, 23.8. **IR** (neat) *V*<sub>max</sub> (cm<sup>-1</sup>): 2924, 1719, 1447, 1171. **HRMS** (ESI): calc for C<sub>20</sub>H<sub>20</sub>O<sub>2</sub> *m/z*: 292.1463 found [M+H]<sup>+</sup> 293.1537. **MP**: 120-122 °C.

### 5-cyclohexyl-4-(3-fluorophenyl)furan-2(5H)-one (±)-**11s**

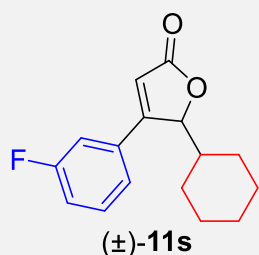

The general procedure for the synthesis of butenolides was followed as described using (±)-**S8** (1.16 g, 5.50 mmol, 1.0 eq.) in MeOH (10 mL), Cu(OAc)<sub>2</sub> (0.599 g, 3.3 mmol, 0.6 eq.) and 3-fluorophenyl boronic acid (2.31 g, 16.5 mmol, 3.0 eq.) in MeOH (30 mL) at 65 °C.

Purification by silica gel chromatography using 5-10% ethyl acetate in hexane produced (±)-**11s** as a white solid (0.86 g, 3.30 mmol, 60% yield). **<sup>1</sup>H NMR** (400 MHz, CDCl<sub>3</sub>) δ 7.46 (td, *J* = 8.0, 5.8 Hz, 1H), 7.22-7.25 (m, 1H), 7.17-7.22 (m, 1H), 7.13-7.16 (m, 1H), 6.27 (d, *J* = 1.6 Hz, 1H), 5.35 (t, *J* = 1.6 Hz, 1H), 1.77-1.87 (m, 3H), 1.57-1.65 (m, 3H), 1.22-1.26 (m, 1H), 1.14-1.17 (m, 1H), 1.04-1.12 (m, 1H), 0.97-1.03 (m, 2H). **<sup>13</sup>C NMR** (101 MHz, CDCl<sub>3</sub>) δ 172.7, 165.6 (d, *J*<sub>C-F</sub> = 2.5 Hz, 1C), 163.0 (d, *J*<sub>C-F</sub> = 248.5 Hz, 1C), 132.6 (d, *J*<sub>C-F</sub> = 7.7 Hz, 1C), 131.1 (d, *J*<sub>C-F</sub> = 8.3 Hz, 1C), 122.9 (d, *J*<sub>C-F</sub> = 3.1 Hz, 1C), 118.2 (d, *J*<sub>C-F</sub> = 21.2 Hz, 1C), 116.3, 114.1 (d, *J*<sub>C-F</sub> = 22.4 Hz, 1C), 86.2, 40.3, 30.5, 26.5, 25.8, 25.7, 23.8. **<sup>19</sup>F NMR** (377 MHz, CDCl<sub>3</sub>) δ -110.93. **IR** (neat) *V*<sub>max</sub> (cm<sup>-1</sup>): 2931, 1720, 1449, 1161. **HRMS** (ESI): calc for C<sub>16</sub>H<sub>17</sub>FO<sub>2</sub> *m/z*: 260.1213 found [M+H]<sup>+</sup> 261.1287. **MP**: 95-97 °C.

### 5-cyclohexyl-4-(*m*-tolyl)furan-2(5H)-one (±)-**11t**

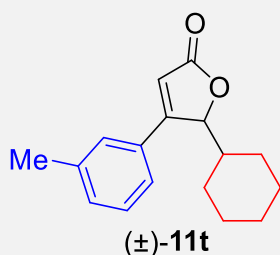

The general procedure for the synthesis of butenolides was followed as described using (±)-**S8** (1.16 g, 5.50 mmol, 1.0 eq.) in MeOH (10 mL), Cu(OAc)<sub>2</sub> (0.599 g, 3.3 mmol, 0.6 eq.) and *m*-tolyl boronic acid (2.24 g, 16.5 mmol, 3.0 eq.) in MeOH (30 mL).

Purification by silica gel chromatography using 5-10% ethyl acetate in hexane produced (±)-**11t** as a white solid (0.99 g, 3.85 mmol, 70% yield). **<sup>1</sup>H NMR** (400 MHz, CDCl<sub>3</sub>) δ 7.34-7.38 (m, 1H), 7.29-7.31 (m, 1H), 7.22-7.26 (m, 2H), 6.22 (d, *J* = 1.6 Hz, 1H), 5.37 (t, *J* = 1.9 Hz, 1H), 2.42 (s, 3H), 1.75-1.86 (m, 3H), 1.50-1.67 (m, 3H), 1.21-1.29 (m, 2H), 1.15-1.19 (m, 1H), 0.96-1.03 (m, 2H). **<sup>13</sup>C NMR** (101 MHz, CDCl<sub>3</sub>) δ 173.3, 167.3, 139.2, 132.1, 130.6, 129.2, 127.8, 124.3, 114.9, 86.3, 40.3, 30.6, 26.6, 25.9, 25.7, 23.8, 21.5. **IR** (neat) *V*<sub>max</sub> (cm<sup>-1</sup>): 2921, 1719, 1443, 1174. **HRMS** (ESI): calc for C<sub>17</sub>H<sub>20</sub>O<sub>2</sub> *m/z*: 256.1463 found [M+H]<sup>+</sup> 257.1537. **MP**: 75-77 °C.

### 5-cyclohexyl-4-(4-methoxyphenyl)furan-2(5*H*)-one (±)-**11u**

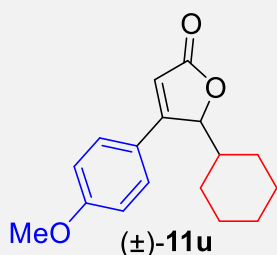

The general procedure for the synthesis of butenolides was followed as described using (±)-**S8** (1.16 g, 5.50 mmol, 1.0 eq.) in MeOH (10 mL), Cu(OAc)<sub>2</sub> (0.599 g, 3.3 mmol, 0.6 eq.) and 4-methoxyphenyl boronic acid (2.51 g, 16.5 mmol, 3.0 eq.) in MeOH (30 mL). Purification by silica gel chromatography using 5-10% ethyl acetate in hexane produced (±)-**11u** as a white solid (1.00 g, 3.69 mmol, 67% yield). **<sup>1</sup>H NMR** (400 MHz, CDCl<sub>3</sub>) δ 7.41 (d, *J* = 8.8 Hz, 2H), 6.98 (d, *J* = 8.8 Hz, 2H), 6.15 (d, *J* = 1.2 Hz, 1H), 5.34 (d, *J* = 1.7 Hz, 1H), 3.87 (s, 3H), 1.76-1.86 (m, 3H), 1.56-1.66 (m, 3H), 1.20-1.29 (m, 2H), 1.15-1.17 (m, 1H), 0.95-1.04 (m, 2H). **<sup>13</sup>C NMR** (101 MHz, CDCl<sub>3</sub>) δ 173.68, 166.57, 162.10, 128.94, 123.13, 114.79, 112.84, 86.16, 55.61, 40.68, 30.71, 26.70, 25.97, 25.82, 23.71. **IR** (neat) *V*<sub>max</sub> (cm<sup>-1</sup>): 2922, 1719, 1512, 1259, 1172. **HRMS** (ESI): calc for C<sub>17</sub>H<sub>20</sub>O<sub>3</sub> *m/z*: 272.1412 found [M+H]<sup>+</sup> 273.1490. **MP**: 110-112 °C.

### 5-cyclohexyl-4-(4-acetylphenyl)furan-2(5*H*)-one (±)-**11v**

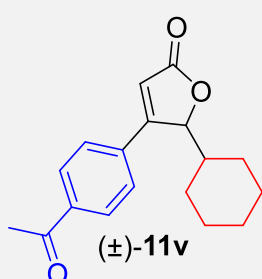

The general procedure for the synthesis of butenolides was followed as described using (±)-**S8** (1.16 g, 5.50 mmol, 1.0 eq.) in MeOH (10 mL), Cu(OAc)<sub>2</sub> (0.599 g, 3.3 mmol, 0.6 eq.) and 4-acetylphenyl boronic acid (2.71 g, 16.5 mmol, 3.0 eq.) in MeOH (30 mL). The crude sample of (±)-**11v** was obtained as a white solid (1.11 g, 3.90 mmol, 71% crude yield). **<sup>1</sup>H NMR** (400 MHz, CDCl<sub>3</sub>) δ 8.03-8.07 (m, 2H), 7.53-7.57 (m, 2H), 6.35 (d, *J* = 1.6 Hz, 1H), 5.42 (dd, *J* = 2.5, 1.6 Hz, 1H), 2.65 (s, 3H), 1.73-1.87 (m, 3H), 1.57-1.64 (m, 3H), 1.23-1.28 (m, 2H), 1.13-1.15 (m, 1H), 0.94-1.02 (m, 2H). **IR** (neat) *V*<sub>max</sub> (cm<sup>-1</sup>): 2923, 1719, 1685, 1263, 1179. **HRMS** (ESI): calc for C<sub>18</sub>H<sub>20</sub>O<sub>3</sub> *m/z*: 284.1412 found [M+H]<sup>+</sup> 285.1486.

### 5-ethyl-4,5-diphenylfuran-2(5*H*)-one (±)-**11w**

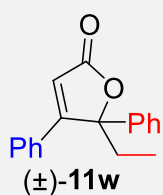

The general procedure for the synthesis of butenolides was followed as described using (±)-**S9** (1.28 g, 5.50 mmol, 1.0 eq.) in MeOH (10 mL), Cu(OAc)<sub>2</sub> (0.599 g, 3.3 mmol, 0.6 eq.) and phenyl boronic acid (2.01 g, 16.5 mmol, 3.0 eq.) in MeOH (30 mL). Purification by silica gel chromatography using 5-10% ethyl acetate in hexane produced (±)-**11w** as a white solid (0.81 g, 3.08 mmol, 56% yield). **<sup>1</sup>H NMR** (400 MHz, CDCl<sub>3</sub>) δ 7.42-7.44 (m, 1H), 7.40-7.42 (m, 1H), 7.38-7.40 (m, 2H), 7.36-7.38 (m, 2H), 7.29-7.33 (m, 2H), 7.21-7.23 (m, 2H), 6.45 (s, 1H), 2.65 (dq, *J* = 14.5, 7.3 Hz, 1H), 2.35 (dq, *J* = 14.5, 7.3 Hz, 1H), 0.88 (t, *J* = 7.3 Hz, 3H). **<sup>13</sup>C NMR** (101 MHz, CDCl<sub>3</sub>) δ 172.4, 169.3, 138.1, 130.9, 130.5, 129.1, 129.0, 127.8, 126.3, 116.4, 91.7, 27.9, 7.4. **IR** (neat)  $\nu_{\max}$  (cm<sup>-1</sup>): 1735, 1446, 1222, 1065. **HRMS** (ESI): calc for C<sub>18</sub>H<sub>16</sub>O<sub>2</sub> *m/z*: 264.1150 found [M+H]<sup>+</sup> 265.1224. **MP**: 115-117 °C.

## Synthesis of *cis*- $\beta$ -aryl, $\gamma$ -alkyl disubstituted $\gamma$ -butyrolactones (12a-12v)

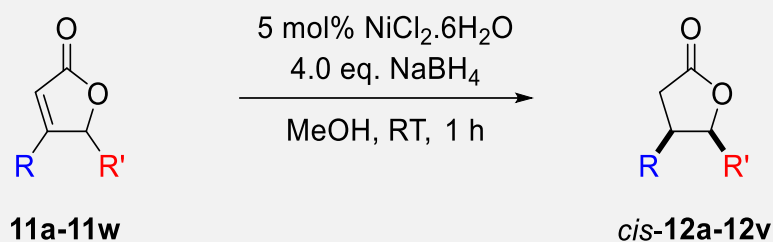

### General experimental procedure for the Nickel-hydride catalysed 1,4-reduction of $\beta$ -aryl, $\gamma$ -alkyl disubstituted $\alpha,\beta$ -unsaturated lactones.

$\text{NaBH}_4$  (113.5 mg, 3.00 mmol, 4 eq.) was added, all at once, to a stirring light-green solution of pre-mixed  $\text{NiCl}_2 \cdot 6\text{H}_2\text{O}$  (8.91 mg, 0.0375 mmol, 0.05 eq.) and butenolide (0.75 mmol, 1.0 eq.) in MeOH (10 mL) at room temperature. A vigorous effervescences occurred, and the resulting black solution was stirred at room temperature under the atmosphere of nitrogen till completion (between 0.5 h-1 h, TLC control). Afterwards, the mixture was diluted with EtOAc (30 mL) and poured into a separating funnel which contains saturated aqueous solution of ammonium chloride (20 mL). The aqueous layer was further extracted with EtOAc (10 mL). The combined organic layers were washed with brine (30 mL), dried with  $\text{MgSO}_4$ , filtered, and solvent removed *in vacuo* to generate the crude sample. Purification by silica gel chromatography using 5-25% EtOAc in hexanes furnished  $\beta$ -aryl,  $\gamma$ -alkyl disubstituted  $\gamma$ -butyrolactones.

**Note:** The reaction works well either under the atmosphere of nitrogen or air. Figure **S1** shows formation of the nickel boride in the absence of a butenolide. Figure **S2** is indicative of no reaction taking place (and no effervescence), due to lack of formation of the key Ni-H specie needed for the reaction to occur. Figure **S3** is a representation of the reaction progressing well, and no formation of nickel boride. No reaction occurred when butenolide was added to the vessel shown in figure S1.

**Fig S1:** NiCl<sub>2</sub>·6H<sub>2</sub>O (5 mol%) + NaBH<sub>4</sub> (4 eq.)  
in MeOH

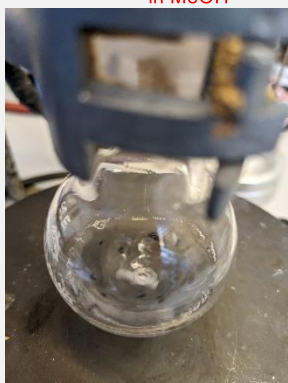

**Fig S3:** NiCl<sub>2</sub>·6H<sub>2</sub>O (5 mol%) + NaBH<sub>4</sub> (4 eq.)  
+ butenolide (1 eq.) in MeOH

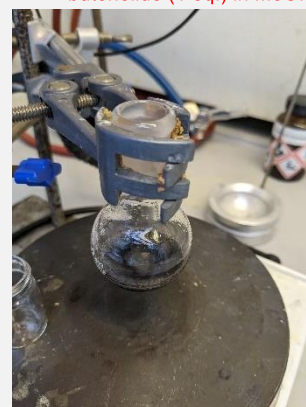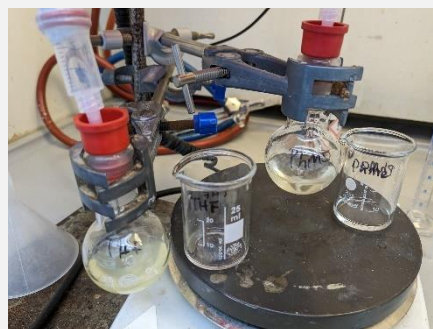

**Fig S2:** NiCl<sub>2</sub>·6H<sub>2</sub>O (5 mol%) + NaBH<sub>4</sub> (4 eq.)  
+ butenolide (1 eq.) in THF or PhMe

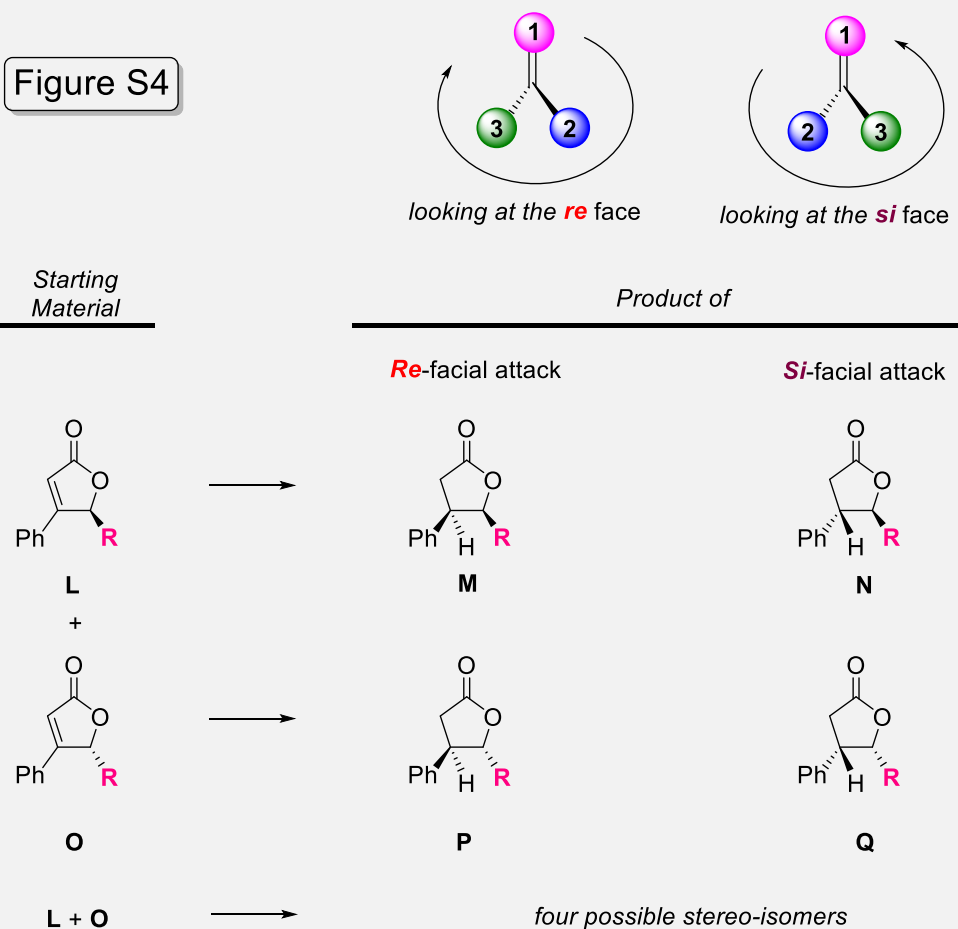

when **R** is small, *re-* and *si-*facial attack on **L**. Also, *re-* and *si-*facial attack on **O** = poor *dr*  
 when **R** is large, *re* face attack on **L**, but *si* face attack on **O** = excellent *dr*  
 when **R** is large, *hydride* is delivered opposite to **R**-group ONLY, therefore, **M** and **Q** are generated.  
**M** and **Q** are enantiomers

**Figure S5:** Observed trend in coupling constant. Aryl = Phenyl or substituted phenyl.

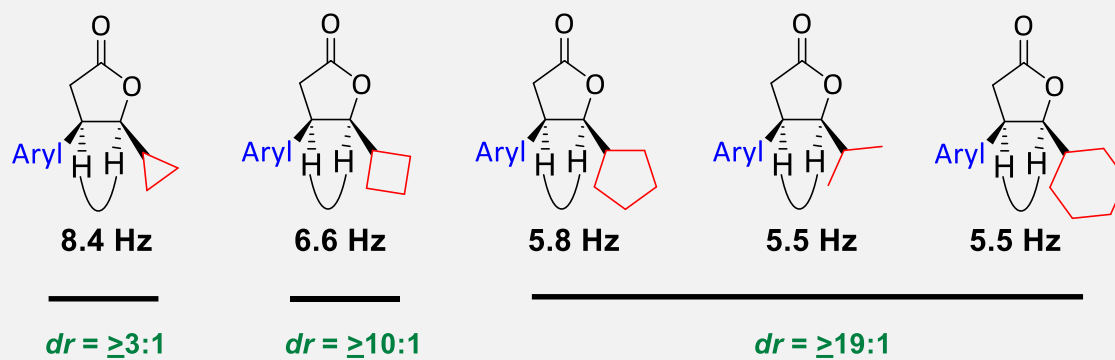

See page S105, S130 and S133 for NOESY for **12c**, **12g** and **12h** respectively.

### Dihydro-5-methyl-4-phenyl-2(3*H*)-furanone (±)-**12a**

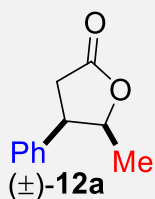

The general experimental procedure for the Nickel-hydride catalysed 1,4-reduction of  $\beta$ -aryl,  $\gamma$ -alkyl disubstituted  $\alpha,\beta$ -unsaturated lactones procedure was followed, using  $\text{NaBH}_4$  (113.5 mg, 3.00 mmol, 4 eq.),  $\text{NiCl}_2 \cdot 6\text{H}_2\text{O}$  (8.91 mg, 0.0375 mmol, 0.05 eq.), butenolide (±)-**11a** (130 mg, 0.75 mmol, 1.0 eq.) and MeOH (10 mL). Purification by silica gel chromatography using 5-10% EtOAc in hexanes furnished (±)-**12a** (79.3 mg, 0.45 mmol, 60%) as colourless oil.  **$^1\text{H NMR}$**  (400 MHz,  $\text{CDCl}_3$ )  $\delta$  7.33-7.38 (m, 2H), 7.28-7.32 (m, 1H), 7.12-7.15 (m, 2H), 4.93 (p,  $J = 6.6$  Hz, 1H), 3.76 (dt,  $J = 8.5, 6.6$  Hz, 1H), 2.95 (dd,  $J = 17.5, 8.5$  Hz, 1H), 2.83 (dd,  $J = 17.5, 6.6$  Hz, 1H), 1.01 (d,  $J = 6.6$  Hz, 3H).  **$^{13}\text{C NMR}$**  (101 MHz,  $\text{CDCl}_3$ )  $\delta$  176.7, 137.7, 128.9, 127.8, 127.7, 80.1, 44.9, 35.0, 16.8. The data obtained agrees with literature data.<sup>5a</sup>

### Dihydro-5-ethyl-4-phenyl-2(3*H*)-furanone (±)-**12b**

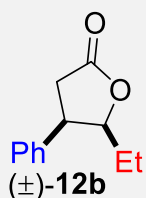

The general experimental procedure for the Nickel-hydride catalysed 1,4-reduction of  $\beta$ -aryl,  $\gamma$ -alkyl disubstituted  $\alpha,\beta$ -unsaturated lactones procedure was followed, using  $\text{NaBH}_4$  (113.5 mg, 3.00 mmol, 4 eq.),  $\text{NiCl}_2 \cdot 6\text{H}_2\text{O}$  (8.91 mg, 0.0375 mmol, 0.05 eq.), butenolide (±)-**11b** (140 mg, 0.75 mmol, 1.0 eq.) and MeOH (10 mL). Purification by silica gel chromatography using 5-10% EtOAc in hexanes furnished (±)-**12b** (88.5 mg, 0.46 mmol, 62%) as colourless oil.  **$^1\text{H NMR}$**  (400 MHz,  $\text{CDCl}_3$ )  $\delta$  7.32-7.36 (m, 2H), 7.27-7.31 (m, 1H), 7.12-7.15 (m, 2H), 4.63 (ddd,  $J = 9.3, 6.5, 4.6$  Hz, 1H), 3.74 (ddd,  $J = 8.6, 6.5, 4.9$  Hz, 1H), 2.98 (dd,  $J = 17.5, 8.6$  Hz, 1H), 2.77 (dd,  $J = 17.5, 4.9$  Hz, 1H), 1.32 (dt,  $J = 9.3, 7.4$  Hz, 1H), 1.19-1.24 (m, 1H), 0.90 (t,  $J = 7.4$  Hz, 3H).  **$^{13}\text{C NMR}$**  (101 MHz,  $\text{CDCl}_3$ )  $\delta$  176.9, 138.1, 128.9, 127.9, 127.7, 85.8, 44.6, 36.0, 24.6, 10.4. The data obtained agrees with literature data.<sup>5b</sup>



### Dihydro-5-(1-methylethyl)-4-phenyl-2(3*H*)-furanone (±)-**12c**

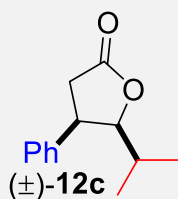

The general experimental procedure for the Nickel-hydride catalysed 1,4-reduction of  $\beta$ -aryl,  $\gamma$ -alkyl disubstituted  $\alpha,\beta$ -unsaturated lactones procedure was followed, using  $\text{NaBH}_4$  (113.5 mg, 3.00 mmol, 4 eq.),  $\text{NiCl}_2 \cdot 6\text{H}_2\text{O}$  (8.91 mg, 0.0375 mmol, 0.05 eq.), butenolide (±)-**11c** (150 mg, 0.75 mmol, 1.0 eq.) and MeOH (10 mL). Purification by silica gel chromatography using 5-10% EtOAc in hexanes furnished (±)-**12c** (125.6 mg, 0.62 mmol, 82%) as a white solid.  **$^1\text{H NMR}$**  (400 MHz,  $\text{CDCl}_3$ )  $\delta$  7.21-7.29 (m, 3H), 7.09-7.12 (m, 2H), 4.18 (dd,  $J = 10.1, 5.5$  Hz, 1H), 3.56 (ddd,  $J = 8.6, 5.5, 1.6$  Hz, 1H), 2.99 (dd,  $J = 17.5, 8.6$  Hz, 1H), 2.56 (dd,  $J = 17.5, 1.6$  Hz, 1H), 1.53 (dp,  $J = 10.1, 6.6$  Hz, 1H), 0.95 (d,  $J = 6.6$  Hz, 3H), 0.66 (d,  $J = 6.6$  Hz, 3H).  **$^{13}\text{C NMR}$**  (101 MHz,  $\text{CDCl}_3$ )  $\delta$  177.2, 139.2, 128.8, 128.1, 127.6, 90.1, 44.3, 38.8, 28.9, 20.0, 17.7. **IR** (neat)  $\nu_{\text{max}}$  ( $\text{cm}^{-1}$ ): 2967, 1764, 1468, 1140. **HRMS** (ESI): calc for  $\text{C}_{13}\text{H}_{16}\text{O}_2$   $m/z$ : 204.1150 found  $[\text{M}+\text{H}]^+$  205.1224. **MP**: 95-97°C.

### Dihydro-5-pentyl-4-phenyl-2(3*H*)-furanone (±)-**12d**

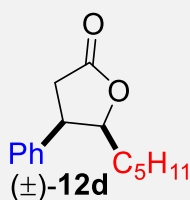

The general experimental procedure for the Nickel-hydride catalysed 1,4-reduction of  $\beta$ -aryl,  $\gamma$ -alkyl disubstituted  $\alpha,\beta$ -unsaturated lactones procedure was followed, using  $\text{NaBH}_4$  (113.5 mg, 3.00 mmol, 4 eq.),  $\text{NiCl}_2 \cdot 6\text{H}_2\text{O}$  (8.91 mg, 0.0375 mmol, 0.05 eq.), butenolide (±)-**11d** (170 mg, 0.75 mmol, 1.0 eq.) and MeOH (10 mL). Purification by silica gel chromatography using 5-10% EtOAc in hexanes furnished (±)-**12d** (106.3 mg, 0.45 mmol, 61%) as colourless oil.  **$^1\text{H NMR}$**  (400 MHz,  $\text{CDCl}_3$ )  $\delta$  7.32-7.36 (m, 2H), 7.27-7.30 (m, 1H), 7.12-7.15 (m, 2H), 4.71 (ddd,  $J = 9.0, 6.4, 4.2$  Hz, 1H), 3.72 (ddd,  $J = 8.6, 6.5, 4.9$  Hz, 1H), 2.97 (dd,  $J = 17.5, 8.6$  Hz, 1H), 2.77 (dd,  $J = 17.5, 4.9$  Hz, 1H), 1.22-1.44 (m, 1H), 1.11-1.20 (m, 1H), 0.81 (t,  $J = 7.0$  Hz, 3H).  **$^{13}\text{C NMR}$**  (101 MHz,  $\text{CDCl}_3$ )  $\delta$  177.0, 138.2, 128.9, 127.9, 127.7, 84.4, 44.7, 35.9, 31.5, 31.2, 25.6, 22.5, 14.0. The data obtained agrees with literature data.<sup>5c</sup>

### Dihydro-5-(cyclopropyl)-4-phenyl-2(3*H*)-furanone (±)-**12e**

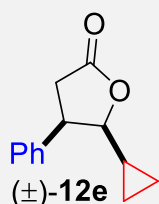

The general experimental procedure for the Nickel-hydride catalysed 1,4-reduction of  $\beta$ -aryl,  $\gamma$ -alkyl disubstituted  $\alpha,\beta$ -unsaturated lactones procedure was followed, using  $\text{NaBH}_4$  (113.5 mg, 3.00 mmol, 4 eq.),  $\text{NiCl}_2 \cdot 6\text{H}_2\text{O}$  (8.91 mg, 0.0375 mmol, 0.05 eq.), butenolide (±)-**11e** (150 mg, 0.75 mmol, 1.0 eq.) and MeOH (10 mL). Purification by silica gel chromatography using 5-10% EtOAc in hexanes furnished (±)-**12e** (91.0 mg, 0.45 mmol, 60%) as white solid.  **$^1\text{H NMR}$**  (400 MHz,  $\text{CDCl}_3$ )  $\delta$  7.33-7.37 (m, 2H), 7.27-7.32 (m, 1H), 7.21-7.23 (m, 2H), 4.01 (dd,  $J = 8.4, 6.6$  Hz, 1H), 3.79 (dd,  $J = 8.4, 5.6$  Hz, 1H), 2.95 (dd,  $J = 17.5, 8.4$  Hz, 1H), 2.86 (dd,  $J = 17.5, 5.6$  Hz, 1H), 0.47-0.57 (m, 2H), 0.40-0.46 (m, 1H), 0.27-0.34 (m, 1H), 0.10-0.17 (m, 1H).  **$^{13}\text{C NMR}$**  (101 MHz,  $\text{CDCl}_3$ )  $\delta$  176.8, 138.3, 128.8, 128.0, 127.6, 89.1, 44.9, 35.7, 11.5, 4.0, 2.3. **IR** (neat)  $\nu_{\text{max}}$  ( $\text{cm}^{-1}$ ): 2970, 1755, 1178, 1141. **HRMS** (ESI): calc for  $\text{C}_{13}\text{H}_{14}\text{O}_2$   $m/z$ : 202.0994 found  $[\text{M}+\text{H}]^+$  203.1068. **MP**: 105-107°C.

### Dihydro-5-(cyclobutyl)-4-phenyl-2(3*H*)-furanone (±)-**12f**

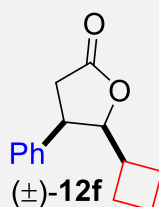

The general experimental procedure for the Nickel-hydride catalysed 1,4-reduction of  $\beta$ -aryl,  $\gamma$ -alkyl disubstituted  $\alpha,\beta$ -unsaturated lactones procedure was followed, using  $\text{NaBH}_4$  (113.5 mg, 3.00 mmol, 4 eq.),  $\text{NiCl}_2 \cdot 6\text{H}_2\text{O}$  (8.91 mg, 0.0375 mmol, 0.05 eq.), butenolide (±)-**11f** (160 mg, 0.75 mmol, 1.0 eq.) and MeOH (10 mL). Purification by silica gel chromatography using 5-10% EtOAc in hexanes furnished (±)-**12f** (126.5 mg, 0.59 mmol, 78%) as a white solid.  **$^1\text{H NMR}$**  (400 MHz,  $\text{CDCl}_3$ )  $\delta$  7.28-7.34 (m, 3H), 7.09-7.12 (m, 2H), 4.67 (dd,  $J = 8.6, 6.6$  Hz, 1H), 3.74 (ddd,  $J = 8.6, 6.6, 5.3$  Hz, 1H), 2.94 (dd,  $J = 17.5, 8.6$  Hz, 1H), 2.78 (dd,  $J = 17.5, 5.2$  Hz, 1H), 2.13-2.23 (m, 1H), 1.63-1.78 (m, 4H), 1.47-1.55 (m, 1H).  **$^{13}\text{C NMR}$**  (101 MHz,  $\text{CDCl}_3$ )  $\delta$  177.1, 137.9, 128.8, 127.8, 127.6, 87.7, 43.8, 36.0, 35.8, 25.0, 24.4, 18.5. **IR** (neat)  $\nu_{\text{max}}$  ( $\text{cm}^{-1}$ ): 2978, 1759, 1169, 1184. **HRMS** (ESI): calc for  $\text{C}_{14}\text{H}_{16}\text{O}_2$   $m/z$ : 216.1150 found  $[\text{M}+\text{H}]^+$  217.1224. **MP**: 55-57°C.

### Dihydro-5-(cyclopentyl)-4-phenyl-2(3*H*)-furanone (±)-**12g**

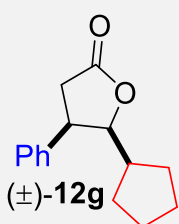

The general experimental procedure for the Nickel-hydride catalysed 1,4-reduction of  $\beta$ -aryl,  $\gamma$ -alkyl disubstituted  $\alpha,\beta$ -unsaturated lactones procedure was followed, using NaBH<sub>4</sub> (113.5 mg, 3.00 mmol, 4 eq.), NiCl<sub>2</sub>·6H<sub>2</sub>O (8.91 mg, 0.0375 mmol, 0.05 eq.), butenolide (±)-**11g** (170 mg, 0.75 mmol, 1.0 eq.) and MeOH (10 mL). Purification by silica gel chromatography using 5-10% EtOAc in hexanes furnished (±)-**12g** (150.3 mg, 0.65 mmol, 87%) as a white solid. **<sup>1</sup>H NMR** (400 MHz, CDCl<sub>3</sub>)  $\delta$  7.28-7.35 (m, 3H), 7.14-7.17 (m, 2H), 4.43 (dd,  $J$  = 10.0, 5.8 Hz, 1H), 3.64 (ddd,  $J$  = 8.6, 5.8, 2.4 Hz, 1H), 3.04 (dd,  $J$  = 17.5, 8.6 Hz, 1H), 2.69 (dd,  $J$  = 17.5, 2.4 Hz, 1H), 1.65-1.84 (m, 2H), 1.50-1.59 (m, 3H), 1.31-1.44 (m, 4H). **<sup>13</sup>C NMR** (101 MHz, CDCl<sub>3</sub>)  $\delta$  177.4, 139.3, 128.8, 128.2, 127.6, 89.3, 44.7, 40.3, 38.0, 30.9, 27.9, 25.6, 25.3. **IR** (neat)  $V_{\max}$  (cm<sup>-1</sup>): 2964, 1760, 1112, 1024. **HRMS** (ESI): calc for C<sub>15</sub>H<sub>18</sub>O<sub>2</sub> m/z: 230.1307 found [M+H]<sup>+</sup> 231.1381. **MP**: 75-77°C.

### Dihydro-5-(cyclohexyl)-4-phenyl-2(3*H*)-furanone (±)-**12h**

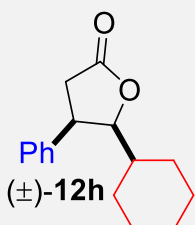

The general experimental procedure for the Nickel-hydride catalysed 1,4-reduction of  $\beta$ -aryl,  $\gamma$ -alkyl disubstituted  $\alpha,\beta$ -unsaturated lactones procedure was followed, using NaBH<sub>4</sub> (113.5 mg, 3.00 mmol, 4 eq.), NiCl<sub>2</sub>·6H<sub>2</sub>O (8.91 mg, 0.0375 mmol, 0.05 eq.), butenolide (±)-**11h** (180 mg, 0.75 mmol, 1.0 eq.) and MeOH (10 mL). Purification by silica gel chromatography using 5-10% EtOAc in hexanes furnished (±)-**12h** (168.6 mg, 0.69 mmol, 92%) as a white solid. **<sup>1</sup>H NMR** (400 MHz, CDCl<sub>3</sub>)  $\delta$  7.28-7.35 (m, 3H), 7.15-7.17 (m, 2H), 4.32 (dd,  $J$  = 9.9, 5.5 Hz, 1H), 3.62 (ddd,  $J$  = 8.5, 5.5, 1.7 Hz, 1H), 3.03 (dd,  $J$  = 17.4, 8.5 Hz, 1H), 2.61 (dd,  $J$  = 17.4, 1.7 Hz, 1H), 1.97-1.99 (m, 1H), 1.65-1.66 (m, 1H), 1.47-1.55 (m, 2H), 1.25-1.30 (m, 2H), 1.03-1.08 (m, 3H), 0.83-0.88 (m, 2H). **<sup>13</sup>C NMR** (101 MHz, CDCl<sub>3</sub>)  $\delta$  177.1, 139.1, 128.7, 127.9, 127.4, 88.7, 44.0, 38.5, 37.8, 29.9, 27.7, 26.1, 25.1, 25.0. **IR** (neat)  $V_{\max}$  (cm<sup>-1</sup>): 2926, 1760, 1112, 1078. **HRMS** (ESI): calc for C<sub>16</sub>H<sub>20</sub>O<sub>2</sub> m/z: 244.1463 found [M+H]<sup>+</sup> 245.1537. **MP**: 75-77°C.

### 5-isopropyl-4-(*m*-tolyl)dihydrofuran-2(3*H*)-one (±)-**12i**

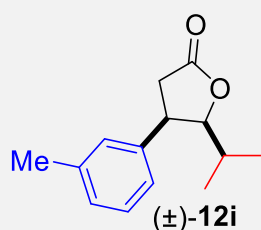

The general experimental procedure for the Nickel-hydride catalysed 1,4-reduction of  $\beta$ -aryl,  $\gamma$ -alkyl disubstituted  $\alpha,\beta$ -unsaturated lactones procedure was followed, using NaBH<sub>4</sub> (113.5 mg, 3.00 mmol, 4 eq.), NiCl<sub>2</sub>·6H<sub>2</sub>O (8.91 mg, 0.0375 mmol, 0.05 eq.), butenolide (±)-**11i** (160 mg, 0.75 mmol, 1.0 eq.) and MeOH (10 mL). Purification by silica gel chromatography using 5-10% EtOAc in hexanes furnished (±)-**12i** (144.1 mg, 0.66 mmol, 88%) as a white solid. **<sup>1</sup>H NMR** (400 MHz, CDCl<sub>3</sub>)  $\delta$  7.16-7.22 (m, 1H), 7.07-7.10 (m, 1H), 6.95-6.97 (m, 2H), 4.24 (dd,  $J$  = 10.1, 5.5 Hz, 1H), 3.58 (ddd,  $J$  = 8.6, 5.5, 1.7 Hz, 1H), 3.04 (dd,  $J$  = 17.5, 8.6 Hz, 1H), 2.61 (dd,  $J$  = 17.5, 1.7 Hz, 1H), 2.33 (s, 3H), 1.62 (dp,  $J$  = 10.1, 6.5 Hz, 1H), 1.02 (d,  $J$  = 6.5 Hz, 3H), 0.73 (d,  $J$  = 6.5 Hz, 3H). **<sup>13</sup>C NMR** (101 MHz, CDCl<sub>3</sub>)  $\delta$  177.3, 139.2, 138.5, 128.7, 128.3, 125.2, 90.1, 44.2, 38.8, 28.8, 21.6, 20.0, 17.8. **IR** (neat)  $\nu_{\max}$  (cm<sup>-1</sup>): 2961, 1774, 1473, 1141. **HRMS** (ESI): calc for C<sub>14</sub>H<sub>18</sub>O<sub>2</sub> m/z: 218.1307 found [M+H]<sup>+</sup> 219.1381. **MP**: 60-62 °C

### 4-(4-acetylphenyl)-5-isopropyldihydrofuran-2(3*H*)-one (±)-**12j**

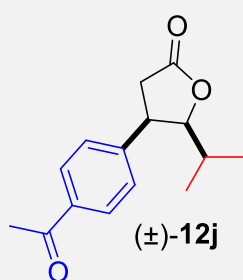

The general experimental procedure for the Nickel-hydride catalysed 1,4-reduction of  $\beta$ -aryl,  $\gamma$ -alkyl disubstituted  $\alpha,\beta$ -unsaturated lactones procedure was followed, using NaBH<sub>4</sub> (28.4 mg, 0.75 mmol, 1.0 eq.), NiCl<sub>2</sub>·6H<sub>2</sub>O (8.91 mg, 0.0375 mmol, 0.05 eq.), butenolide (±)-**11j** (180 mg, 0.75 mmol, 1.0 eq.) and MeOH (10 mL). Purification by silica gel chromatography using 10-20% EtOAc in hexanes furnished (±)-**12j** (110.8 mg, 0.45 mmol, 60%) as white solid. **<sup>1</sup>H NMR** (400 MHz, CDCl<sub>3</sub>)  $\delta$  7.92 (d,  $J$  = 8.4 Hz, 2H), 7.29 (d,  $J$  = 8.4 Hz, 2H), 4.27 (dd,  $J$  = 10.2, 5.5 Hz, 1H), 3.70 (ddd,  $J$  = 8.7, 5.5, 1.5 Hz, 1H), 3.09 (dd,  $J$  = 17.5, 8.6 Hz, 1H), 2.64 (dd,  $J$  = 17.5, 1.7 Hz, 1H), 2.60 (s, 3H), 1.56 (dp,  $J$  = 10.2, 6.5 Hz, 1H), 1.03 (d,  $J$  = 6.5 Hz, 3H), 0.72 (d,  $J$  = 6.5 Hz, 3H). **<sup>13</sup>C NMR** (101 MHz, CDCl<sub>3</sub>)  $\delta$  197.6, 176.7, 144.8, 136.7, 129.0, 128.5, 89.2, 44.4, 38.8, 29.0, 26.8, 20.1, 17.8. **IR** (neat)  $\nu_{\max}$  (cm<sup>-1</sup>): 2967, 1760, 1681, 1269, 1176. **HRMS** (ESI): calc for C<sub>15</sub>H<sub>18</sub>O<sub>3</sub> m/z: 246.1256 found [M+H]<sup>+</sup> 247.1330. **MP**: 150-152 °C

### 5-isopropyl-4-(naphthalen-1-yl)dihydrofuran-2(3H)-one (±)-**12k**

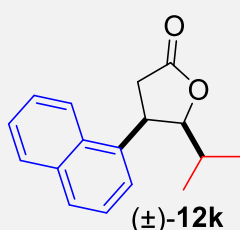

The general experimental procedure for the Nickel-hydride catalysed 1,4-reduction of  $\beta$ -aryl,  $\gamma$ -alkyl disubstituted  $\alpha,\beta$ -unsaturated lactones procedure was followed, using NaBH<sub>4</sub> (113.5 mg, 3.00 mmol, 4 eq.), NiCl<sub>2</sub>·6H<sub>2</sub>O (8.91 mg, 0.0375 mmol, 0.05 eq.), butenolide (±)-**11k** (190 mg, 0.75 mmol, 1.0 eq.) and MeOH (10 mL). Purification by silica gel chromatography using 5-10% EtOAc in hexanes furnished (±)-**12k** (182.5 mg, 0.72 mmol, 92%) as a white solid. **<sup>1</sup>H NMR** (400 MHz, CDCl<sub>3</sub>)  $\delta$  7.76–7.86 (m, 3H), 7.62 (d,  $J$  = 1.9 Hz, 1H), 7.44–7.55 (m, 2H), 7.30 (dd,  $J$  = 8.5, 1.9 Hz, 1H), 4.33 (dd,  $J$  = 10.1, 5.5 Hz, 1H), 3.81 (ddd,  $J$  = 8.6, 5.5, 1.7 Hz, 1H), 3.14 (dd,  $J$  = 17.5, 8.6 Hz, 1H), 2.71 (dd,  $J$  = 17.5, 1.7 Hz, 1H), 1.64 (dp,  $J$  = 10.1, 6.6 Hz, 1H), 1.03 (d,  $J$  = 6.6 Hz, 3H), 0.74 (d,  $J$  = 6.6 Hz, 3H). **<sup>13</sup>C NMR** (101 MHz, CDCl<sub>3</sub>)  $\delta$  177.2, 136.7, 133.3, 132.7, 128.7, 127.9, 127.7, 127.0, 126.6, 126.2, 125.9, 90.1, 44.5, 38.9, 29.0, 20.0, 17.9. **IR** (neat)  $\nu_{\max}$  (cm<sup>-1</sup>): 2970, 1761, 1412, 1174. **HRMS** (ESI): calc for C<sub>17</sub>H<sub>18</sub>O<sub>2</sub>  $m/z$ : 254.1307 found [M+H]<sup>+</sup> 255.1381. **MP**: 155-157 °C

### 4-(3-fluorophenyl)-5-isopropyldihydrofuran-2(3H)-one (±)-**12l**

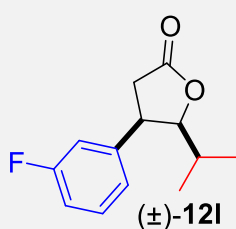

The general experimental procedure for the Nickel-hydride catalysed 1,4-reduction of  $\beta$ -aryl,  $\gamma$ -alkyl disubstituted  $\alpha,\beta$ -unsaturated lactones procedure was followed, using NaBH<sub>4</sub> (113.5 mg, 3.00 mmol, 4 eq.), NiCl<sub>2</sub>·6H<sub>2</sub>O (8.91 mg, 0.0375 mmol, 0.05 eq.), butenolide (±)-**11l** (170 mg, 0.75 mmol, 1.0 eq.) and MeOH (10 mL). Purification by silica gel chromatography using 5-10% EtOAc in hexanes furnished (±)-**12l** (151.7 mg, 0.68 mmol, 91%) as a white solid. **<sup>1</sup>H NMR** (400 MHz, CDCl<sub>3</sub>)  $\delta$  7.30 (td,  $J$  = 8.0, 6.0 Hz, 1H), 6.93–7.02 (m, 2H), 6.89 (dt,  $J$  = 9.7, 2.1 Hz, 1H), 4.24 (dd,  $J$  = 10.1, 5.5 Hz, 1H), 3.62 (ddd,  $J$  = 8.6, 5.5, 1.6 Hz, 1H), 3.06 (dd,  $J$  = 17.5, 8.6 Hz, 1H), 2.61 (dd,  $J$  = 17.5, 1.6 Hz, 1H), 1.62 (dp,  $J$  = 10.1, 6.6 Hz, 1H), 1.03 (d,  $J$  = 6.6 Hz, 3H), 0.74 (d,  $J$  = 6.6 Hz, 3H). **<sup>13</sup>C NMR** (101 MHz, CDCl<sub>3</sub>)  $\delta$  176.7, 162.9 (d,  $J_{C-F}$  = 247.0 Hz, 1C), 141.7 (d,  $J_{C-F}$  = 7.0 Hz, 1C), 130.5 (d,  $J_{C-F}$  = 8.4 Hz, 1C), 123.7 (d,  $J_{C-F}$  = 2.9 Hz, 1C), 115.2 (d,  $J_{C-F}$  = 21.7 Hz, 1C), 114.7 (d,  $J_{C-F}$  = 21.0 Hz, 1C), 89.7, 44.1 (d,  $J_{C-F}$  = 1.7 Hz, 1C), 38.7, 28.8, 20.0, 17.8. **<sup>19</sup>F NMR** (377 MHz, CDCl<sub>3</sub>)  $\delta$  -112.0. **IR** (neat)  $\nu_{\max}$  (cm<sup>-1</sup>): 2930, 1748, 1487, 1170. **HRMS** (ESI): calc for C<sub>13</sub>H<sub>15</sub>FO<sub>2</sub>  $m/z$ : 222.1056 found [M+H]<sup>+</sup> 223.1130. **MP**: 71-73 °C

#### 4-(4-fluorophenyl)-5-isopropylidihydrofuran-2(3*H*)-one (±)-**12m**

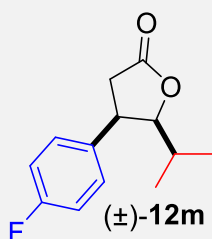

The general experimental procedure for the Nickel-hydride catalysed 1,4-reduction of  $\beta$ -aryl,  $\gamma$ -alkyl disubstituted  $\alpha,\beta$ -unsaturated lactones procedure was followed, using  $\text{NaBH}_4$  (113.5 mg, 3.00 mmol, 4 eq.),  $\text{NiCl}_2 \cdot 6\text{H}_2\text{O}$  (8.91 mg, 0.0375 mmol, 0.05 eq.), butenolide (±)-**11m** (170 mg, 0.75 mmol, 1.0 eq.) and MeOH (10 mL). Purification by silica gel chromatography using 5-10% EtOAc in hexanes furnished (±)-**12m** (156.7 mg, 0.71 mmol, 94%) as white solid.  **$^1\text{H NMR}$**  (400 MHz,  $\text{CDCl}_3$ )  $\delta$  7.12-7.17 (m, 2H), 6.99-7.04 (m, 2H), 4.23 (dd,  $J = 10.2, 5.4$  Hz, 1H), 3.62 (ddd,  $J = 8.6, 5.4, 1.5$  Hz, 1H), 3.06 (dd,  $J = 17.5, 8.6$  Hz, 1H), 2.58 (dd,  $J = 17.5, 1.5$  Hz, 1H), 1.51-1.64 (m, 1H), 1.03 (d,  $J = 6.5$  Hz, 3H), 0.72 (d,  $J = 6.6$  Hz, 3H).  **$^{13}\text{C NMR}$**  (101 MHz,  $\text{CDCl}_3$ )  $\delta$  176.9, 162.2 (d,  $J_{\text{C-F}} = 246.6$  Hz, 1C), 135.0 (d,  $J_{\text{C-F}} = 3.4$  Hz, 1C), 129.6 (d,  $J_{\text{C-F}} = 7.9$  Hz, 1C), 115.8 (d,  $J_{\text{C-F}} = 21.3$  Hz, 1C), 89.9, 43.6, 39.0, 28.8, 20.0, 17.6.  **$^{19}\text{F NMR}$**  (377 MHz,  $\text{CDCl}_3$ )  $\delta$  -114.6. **IR** (neat)  $\nu_{\text{max}}$  ( $\text{cm}^{-1}$ ): 2974, 1751, 1506, 1204, 1160. **HRMS** (ESI): calc for  $\text{C}_{13}\text{H}_{15}\text{FO}_2$   $m/z$ : 222.1056 found  $[\text{M}+\text{H}]^+$  223.1130. **MP**: 81-83 °C

#### 5-isopropyl-4-(4-methoxyphenyl)dihydrofuran-2(3*H*)-one (±)-**12n**

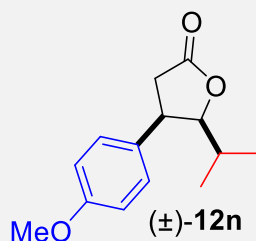

The general experimental procedure for the Nickel-hydride catalysed 1,4-reduction of  $\beta$ -aryl,  $\gamma$ -alkyl disubstituted  $\alpha,\beta$ -unsaturated lactones procedure was followed, using  $\text{NaBH}_4$  (113.5 mg, 3.00 mmol, 4 eq.),  $\text{NiCl}_2 \cdot 6\text{H}_2\text{O}$  (8.91 mg, 0.0375 mmol, 0.05 eq.), butenolide (±)-**11n** (170 mg, 0.75 mmol, 1.0 eq.) and MeOH (10 mL). Purification by silica gel chromatography using 10-15% EtOAc in hexanes furnished (±)-**12n** (166.9 mg, 0.71 mmol, 95%) as a white solid.  **$^1\text{H NMR}$**  (400 MHz,  $\text{CDCl}_3$ )  $\delta$  7.08 (d,  $J = 8.8$  Hz, 2H), 6.85 (d,  $J = 8.8$  Hz, 2H), 4.21 (dd,  $J = 10.1, 5.5$  Hz, 1H), 3.80 (s, 3H), 3.58 (ddd,  $J = 8.6, 5.5, 1.6$  Hz, 1H), 3.03 (dd,  $J = 17.4, 8.6$  Hz, 1H), 2.58 (dd,  $J = 17.4, 1.6$  Hz, 1H), 1.59 (dp,  $J = 10.1, 6.6$  Hz, 1H), 1.01 (d,  $J = 6.6$  Hz, 3H), 0.72 (d,  $J = 6.6$  Hz, 3H).  **$^{13}\text{C NMR}$**  (101 MHz,  $\text{CDCl}_3$ )  $\delta$  177.4, 159.0, 131.2, 129.1, 114.2, 90.3, 55.3, 43.5, 39.0, 28.9, 20.0, 17.7. **IR** (neat)  $\nu_{\text{max}}$  ( $\text{cm}^{-1}$ ): 2988, 1759, 1514, 1174. **HRMS** (ESI): calc for  $\text{C}_{14}\text{H}_{18}\text{O}_3$   $m/z$ : 234.1256 found  $[\text{M}+\text{H}]^+$  235.1130. **MP**: 97-99 °C

### 5-cyclopropyl-4-(*m*-tolyl)dihydrofuran-2(3*H*)-one (±)-**12o**

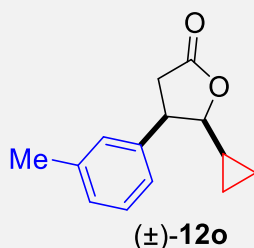

The general experimental procedure for the Nickel-hydride catalysed 1,4-reduction of  $\beta$ -aryl,  $\gamma$ -alkyl disubstituted  $\alpha,\beta$ -unsaturated lactones procedure was followed, using  $\text{NaBH}_4$  (113.5 mg, 3.00 mmol, 4 eq.),  $\text{NiCl}_2 \cdot 6\text{H}_2\text{O}$  (8.91 mg, 0.0375 mmol, 0.05 eq.), butenolide (±)-**11o** (160 mg, 0.75 mmol, 1.0 eq.) and MeOH (10 mL). Purification by silica gel chromatography using 5-10% EtOAc in hexanes furnished (±)-**12o** (100.6 mg, 0.47 mmol, 62%) as colourless oil.  **$^1\text{H NMR}$**  (400 MHz,  $\text{CDCl}_3$ )  $\delta$  7.21-7.25 (m, 1H), 7.09-7.11 (m, 1H), 7.00-7.03 (m, 2H), 3.96-4.03 (m, 1H), 3.75 (ddd,  $J = 8.4, 6.5, 5.2$  Hz, 1H), 2.93 (dd,  $J = 17.5, 8.4$  Hz, 1H), 2.84 (dd,  $J = 17.5, 5.2$  Hz, 1H), 2.35 (s, 3H), 0.83-0.95 (m, 1H), 0.48-0.57 (m, 2H), 0.40-0.46 (m, 1H), 0.28-0.35 (m, 1H), 0.11-0.17 (m, 1H).  **$^{13}\text{C NMR}$**  (101 MHz,  $\text{CDCl}_3$ )  $\delta$  177.0, 138.47, 138.40, 128.6, 128.3, 125.1, 89.2, 44.9, 35.8, 21.6, 11.4, 4.0, 2.3. **IR** (neat)  $V_{\text{max}}$  ( $\text{cm}^{-1}$ ): 2922, 1769, 1163. **HRMS** (ESI): calc for  $\text{C}_{14}\text{H}_{16}\text{O}_2$   $m/z$ : 216.1150 found  $[\text{M}+\text{H}]^+$  217.1224.

### 5-cyclobutyl-4-(*m*-tolyl)dihydrofuran-2(3*H*)-one (±)-**12p**

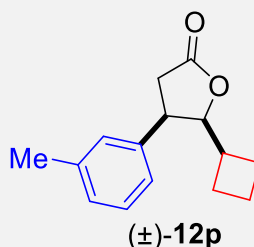

The general experimental procedure for the Nickel-hydride catalysed 1,4-reduction of  $\beta$ -aryl,  $\gamma$ -alkyl disubstituted  $\alpha,\beta$ -unsaturated lactones procedure was followed, using  $\text{NaBH}_4$  (113.5 mg, 3.00 mmol, 4 eq.),  $\text{NiCl}_2 \cdot 6\text{H}_2\text{O}$  (8.91 mg, 0.0375 mmol, 0.05 eq.), butenolide (±)-**11p** (170 mg, 0.75 mmol, 1.0 eq.) and MeOH (10 mL). Purification by silica gel chromatography using 5-10% EtOAc in hexanes furnished (±)-**12p** (108.8 mg, 0.47 mmol, 63%) as colourless oil.  **$^1\text{H NMR}$**  (400 MHz,  $\text{CDCl}_3$ )  $\delta$  7.18-7.22 (m, 1H), 7.07-7.10 (m, 1H), 6.89-6.91 (m, 2H), 4.66 (dd,  $J = 8.6, 6.6$  Hz, 1H), 3.70 (ddd,  $J = 8.6, 6.6, 5.2$  Hz, 1H), 2.92 (dd,  $J = 17.5, 8.6$  Hz, 1H), 2.76 (dd,  $J = 17.5, 5.2$  Hz, 1H), 2.33 (s, 3H), 2.14-2.24 (m, 1H), 1.81-1.90 (m, 1H), 1.65-1.78 (m, 4H), 1.52-1.56 (m, 1H).  **$^{13}\text{C NMR}$**  (101 MHz,  $\text{CDCl}_3$ )  $\delta$  177.2, 138.4, 137.8, 128.6, 128.5, 128.3, 124.9, 87.8, 43.7, 36.0, 35.8, 25.1, 24.4, 21.5, 18.5. **IR** (neat)  $V_{\text{max}}$  ( $\text{cm}^{-1}$ ): 2936, 1772, 1165. **HRMS** (ESI): calc for  $\text{C}_{15}\text{H}_{18}\text{O}_2$   $m/z$ : 230.1307 found  $[\text{M}+\text{H}]^+$  231.1381.

### 5-cyclopentyl-4-(4-methoxyphenyl)dihydrofuran-2(3H)-one (±)-**12q**

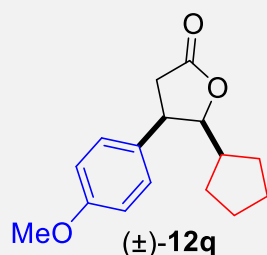

The general experimental procedure for the Nickel-hydride catalysed 1,4-reduction of  $\beta$ -aryl,  $\gamma$ -alkyl disubstituted  $\alpha,\beta$ -unsaturated lactones procedure was followed, using  $\text{NaBH}_4$  (113.5 mg, 3.00 mmol, 4 eq.),  $\text{NiCl}_2 \cdot 6\text{H}_2\text{O}$  (8.91 mg, 0.0375 mmol, 0.05 eq.), butenolide (±)-**11q** (190 mg, 0.75 mmol, 1.0 eq.) and MeOH (10 mL). Purification by silica gel chromatography using 10-15% EtOAc in hexanes furnished (±)-**12q** (173.8 mg, 0.67 mmol, 89%) as a white solid.  **$^1\text{H NMR}$**  (400 MHz,  $\text{CDCl}_3$ )  $\delta$  7.07 (d,  $J = 8.8$  Hz, 2H), 6.85 (d,  $J = 8.8$  Hz, 2H), 4.39 (dd,  $J = 9.9, 5.7$  Hz, 1H), 3.80 (s, 3H), 3.59 (ddd,  $J = 8.4, 5.7, 2.4$  Hz, 1H), 3.01 (dd,  $J = 17.5, 8.4$  Hz, 1H), 2.64 (dd,  $J = 17.5, 2.4$  Hz, 1H), 1.74–1.84 (m, 1H), 1.67–1.73 (m, 1H), 1.47–1.60 (m, 2H), 1.31–1.45 (m, 4H), 1.02–1.09 (m, 1H).  **$^{13}\text{C NMR}$**  (101 MHz,  $\text{CDCl}_3$ )  $\delta$  177.5, 159.0, 131.2, 129.1, 114.1, 89.5, 55.3, 43.9, 40.3, 38.1, 30.9, 27.9, 25.6, 25.3. **IR** (neat)  $V_{\text{max}}$  ( $\text{cm}^{-1}$ ): 2954, 1740, 1512, 1179. **HRMS** (ESI): calc for  $\text{C}_{16}\text{H}_{20}\text{O}_3$   $m/z$ : 260.1412 found  $[\text{M}+\text{H}]^+$  261.1486. **MP**: 93–95°C

### 5-cyclohexyl-4-(naphthalen-1-yl)dihydrofuran-2(3H)-one (±)-**12r**

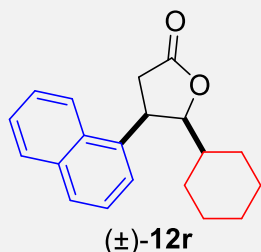

The general experimental procedure for the Nickel-hydride catalysed 1,4-reduction of  $\beta$ -aryl,  $\gamma$ -alkyl disubstituted  $\alpha,\beta$ -unsaturated lactones procedure was followed, using  $\text{NaBH}_4$  (113.5 mg, 3.00 mmol, 4 eq.),  $\text{NiCl}_2 \cdot 6\text{H}_2\text{O}$  (8.91 mg, 0.0375 mmol, 0.05 eq.), butenolide (±)-**11r** (220 mg, 0.75 mmol, 1.0 eq.) and MeOH (10 mL). Purification by silica gel chromatography using 5-10% EtOAc in hexanes furnished (±)-**12r** (214.2 mg, 0.73 mmol, 97%) as white solid.  **$^1\text{H NMR}$**  (400 MHz,  $\text{CDCl}_3$ )  $\delta$  7.80–7.85 (m, 3H), 7.61–7.62 (m, 1H), 7.46–7.53 (m, 2H), 7.30 (dd,  $J = 8.5, 1.9$  Hz, 1H), 4.40 (dd,  $J = 10.0, 5.5$  Hz, 1H), 3.80 (ddd,  $J = 8.5, 5.5, 1.7$  Hz, 1H), 3.11 (dd,  $J = 17.5, 8.5$  Hz, 1H), 2.68 (dd,  $J = 17.5, 1.7$  Hz, 1H), 2.01–2.04 (m, 1H), 1.63–1.65 (m, 1H), 1.50–1.54 (m, 3H), 1.31–1.41 (m, 1H), 1.00–1.14 (m, 3H), 0.74–0.94 (m, 2H).  **$^{13}\text{C NMR}$**  (101 MHz,  $\text{CDCl}_3$ )  $\delta$  177.2, 136.8, 133.4, 132.7, 128.7, 127.9, 127.8, 126.9, 126.5, 126.2, 126.0, 88.9, 44.3, 38.8, 38.0, 30.1, 27.9, 26.2, 25.17, 25.12. **IR** (neat)  $V_{\text{max}}$  ( $\text{cm}^{-1}$ ): 2936, 1770, 1180. **HRMS** (ESI): calc for  $\text{C}_{20}\text{H}_{22}\text{O}_2$   $m/z$ : 294.1620 found  $[\text{M}+\text{H}]^+$  295.1694. **MP**: 135–137°C



### 5-cyclohexyl-4-(3-fluorophenyl)dihydrofuran-2(3H)-one (±)-**12s**

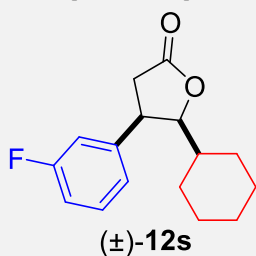

The general experimental procedure for the Nickel-hydride catalysed 1,4-reduction of  $\beta$ -aryl,  $\gamma$ -alkyl disubstituted  $\alpha,\beta$ -unsaturated lactones procedure was followed, using  $\text{NaBH}_4$  (113.5 mg, 3.00 mmol, 4 eq.),  $\text{NiCl}_2 \cdot 6\text{H}_2\text{O}$  (8.91 mg, 0.0375 mmol, 0.05 eq.), butenolide (±)-**11s** (200 mg, 0.75 mmol, 1.0 eq.) and MeOH (10 mL). Purification by silica gel chromatography using 5-10% EtOAc in hexanes furnished (±)-**12s** (186.9 mg, 0.71 mmol, 95%) as white solid.  **$^1\text{H NMR}$**  (400 MHz,  $\text{CDCl}_3$ )  $\delta$  7.27-7.33 (m, 1H), 6.94-7.01 (m, 2H), 6.87-6.90 (m, 1H), 4.31 (dd,  $J = 10.0, 5.5$  Hz, 1H), 3.62 (ddd,  $J = 8.5, 5.5, 1.8$  Hz, 1H), 3.03 (dd,  $J = 17.5, 8.5$  Hz, 1H), 2.58 (dd,  $J = 17.4, 1.8$  Hz, 1H), 1.95-2.01 (m, 1H), 1.66-1.69 (m, 1H), 1.43-1.60 (m, 3H), 1.30-1.35 (m, 1H), 0.99-1.14 (m, 3H), 0.81-0.94 (m, 2H).  **$^{13}\text{C NMR}$**  (101 MHz,  $\text{CDCl}_3$ )  $\delta$  176.5, 162.9 (d,  $J_{\text{C-F}} = 246.9$  Hz, 1C), 141.7 (d,  $J_{\text{C-F}} = 7.0$  Hz, 1C), 130.5 (d,  $J_{\text{C-F}} = 8.3$  Hz, 1C), 123.7 (d,  $J_{\text{C-F}} = 2.9$  Hz, 1C), 115.8 (d,  $J_{\text{C-F}} = 21.7$  Hz, 1C), 114.6 (d,  $J_{\text{C-F}} = 20.9$  Hz, 1C), 88.5, 43.99, 43.98, 38.5, 37.9, 30.1, 27.8, 26.2, 25.2.  **$^{19}\text{F NMR}$**  (377 MHz,  $\text{CDCl}_3$ )  $\delta$  -112.0. **IR** (neat)  $\nu_{\text{max}}$  ( $\text{cm}^{-1}$ ): 2927, 1755, 1588, 1194. **HRMS** (ESI): calc for  $\text{C}_{16}\text{H}_{19}\text{FO}_2$   $m/z$ : 262.1369 found  $[\text{M}+\text{H}]^+$  263.1443. **MP**: 96-98°C

### 5-cyclohexyl-4-(*m*-tolyl)dihydrofuran-2(3H)-one (±)-**12t**

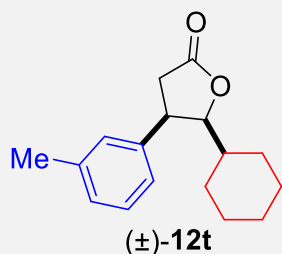

The general experimental procedure for the Nickel-hydride catalysed 1,4-reduction of  $\beta$ -aryl,  $\gamma$ -alkyl disubstituted  $\alpha,\beta$ -unsaturated lactones procedure was followed, using  $\text{NaBH}_4$  (113.5 mg, 3.00 mmol, 4 eq.),  $\text{NiCl}_2 \cdot 6\text{H}_2\text{O}$  (8.91 mg, 0.0375 mmol, 0.05 eq.), butenolide (±)-**11t** (190 mg, 0.75 mmol, 1.0 eq.) and MeOH (10 mL). Purification by silica gel chromatography using 5-10% EtOAc in hexanes furnished (±)-**12t** (180.2 mg, 0.69 mmol, 93%) as colourless oil.  **$^1\text{H NMR}$**  (400 MHz,  $\text{CDCl}_3$ )  $\delta$  7.19-7.25 (m, 1H), 7.09-7.13 (m, 1H), 6.97-6.99 (m, 2H), 4.33 (dd,  $J = 9.9, 5.5$  Hz, 1H), 3.60 (ddd,  $J = 8.5, 5.5, 1.8$  Hz, 1H), 3.03 (dd,  $J = 17.4, 8.5$  Hz, 1H), 2.62 (dd,  $J = 17.4, 1.8$  Hz, 1H), 2.36 (s, 3H), 2.00-2.02 (m, 1H), 1.65-1.69 (m, 1H), 1.50-1.59 (m, 3H), 1.31-1.41 (m, 1H), 1.03-1.14 (m, 3H), 0.82-0.97 (m, 2H).  **$^{13}\text{C NMR}$**  (101 MHz,  $\text{CDCl}_3$ )  $\delta$  177.4, 139.2, 138.5, 128.69, 128.63, 128.3, 125.2, 88.8, 44.1, 38.6, 37.9, 30.1, 27.9, 26.2, 25.2, 25.1, 21.6. **IR** (neat)  $\nu_{\text{max}}$  ( $\text{cm}^{-1}$ ): 2922, 1773, 1179. **HRMS** (ESI): calc for  $\text{C}_{17}\text{H}_{22}\text{O}_2$   $m/z$ : 258.1620 found  $[\text{M}+\text{H}]^+$  259.1694.

### 5-cyclohexyl-4-(4-methoxyphenyl)dihydrofuran-2(3H)-one (±)-**12u**

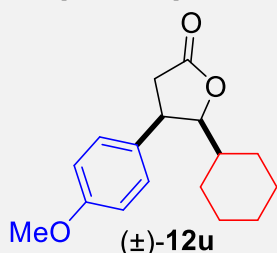

The general experimental procedure for the Nickel-hydride catalysed 1,4-reduction of  $\beta$ -aryl,  $\gamma$ -alkyl disubstituted  $\alpha,\beta$ -unsaturated lactones procedure was followed, using NaBH<sub>4</sub> (113.5 mg, 3.00 mmol, 4 eq.), NiCl<sub>2</sub>·6H<sub>2</sub>O (8.91 mg, 0.0375 mmol, 0.05 eq.), butenolide (±)-**11u** (200 mg, 0.75 mmol, 1.0 eq.) and MeOH (10 mL). Purification by silica gel chromatography using 10-15% EtOAc in hexanes furnished (±)-**12u** (197.5 mg, 0.72 mmol, 96%) as yellow solid. **<sup>1</sup>H NMR** (400 MHz, CDCl<sub>3</sub>)  $\delta$  7.07 (d,  $J$  = 8.8 Hz, 2H), 6.85 (d,  $J$  = 8.8 Hz, 2H), 4.28 (dd,  $J$  = 10.0, 5.4 Hz, 1H), 3.81 (s, 3H), 3.57 (ddd,  $J$  = 8.5, 5.5, 1.7 Hz, 1H), 3.00 (dd,  $J$  = 17.4, 8.5 Hz, 1H), 2.56 (dd,  $J$  = 17.4, 1.7 Hz, 1H), 1.96-1.99 (m, 1H), 1.61-1.67 (m, 1H), 1.46-1.57 (m, 3H), 1.25-1.32 (m, 1H), 1.03-1.12 (m, 3H), 0.82-0.91 (m, 2H). **<sup>13</sup>C NMR** (101 MHz, CDCl<sub>3</sub>)  $\delta$  177.4, 158.9, 131.2, 129.0, 114.1, 89.0, 55.3, 43.4, 38.8, 37.9, 30.0, 27.8, 26.2, 25.27, 25.22. **IR** (neat)  $V_{\max}$  (cm<sup>-1</sup>): 2930, 1758, 1511, 1179. **HRMS** (ESI): calc for C<sub>17</sub>H<sub>22</sub>O<sub>3</sub>  $m/z$ : 274.1569 found [M+H]<sup>+</sup> 275.1643. **MP**: 102-104 °C

### 5-cyclohexyl-4-(4-(1-hydroxyethyl)phenyl)dihydrofuran-2(3H)-one (±)-**12v**

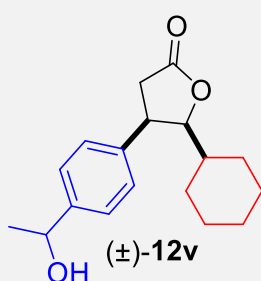

The general experimental procedure for the Nickel-hydride catalysed 1,4-reduction of  $\beta$ -aryl,  $\gamma$ -alkyl disubstituted  $\alpha,\beta$ -unsaturated lactones procedure was followed, using NaBH<sub>4</sub> (113.5 mg, 3.00 mmol, 4 eq.), NiCl<sub>2</sub>·6H<sub>2</sub>O (8.91 mg, 0.0375 mmol, 0.05 eq.), butenolide (±)-**11v** (210 mg, 0.75 mmol, 1.0 eq.) and MeOH (10 mL). Purification by silica gel chromatography using 15-25% EtOAc in hexanes furnished (±)-**12v** (95.2 mg, 0.33 mmol, 44%) as a white solid. **<sup>1</sup>H NMR** (400 MHz, CDCl<sub>3</sub>)  $\delta$  7.32 (d,  $J$  = 8.3 Hz, 2H), 7.15 (d,  $J$  = 8.3 Hz, 2H), 4.91 (qd,  $J$  = 6.5, 2.0 Hz, 1H), 4.31 (dd,  $J$  = 10.0, 5.4 Hz, 1H), 3.61 (ddd,  $J$  = 8.5, 5.4, 1.6 Hz, 1H), 3.02 (dd,  $J$  = 17.4, 8.5 Hz, 1H), 2.58 (dd,  $J$  = 17.4, 1.7 Hz, 1H), 1.98-2.04 (m, 1H), 1.65-1.67 (m, 1H), 1.49-1.56 (m, 3H), 1.50 (d,  $J$  = 6.5 Hz, 3H), 1.28-1.34 (m, 1H), 1.04-1.13 (m, 3H), 0.86-0.91 (m, 2H). **<sup>13</sup>C NMR** (101 MHz, CDCl<sub>3</sub>)  $\delta$  177.2, 145.1, 138.4, 128.2, 125.9, 88.8, 70.1, 43.9, 38.7, 37.9, 37.8, 30.1, 27.8, 26.2, 25.3, 25.2. **IR** (neat)  $V_{\max}$  (cm<sup>-1</sup>): 3274, 2924, 1754, 1189. **HRMS** (ESI): calc for C<sub>18</sub>H<sub>24</sub>O<sub>3</sub>  $m/z$ : 288.1725 found [M+H]<sup>+</sup> 289.1799. **MP**: 72-74 °C

## References:

1. (a) M. M. Midland, A. Tramontano, and J. R. Cable, Synthesis of alkyl 4-hydroxy-2-alkynoates, *J. Org. Chem.* 1980, **45**, 28–29. (b) B. M. Trost, Z. T. Ball, and T. Jöge, A chemoselective reduction of alkynes to (*E*)-alkenes, *J. Am. Chem. Soc.* 2002, **124**, 7922–7923.
2. (a) V. Hanchate, A. Kumar, and K. R. Prabhu, Synthesis of naphthols by Rh(III)-catalysed domino C–H activation, annulation, and lactonisation using sulfoxonium ylide as a traceless directing group, *Org. Lett.* 2019, **21**, 8424–8428. (b) B. M. Trost, T. J. J. Miiller, and J. Martinez, Ruthenium-catalysed synthesis of butenolides and pentenolides *via* contra-electronic  $\alpha$ -alkylation of hydroxyalkynoates, *J. Am. Chem. Soc.* 1995, **117**, 1888–1899.
3. (a) K. Villeneuve and W. Tam, Construction of isochromenes *via* a Ruthenium-catalysed reaction of oxabenzonorbornenes with propargylic alcohols, *Organometallics* 2007, **26**, 6082–6090. (b) A. Kumar and K. R. Prabhu, Rhodium(III)-catalysed C–H activation: A cascade approach for the regioselective synthesis of fused heterocyclic lactone scaffolds, *J. Org. Chem.* 2020, **85**, 3548–3559.
4. (a) C. Gronnier, S. Kramer, Y. Odabachian, and F. Gagosz, Cu(I)-catalysed oxidative cyclisation of alkynyl oxiranes and oxetanes, *J. Am. Chem. Soc.* 2012, **134**, 828–831. (b) E. Krawczyk, M. Koprowski, J. Łuczak, A stereoselective approach to optically active butenolides by Horner–Wadsworth–Emmons olefination reaction of  $\alpha$ -hydroxy ketones, *Tetrahedron: Asymmetry* 2007, **18**, 1780–1787 (c) H. Zheng, Y. Fan, Y. Song, J. Chen, E. You, S. Labalme, and W. Lin, Site isolation in metal-organic layers enhances photoredox Gold catalysis, *J. Am. Chem. Soc.* 2022, **144**, 10694–10699 (d) J. L. Nallasivam and R. A. Fernandes, A protecting-group-free synthesis of (+)-nephrosteranic, (+)-protolichesterinic, (+)-nephrosterinic, (+)-phaseolinic, (+)-rocellaric acids and (+)-methylenolactocin, *Org. Biomol. Chem.*, 2017, **15**, 708–716.
5. (a) H. Xie, J. Lua, Y. Guia, L. Gao, Z. Song,  $(\text{HMe}_2\text{SiCH}_2)_2$ : a useful reagent for  $\text{B}(\text{C}_6\text{F}_5)_3$ -catalysed reduction–lactonization of keto acids: concise syntheses of (–)-*cis*-whisky and (–)-*cis*-cognac lactones, *Synlett* 2017, **29**, 2453–2459. (b) A. Skrobiszewski, W. Gładkowski, P. Walczak, A. Gliszczynska, G. Maciejewska, T. Klejdysz, J. Nawrot and C. Wawrzenczyk, Synthesis of  $\beta$ -aryl- $\gamma$ -lactones and relationship: Structure – antifeedant and antifungal activity, *J. Chem. Sci.* 2015, **127**, 687–699

**$^1\text{H}$  and  $^{13}\text{C}$**   
**NMR Spectra**

For

*Alkynoates and Butenolides*

S1.10.fid

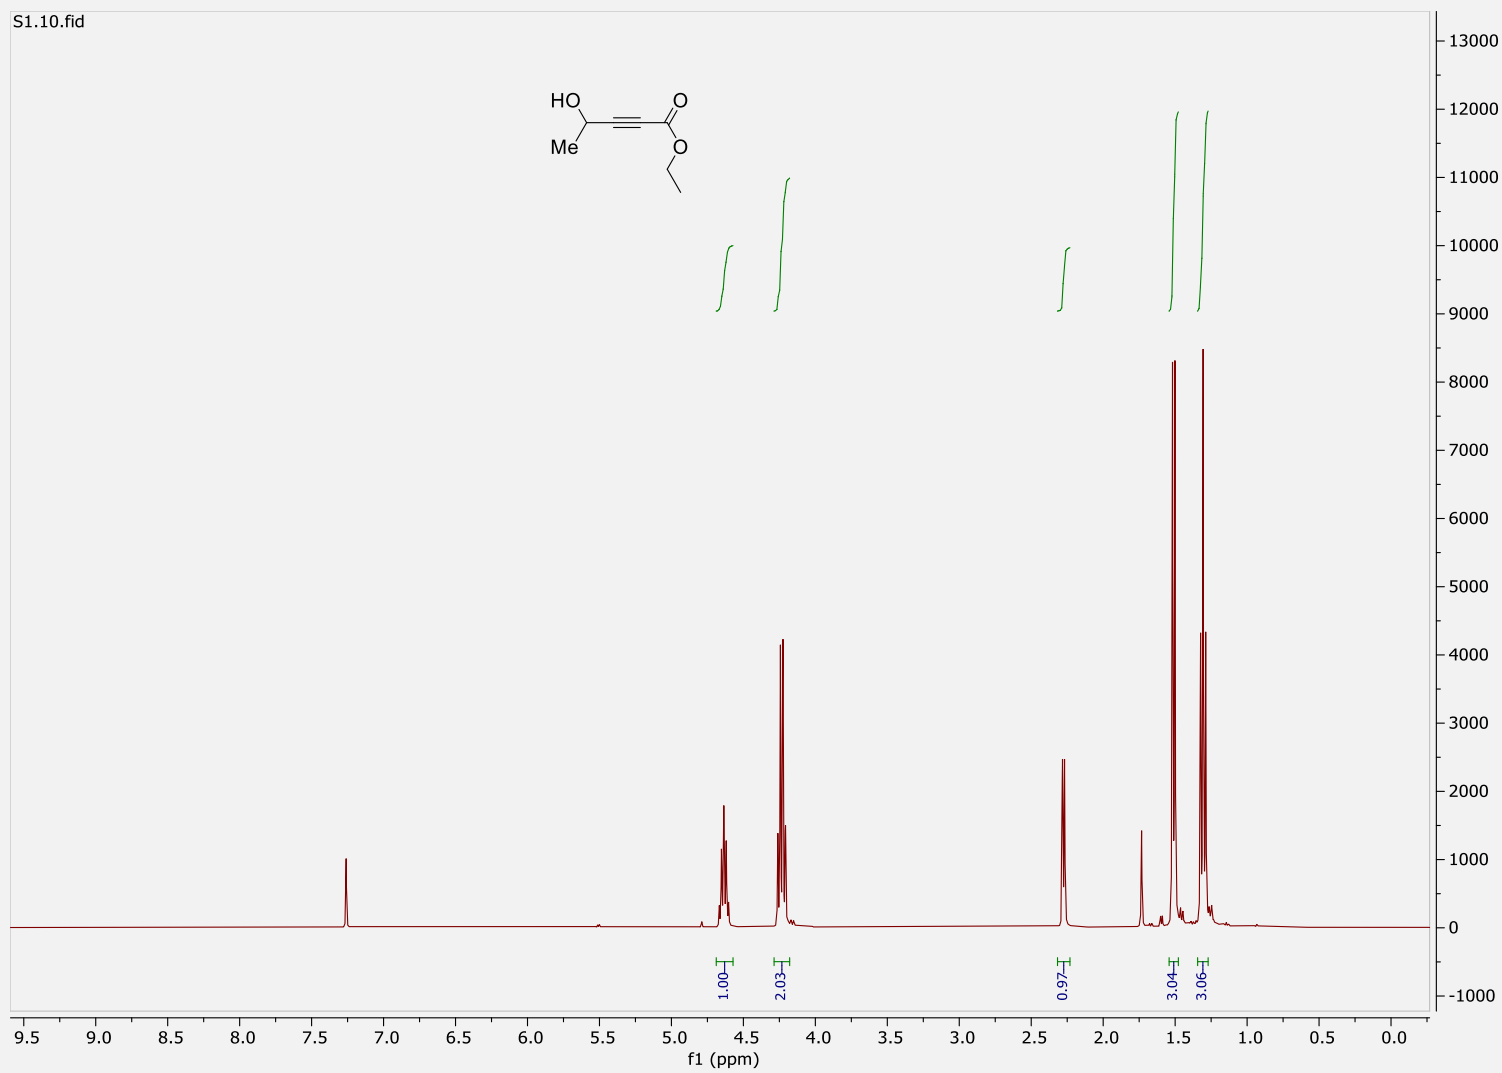

S37

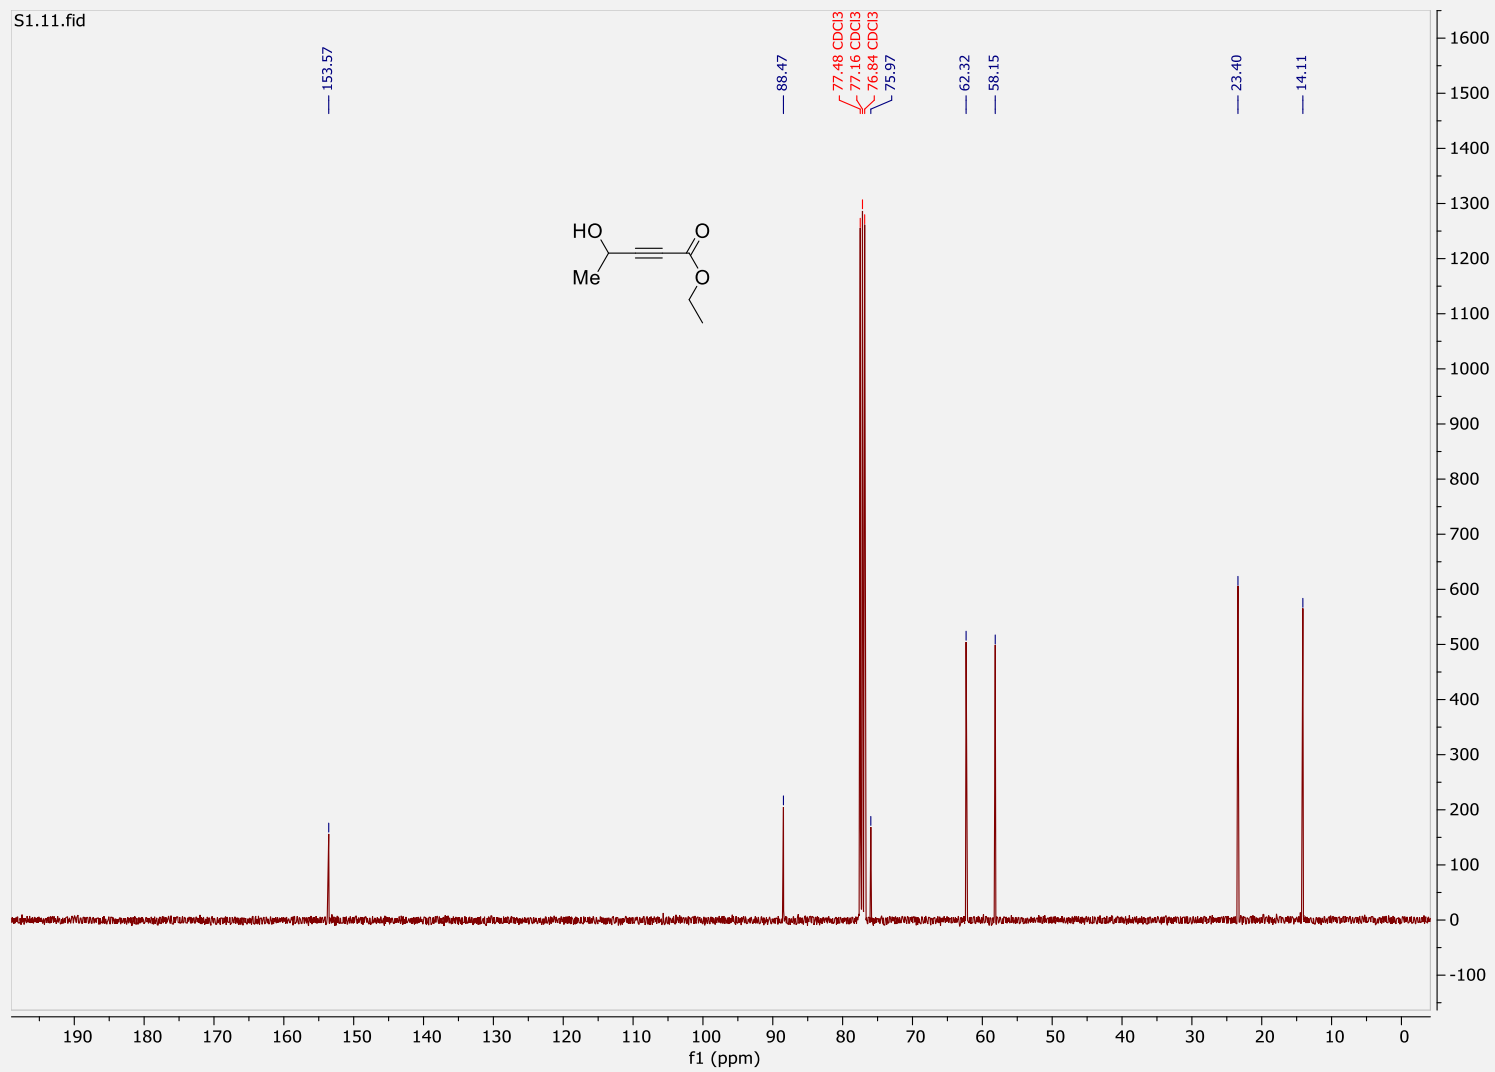

Jan07-2023.20.fid  
Exp. 10 Compound 3

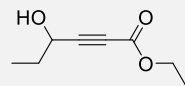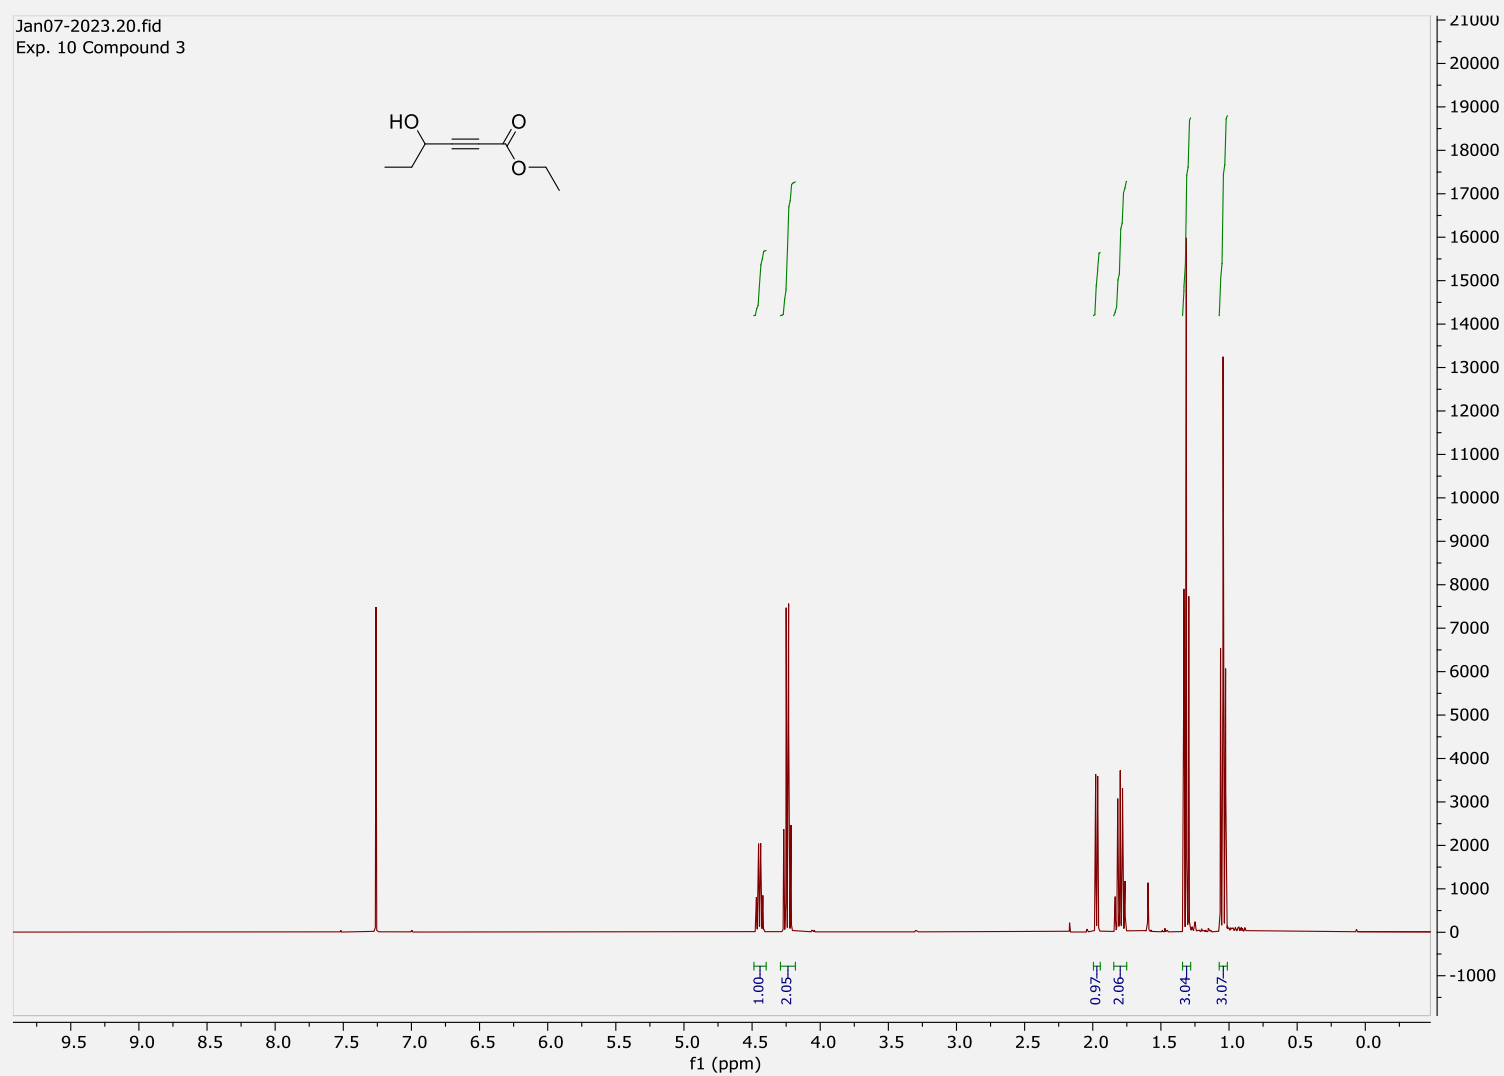

Dec02-2022.11.fid  
Exp. 10 Compound 3

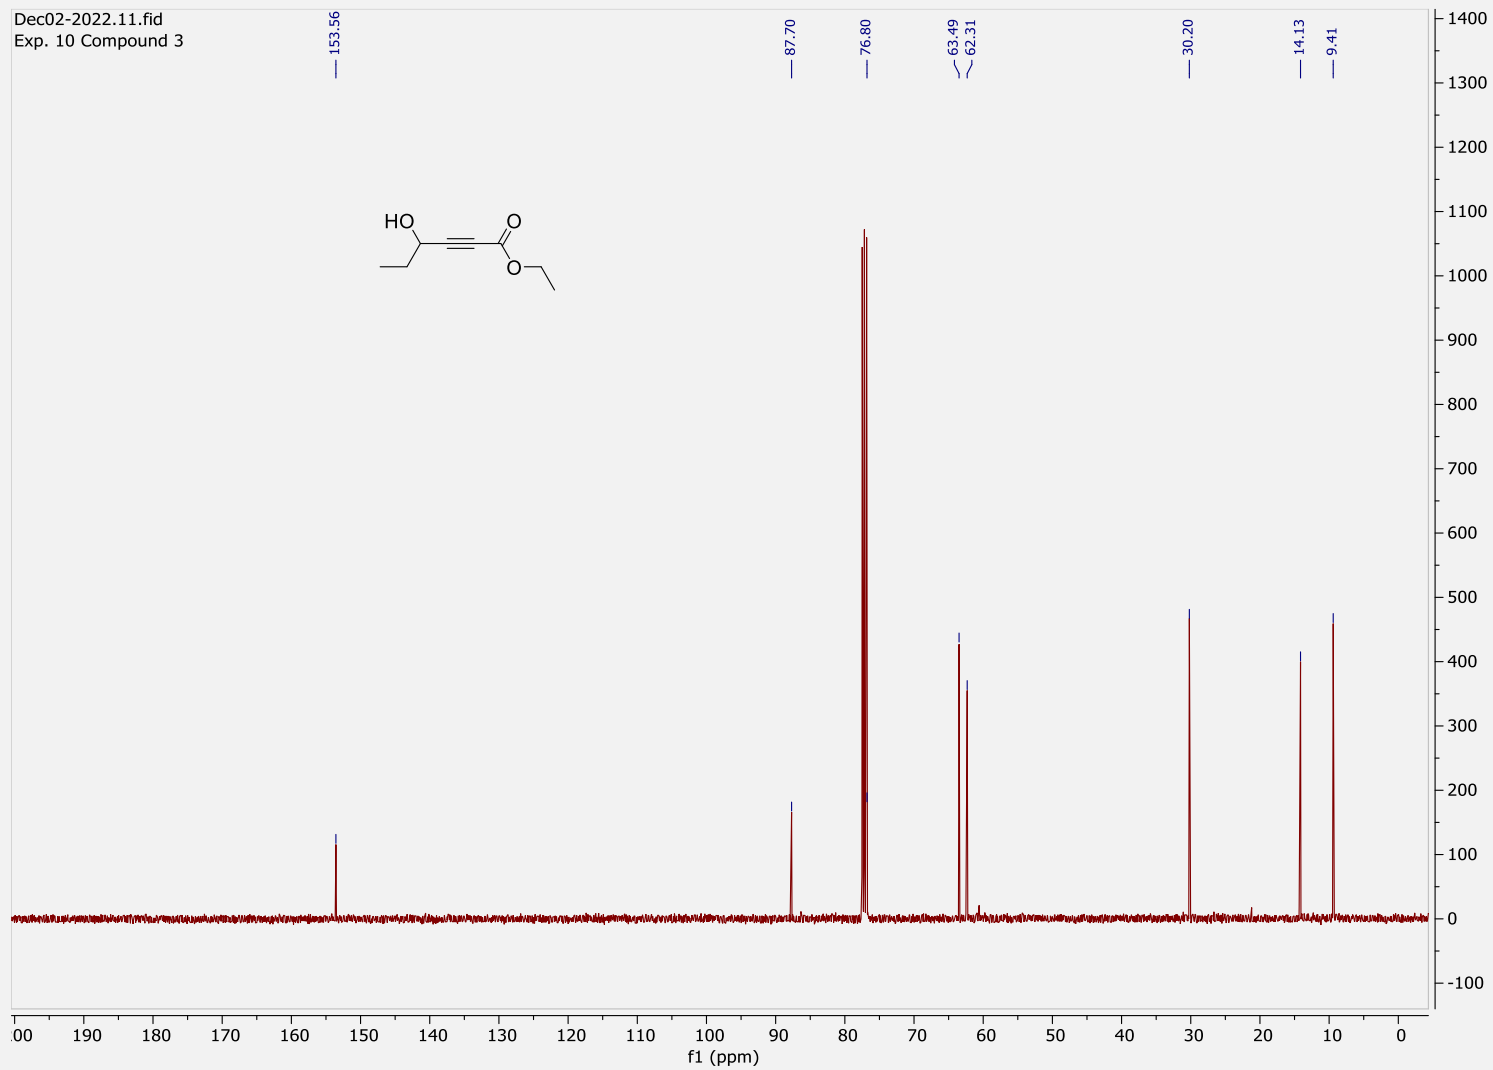



S3.10.fid

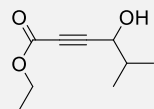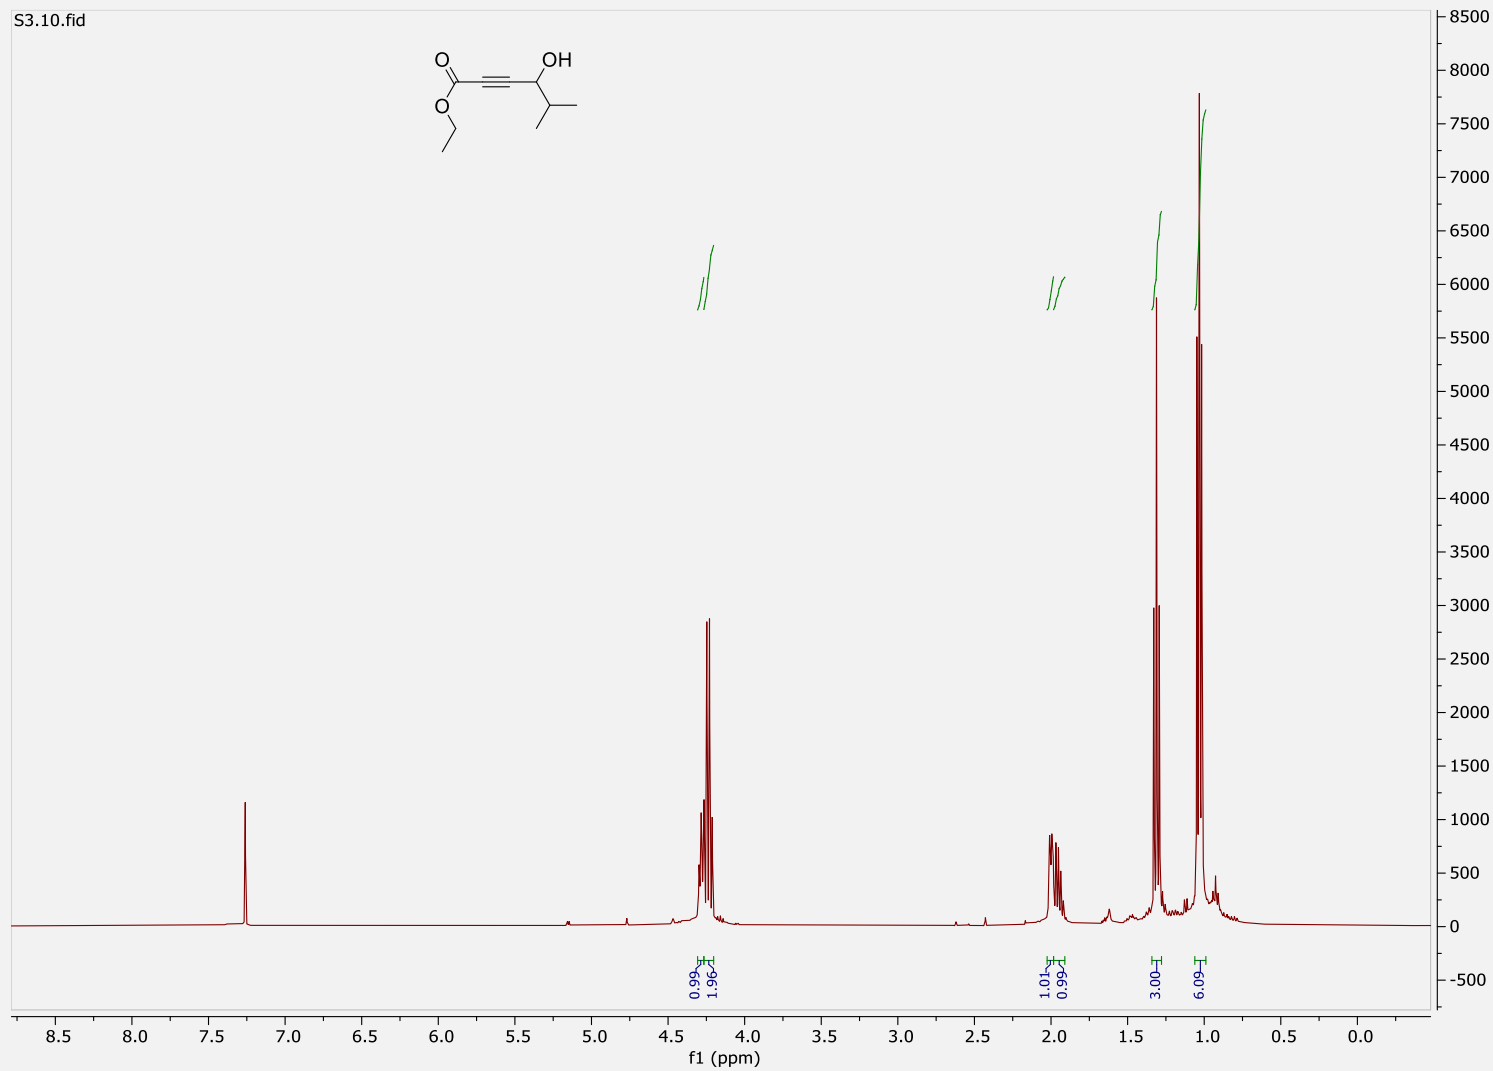

Nov04-2022.20.fid  
Exp 1. Compound 3

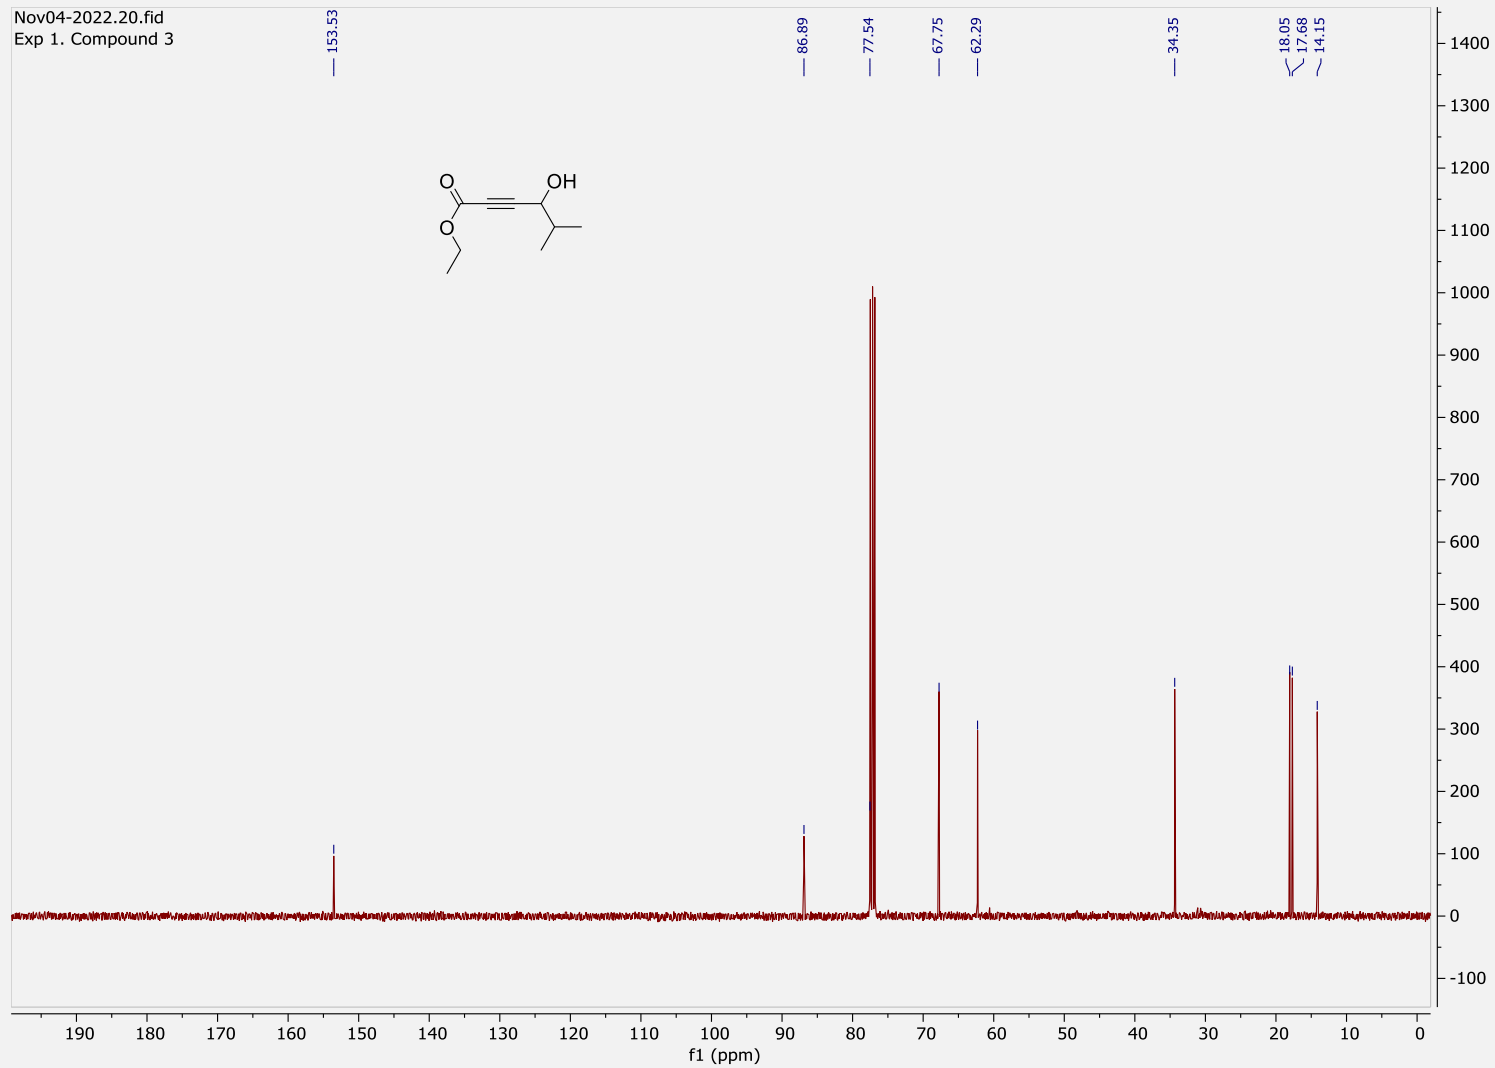

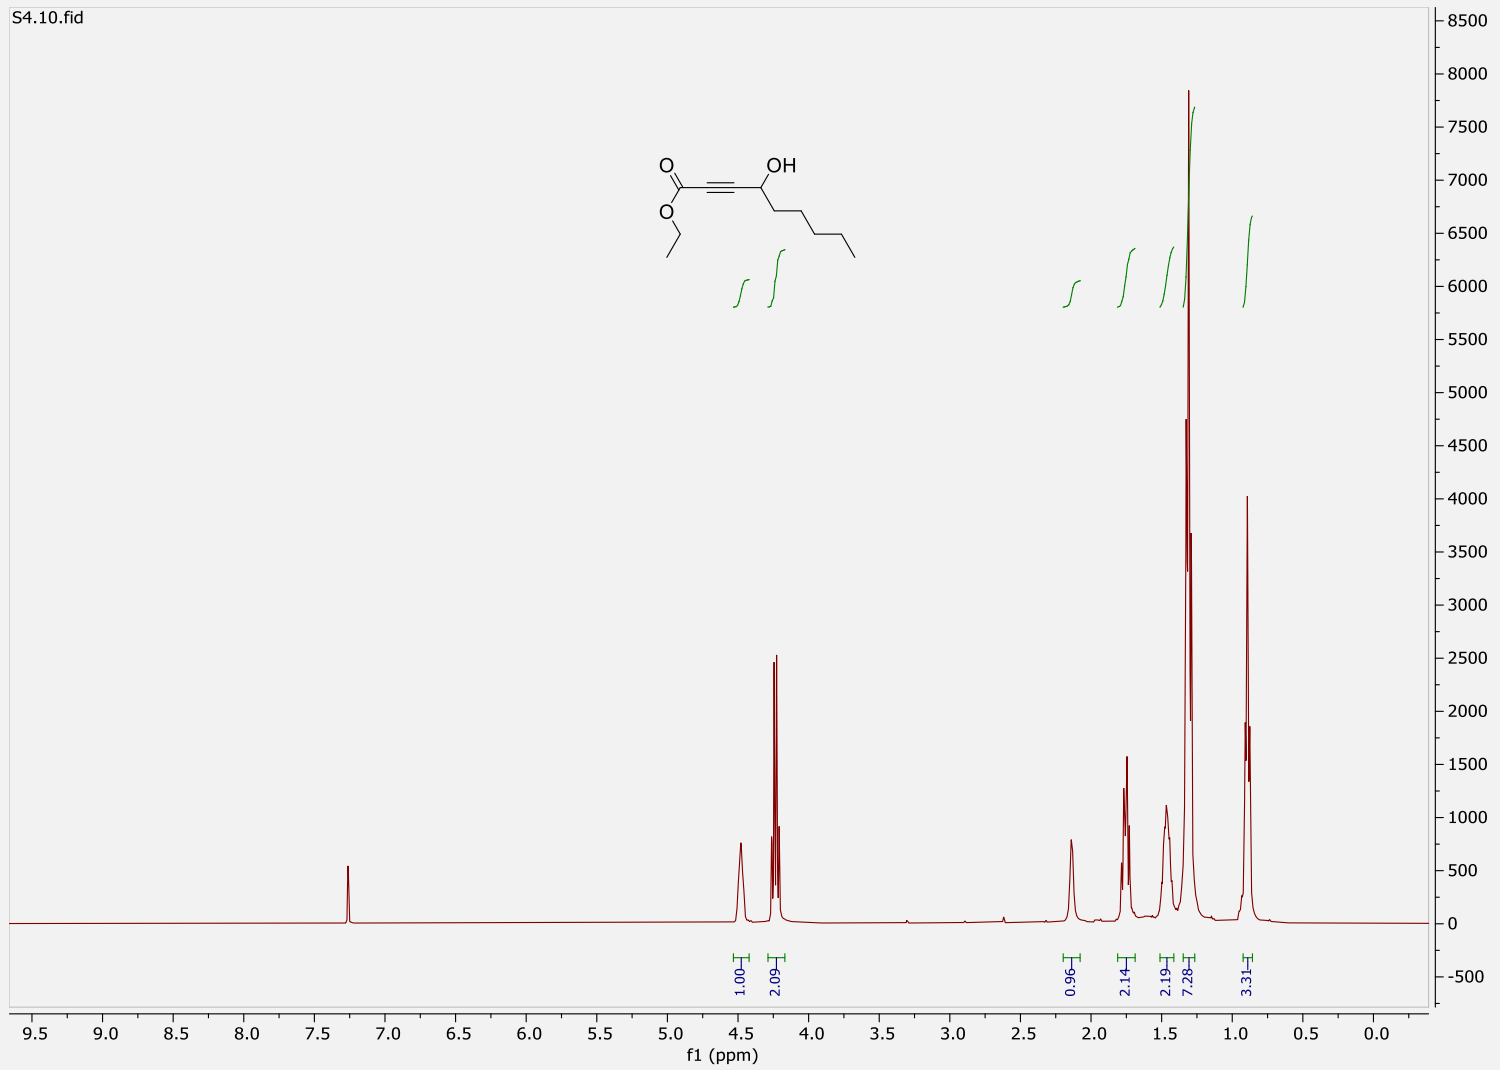

S43

Dec27-2022.21.fid  
hexanal

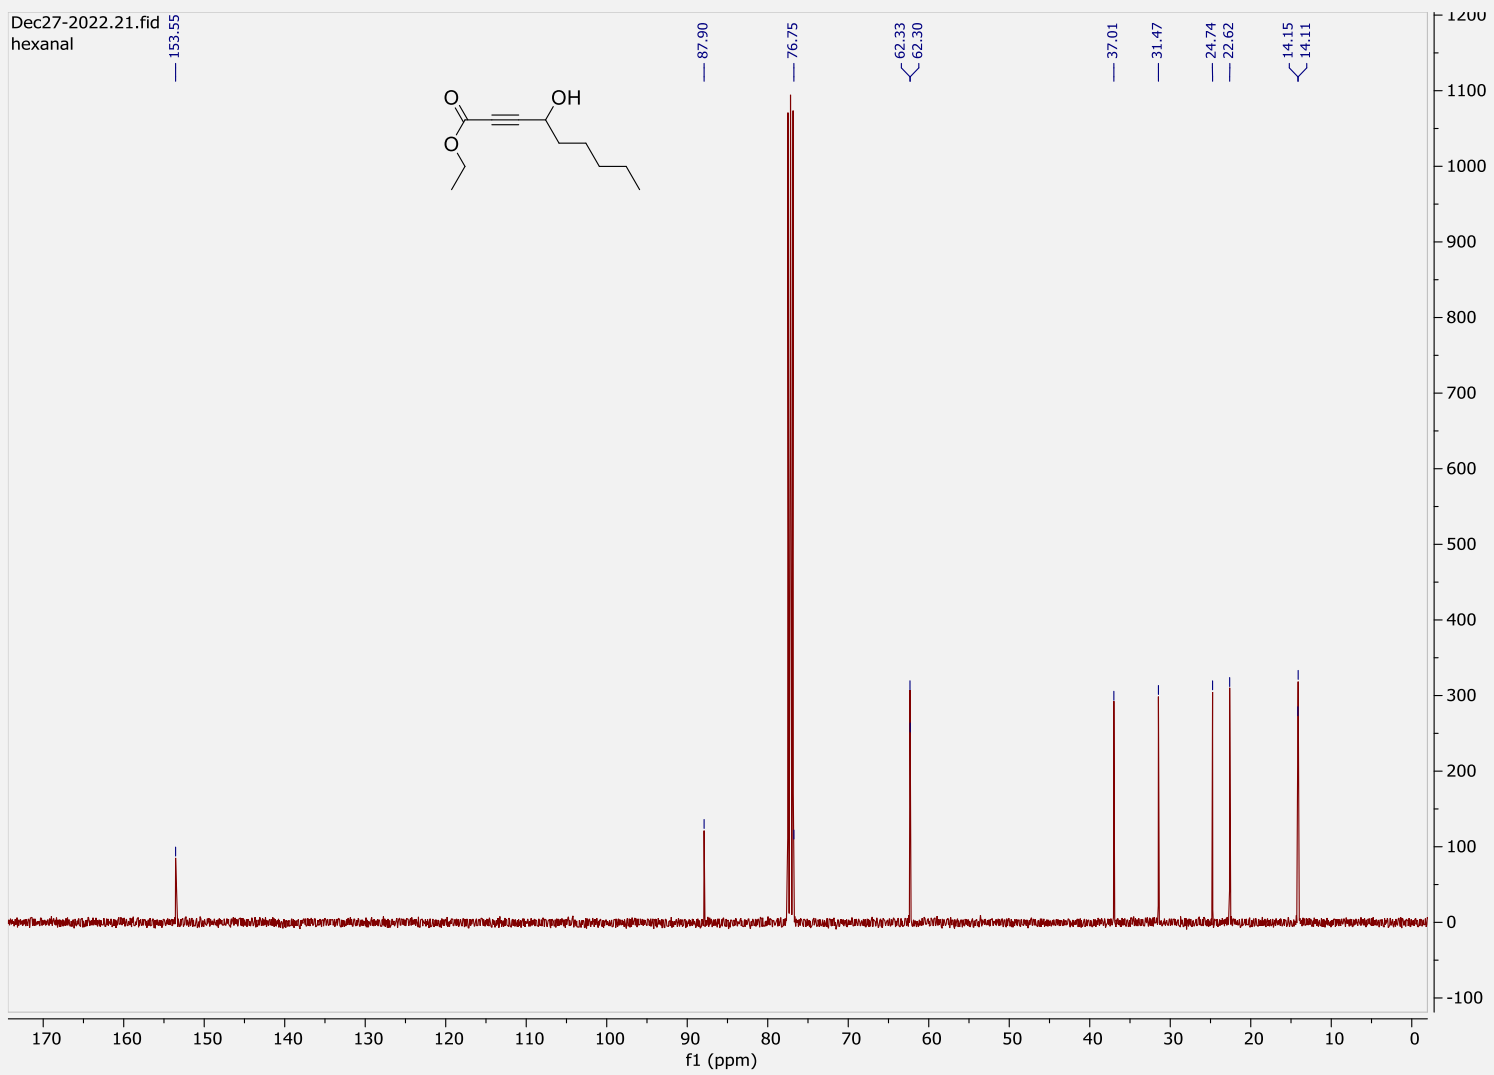

S44

Dec27-2022.50.fid  
Exp. 16 compound 3

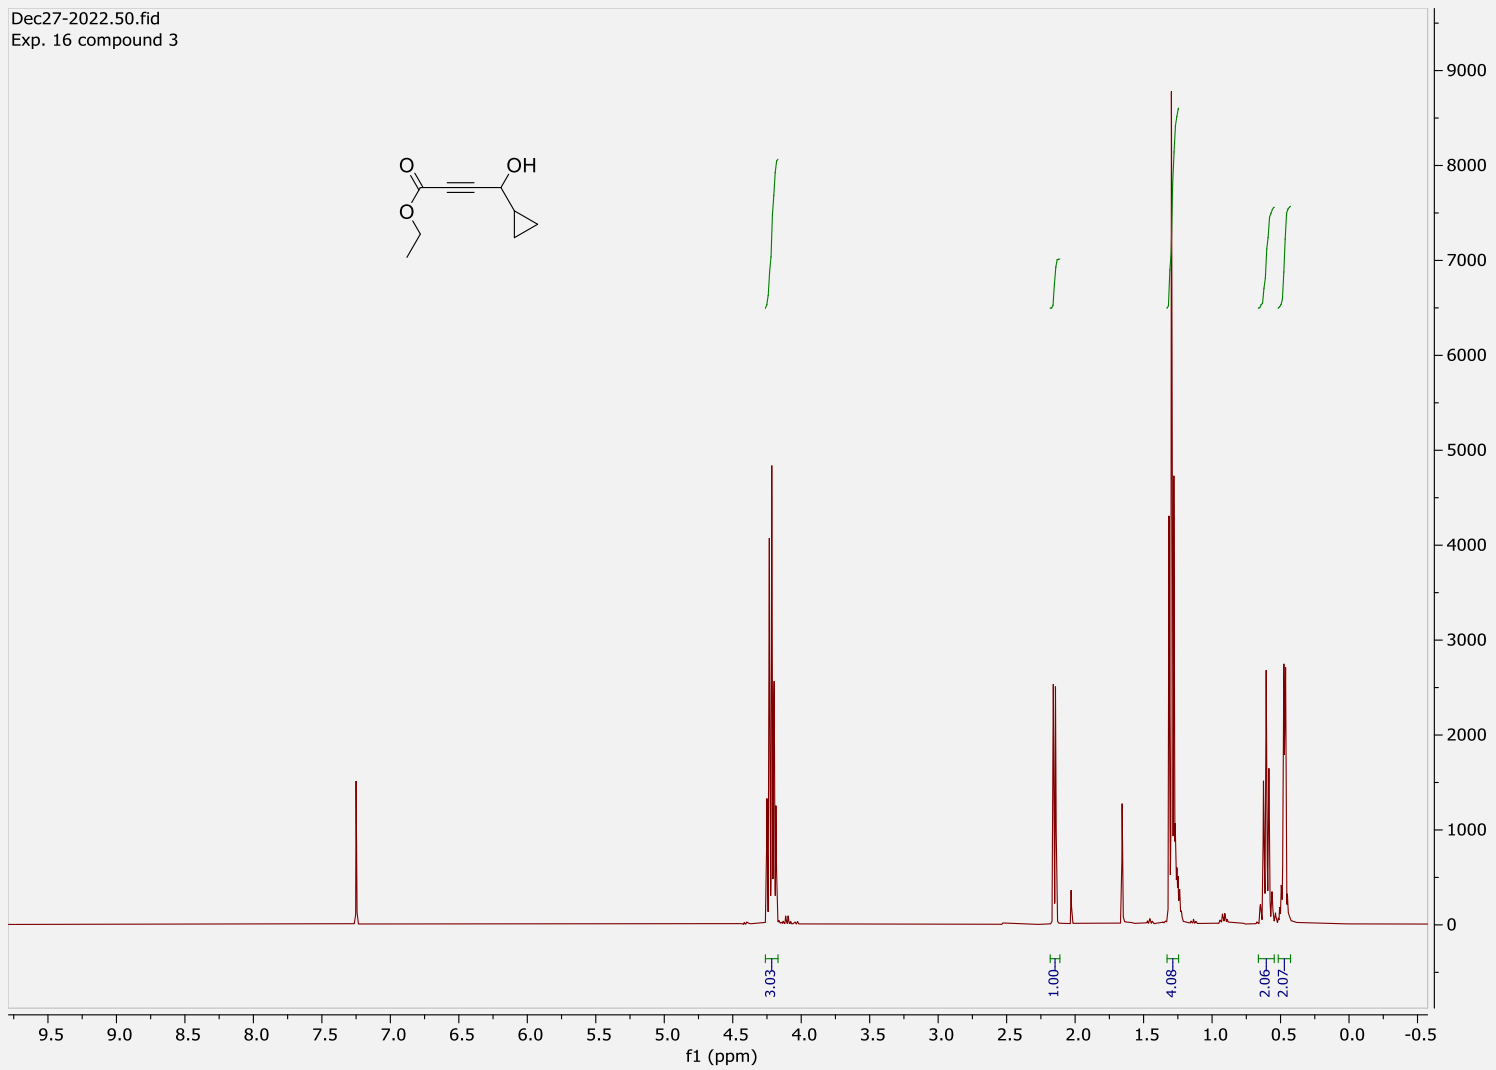

S45

Dec27-2022.51.fid  
Exp. 16 compound 3

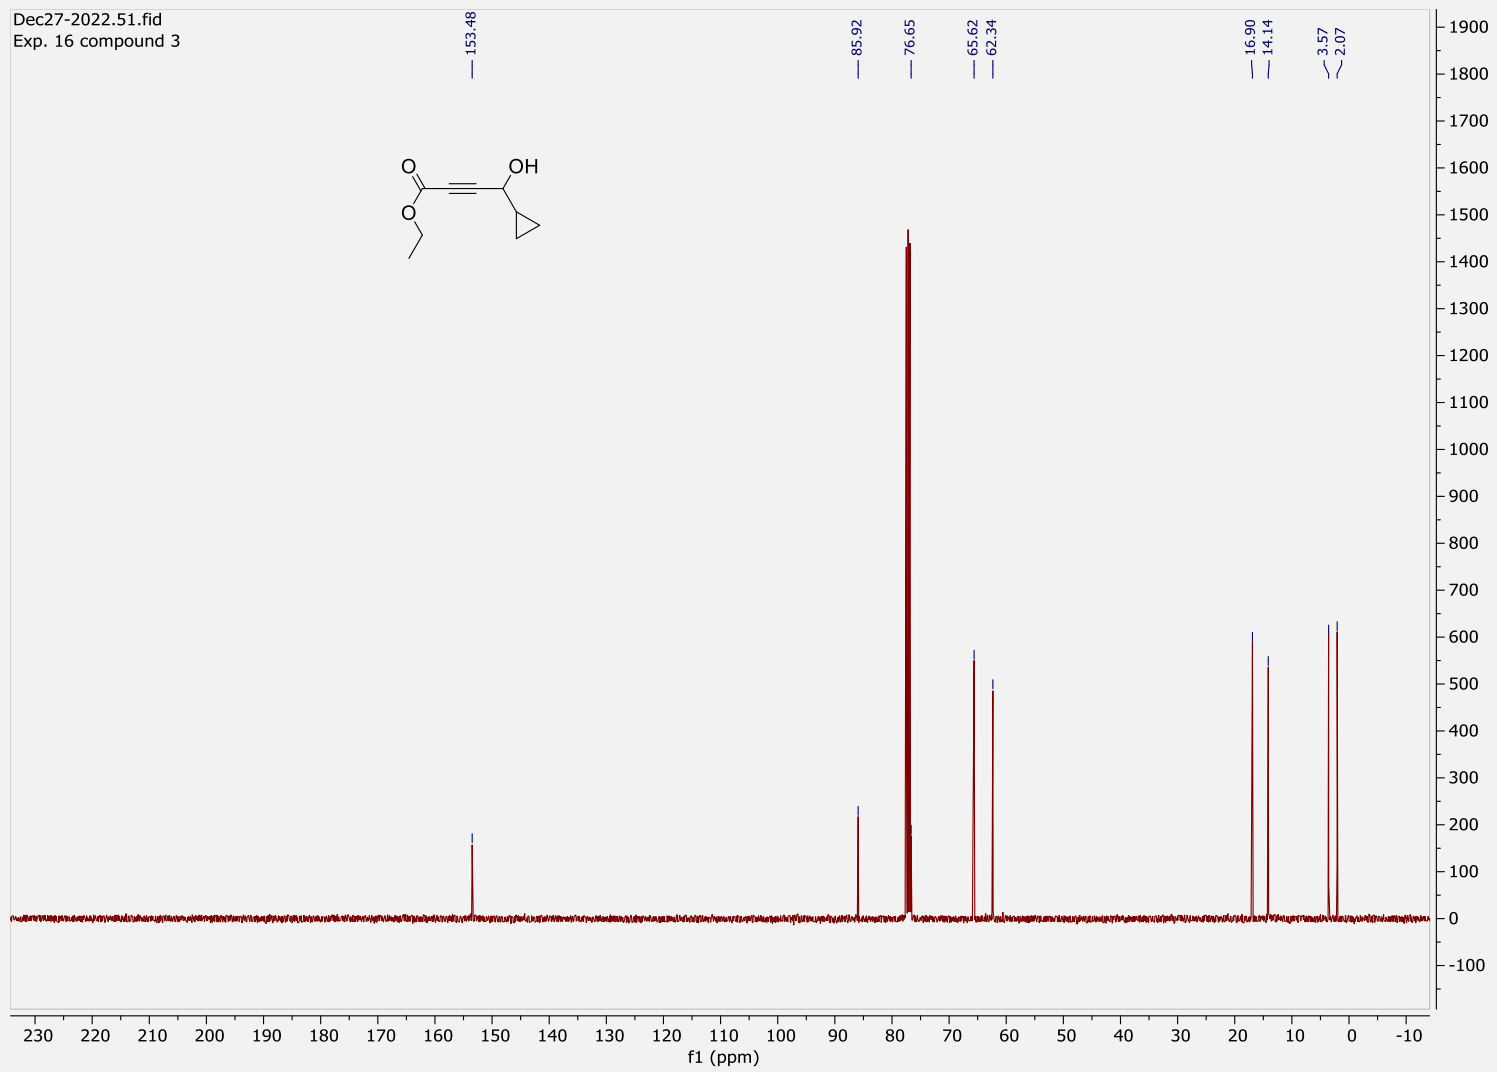

Jan06-2023.20.fid  
Exp. 21 Compound 3

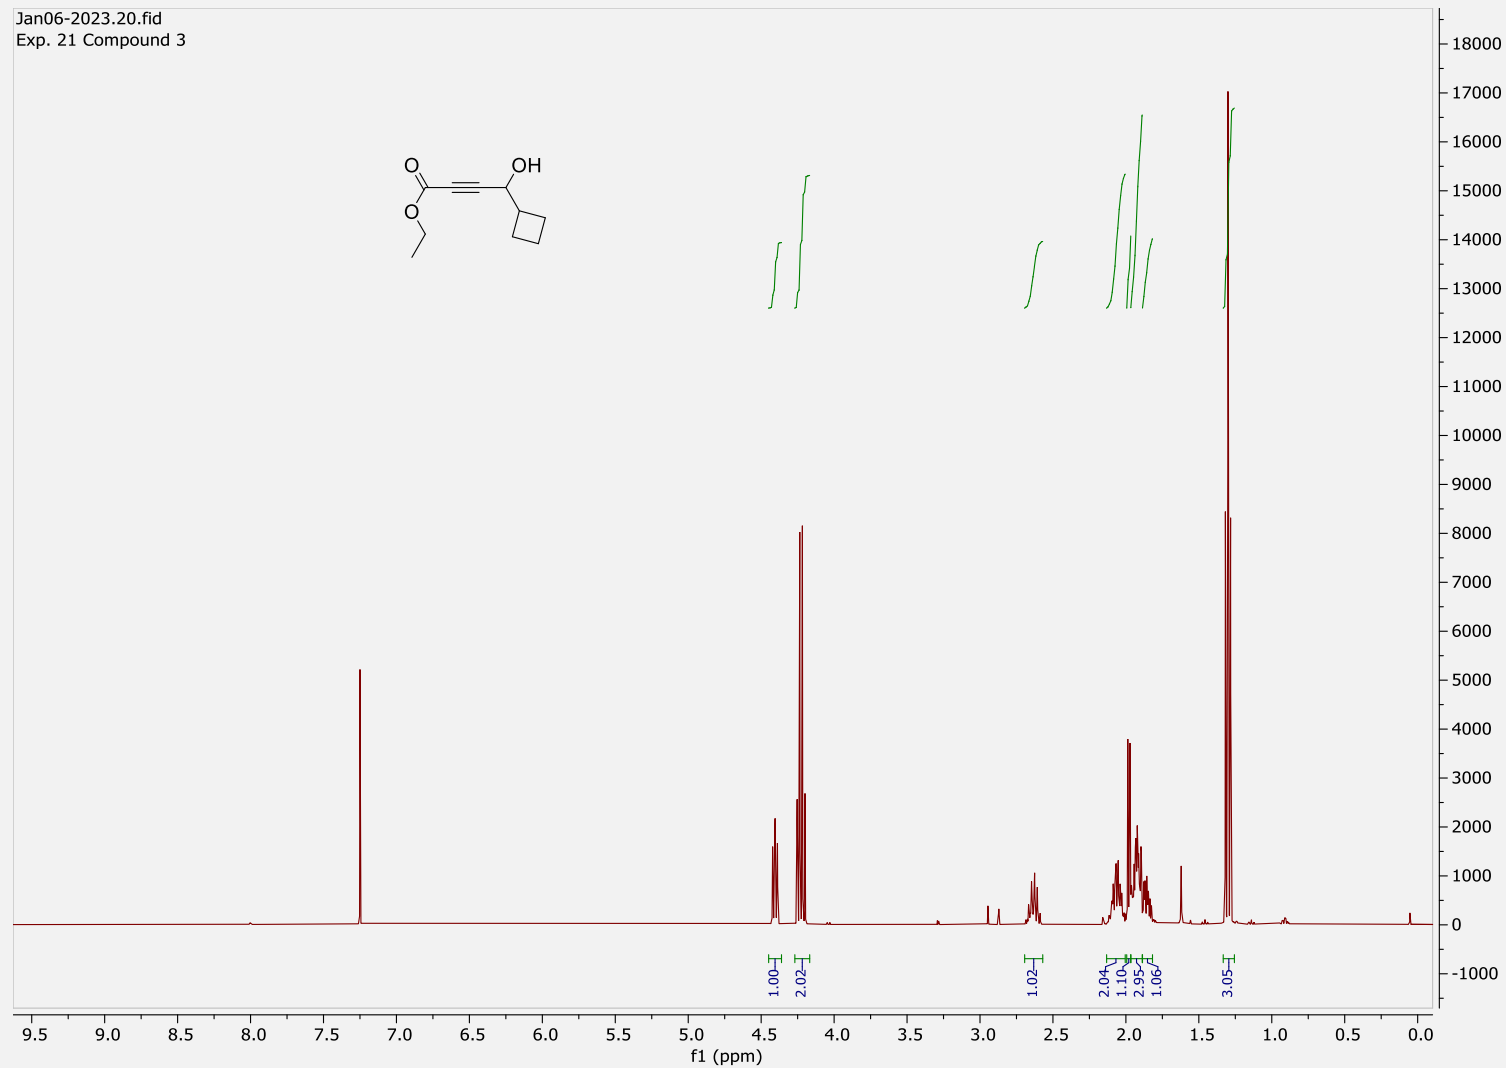

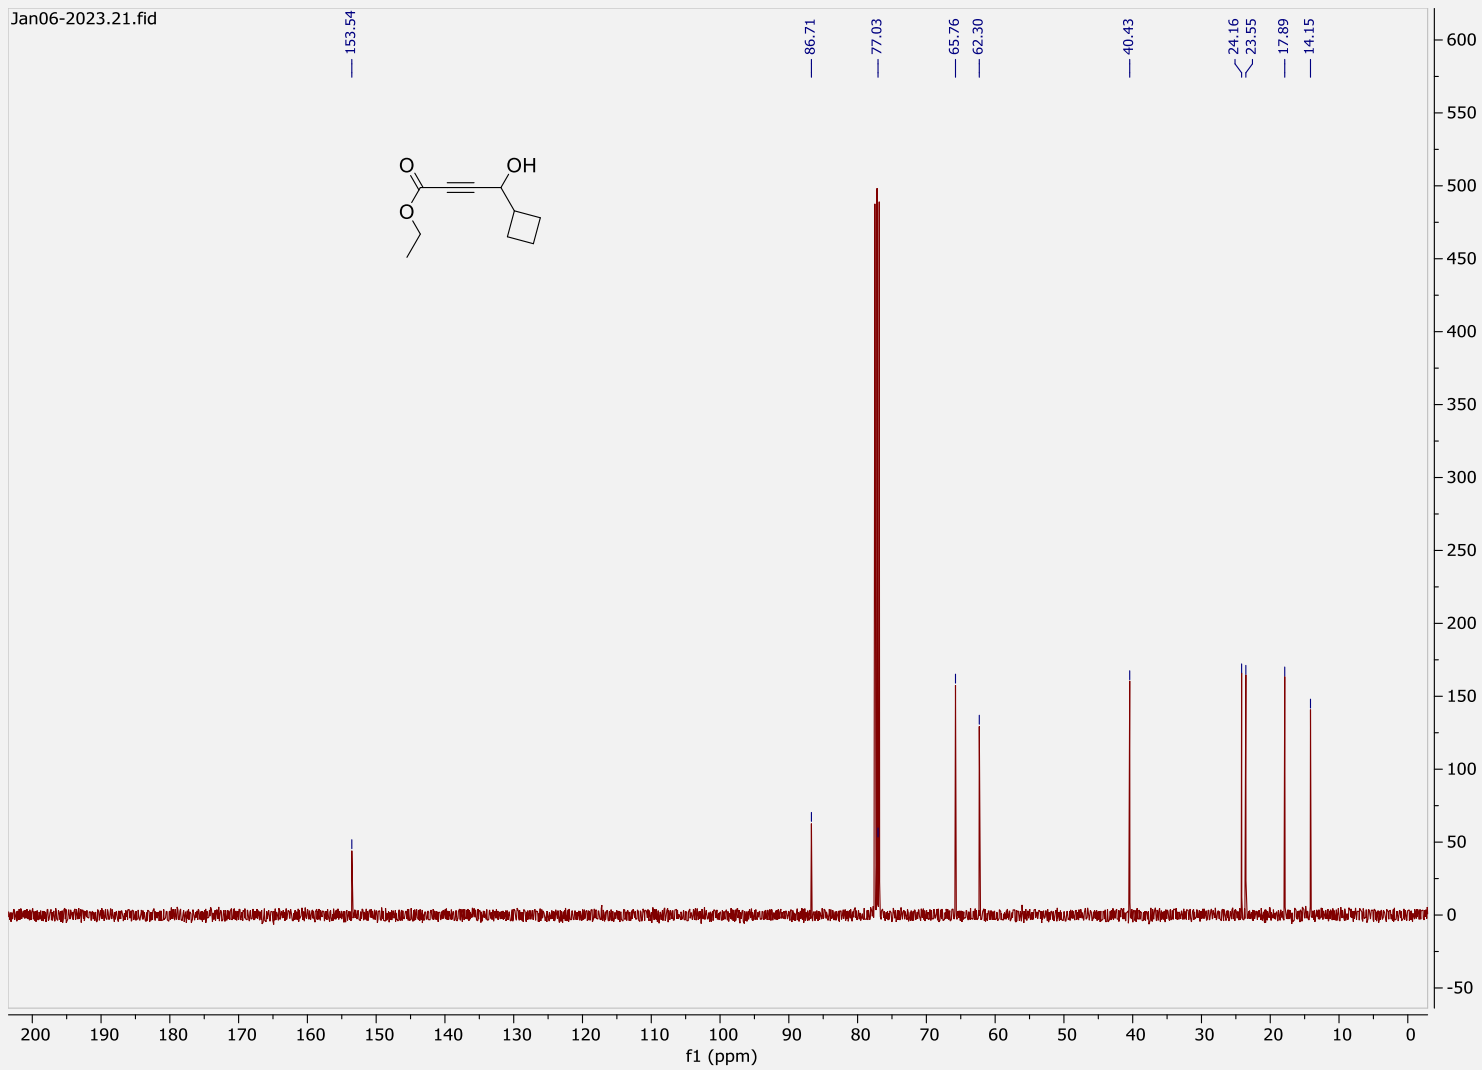



Dec27-2022.60.fid  
Exp. 17 compound 3

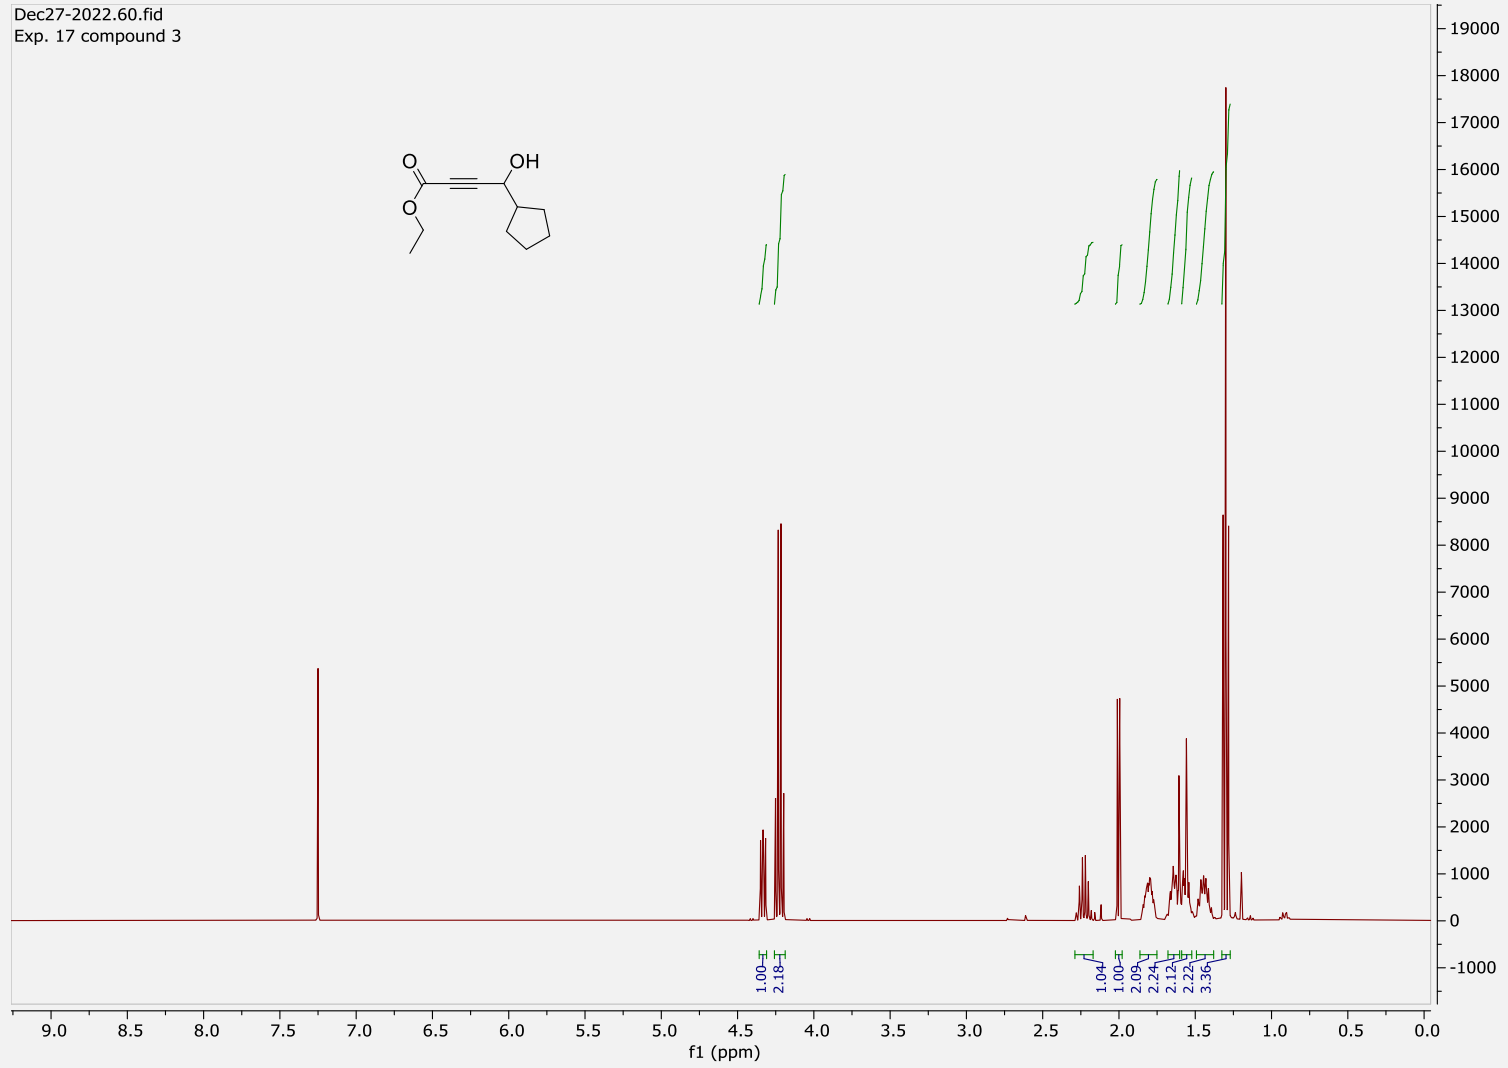

Dec27-2022.61.fid  
Exp. 17 compound 3

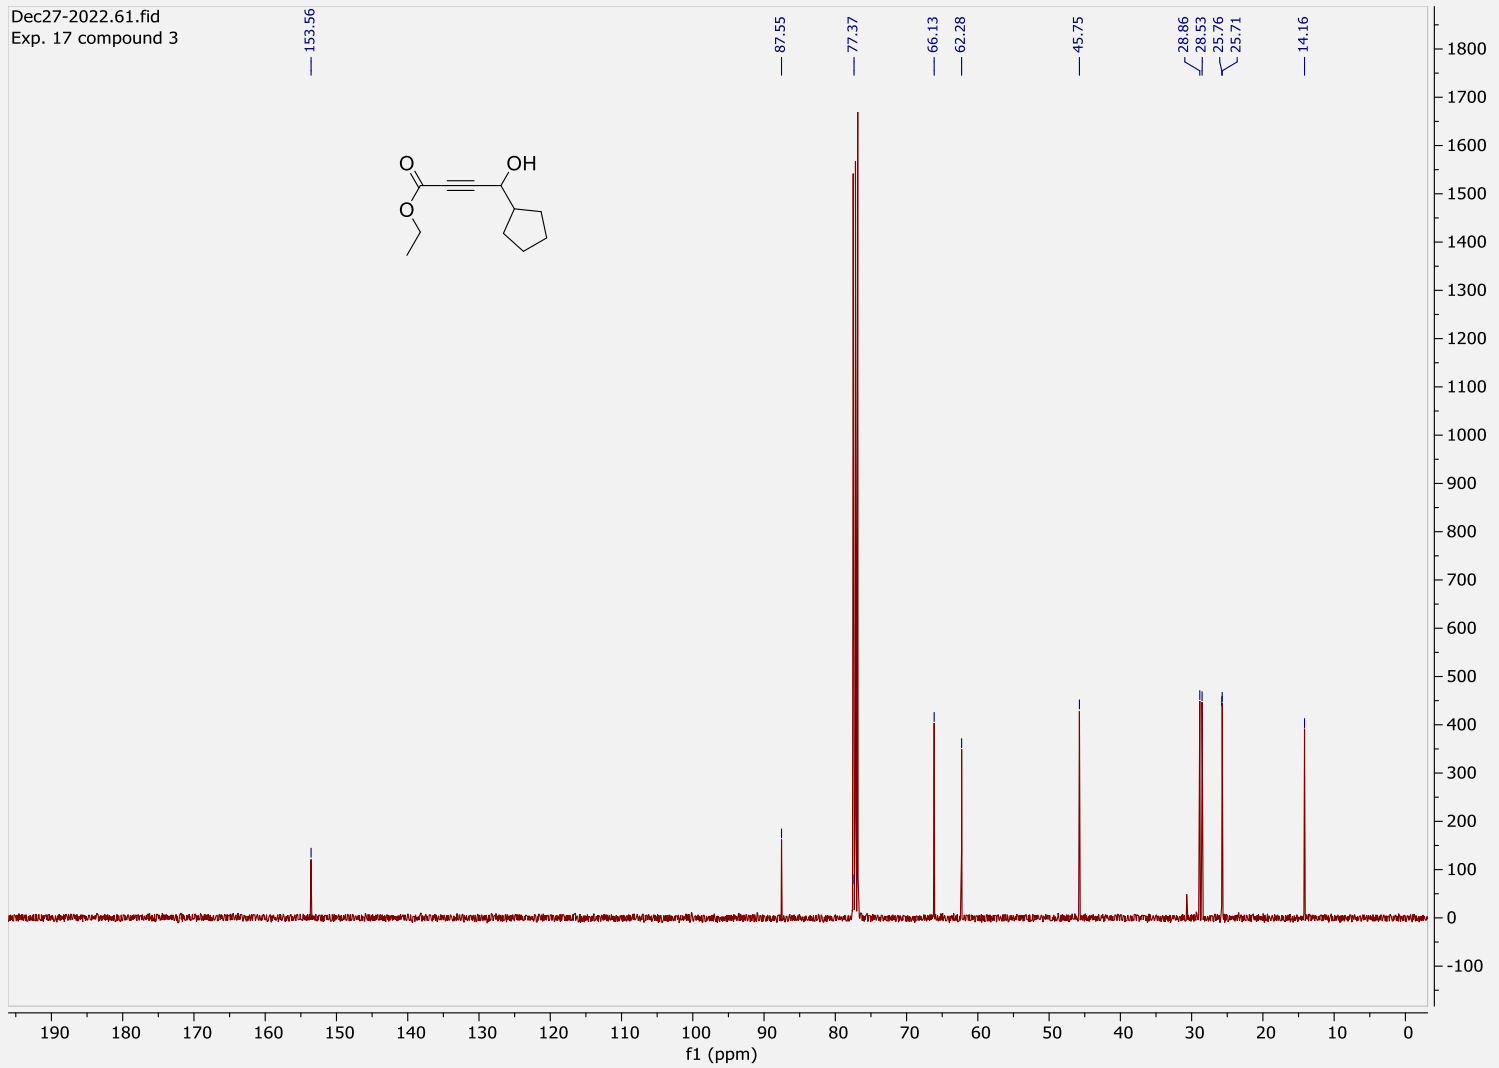

S50

Jan07-2023.30.fid  
Exp. 12 Compound 3

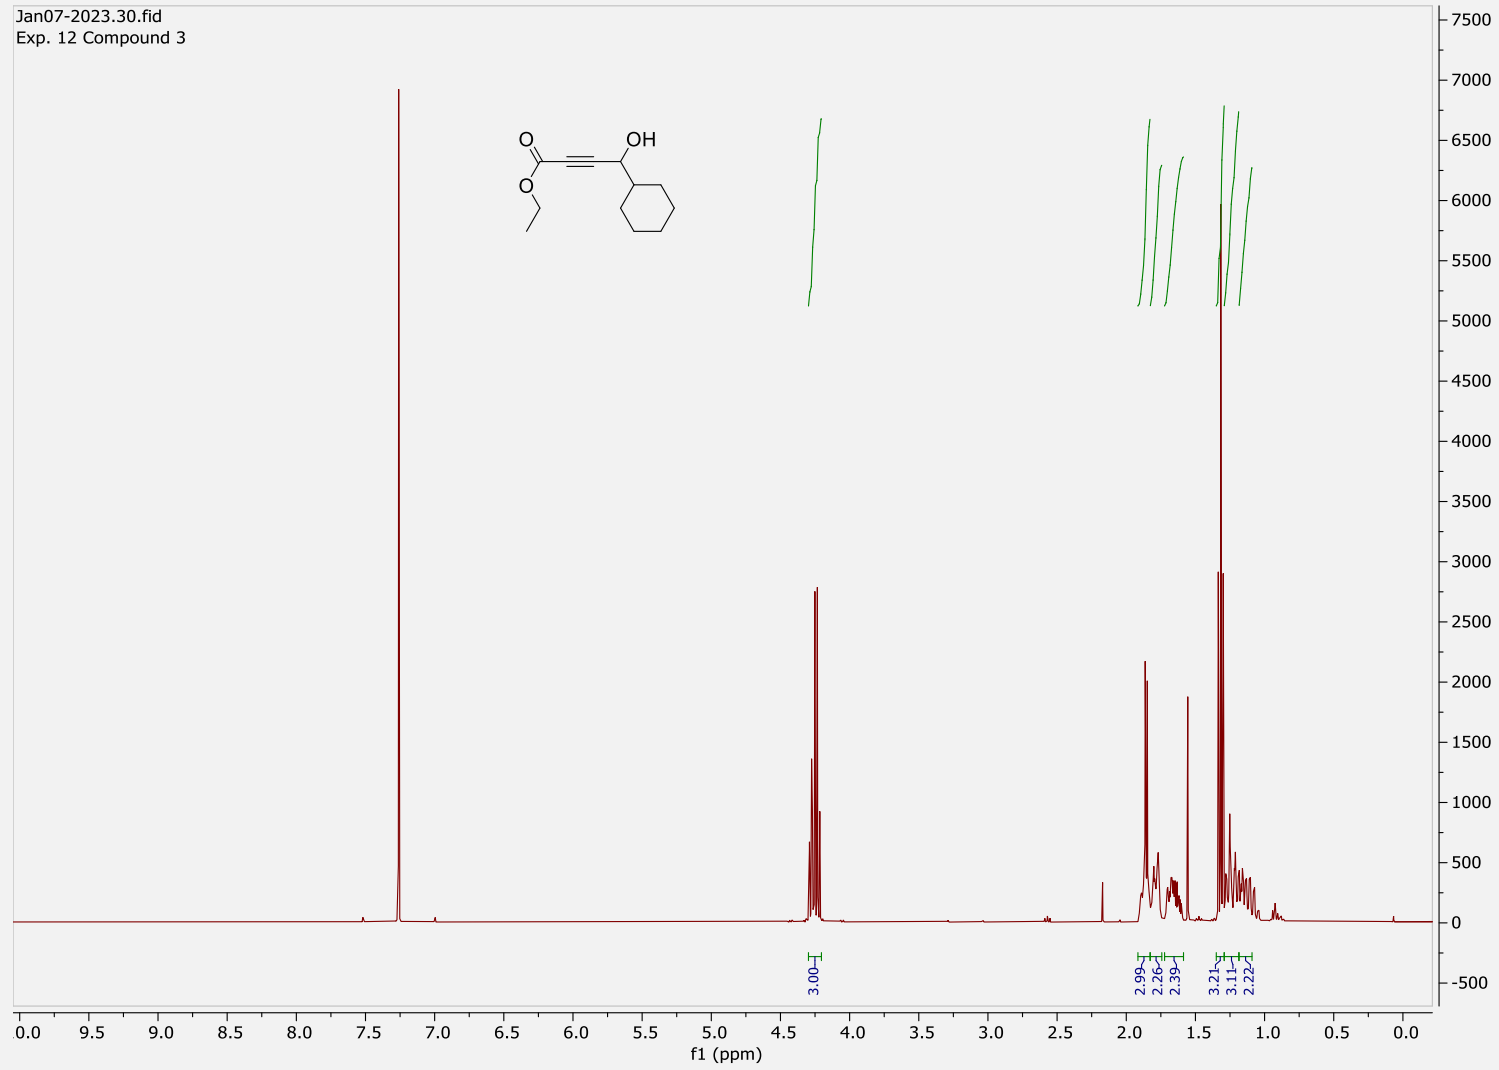

Dec05-2022.21.fid  
Exp. 12 Compound 3

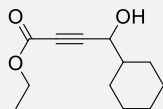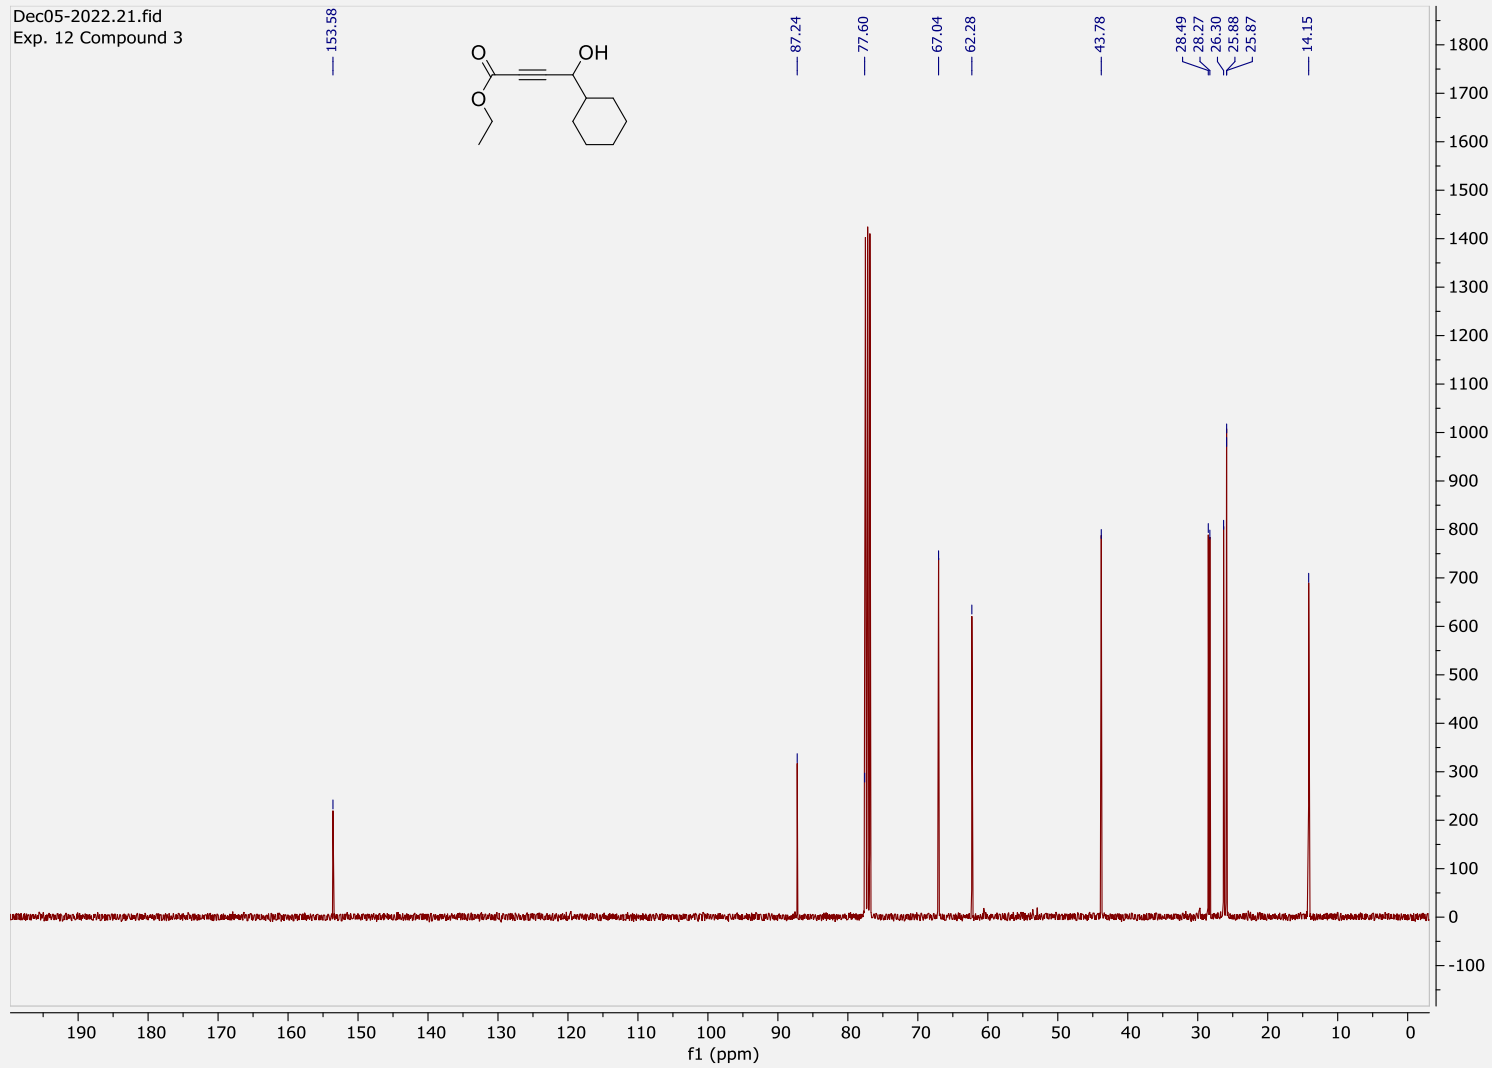

S9.10.fid

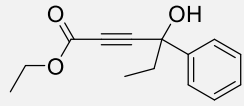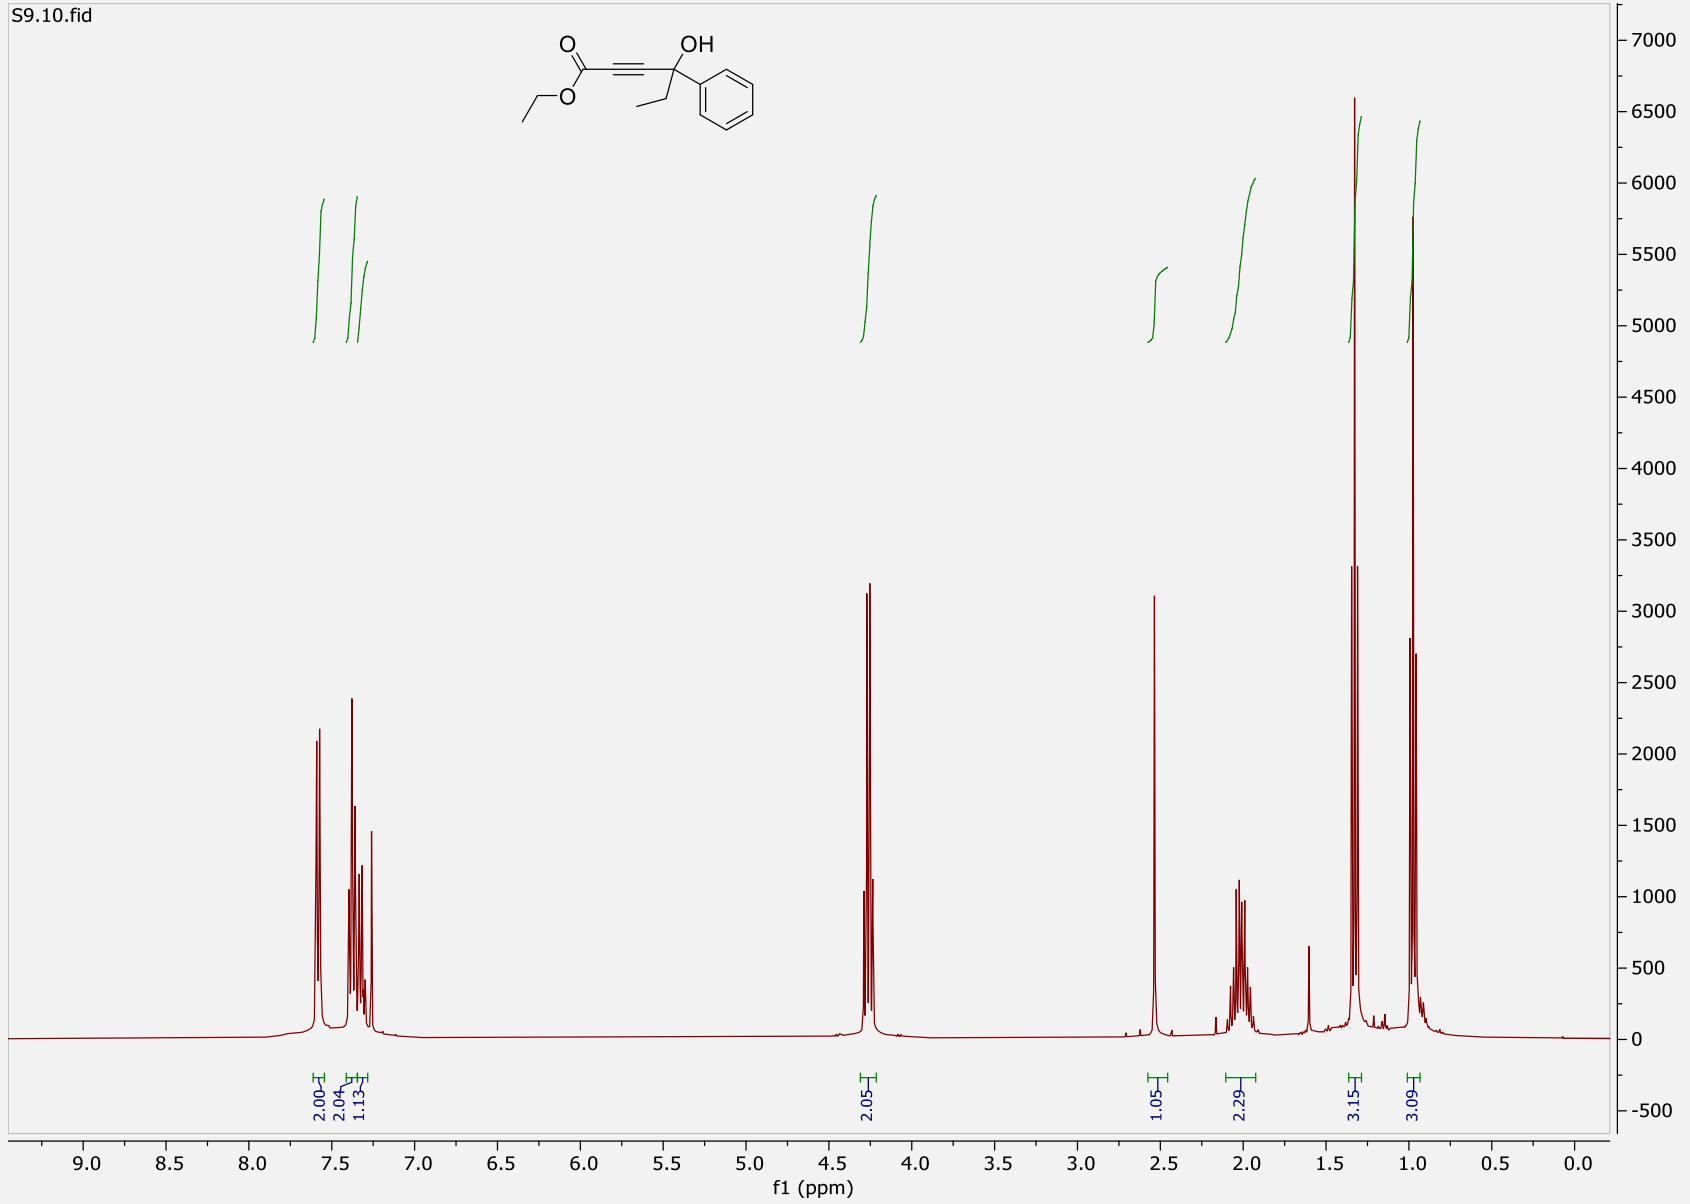

S53

Jan19-2023.10.fid

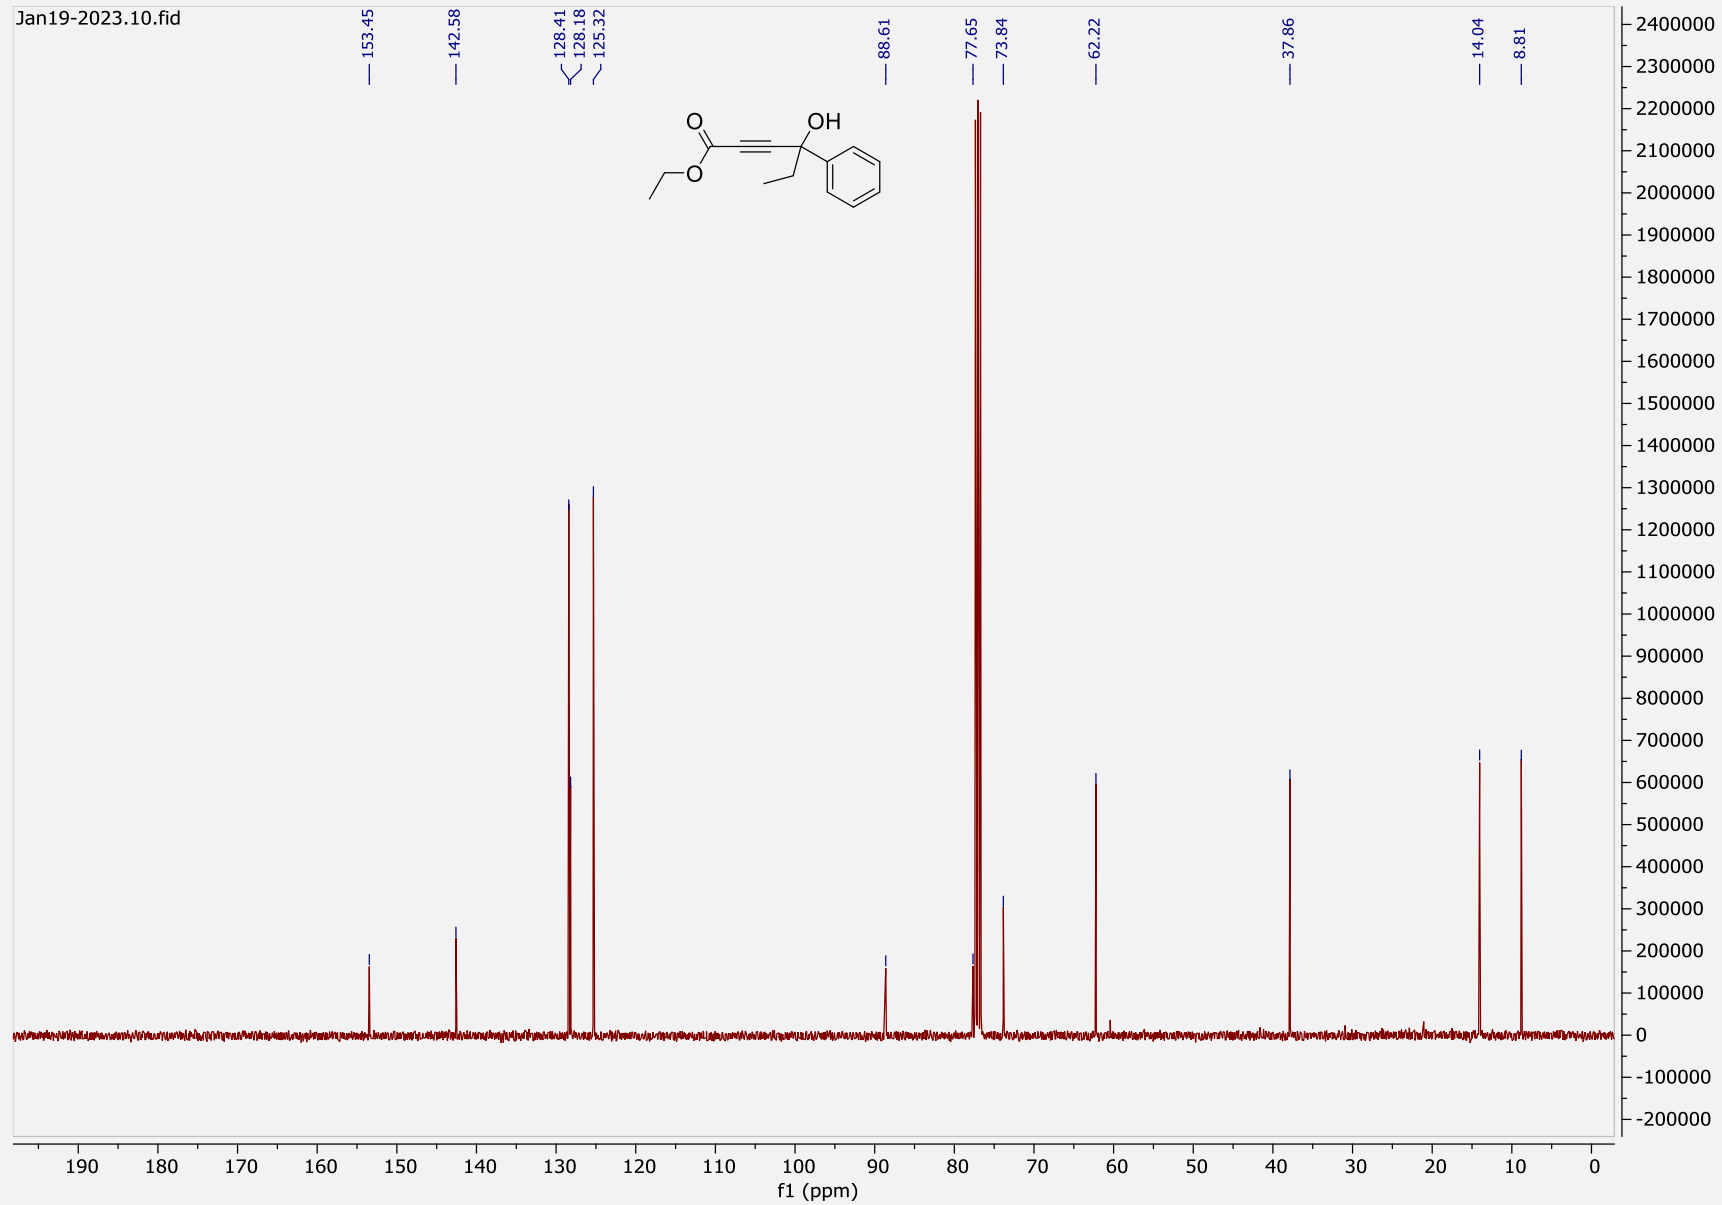

S54

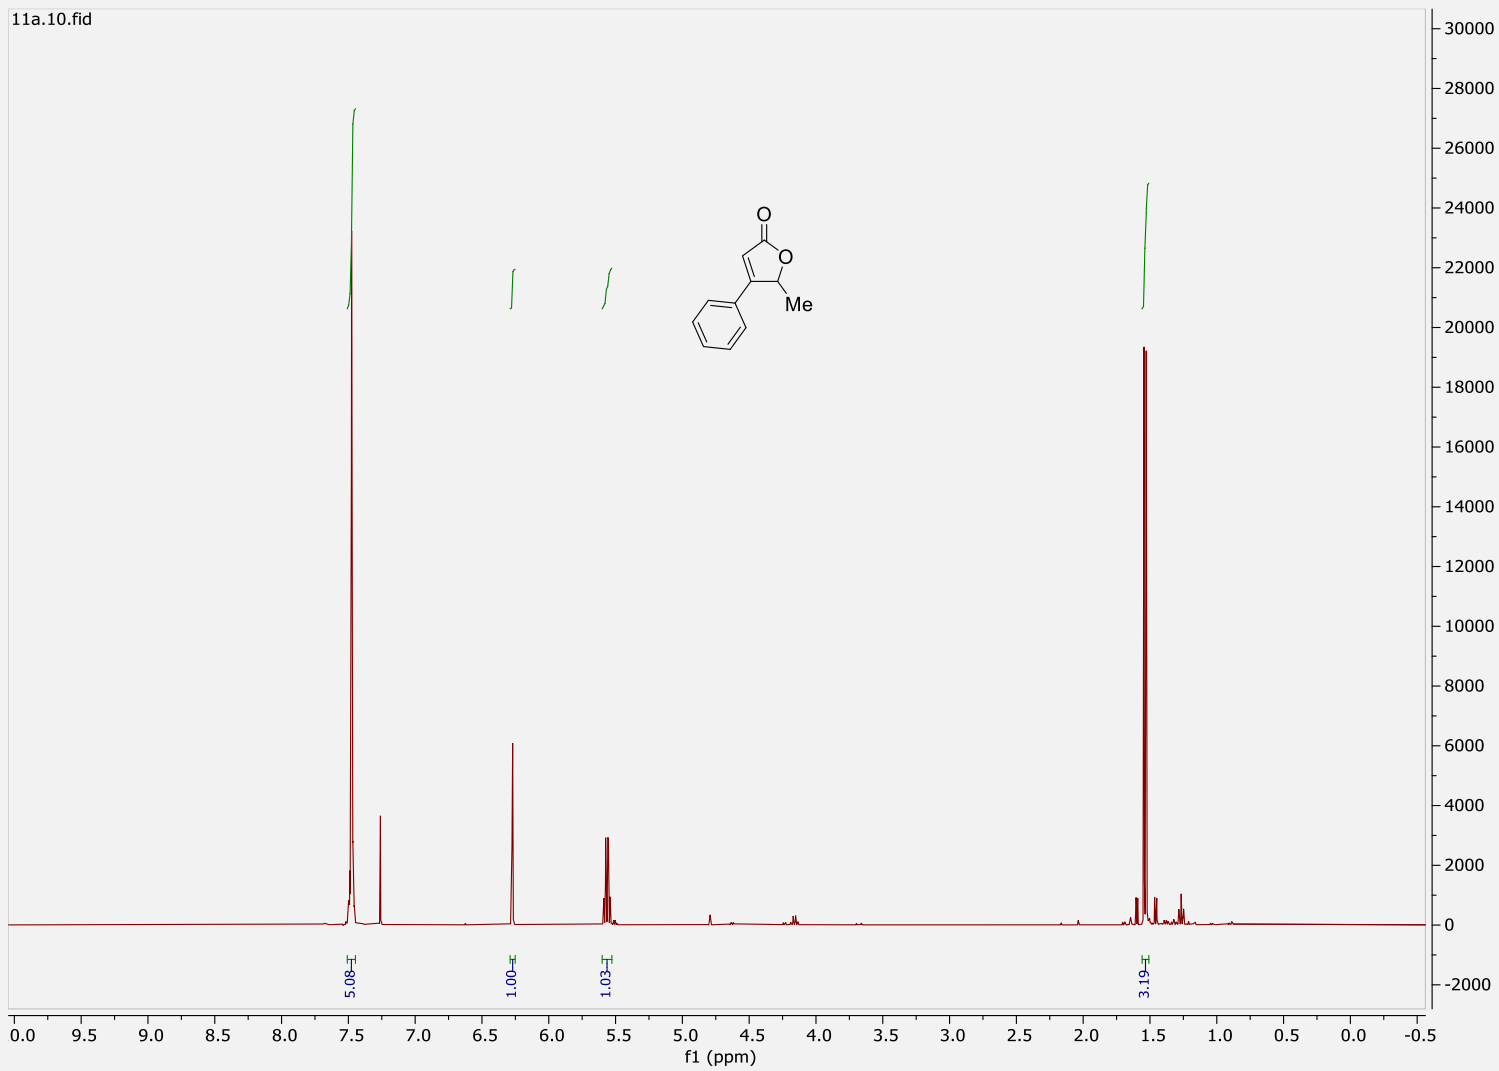

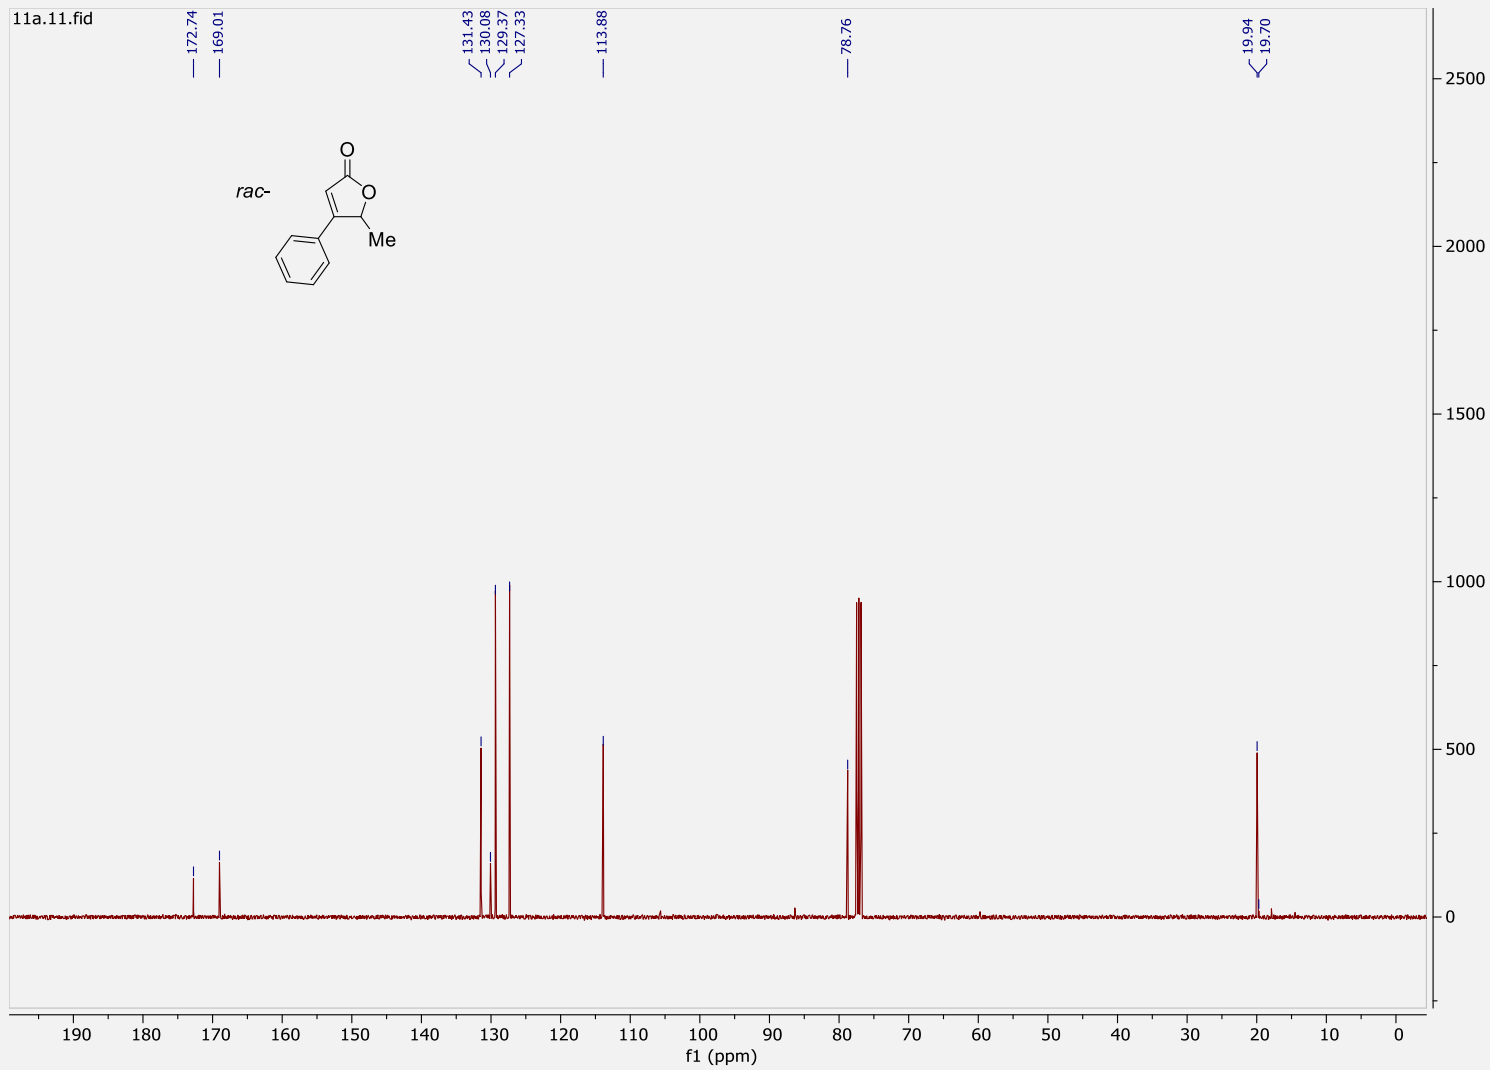



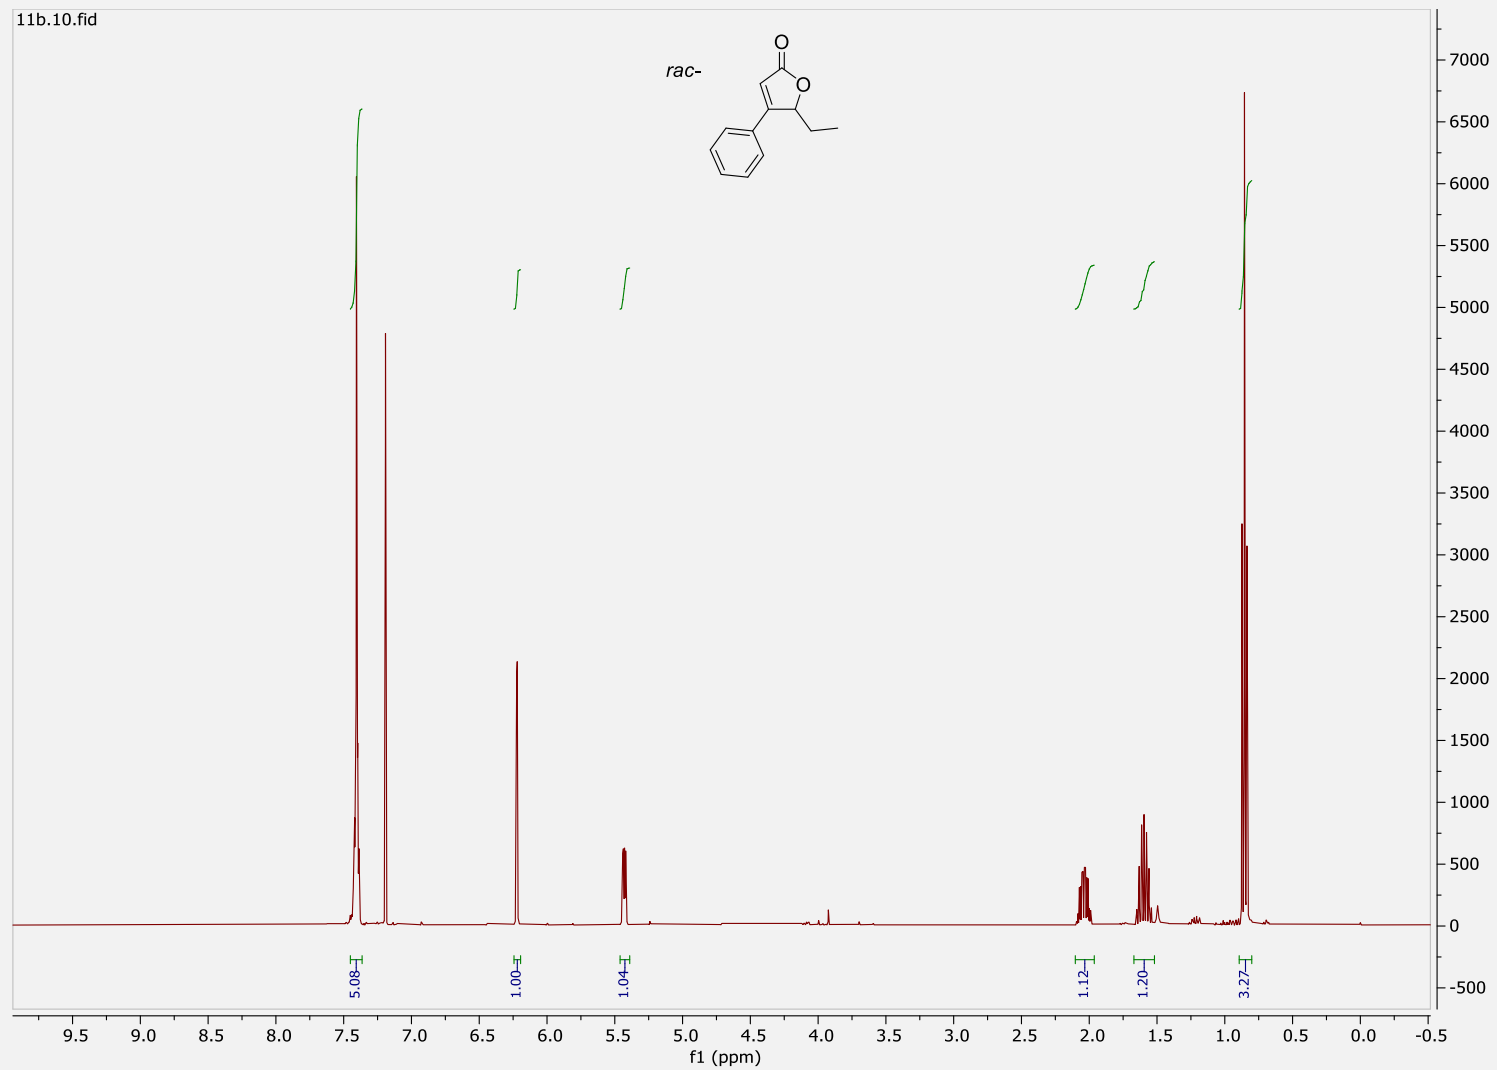

Dec04-2022.21.fid  
Exp. 11 Compound 3

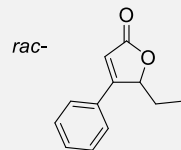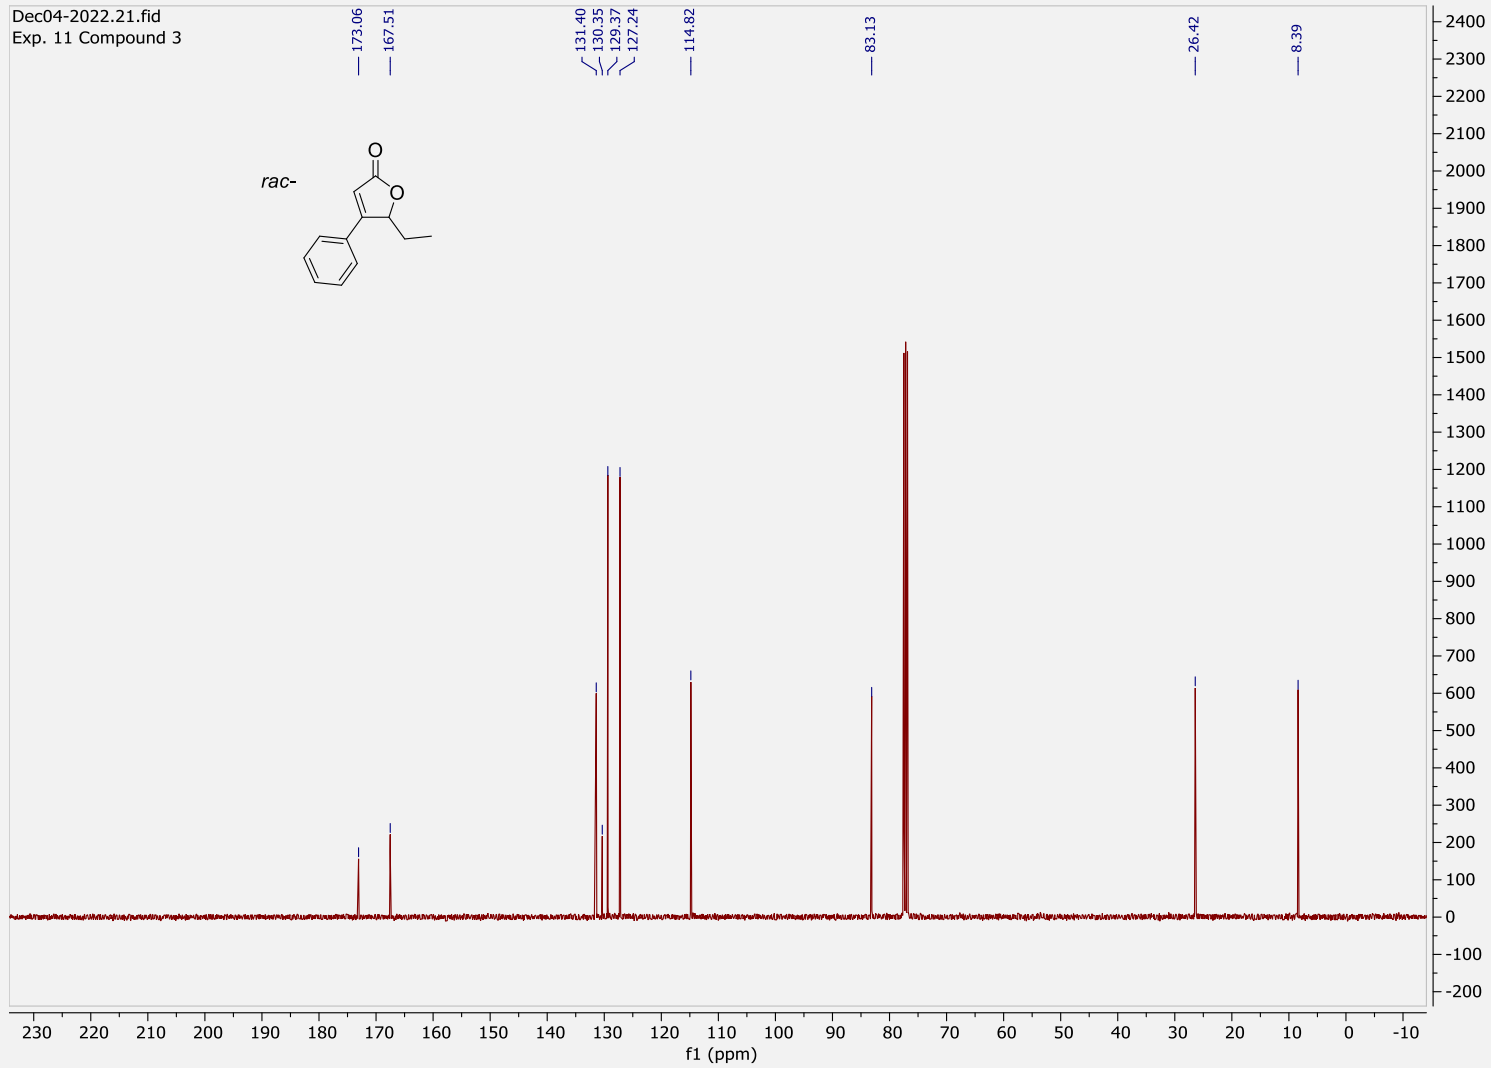

Jan07-2023.10.fid  
Exp. 4 Compound 3

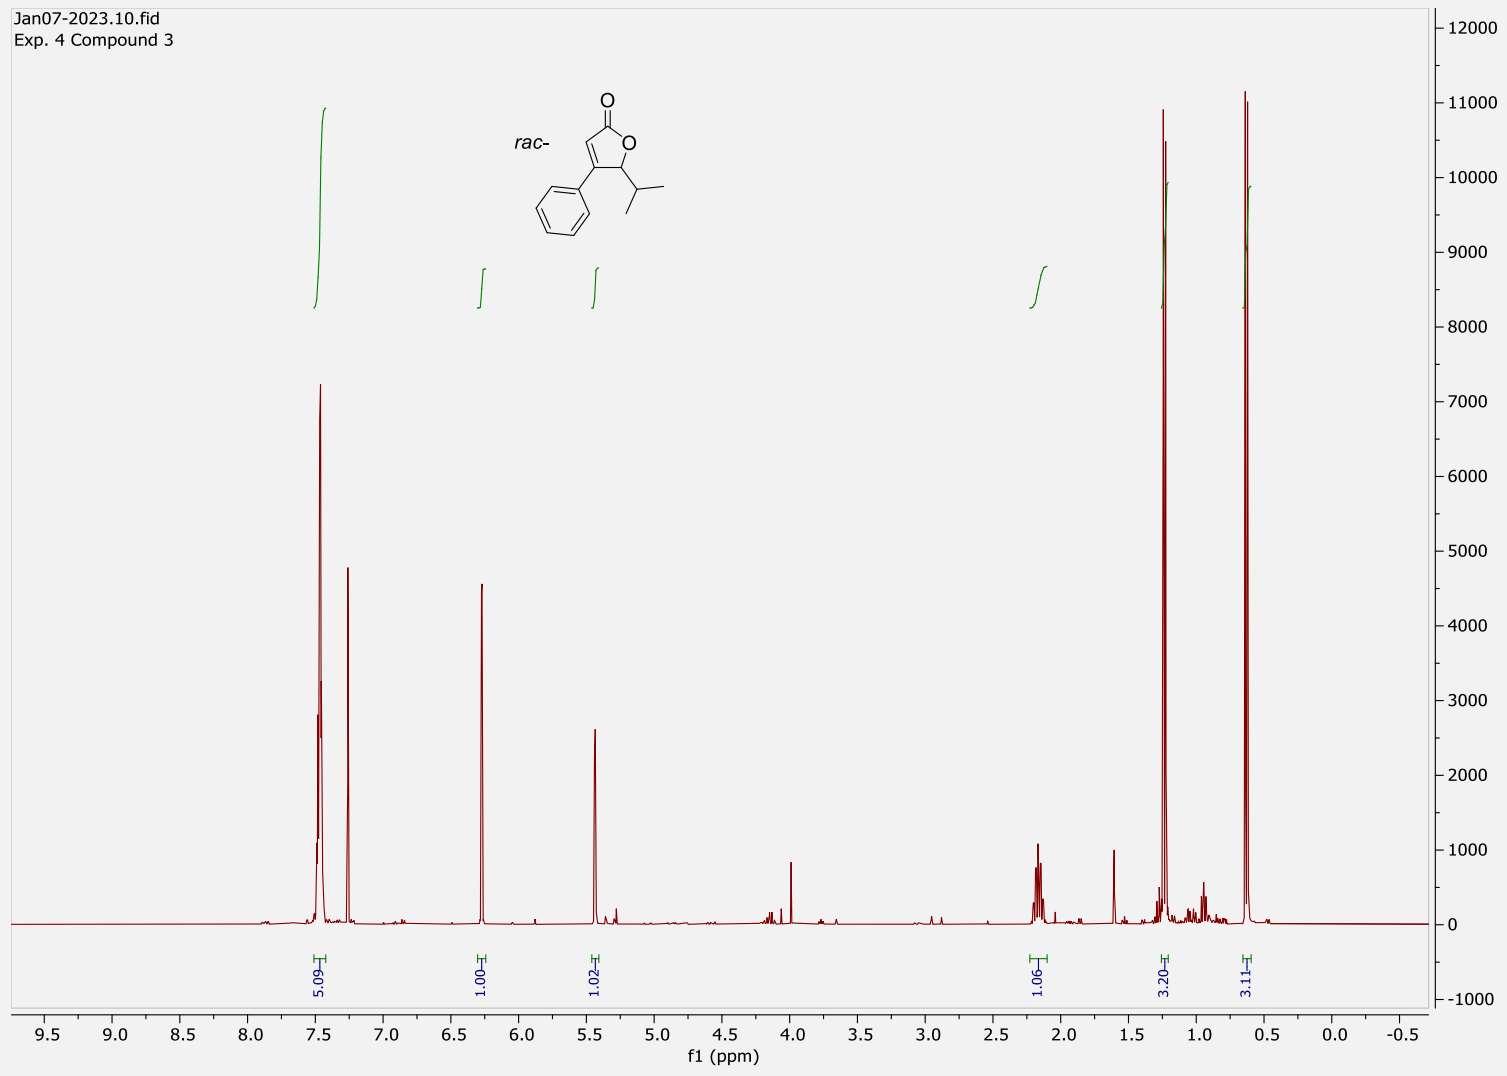

Nov08-2022.21.fid  
Exp. 4 Compound 3

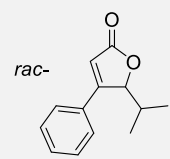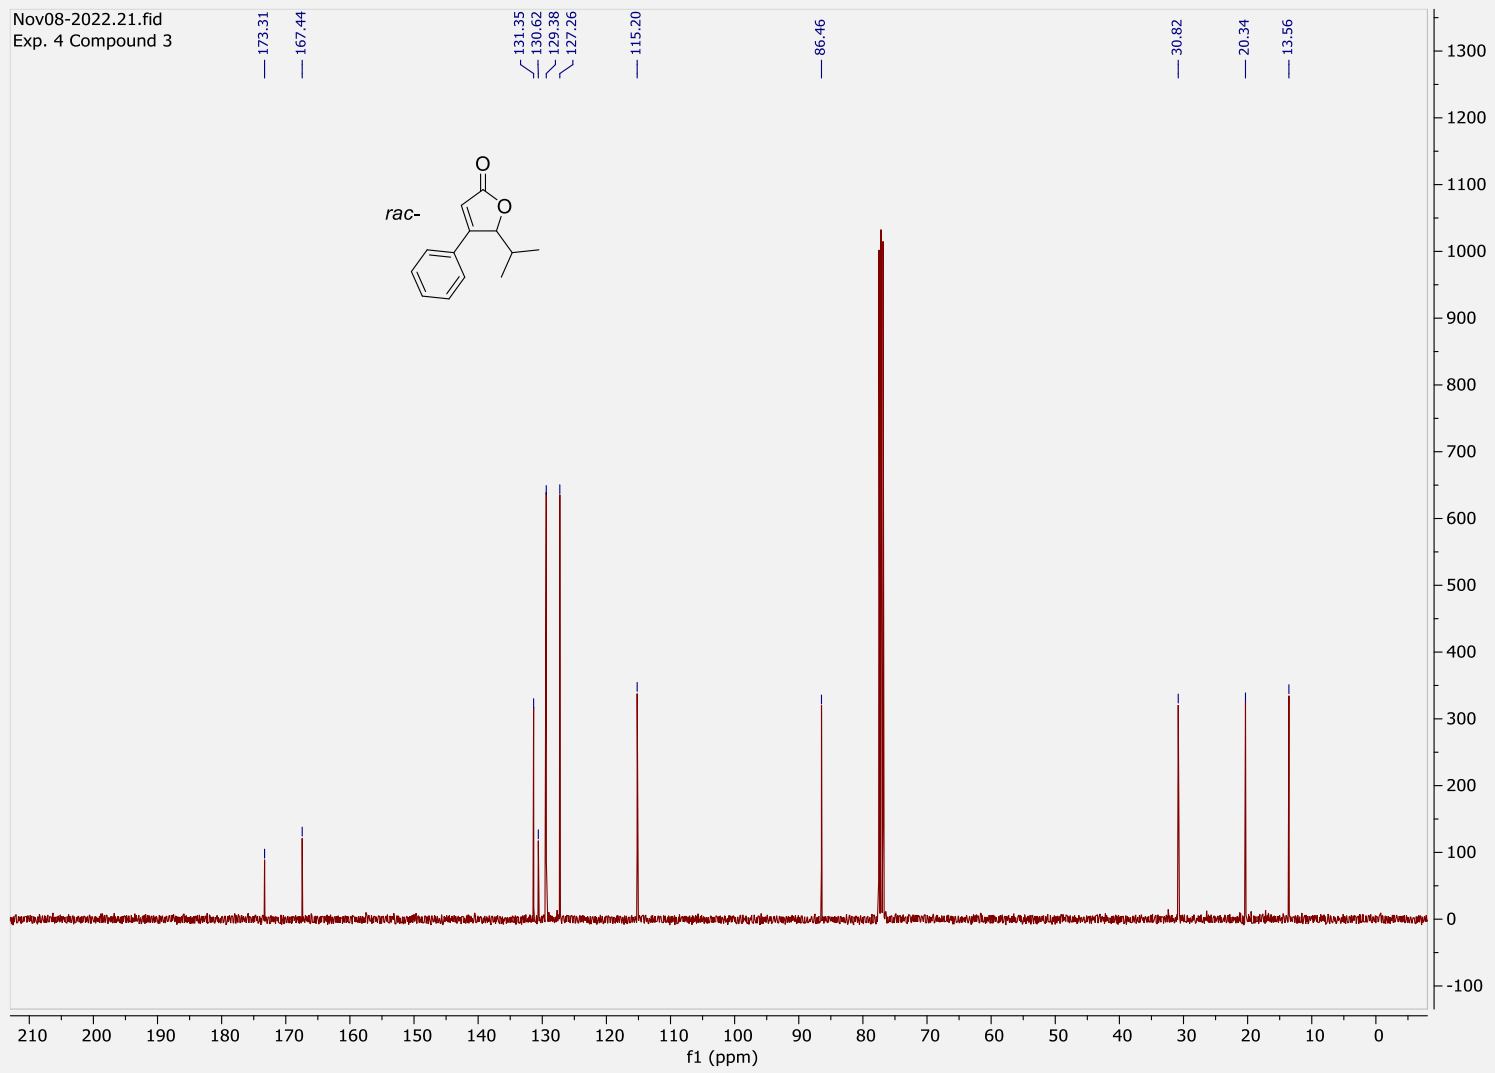

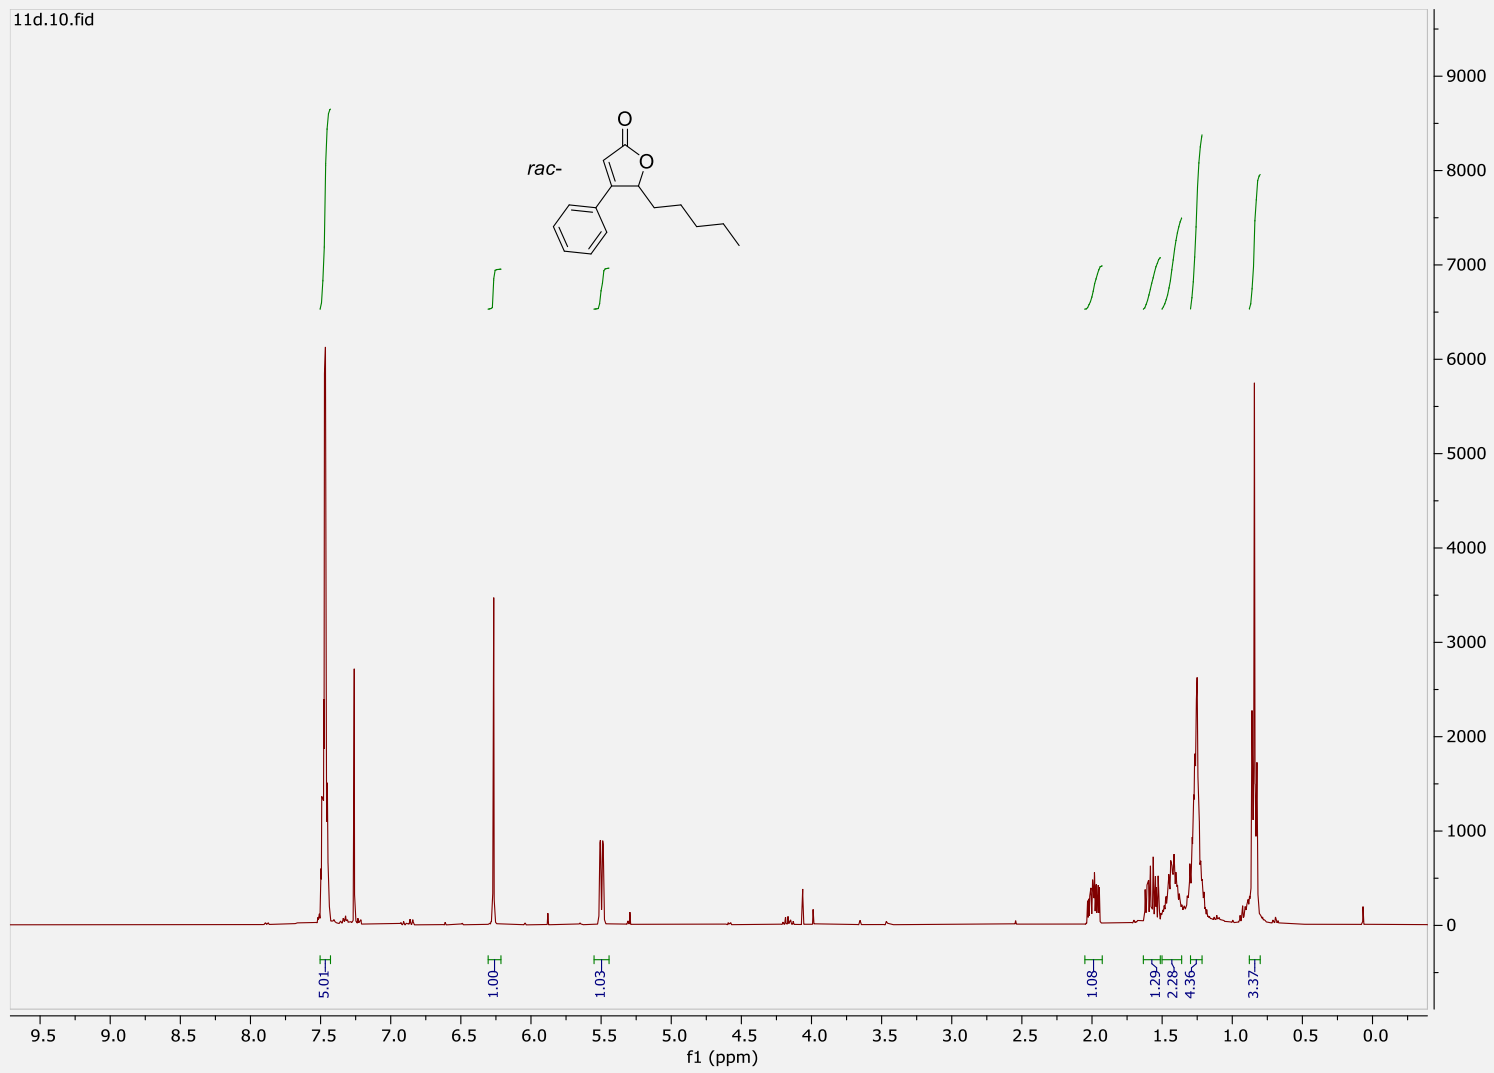

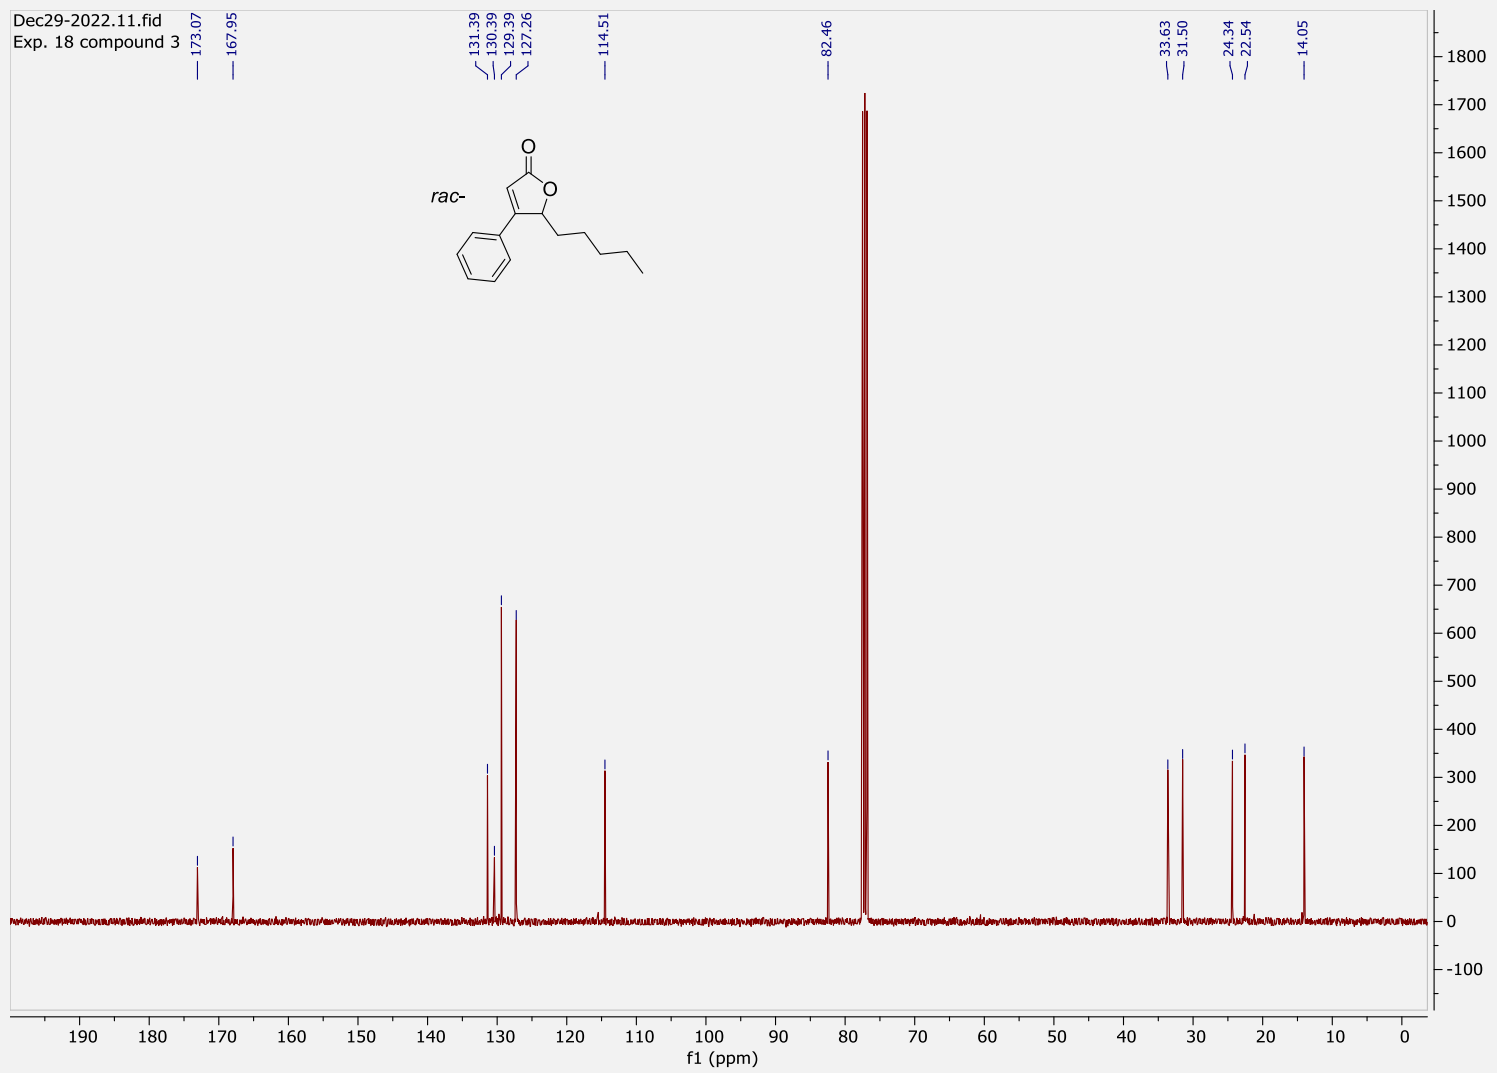

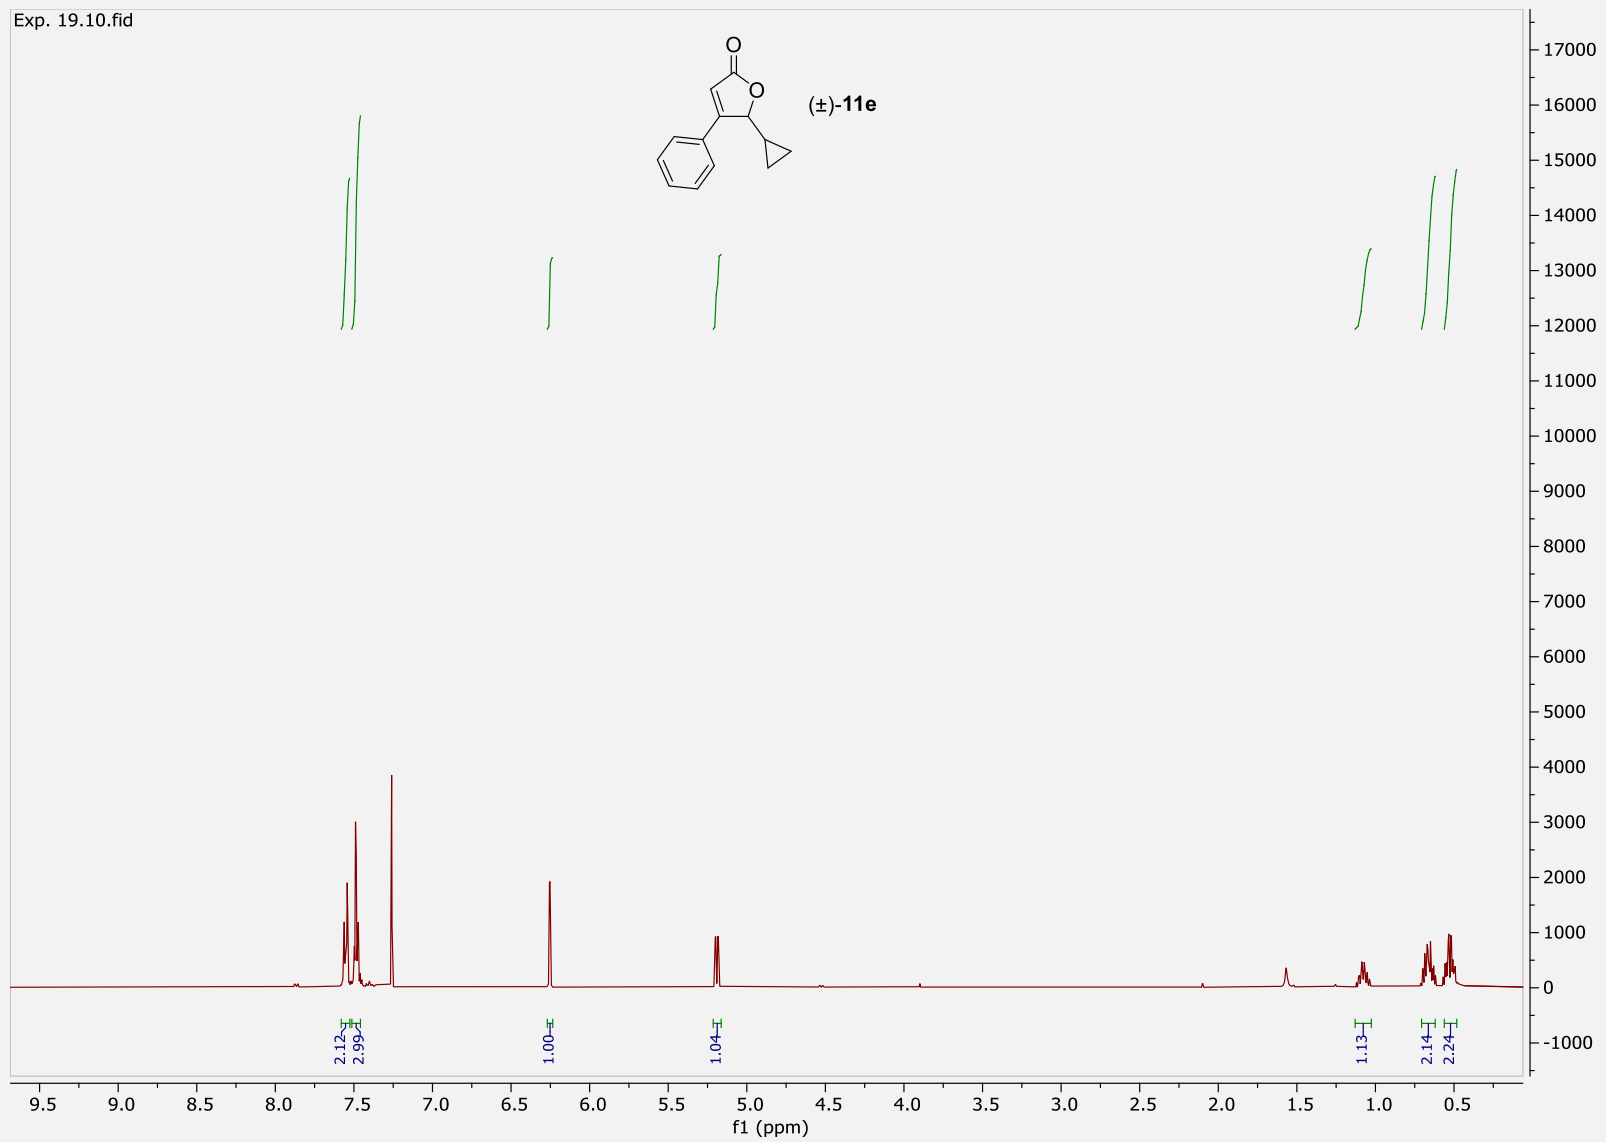

Dec30-2022.11.fid  
Exp. 19 compound 3

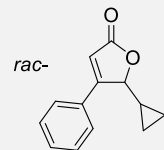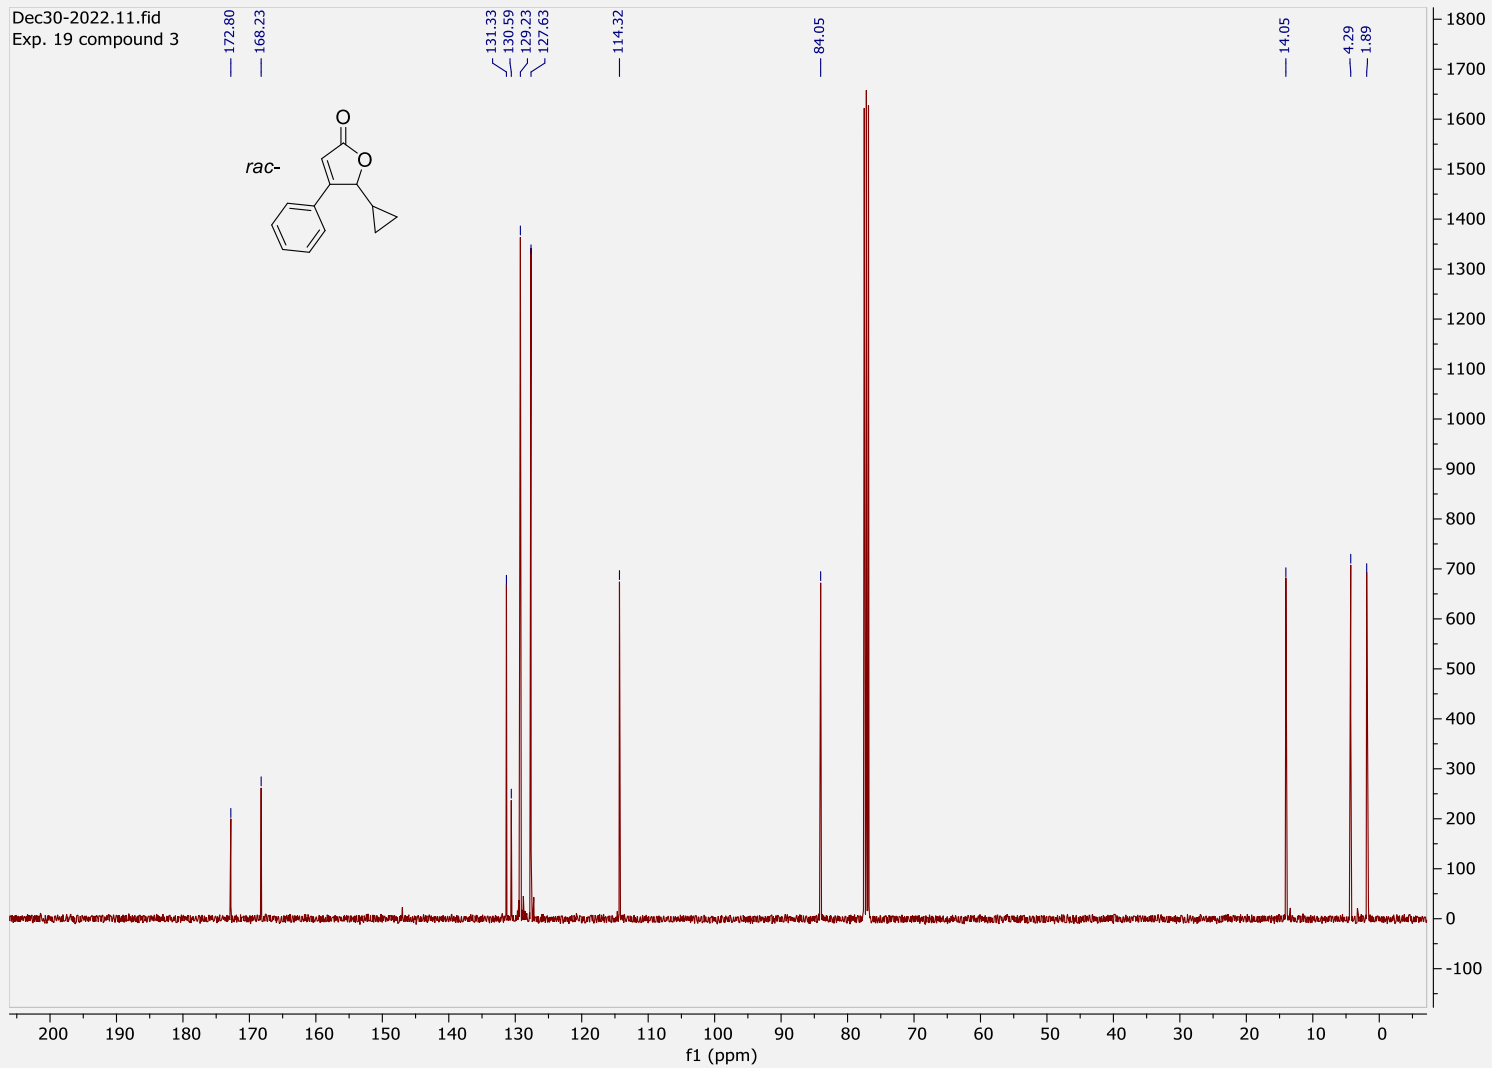



Jan07-2023.10.fid  
Exp. 22 Compound 3

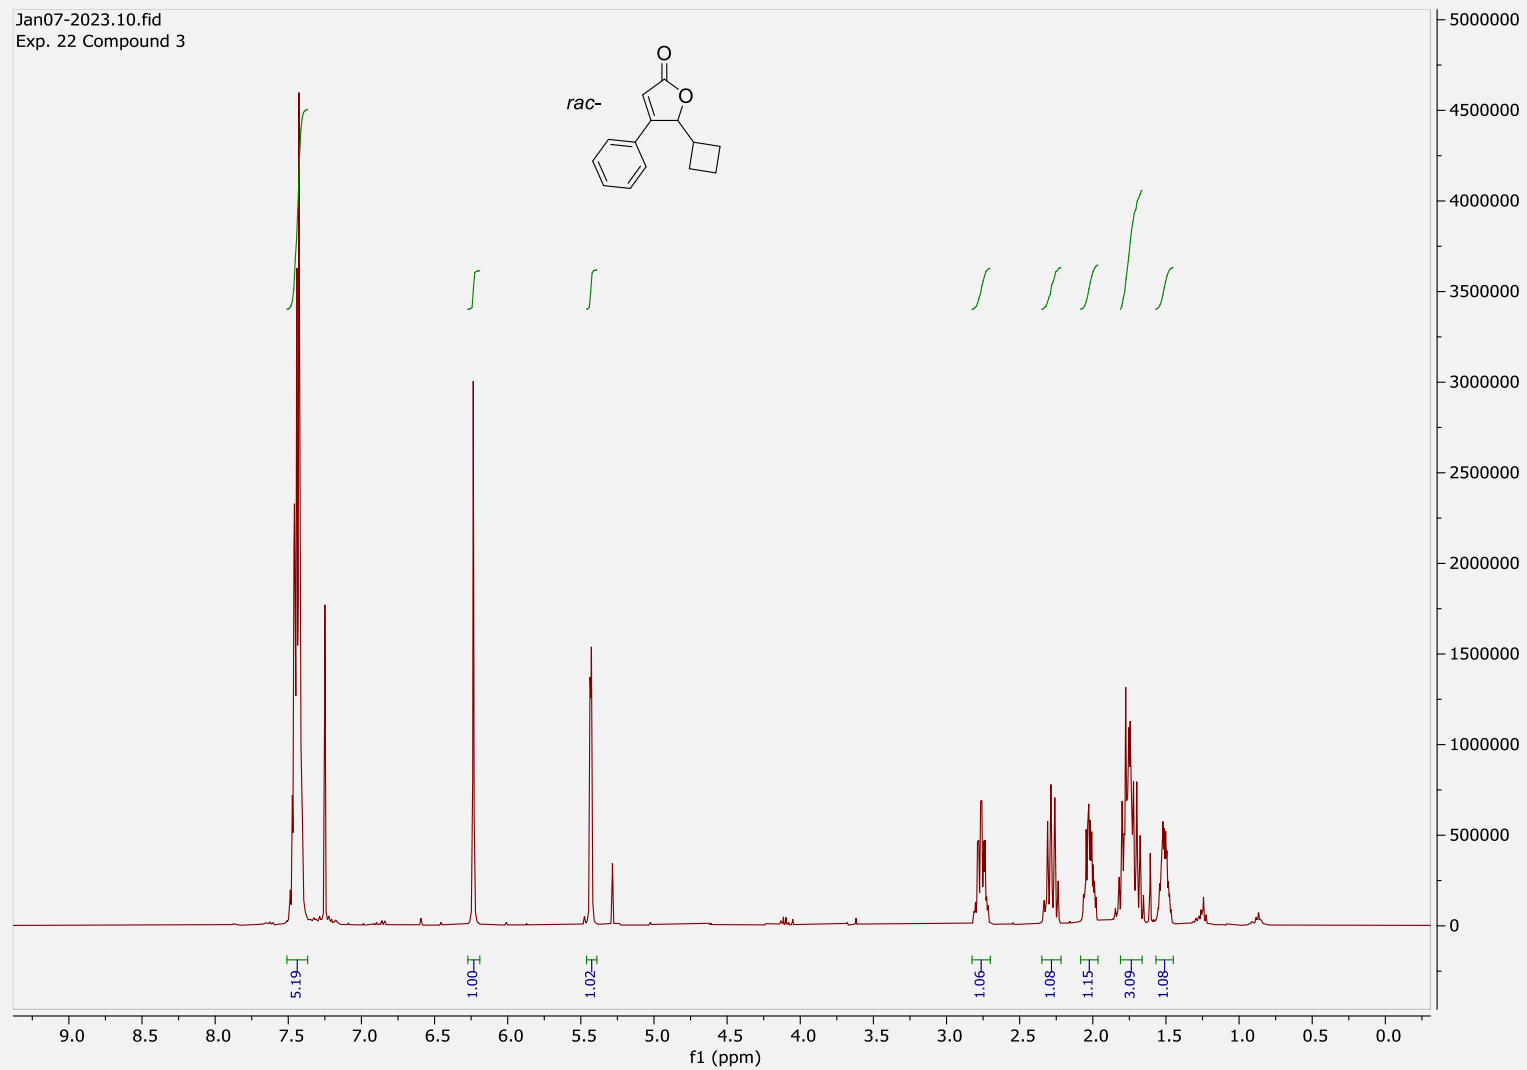

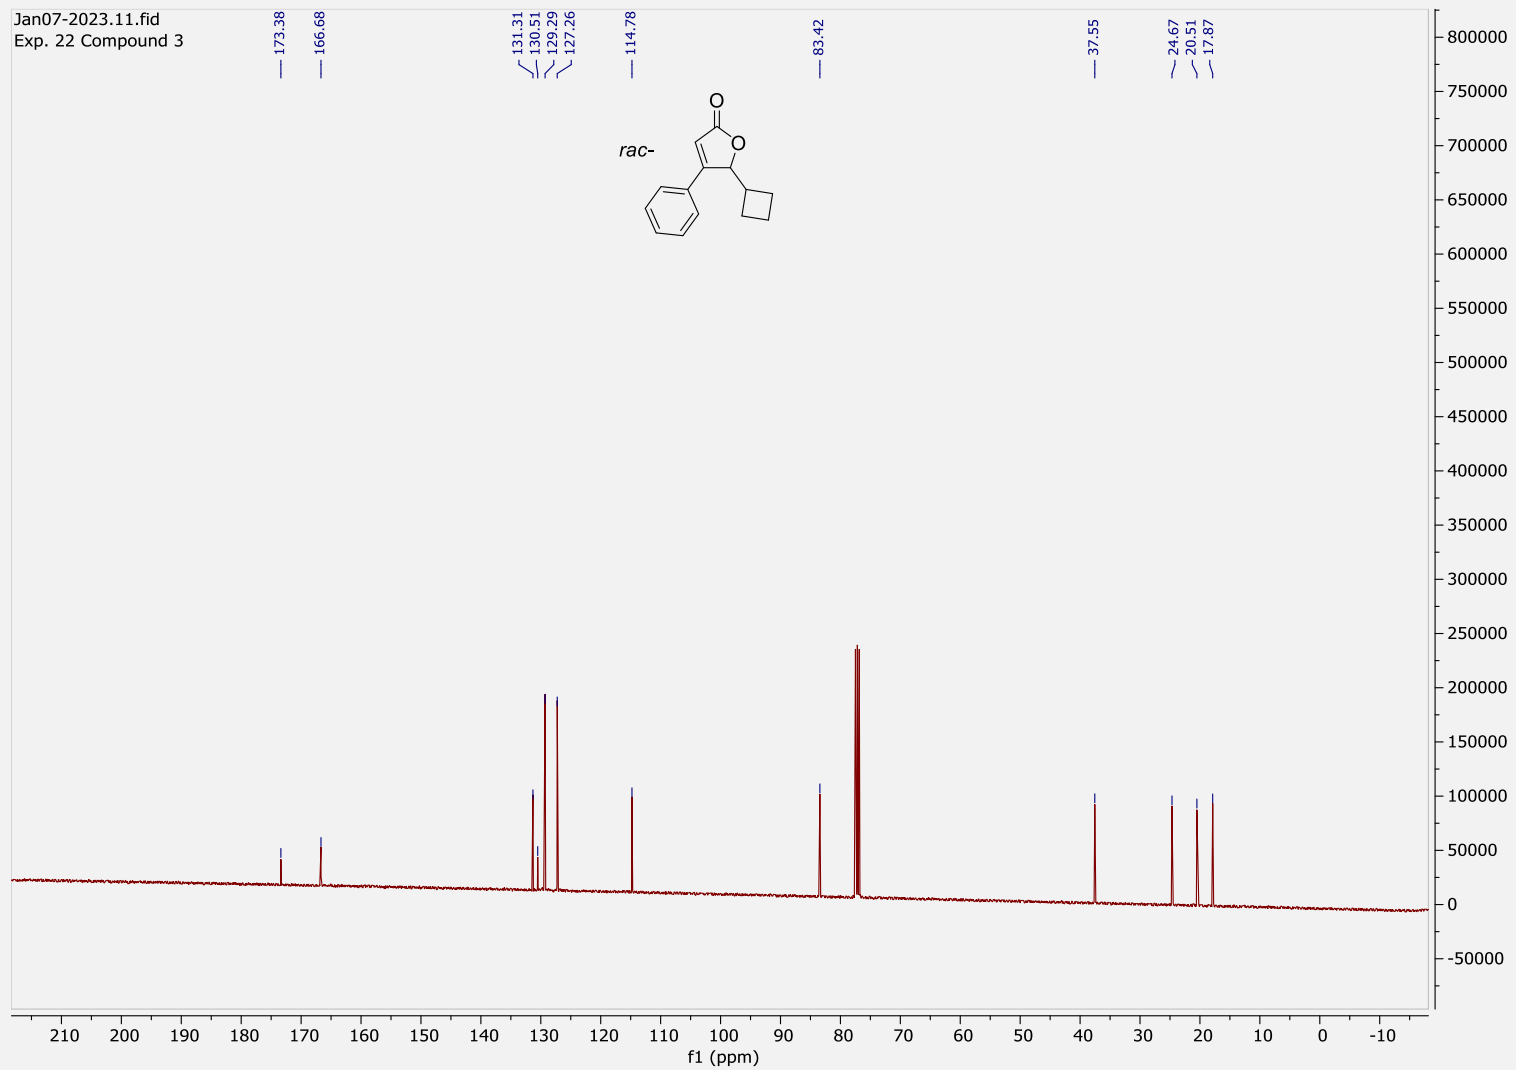

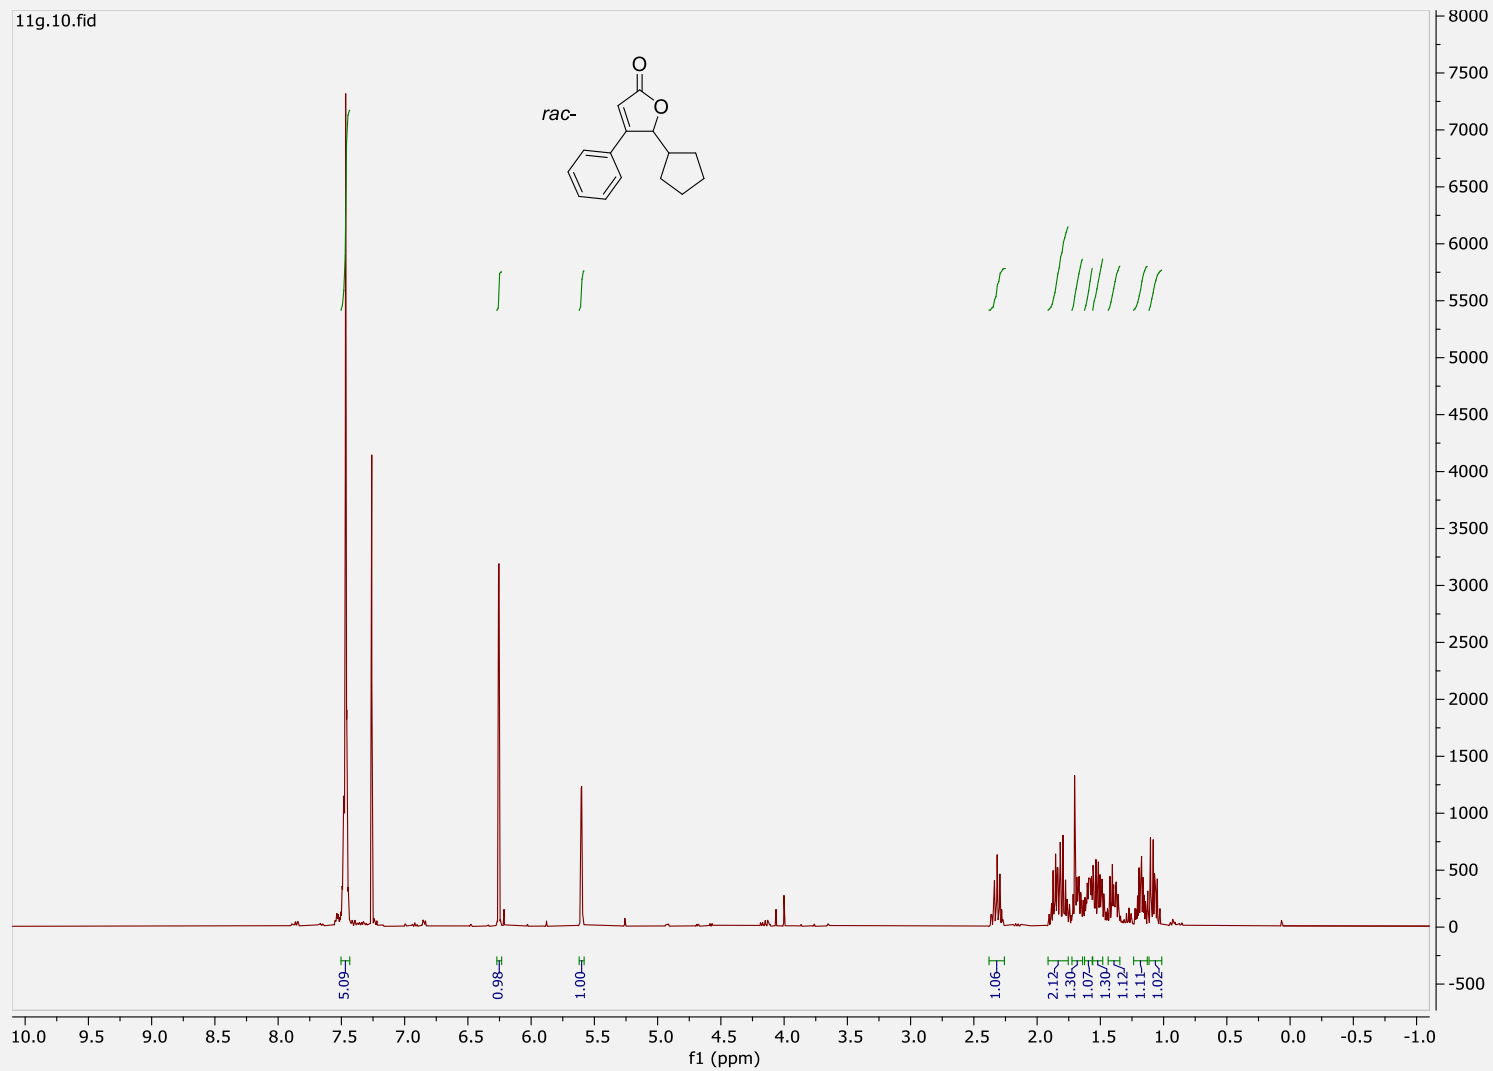

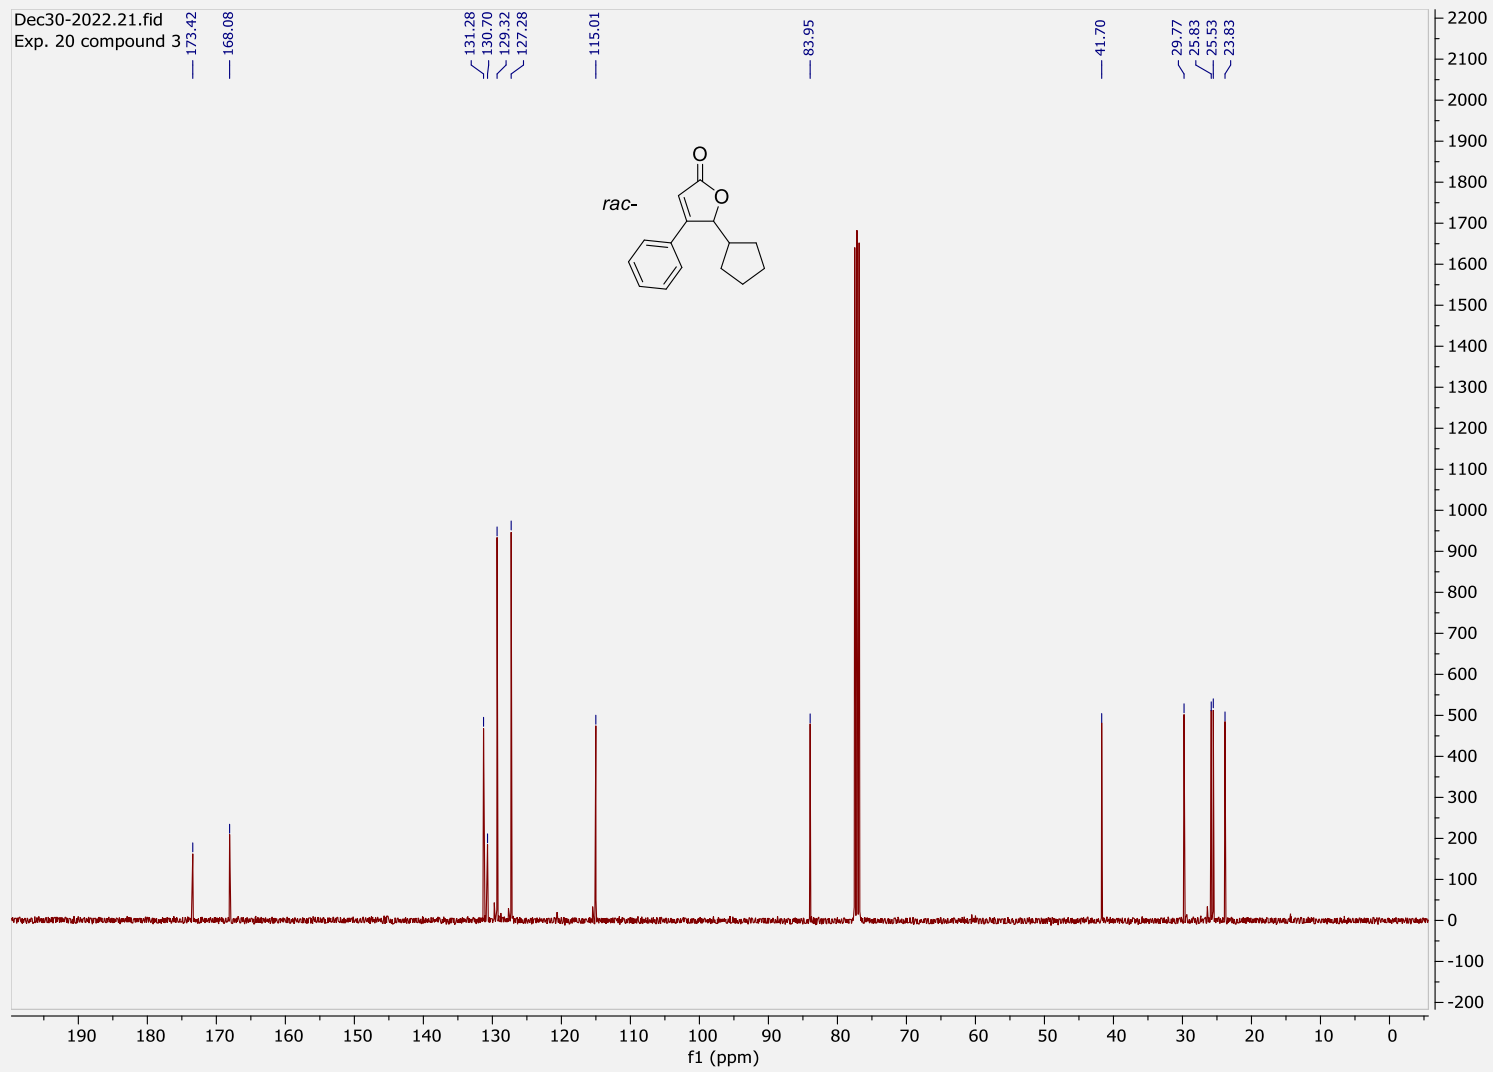

Exp. 13.10.fid

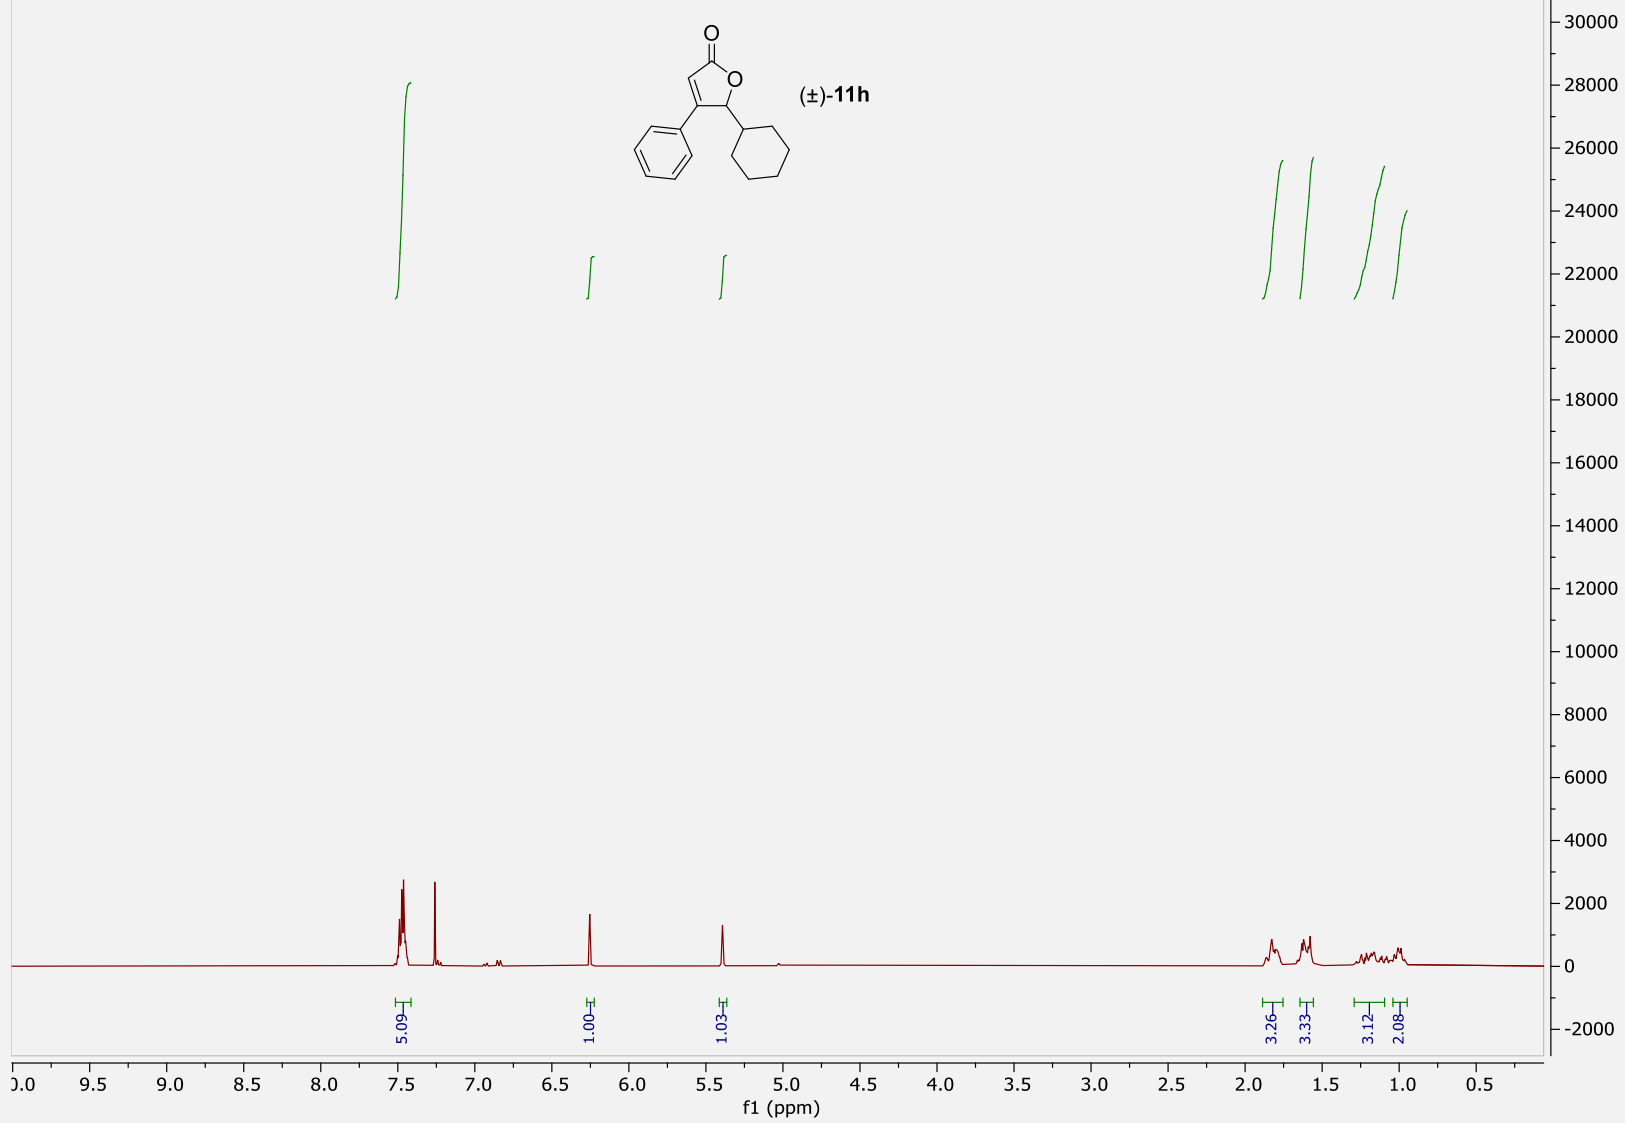

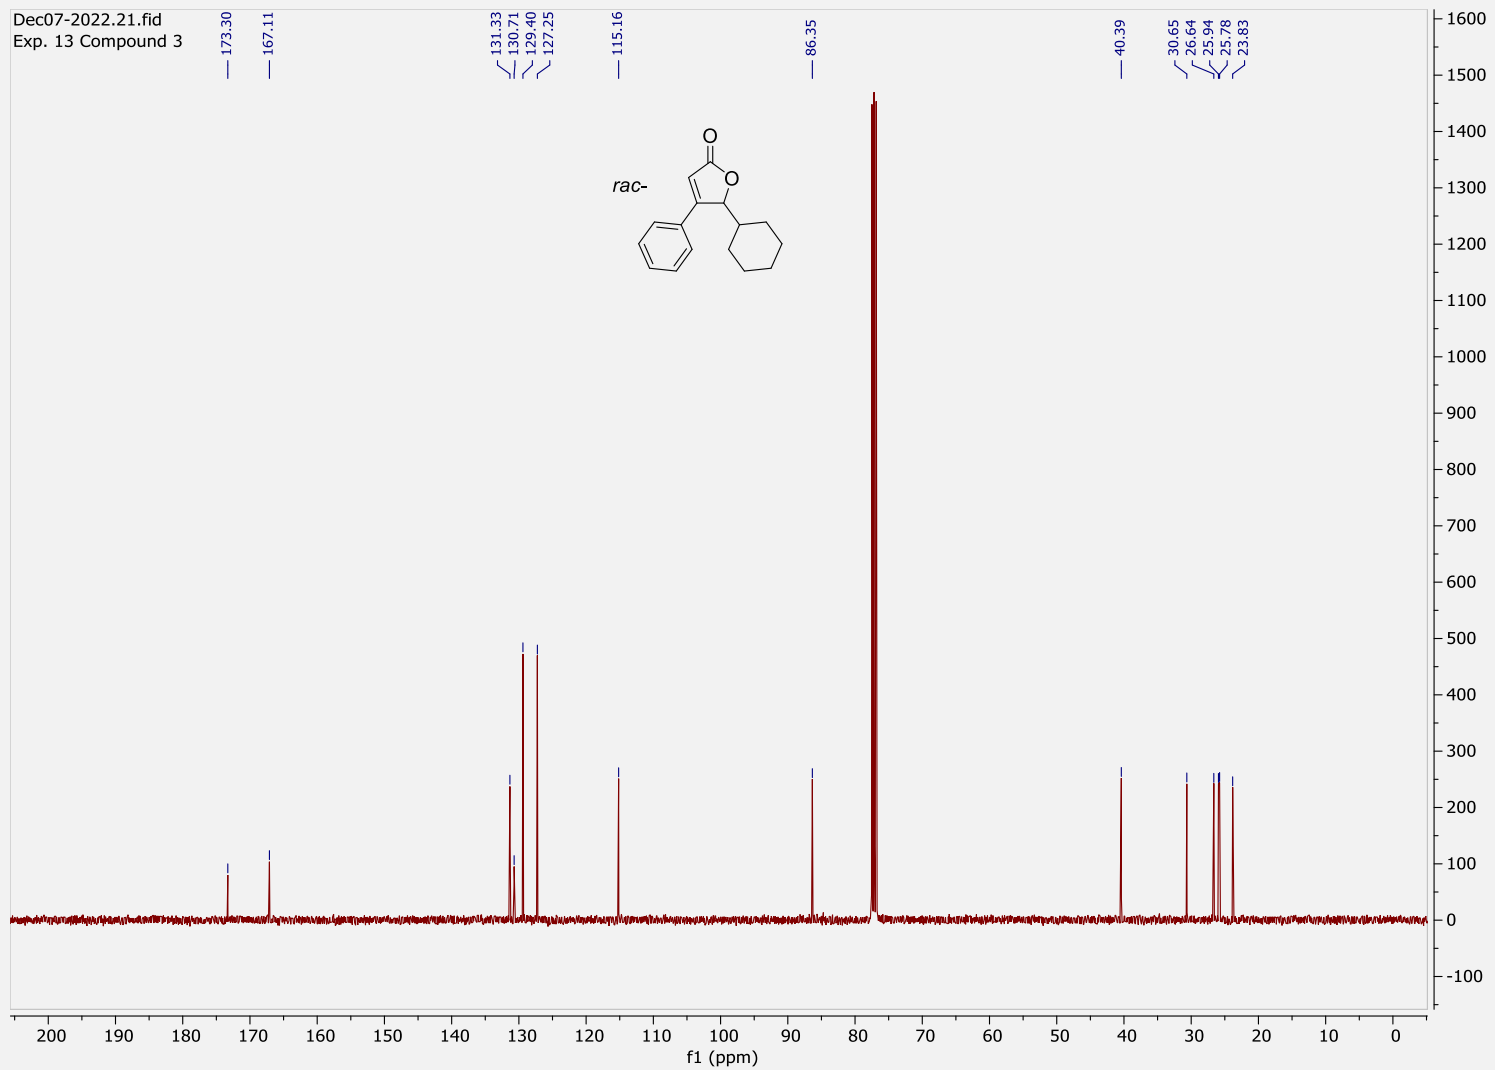

Exp. 34.10.fid

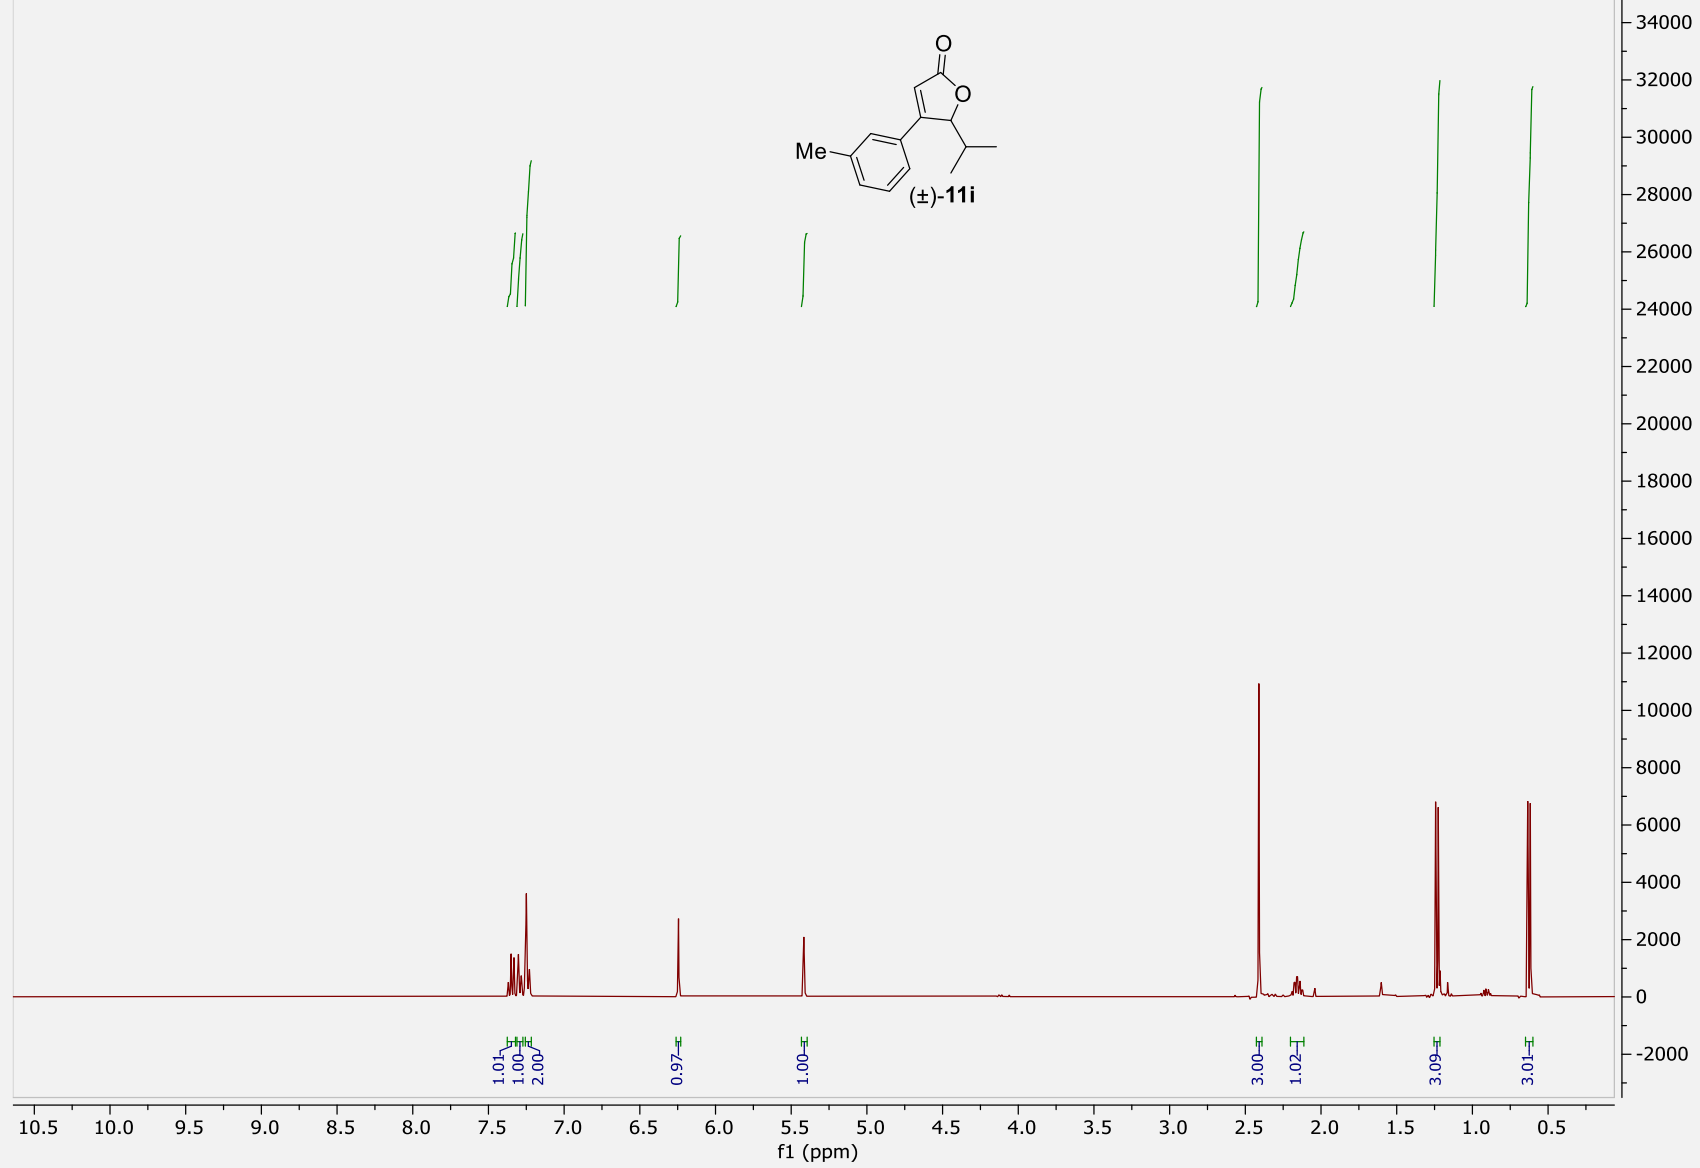

S71

Jan28-2023.11.fid  
Exp. 34

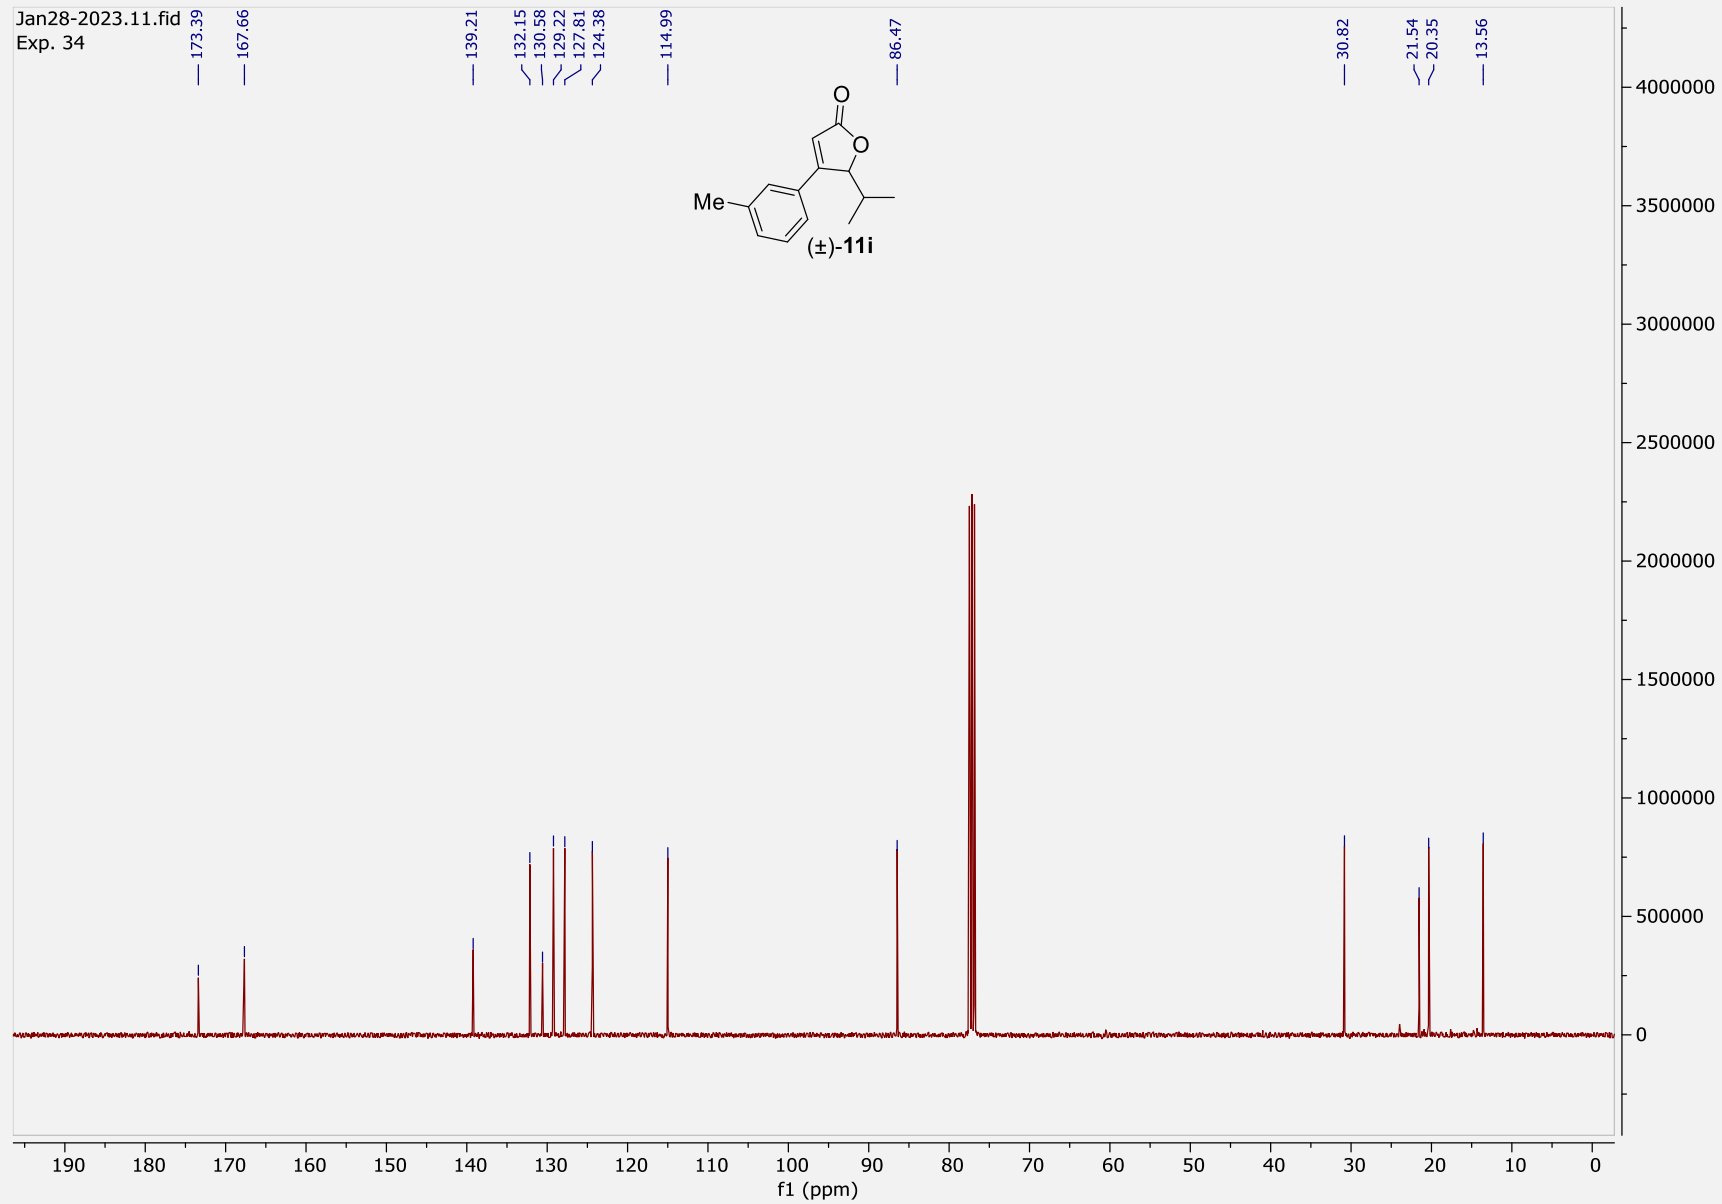



Exp. 32.10.fid  
user Oluwarotimi Ojo  
PROTON.GLA CDCl3 /u oluajo 21

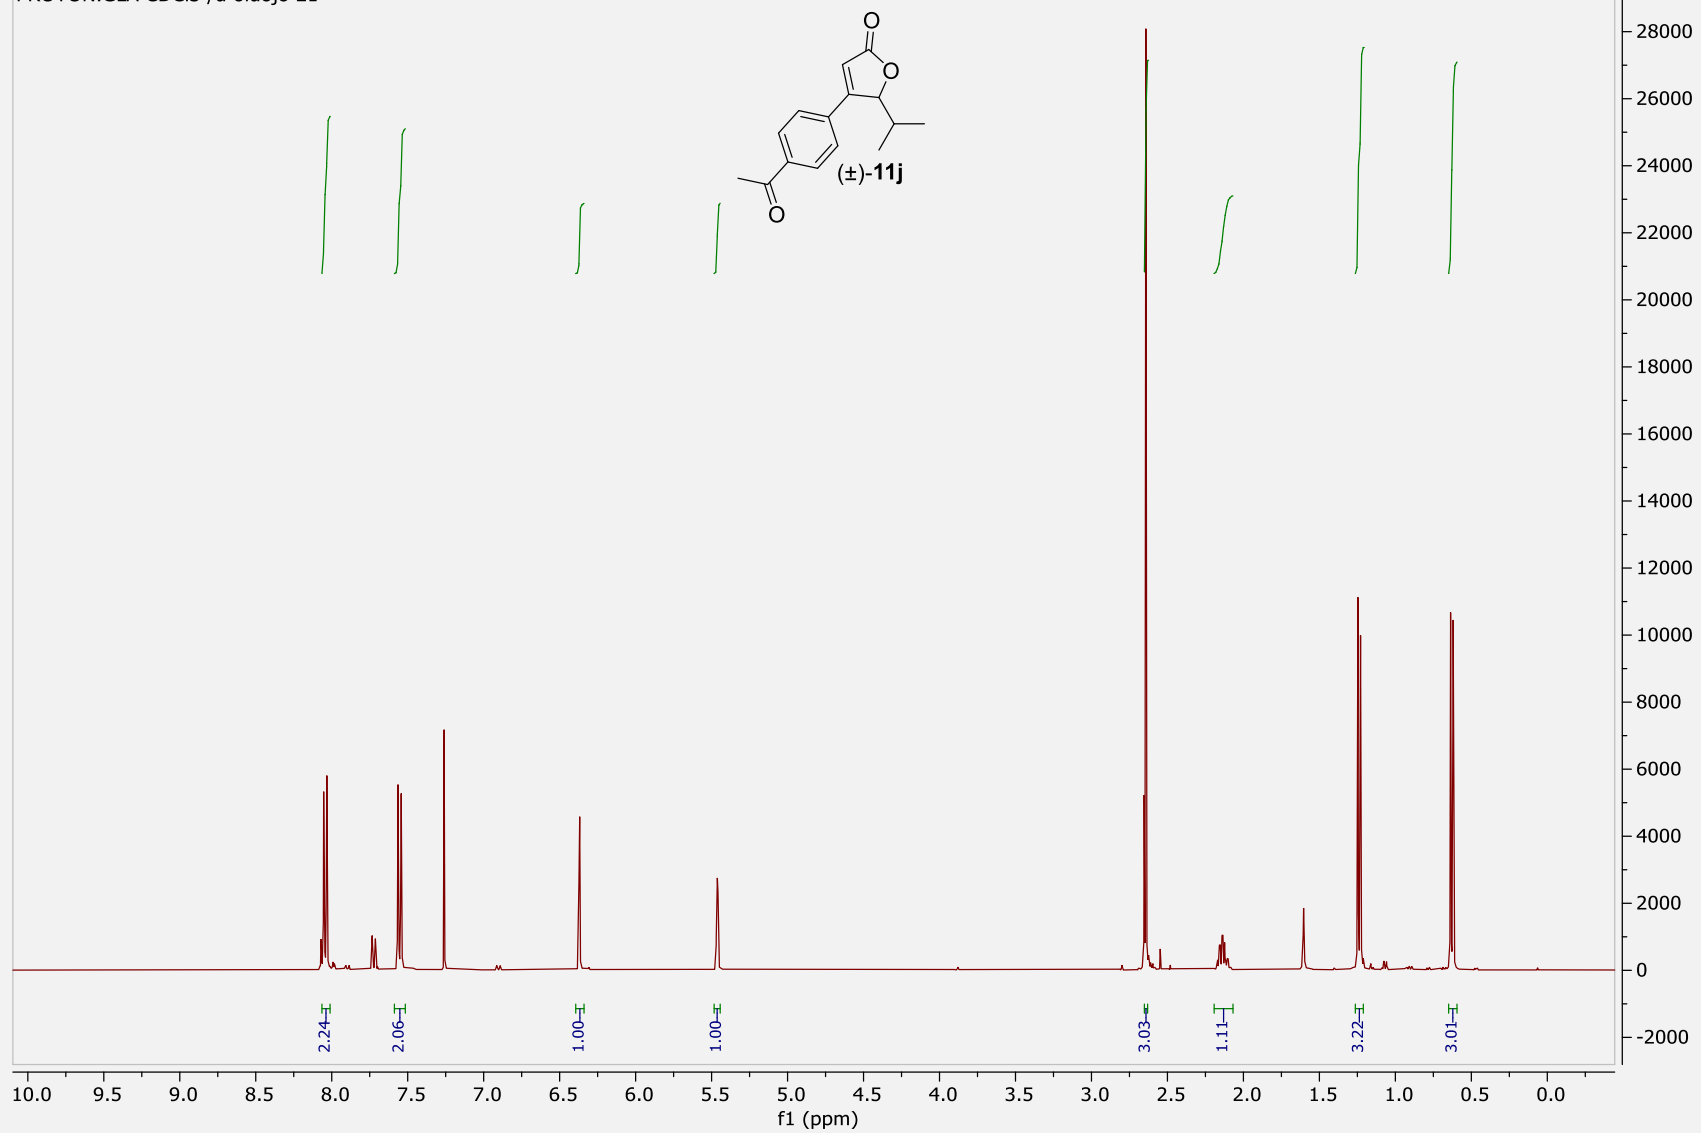

Jan26-2023.21.fid  
Exp. 32

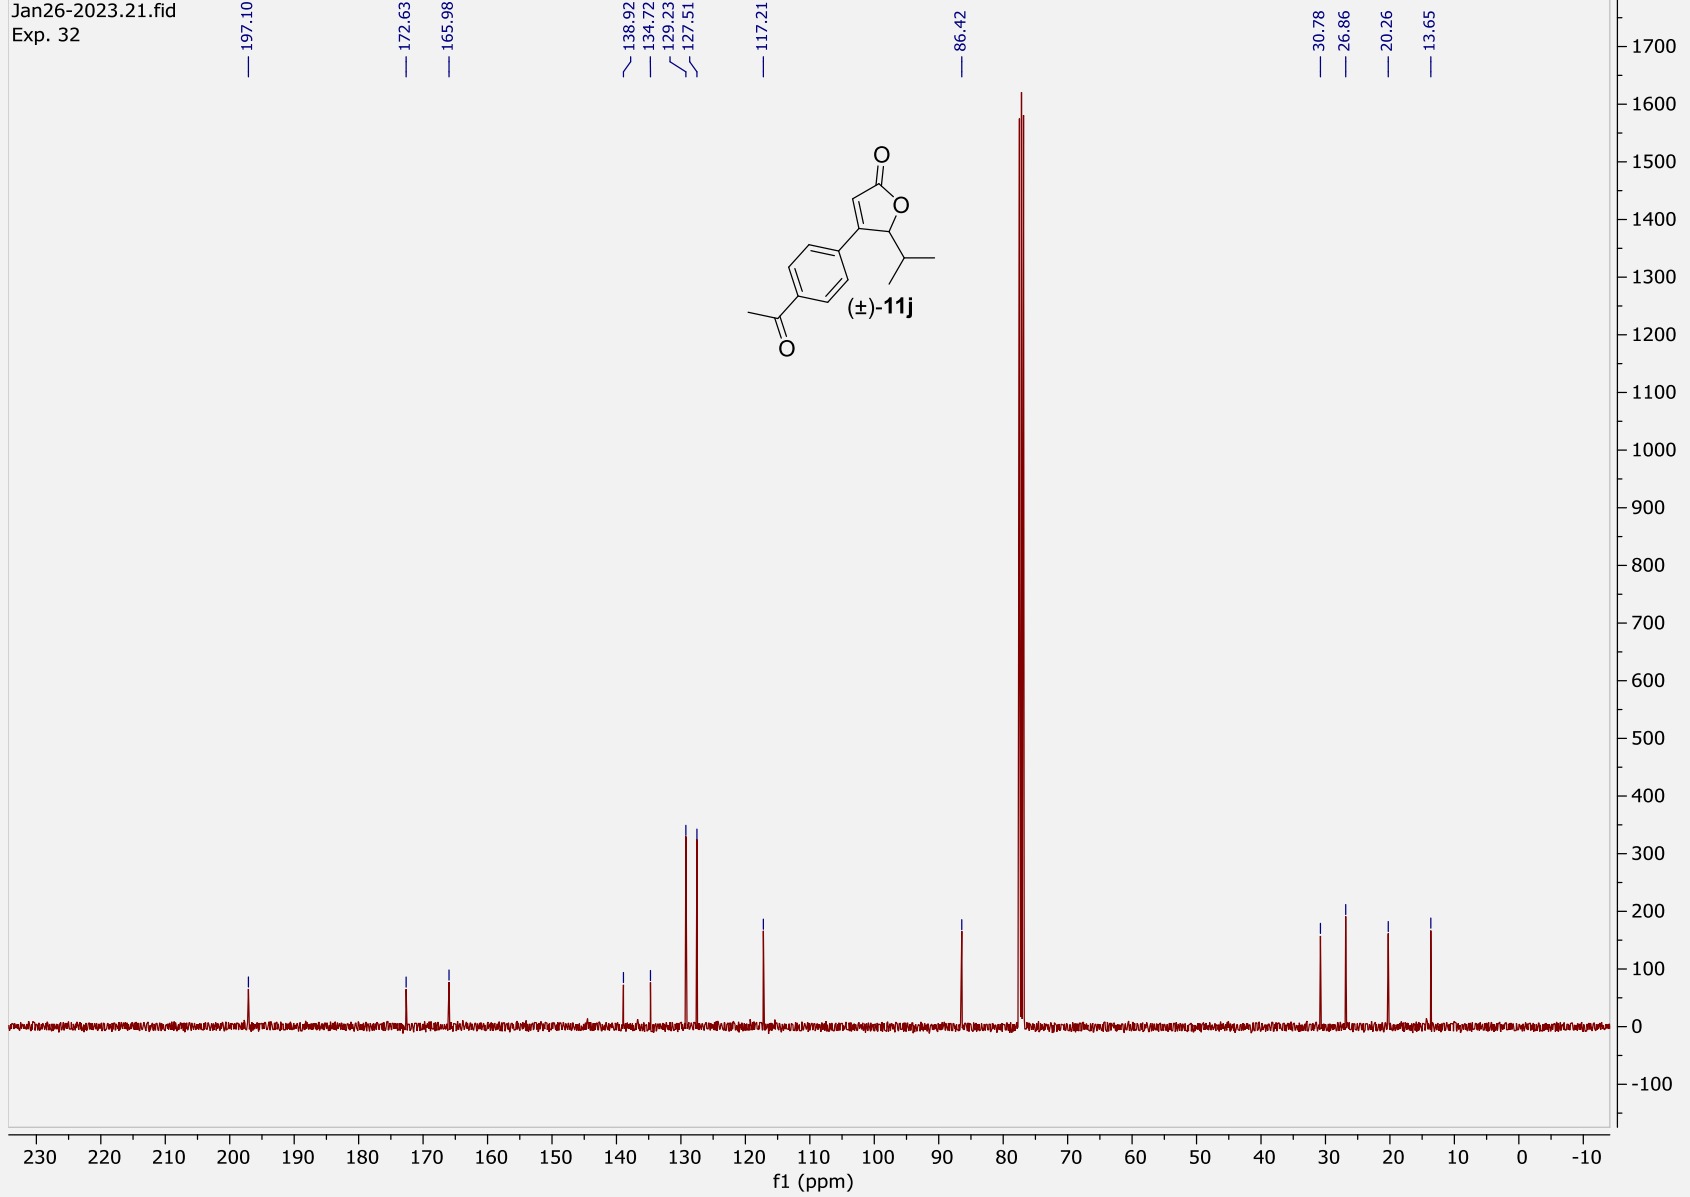

Exp. 30.10.fid

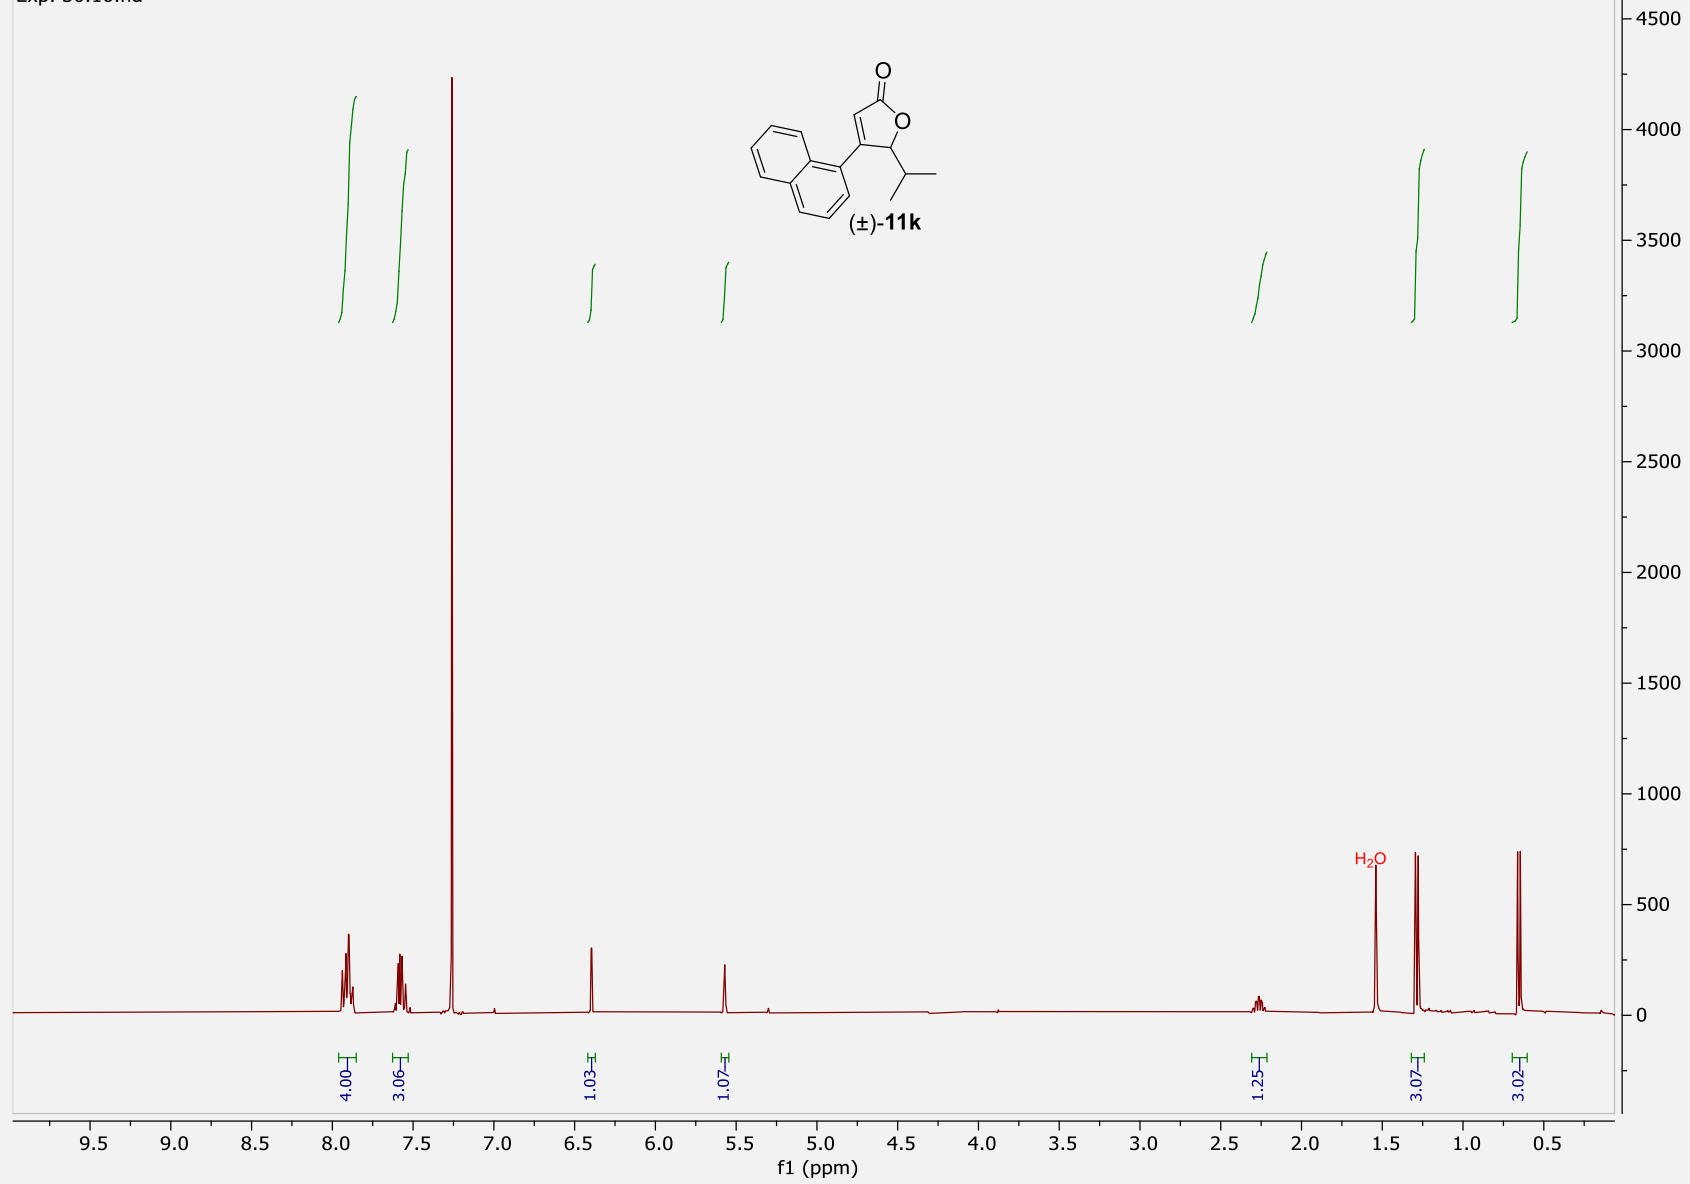

S75

Jan26-2023.11.fid  
Exp. 30

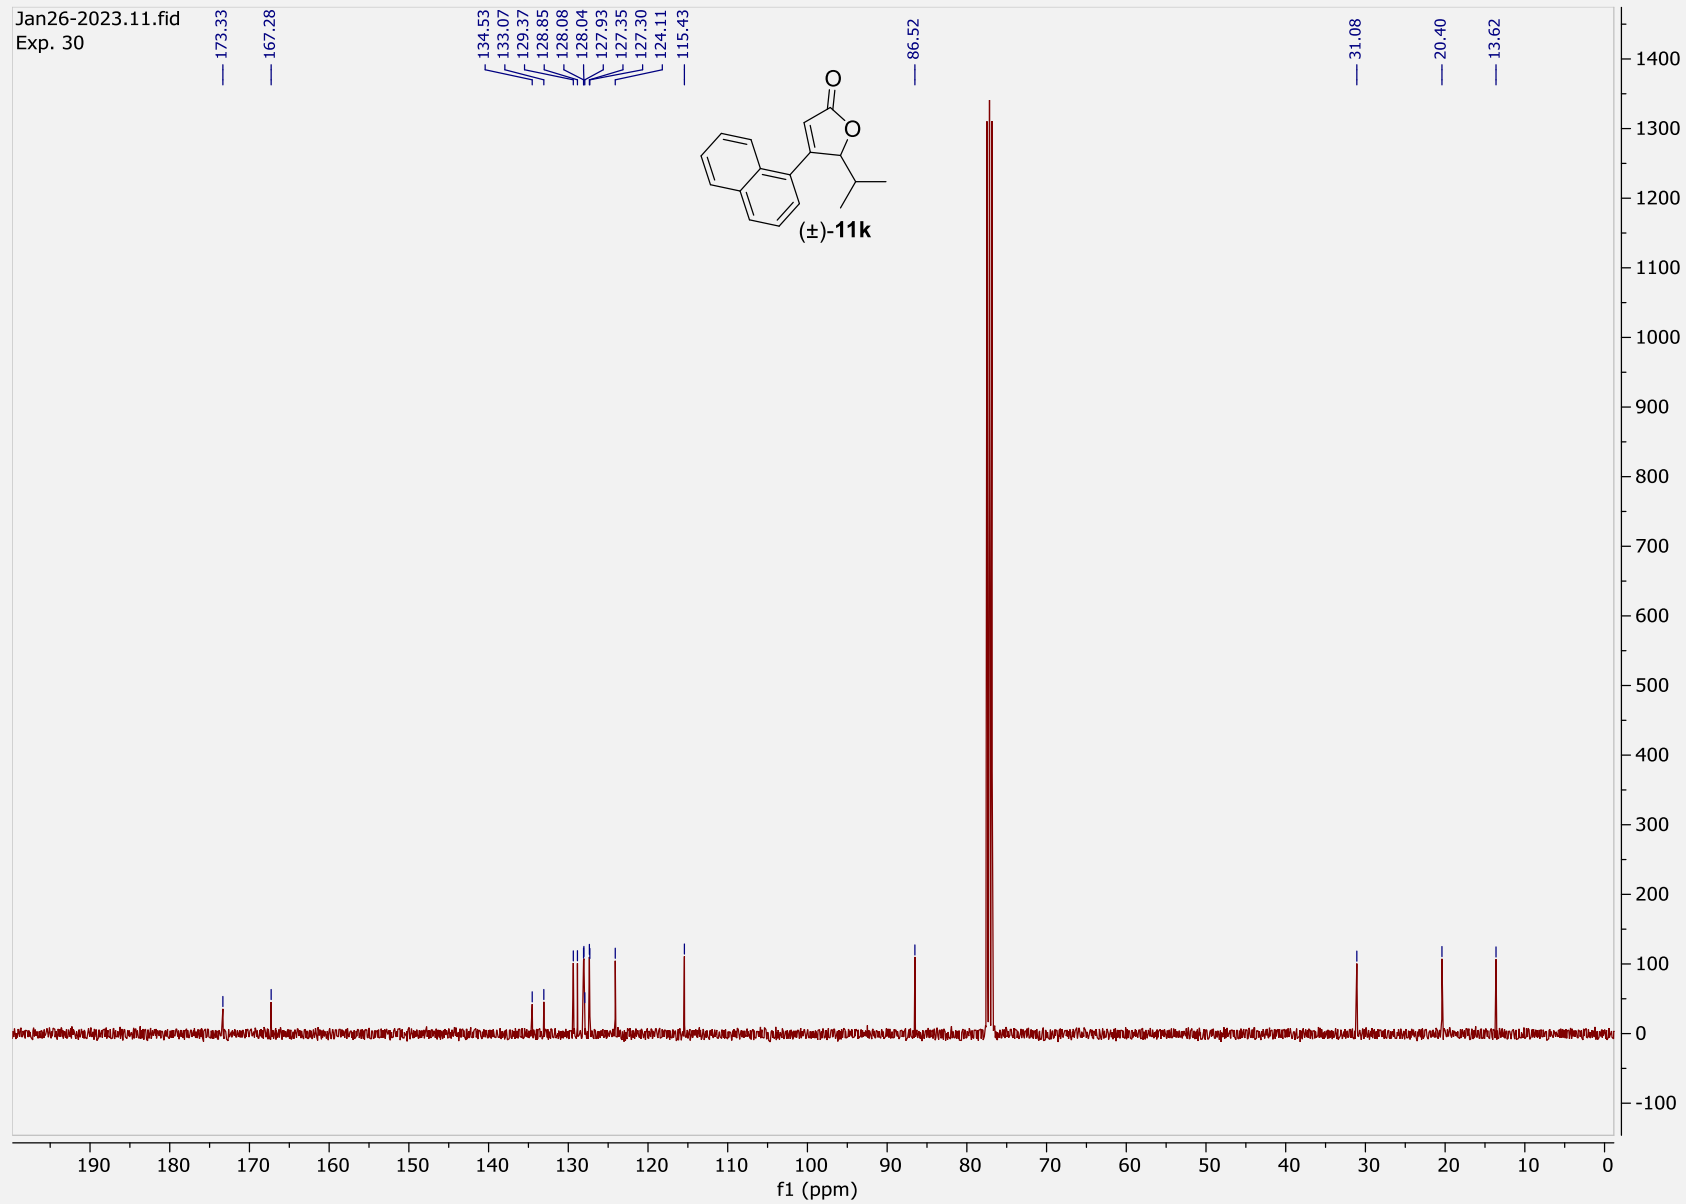

S76

Exp. 37.20.fid

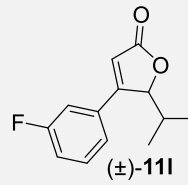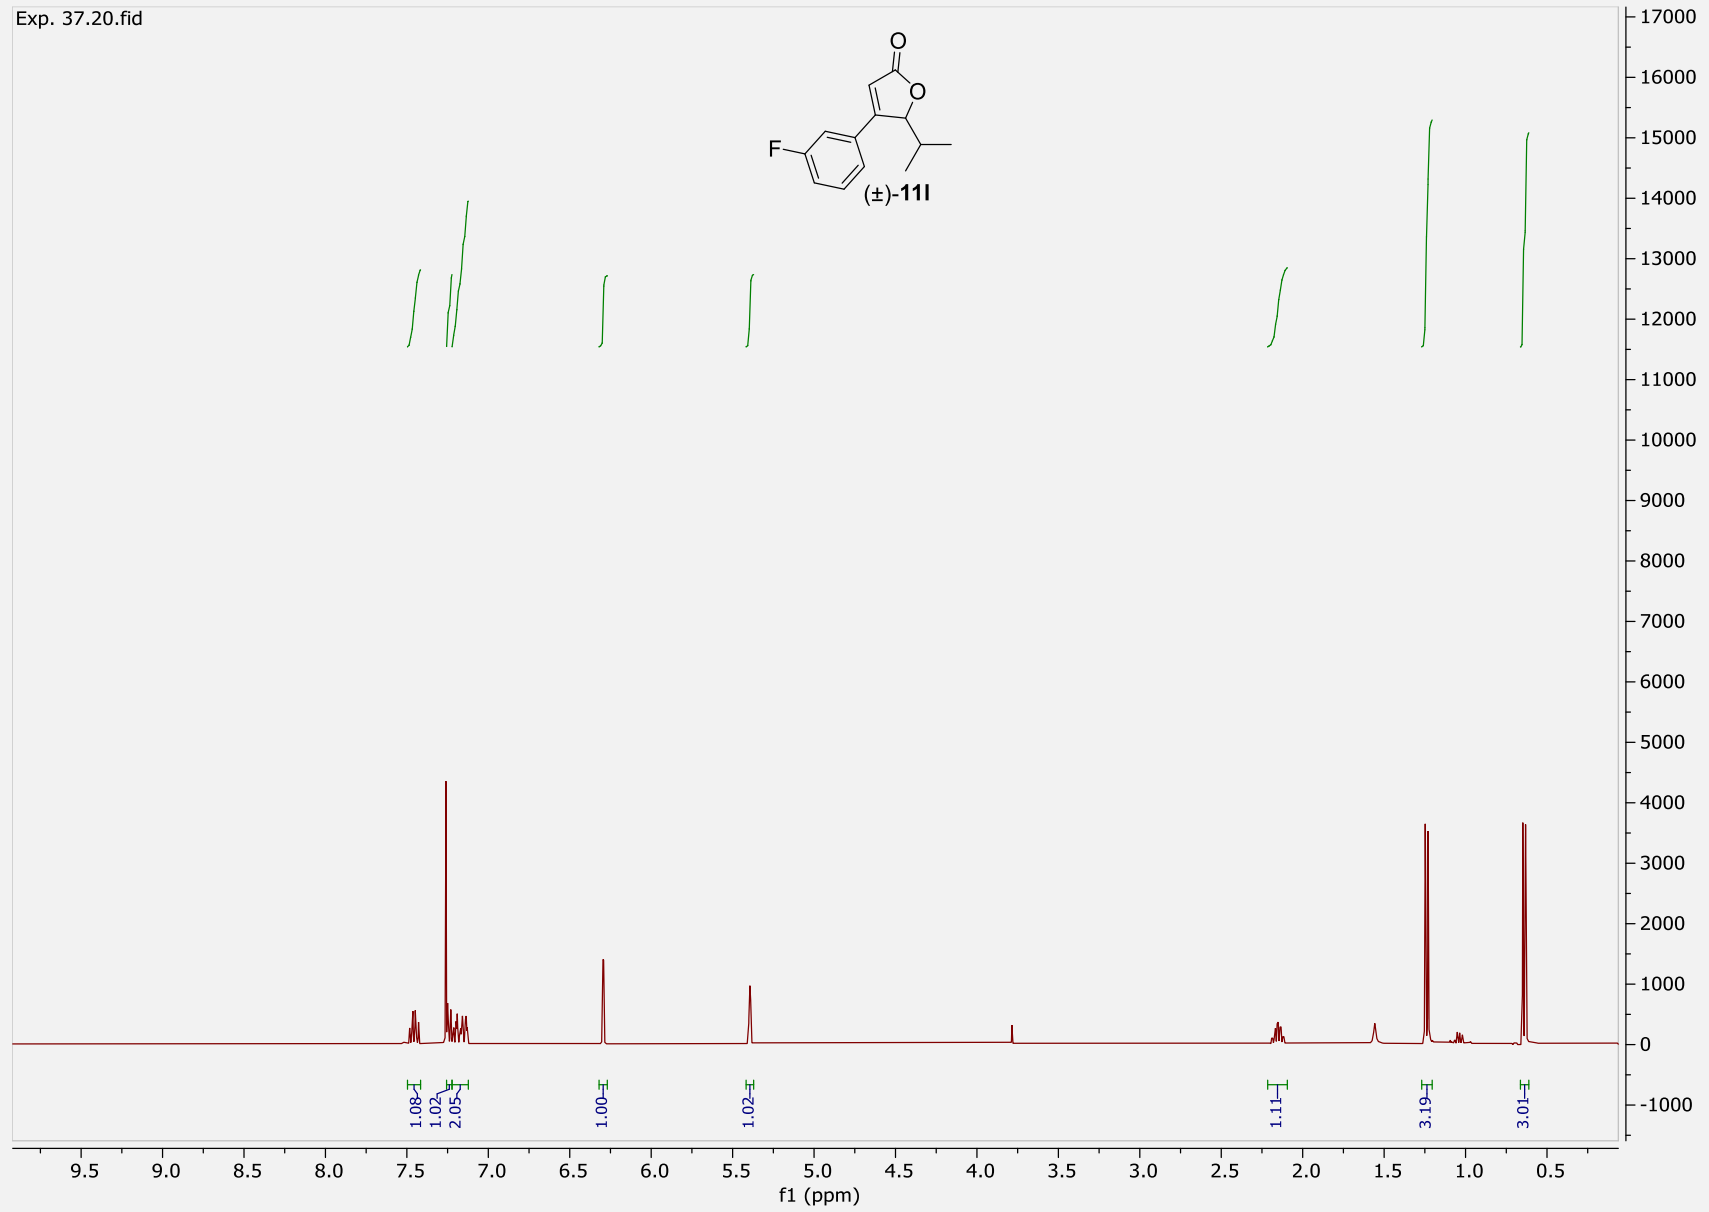

S77



Feb18-2023.21.fid  
Exp. 37 3-F

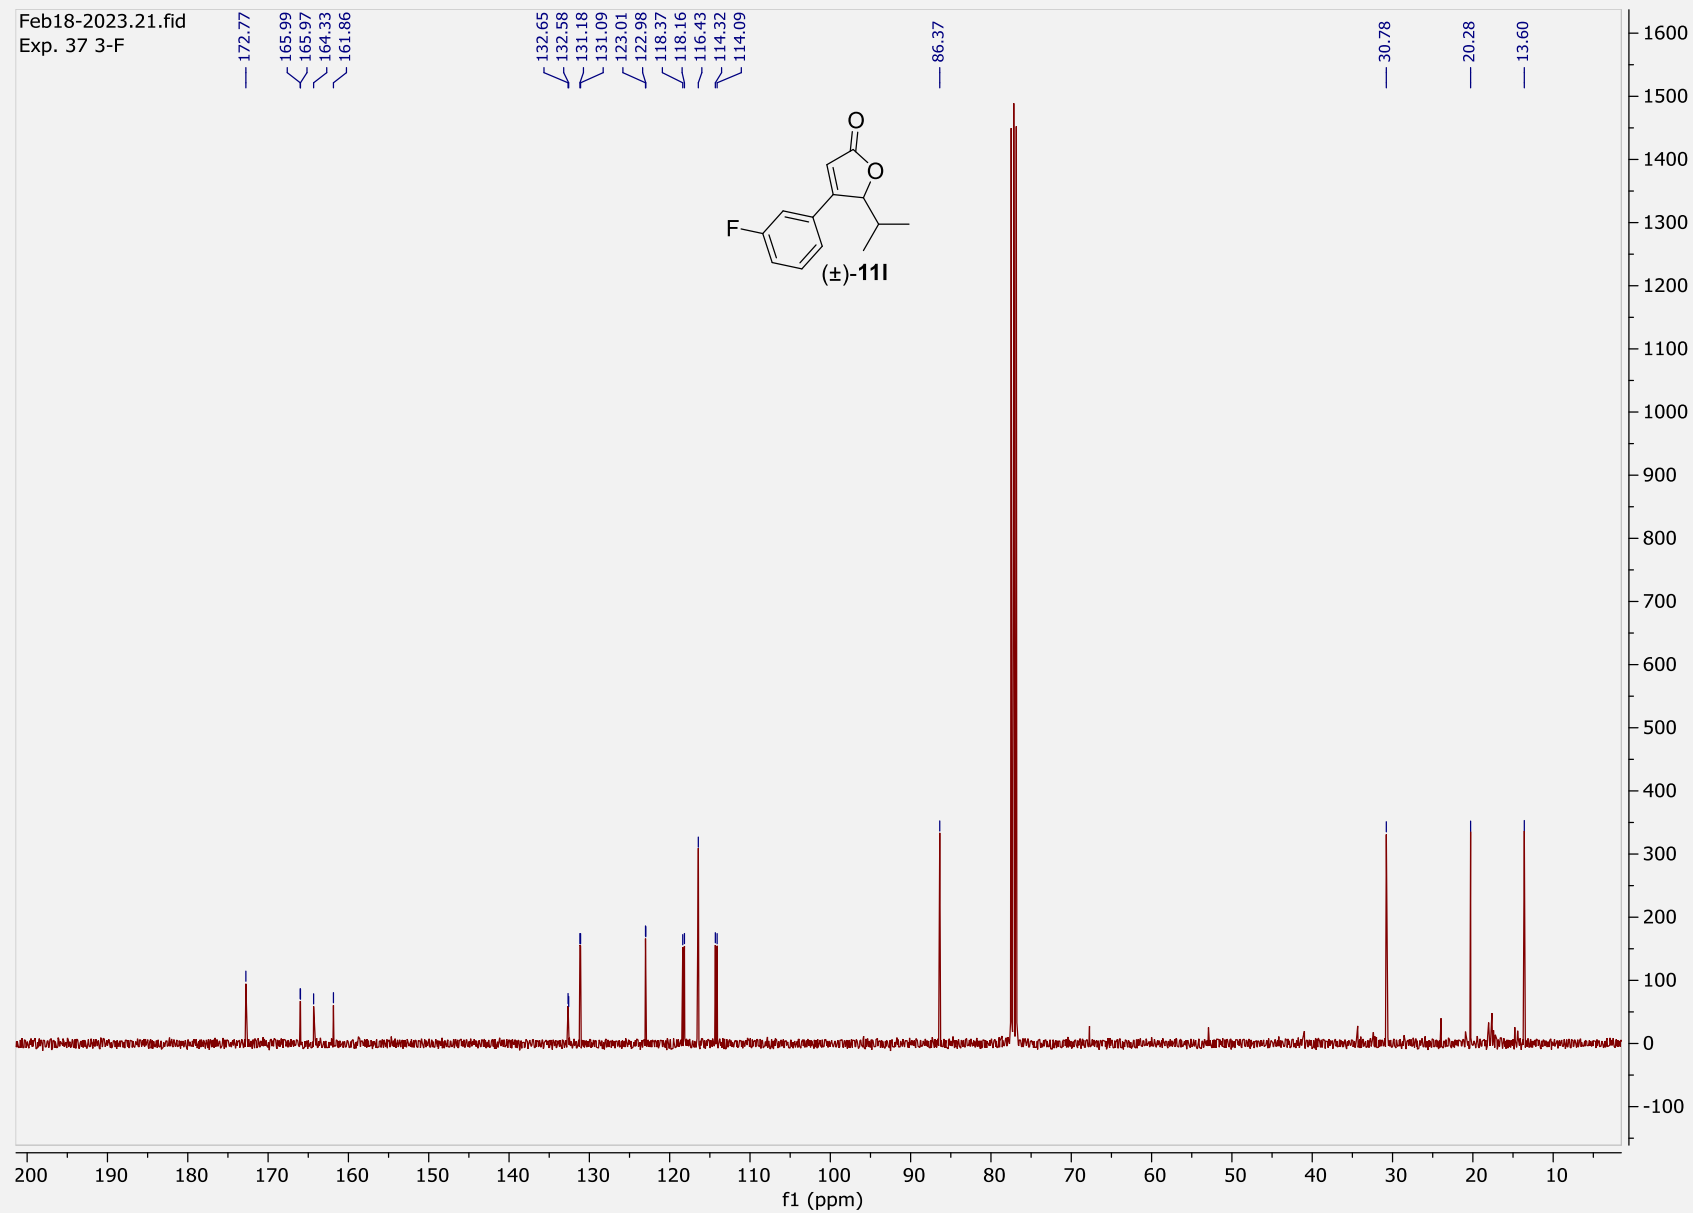

Exp. 37.10.fid  
user Oluwarotimi Ojo  
F19CPD.GLA CDCl3 /u oluajo 26

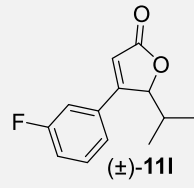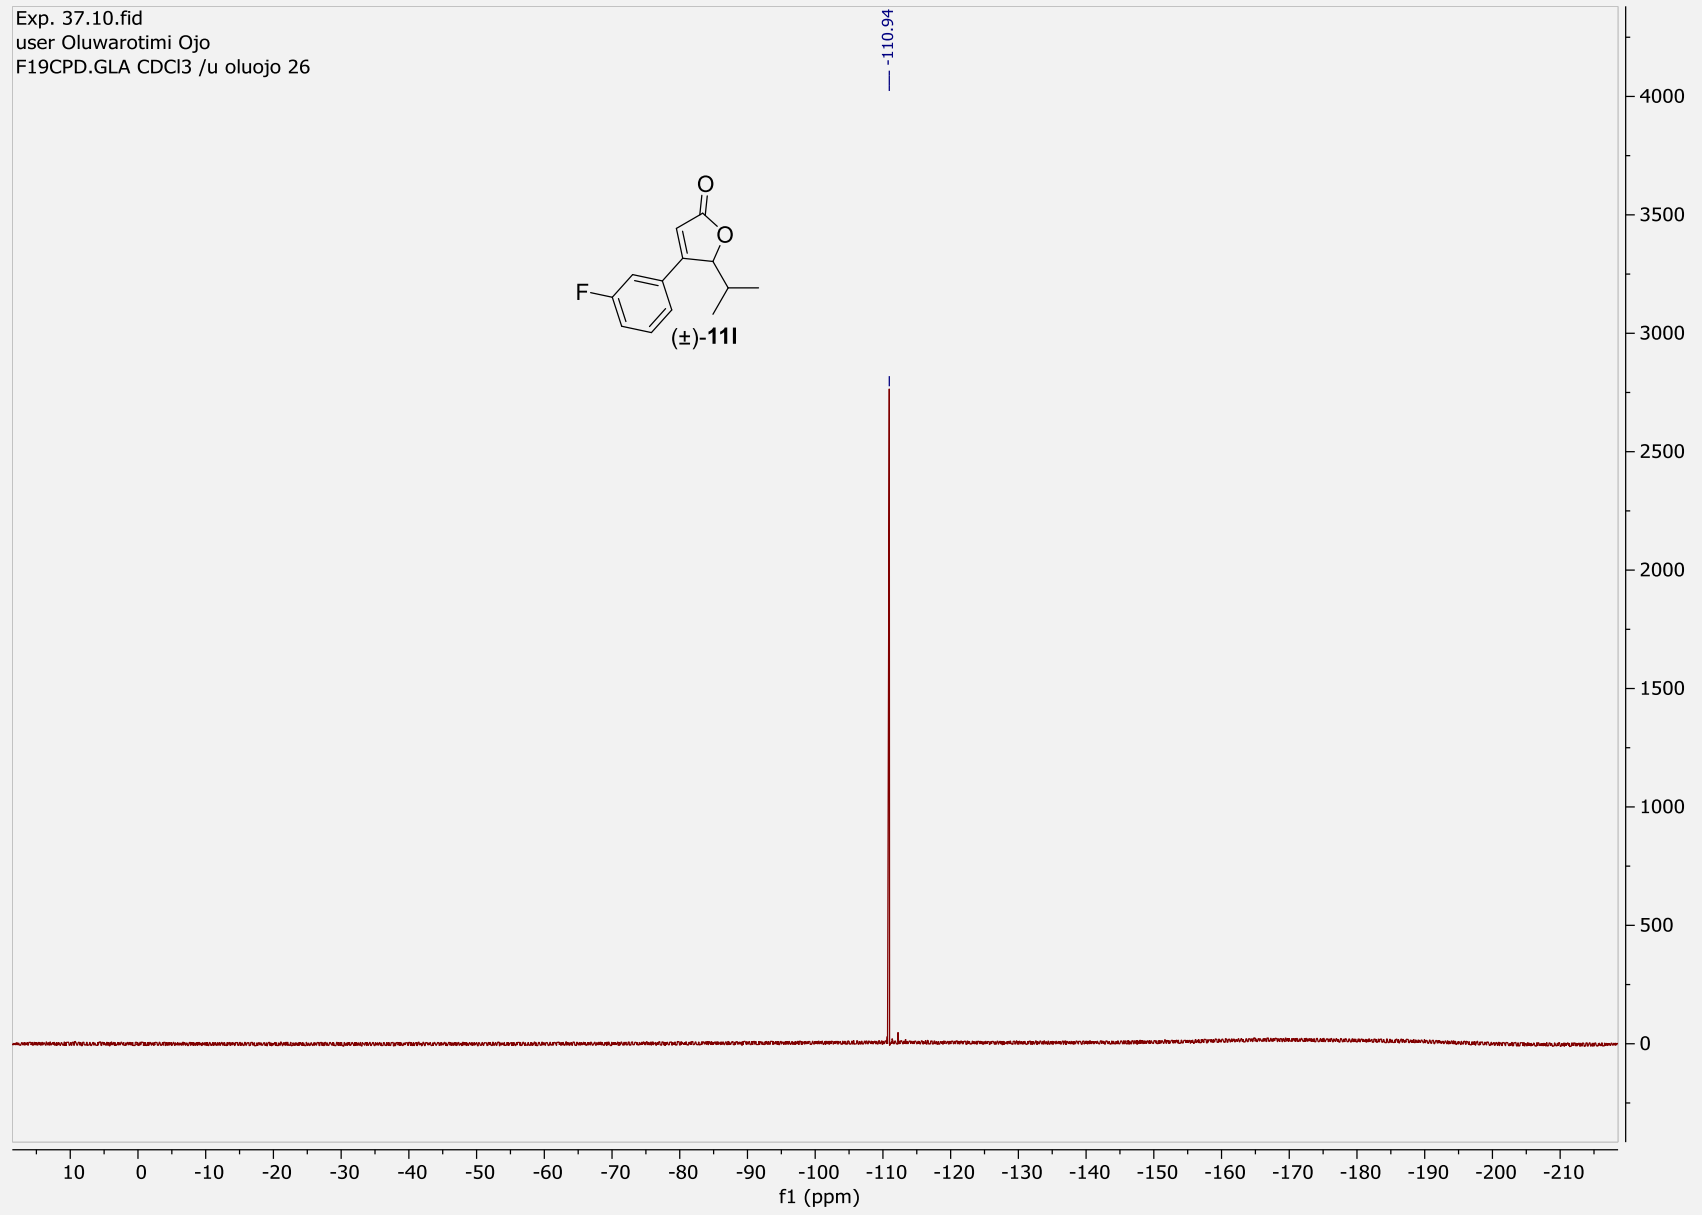

S80



Exp. 31.10.fid  
user Oluwarotimi Ojo  
PROTON.GLA CDCl3 /u oluajo 20

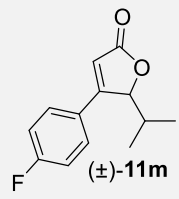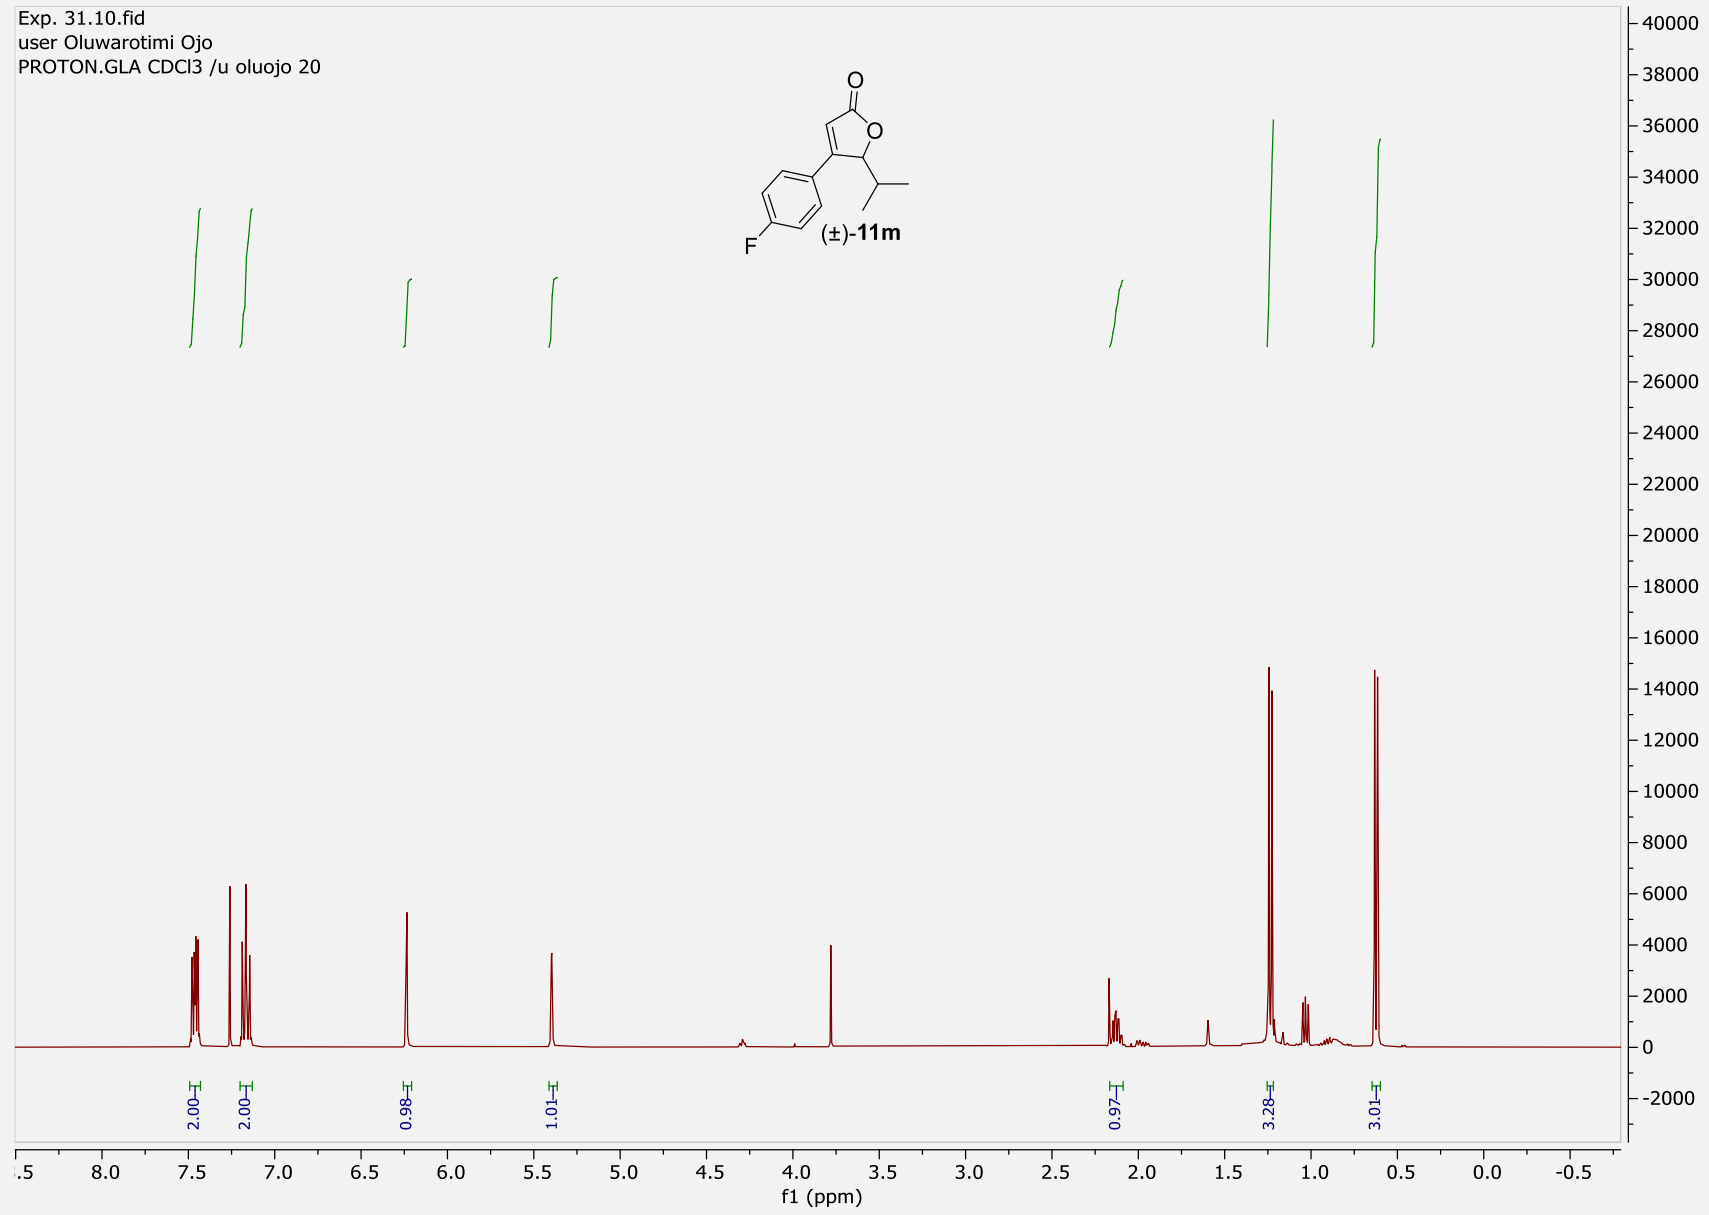

S81

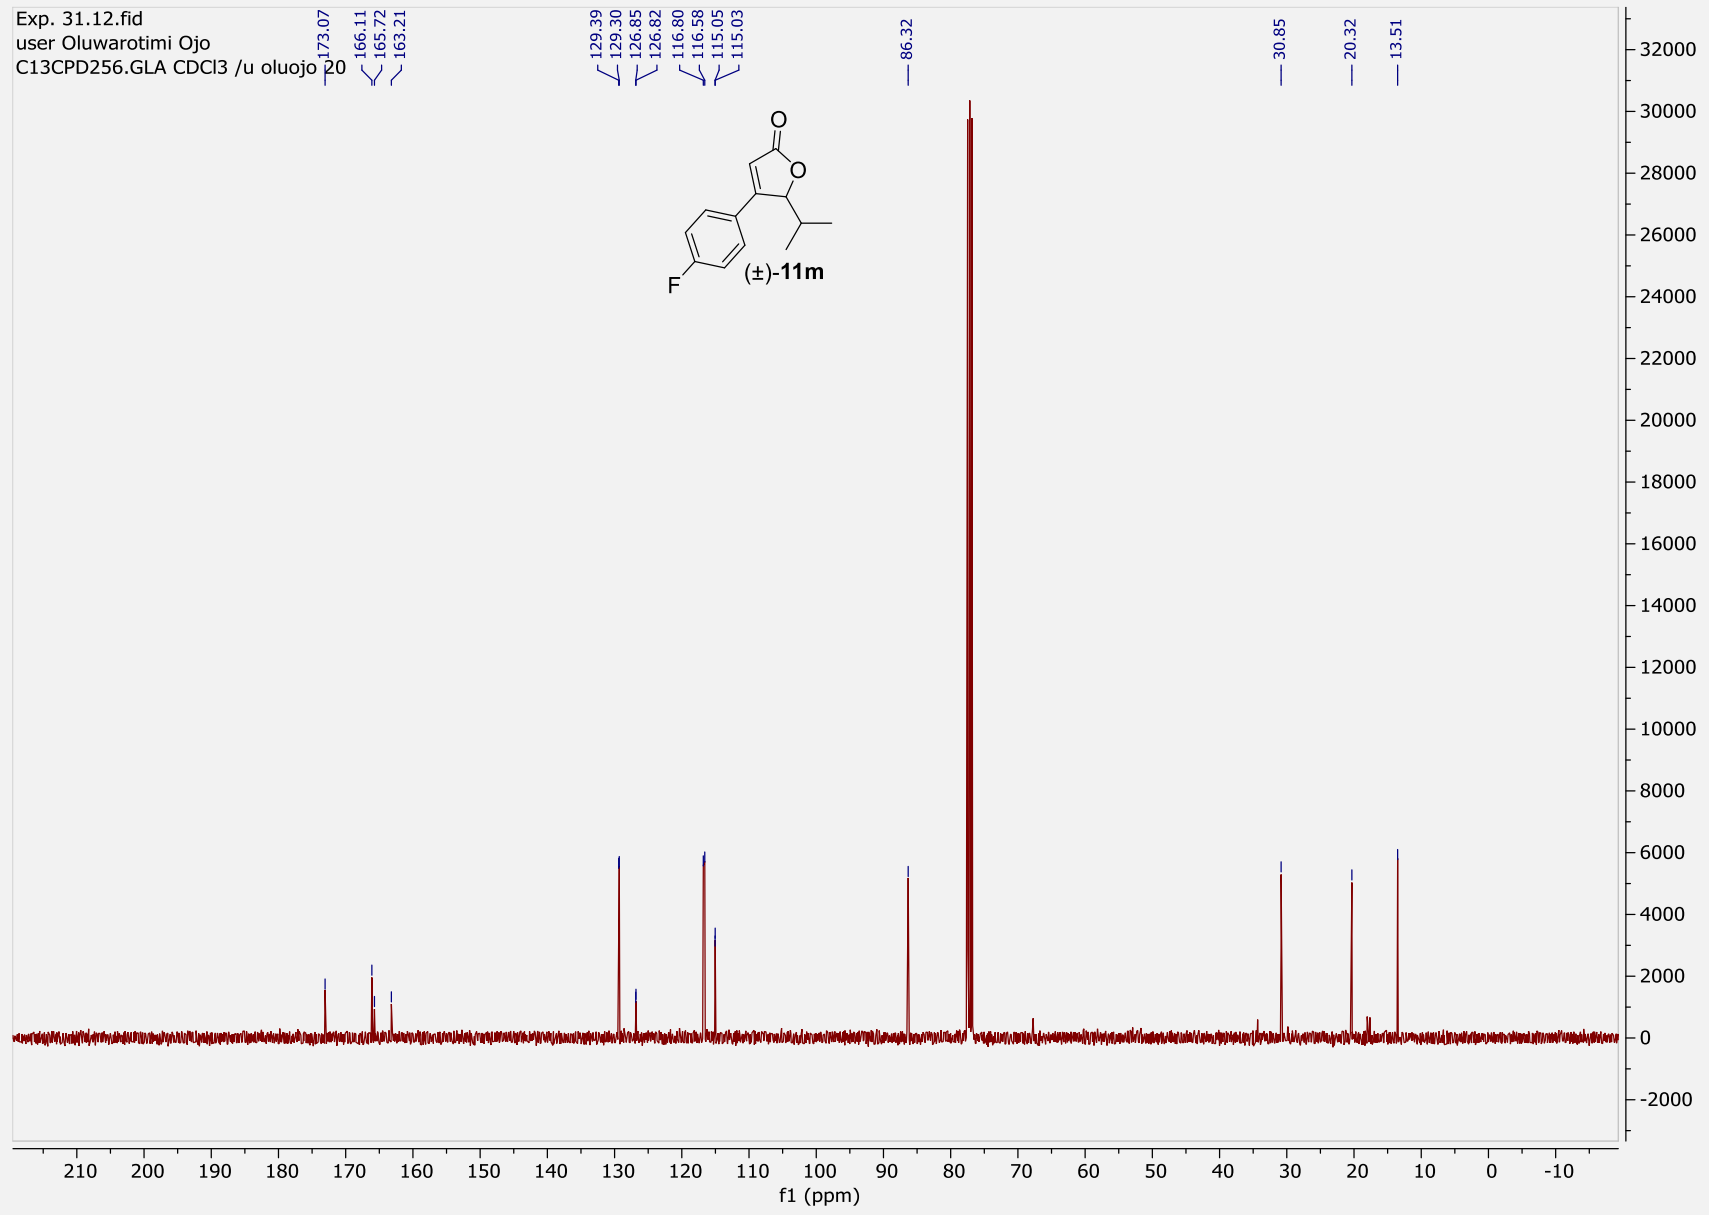

Exp. 31.11.fid  
user Oluwarotimi Ojo  
F19CPD.GLA CDCl3 /u olojo 20

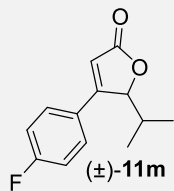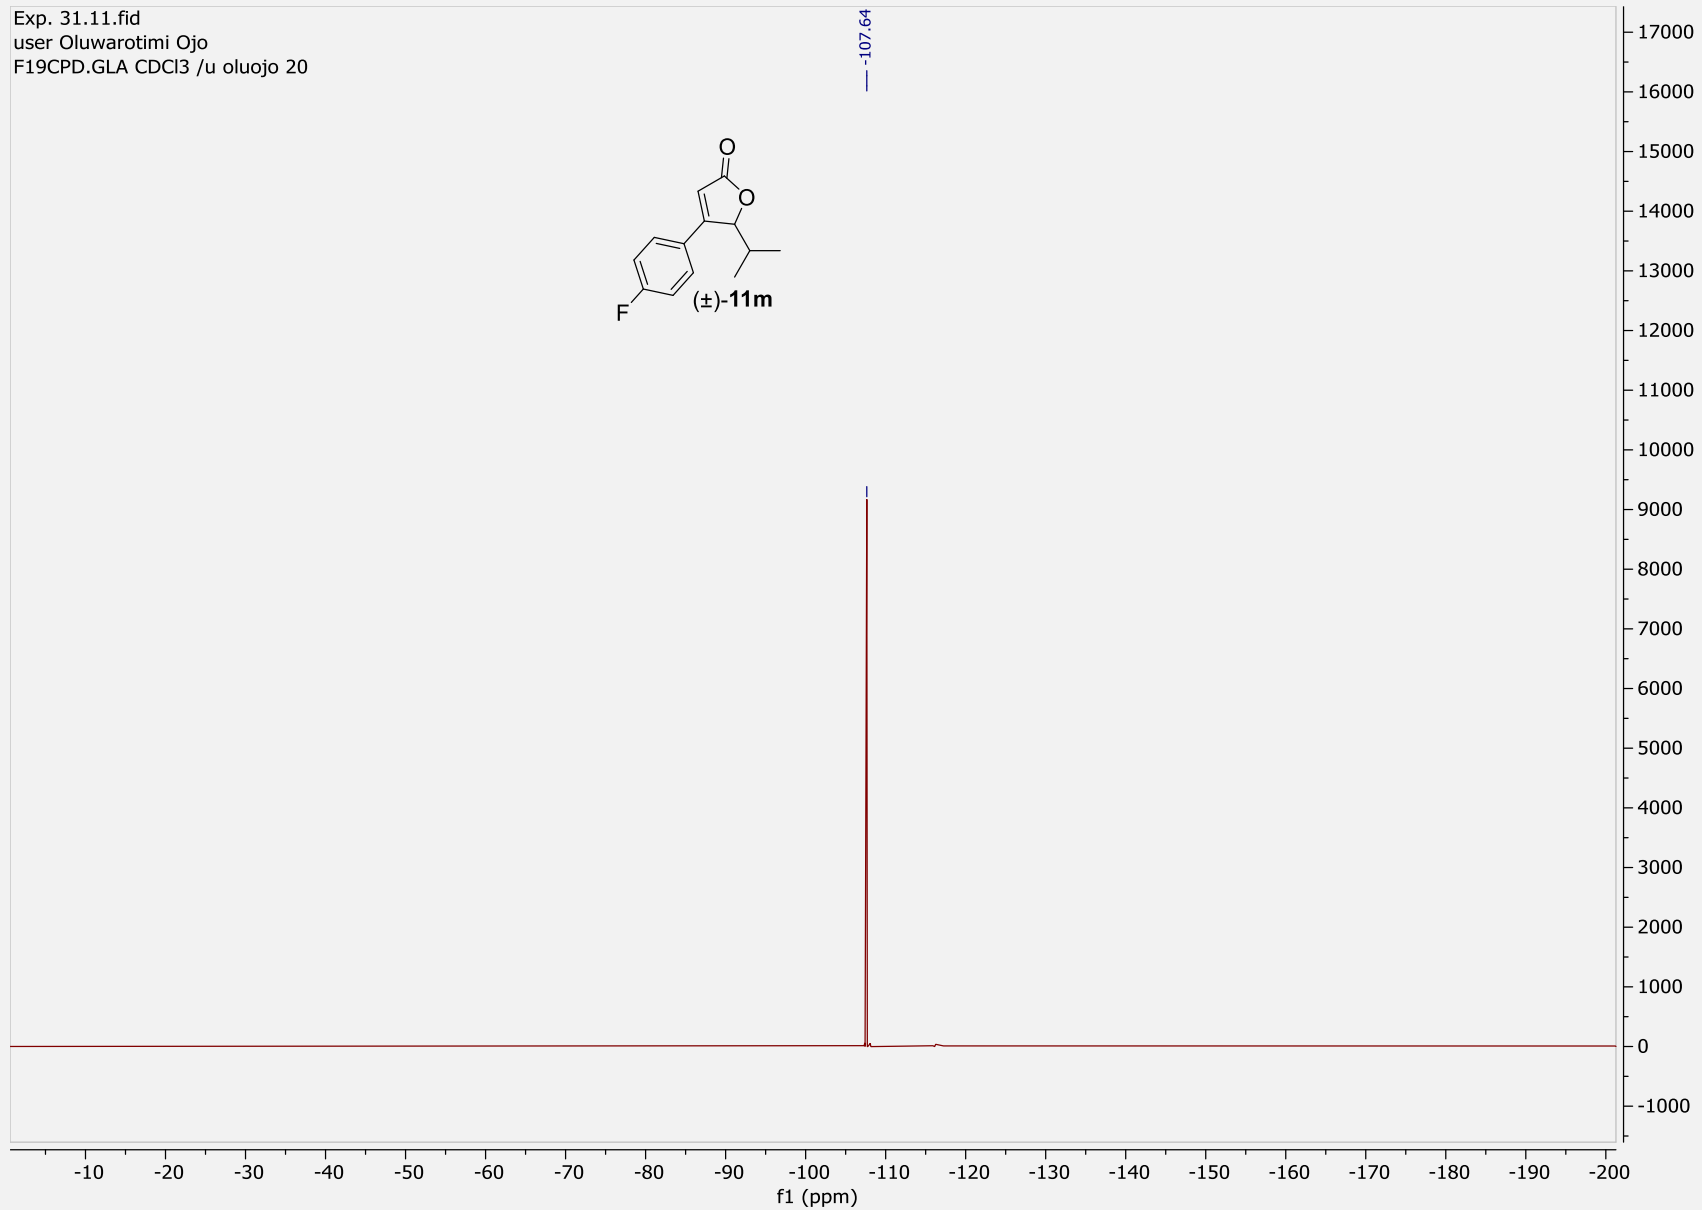

S83

Exp. 33.10.fid

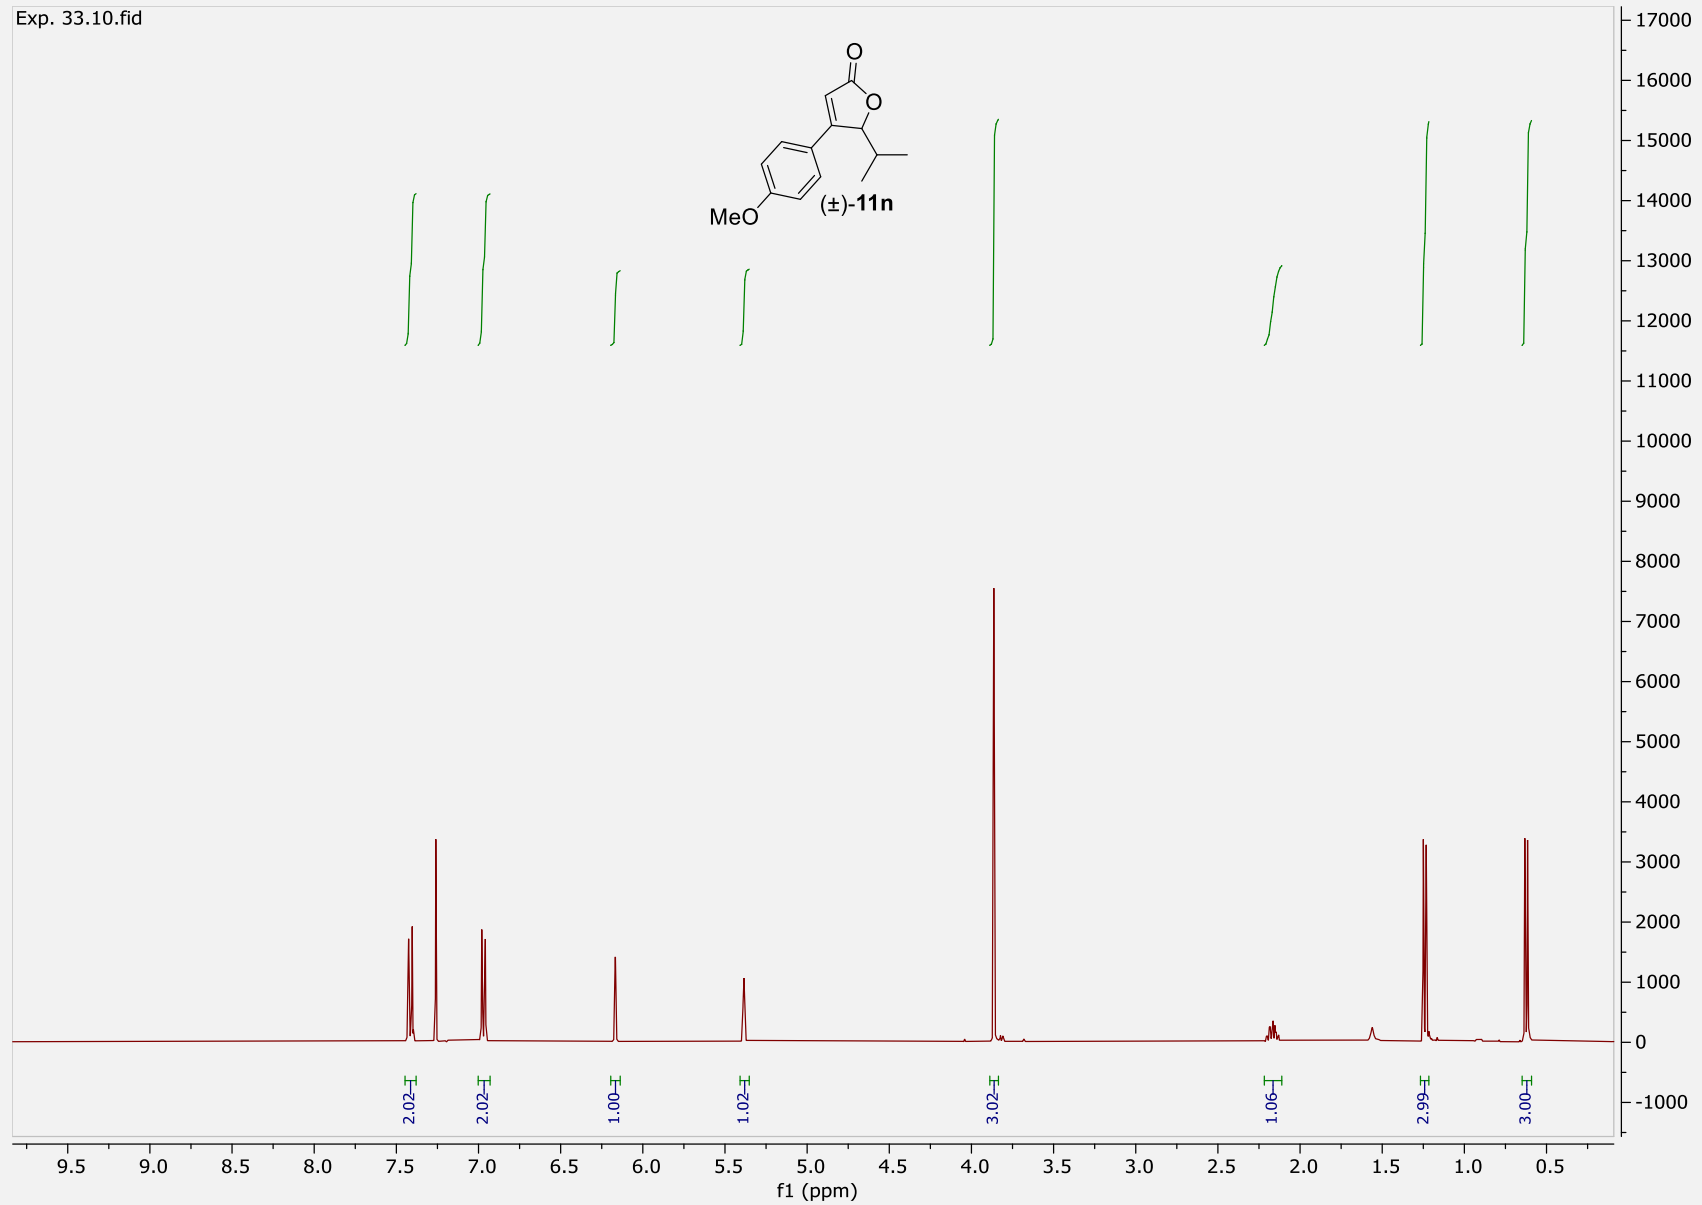

S84

Jan26-2023.31.fid  
Exp. 33

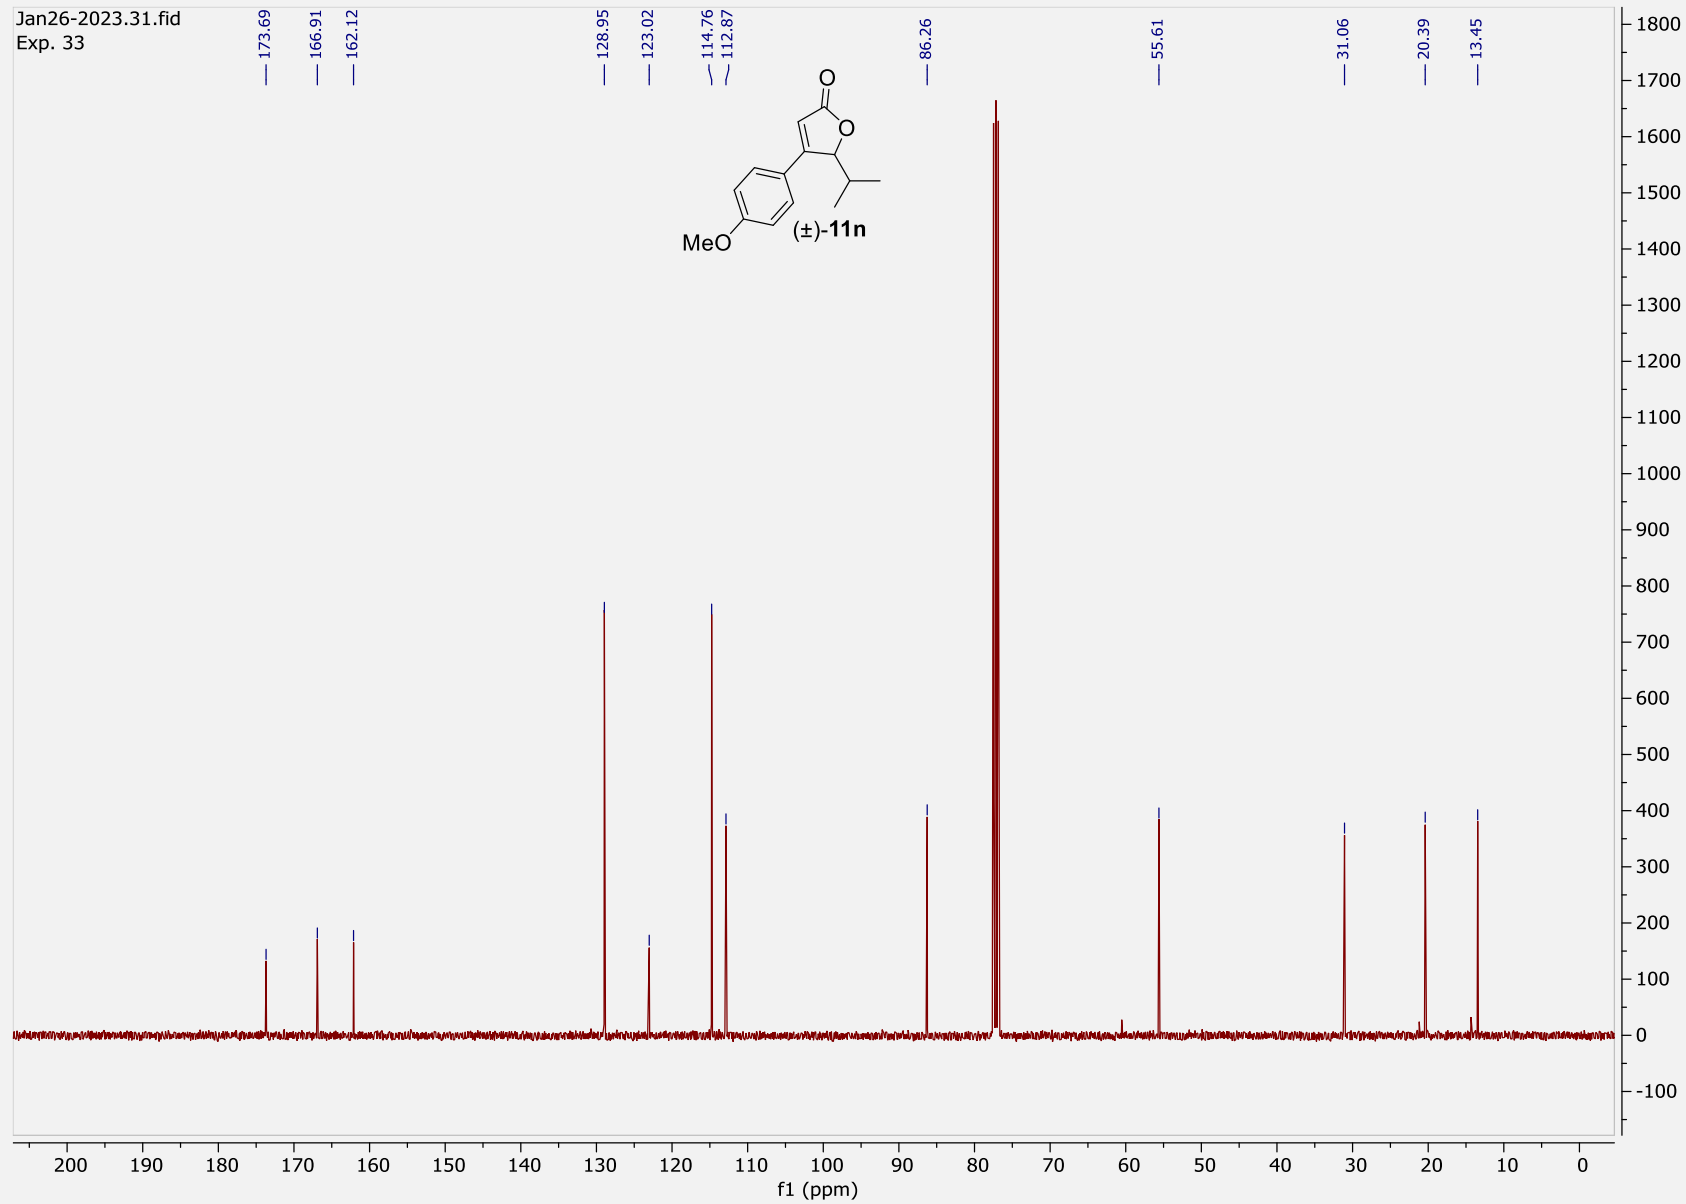

S85

Exp. 66.10.fid

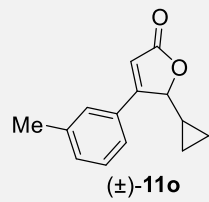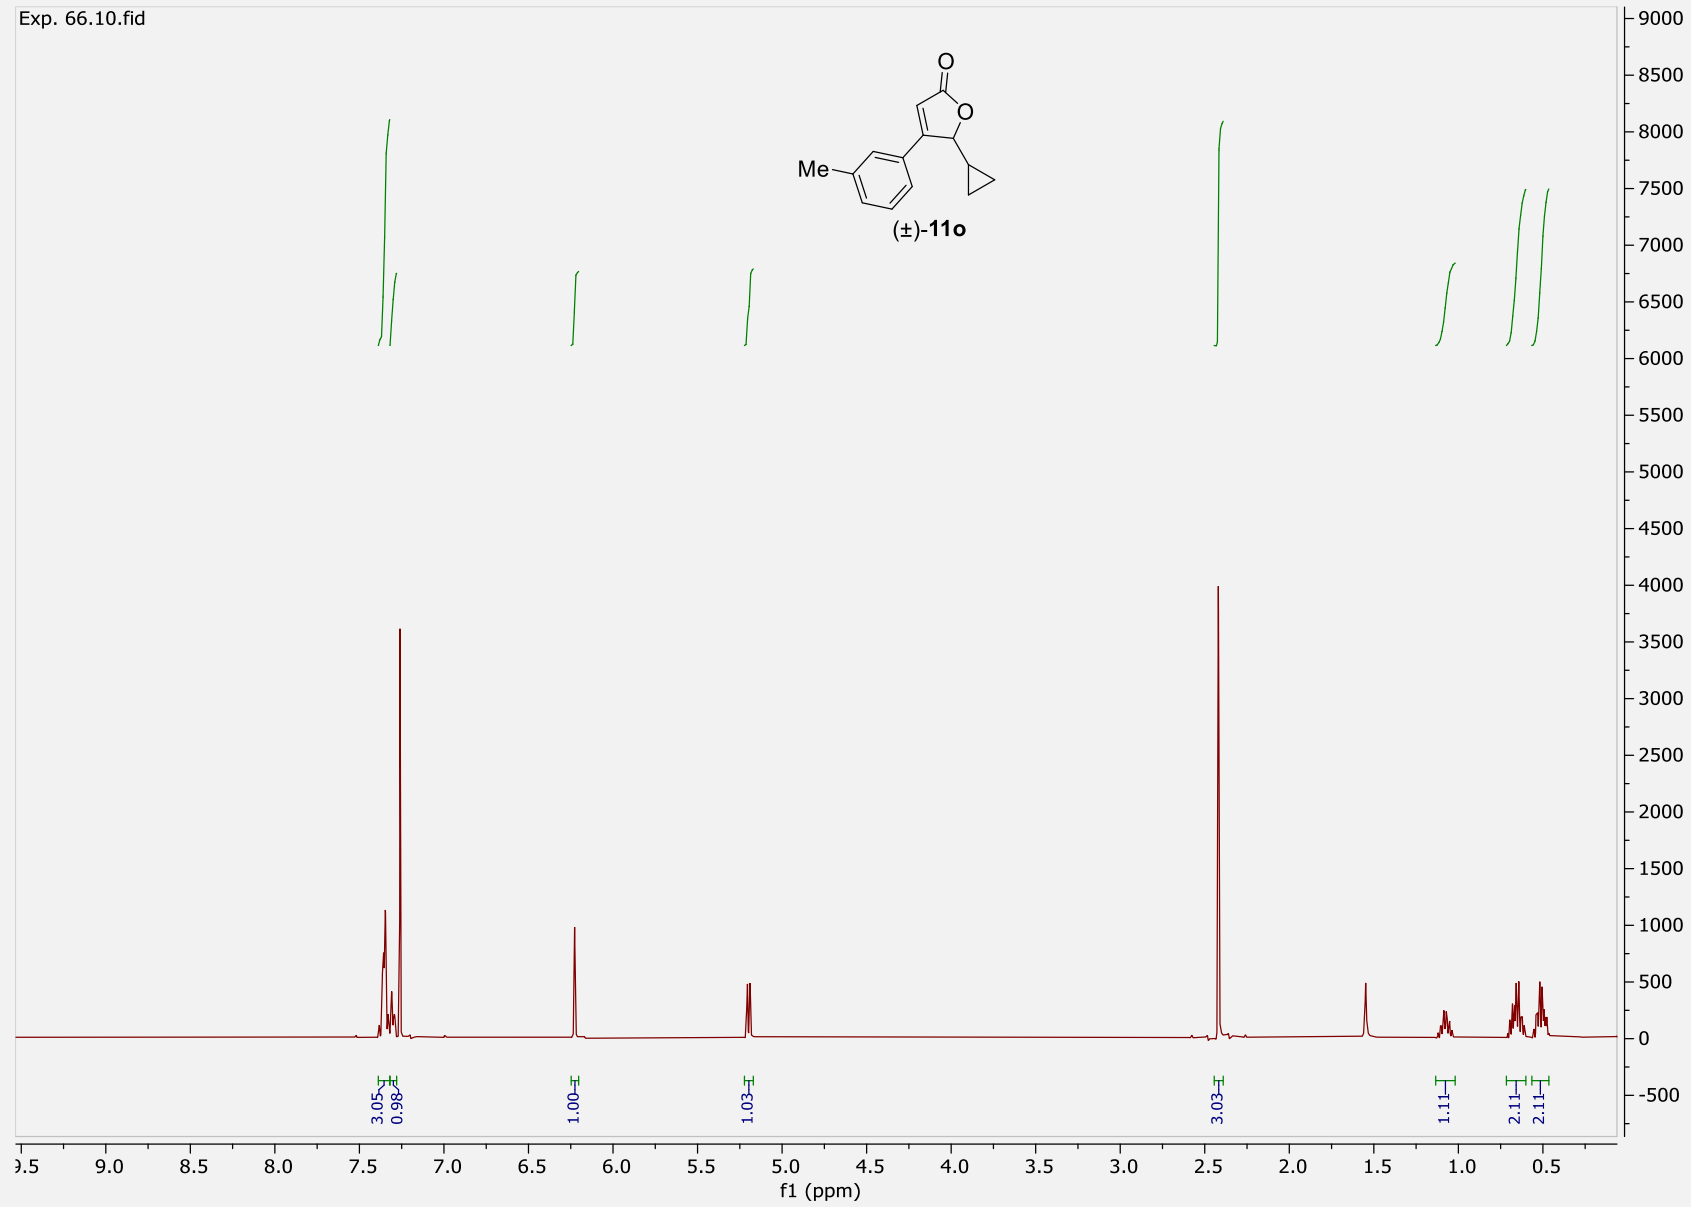

Exp. 66.11.fid  
user Oluwarotimi Ojo  
C13CPD256.GLA CDCl3 / μ olojo 24

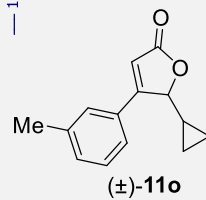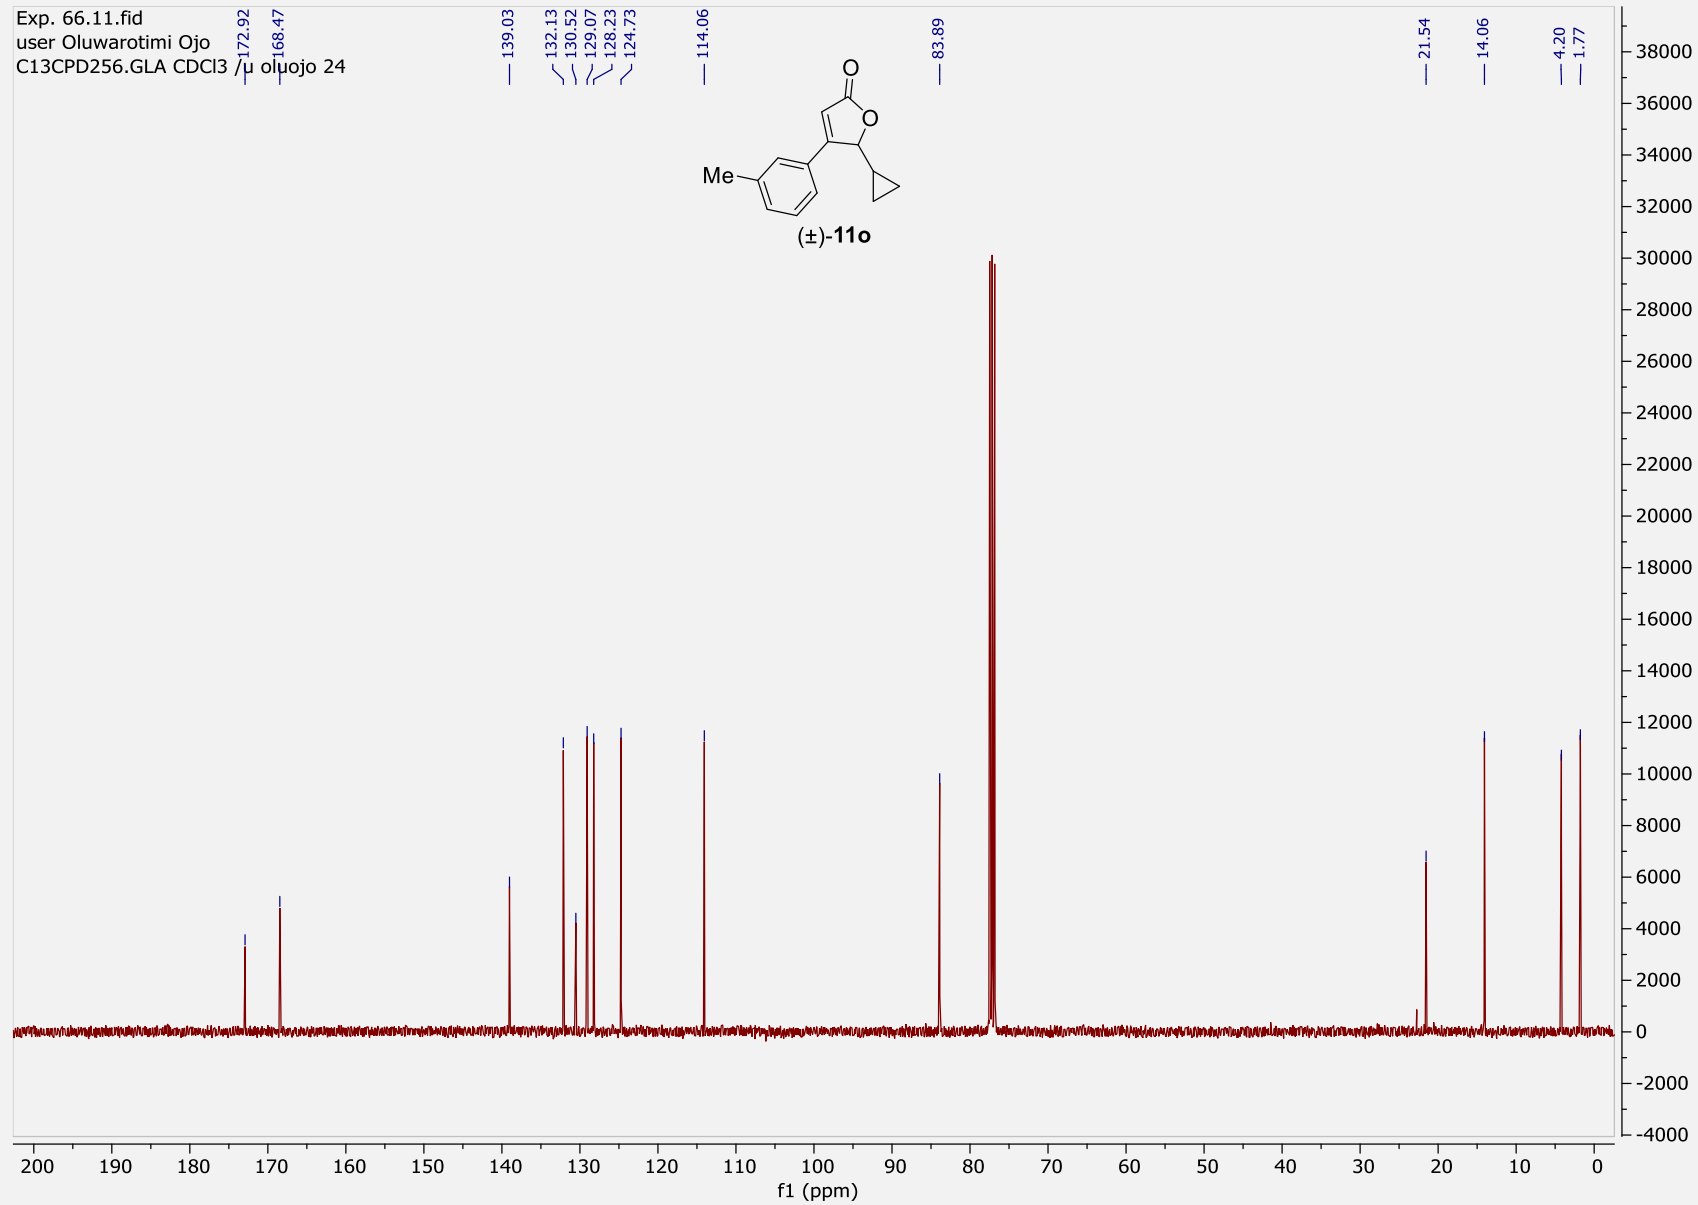

Exp. 61.10.fid  
user Oluwarotimi Ojo  
PROTON.GLA CDCl3 /u oluajo 24

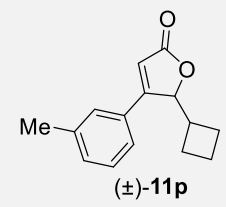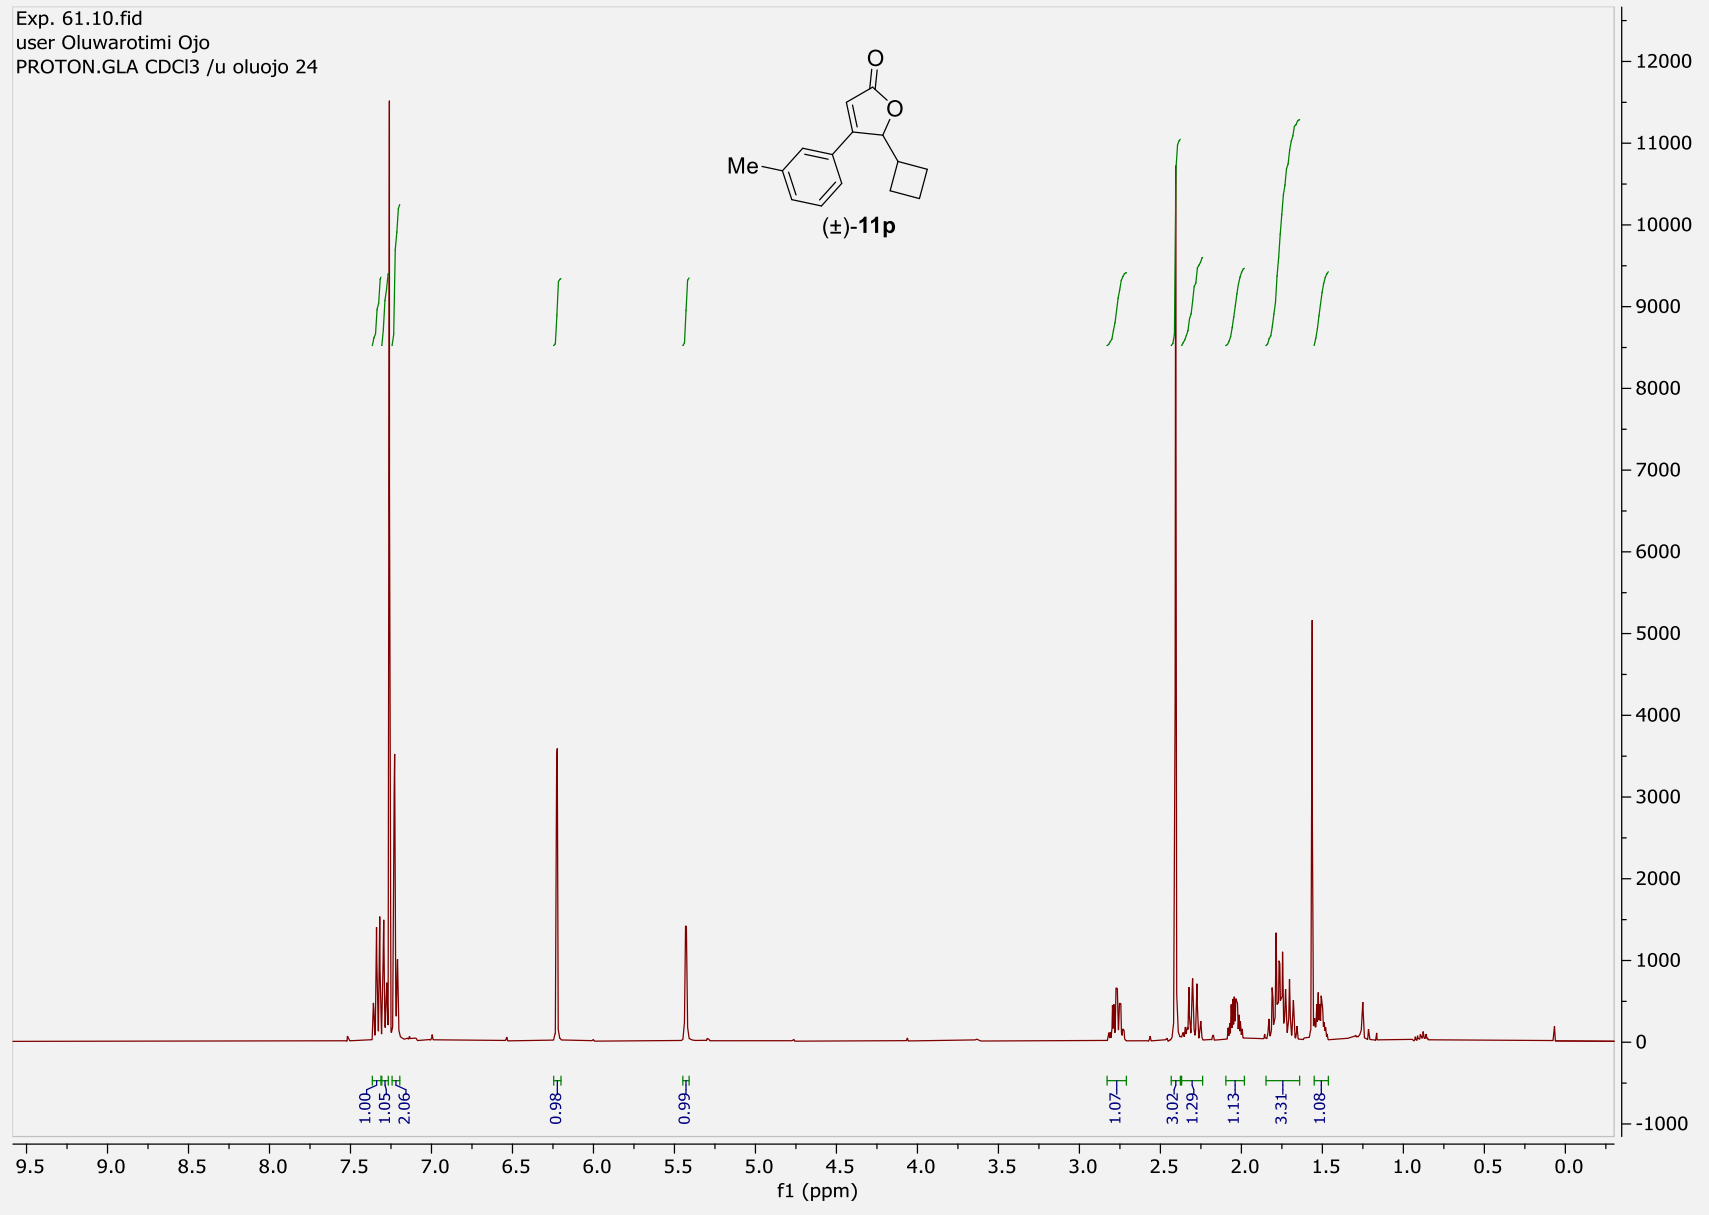



Exp. 61.20.fid

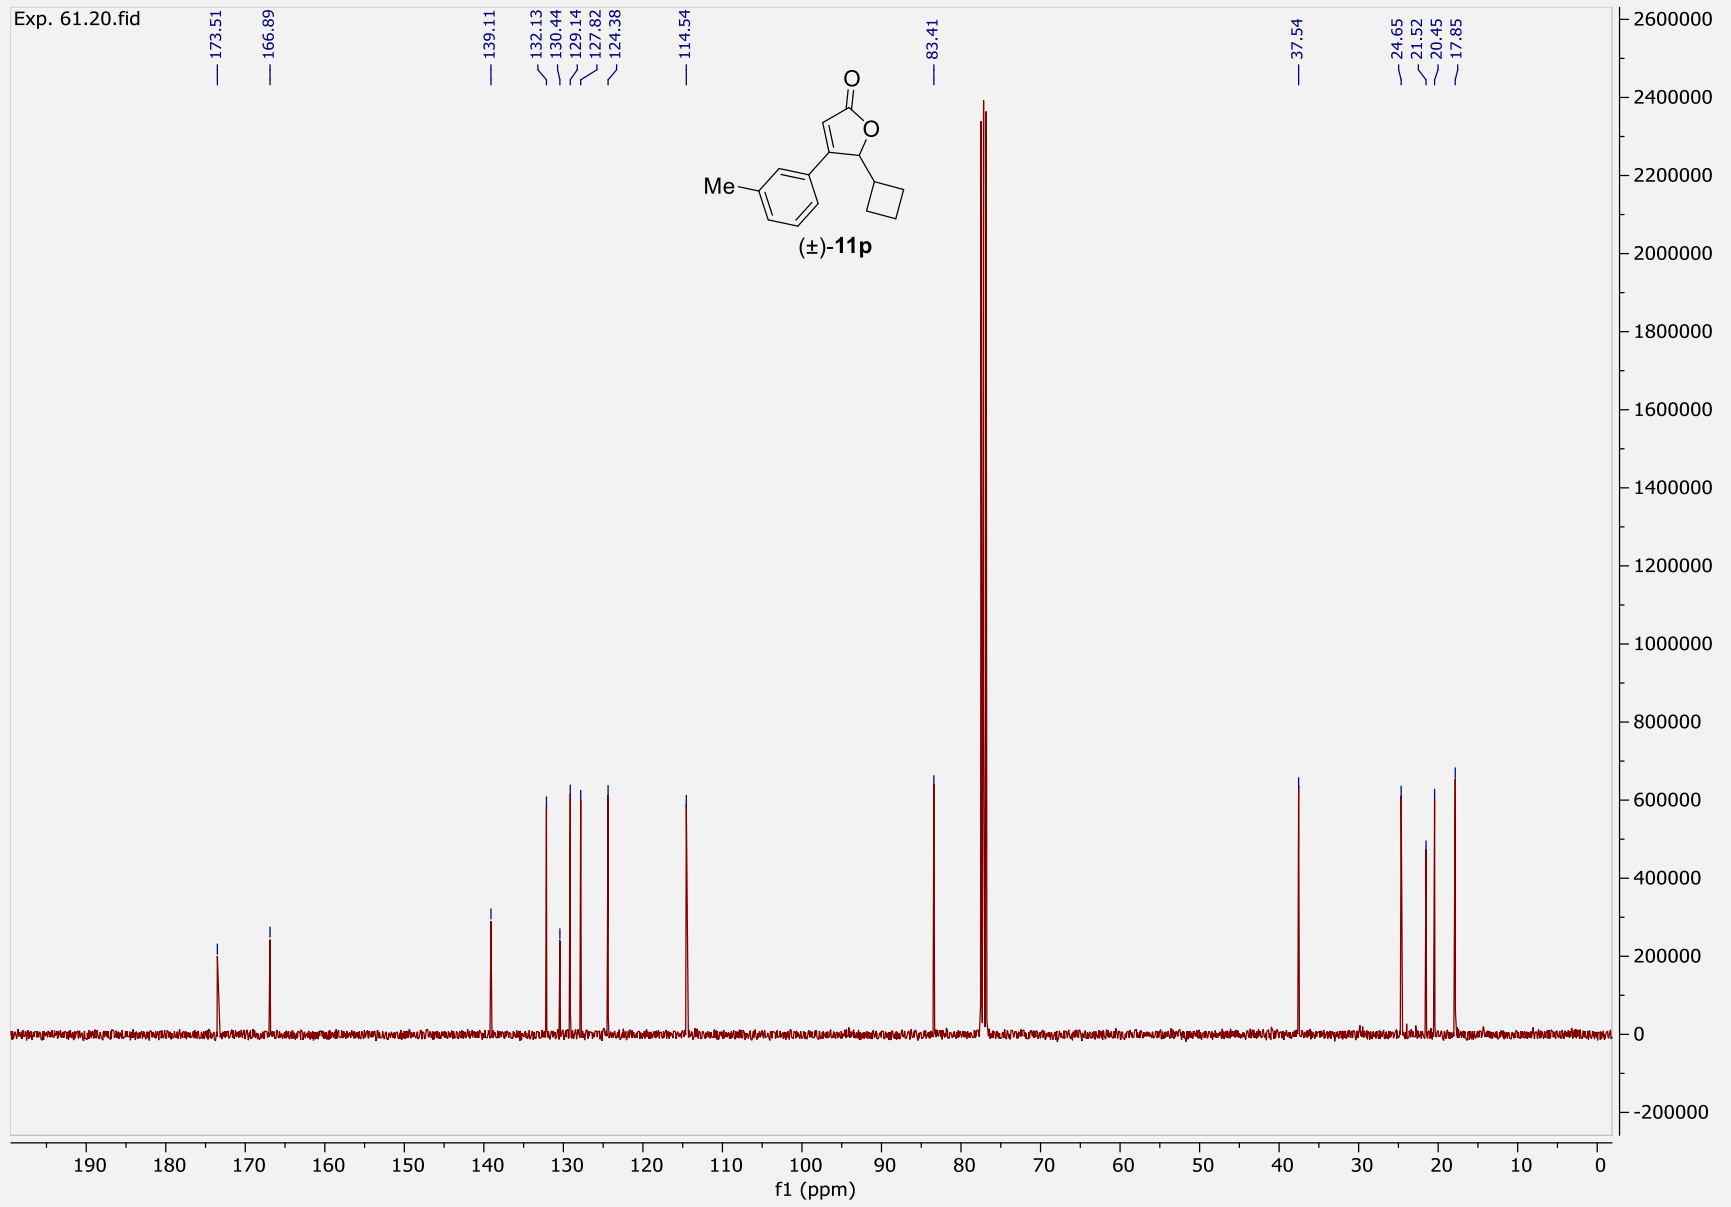

S89

Exp. 62.10.fid

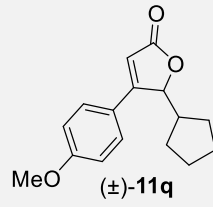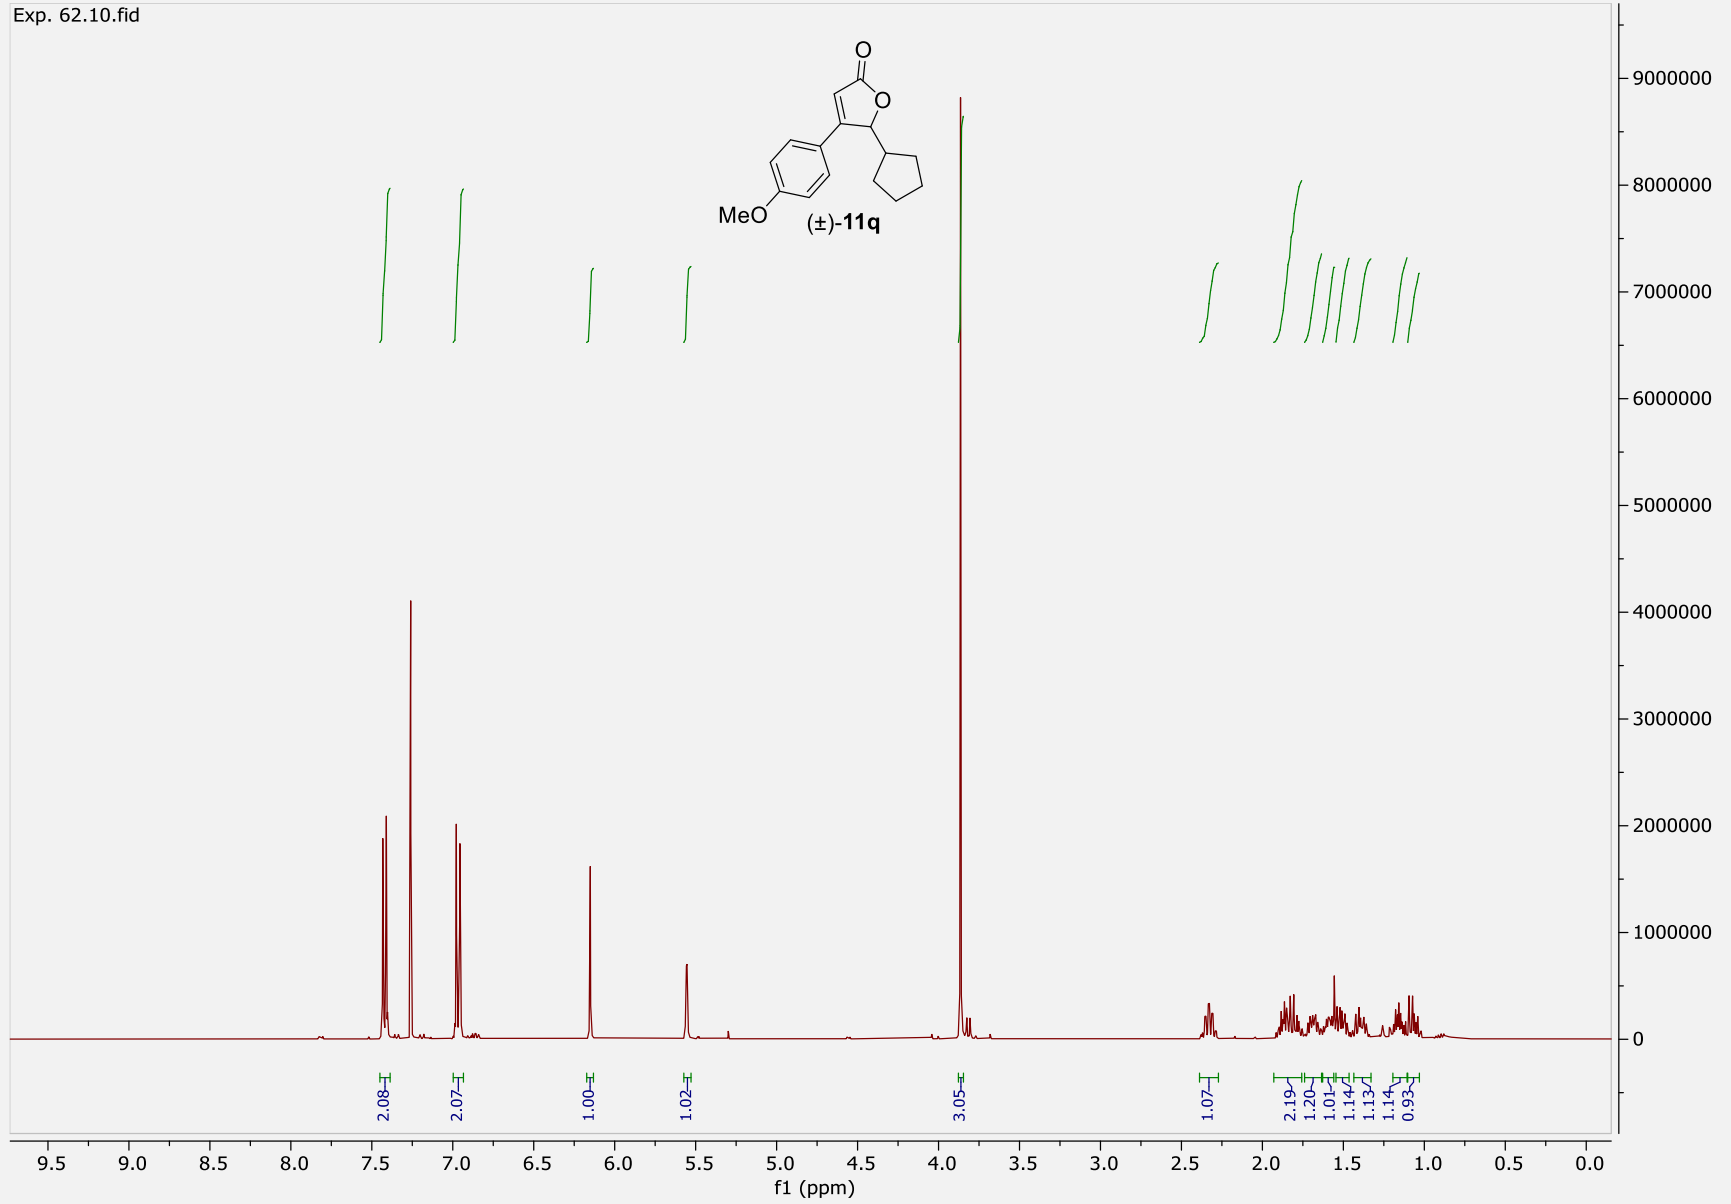

S90

Exp. 62.20.fid

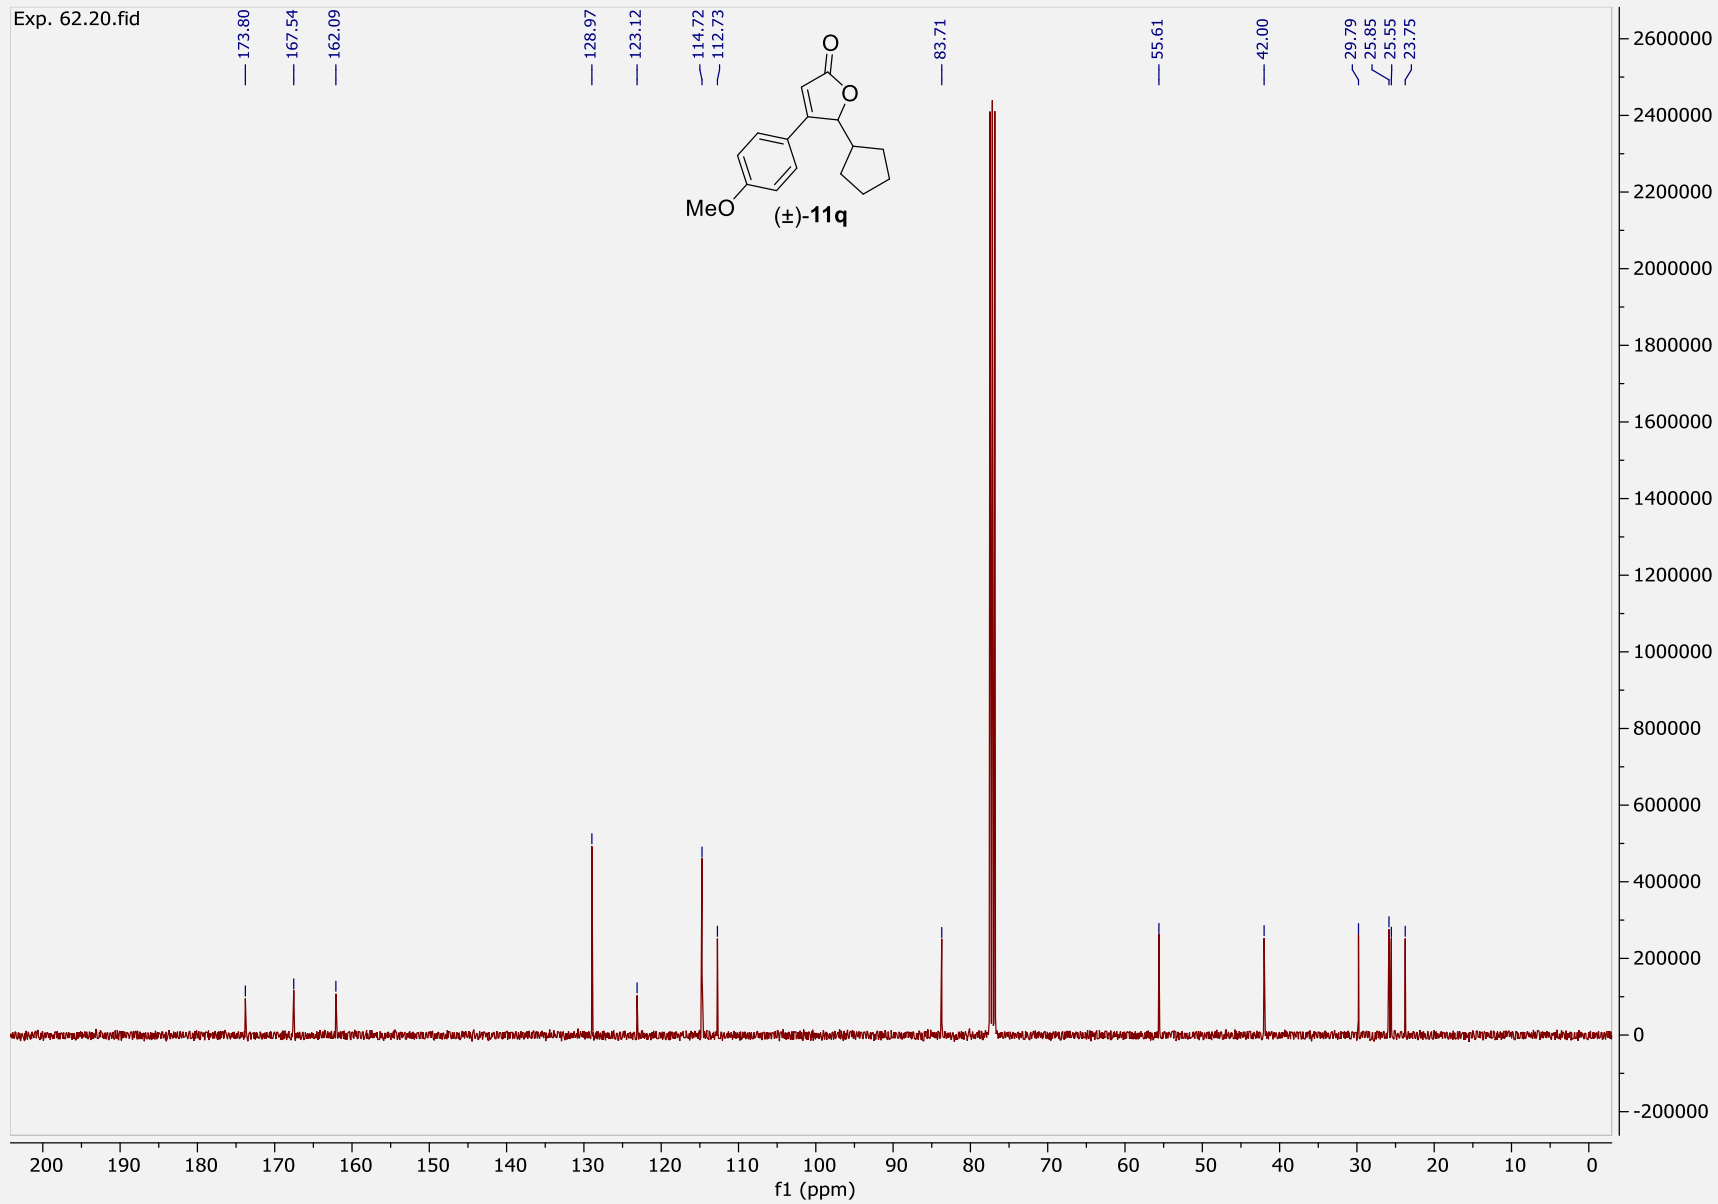

S91

Exp. 55.10.fid  
user Oluwarotimi Ojo  
PROTON.GLA CDCl3 /u oluojo 21

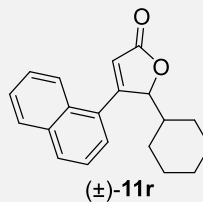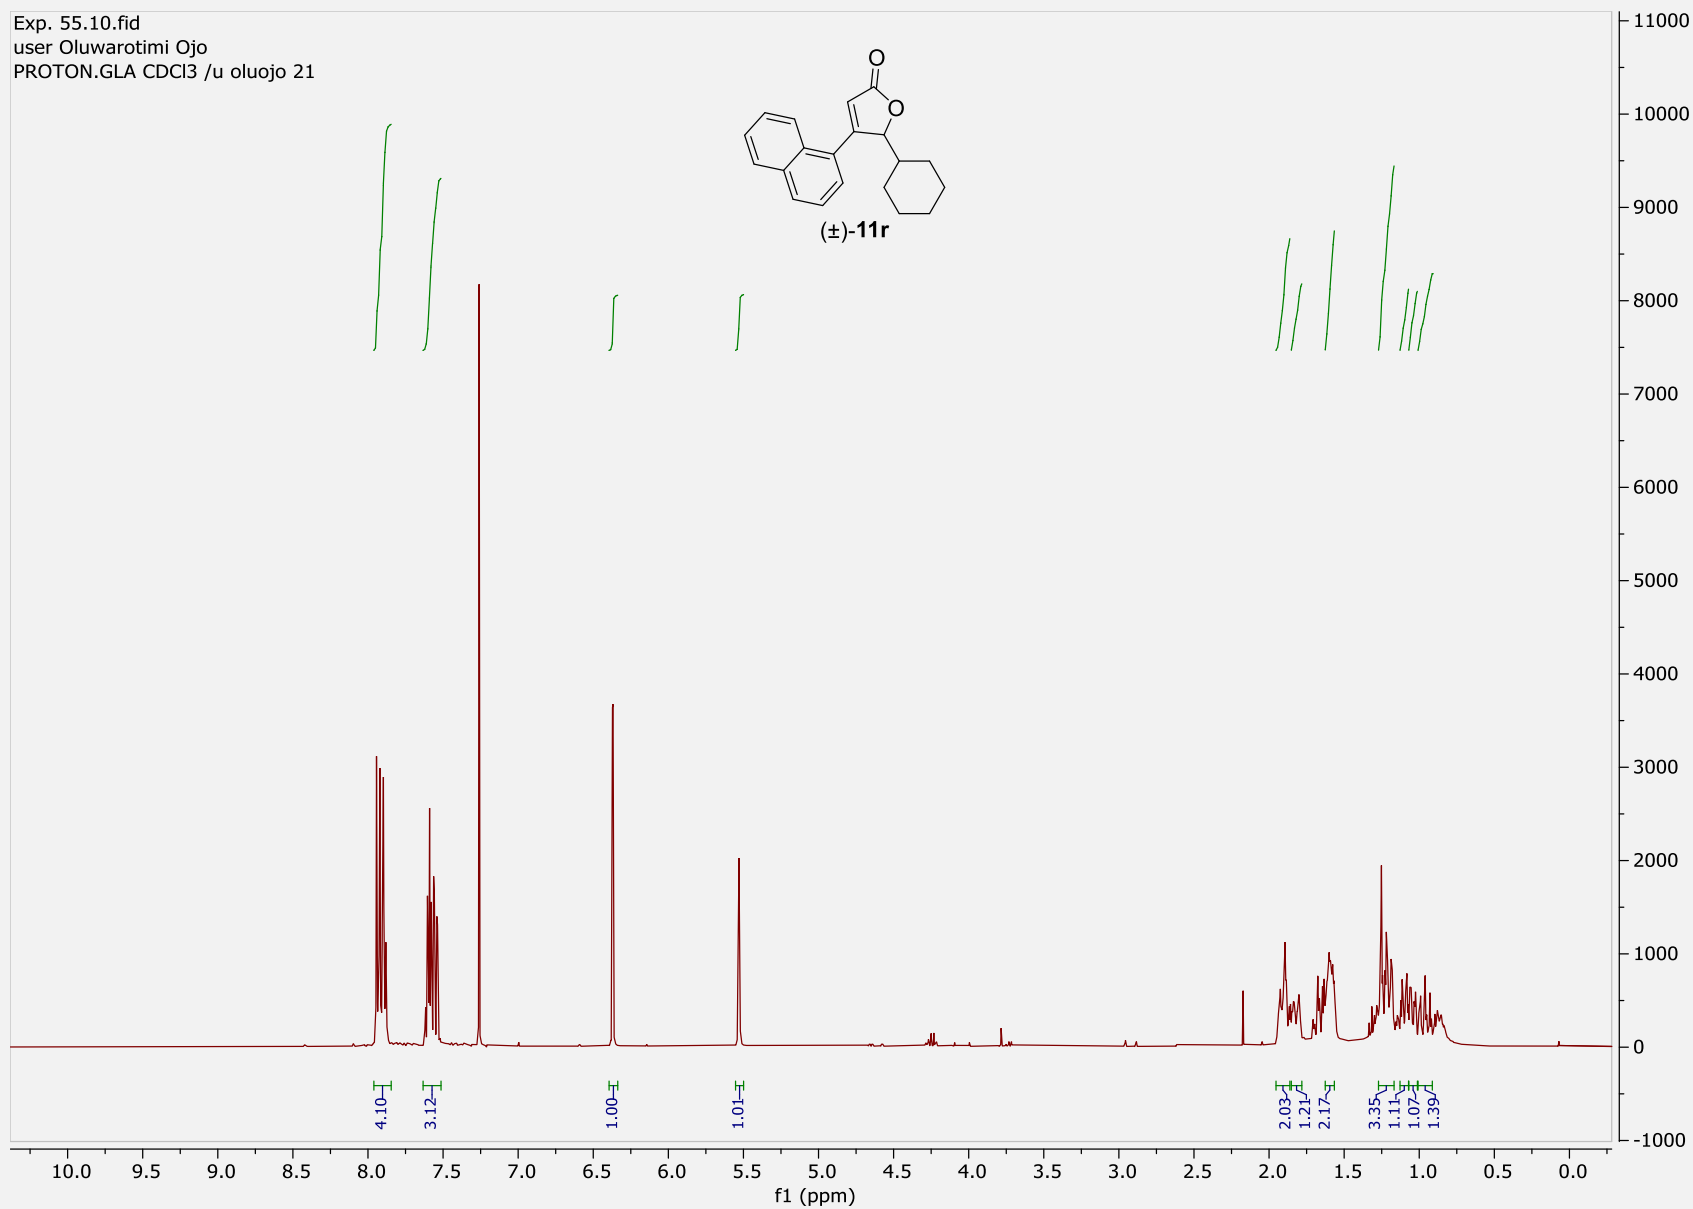

Exp. 55.11.fid  
user Oluwarotimi Ojo  
C13CPD256.GLA CDCl3 /u oluojo |21

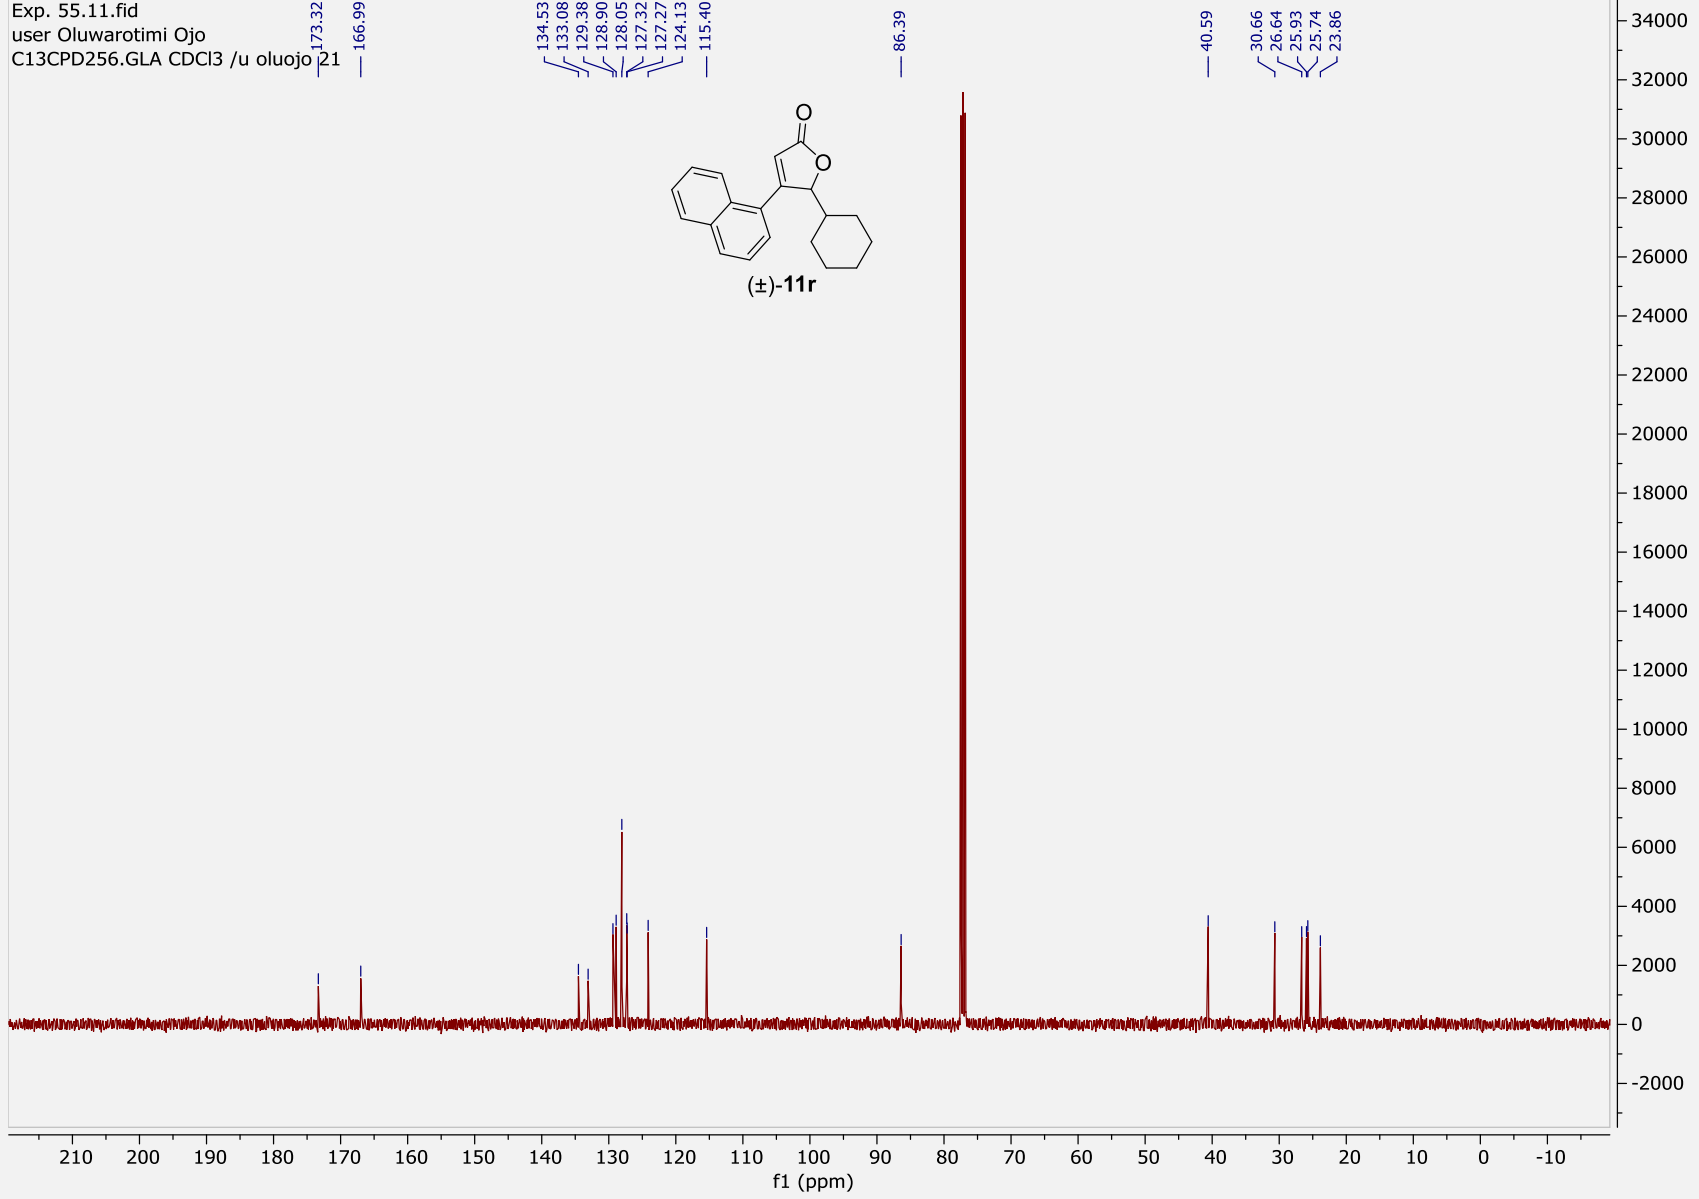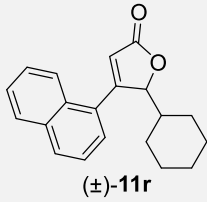

Exp. 59.10.fid

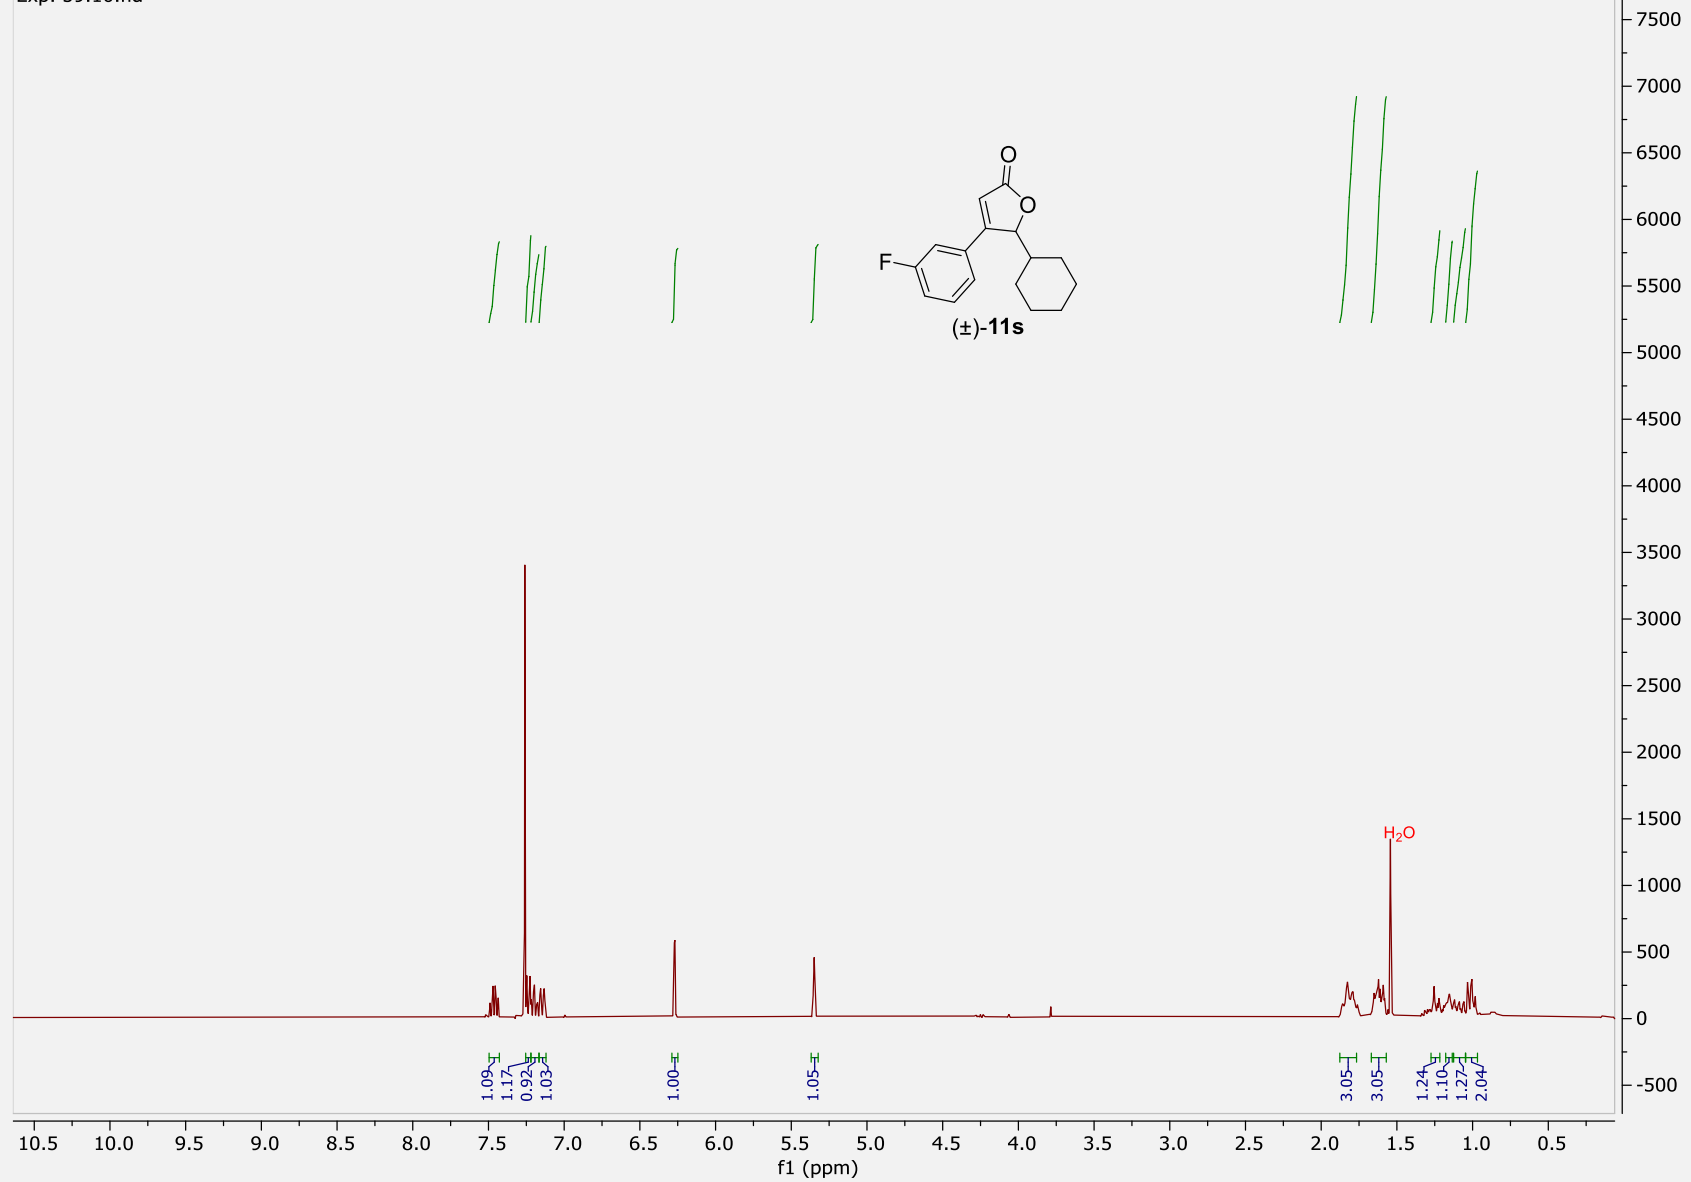

S94

Exp. 59.12.fid  
user Oluwarotimi Ojo  
C13CPD256.GLA CDCl3 (u oluajo 22

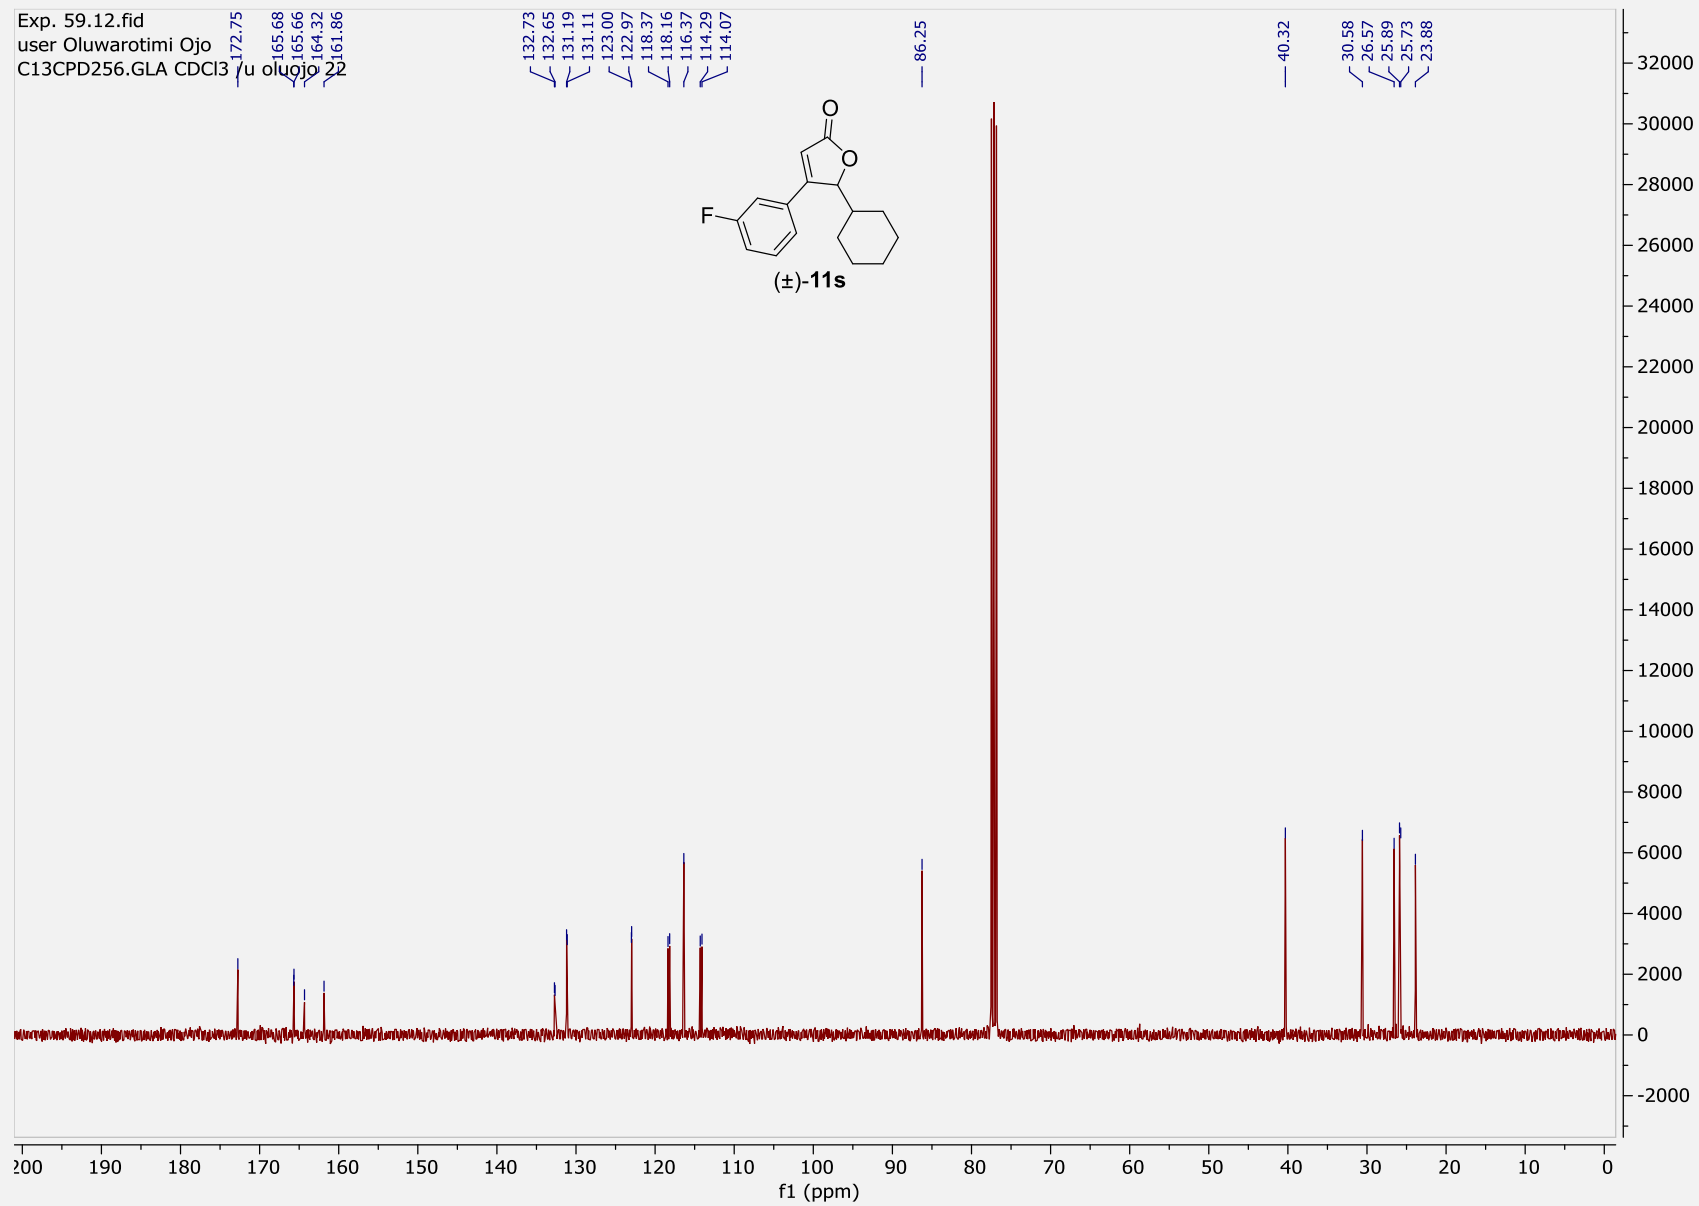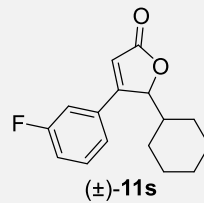

S95

Exp. 59.11.fid  
user Oluwarotimi Ojo  
F19CPD.GLA CDCl3 /u oluajo 22

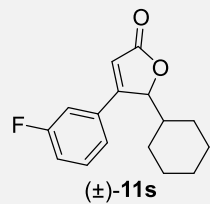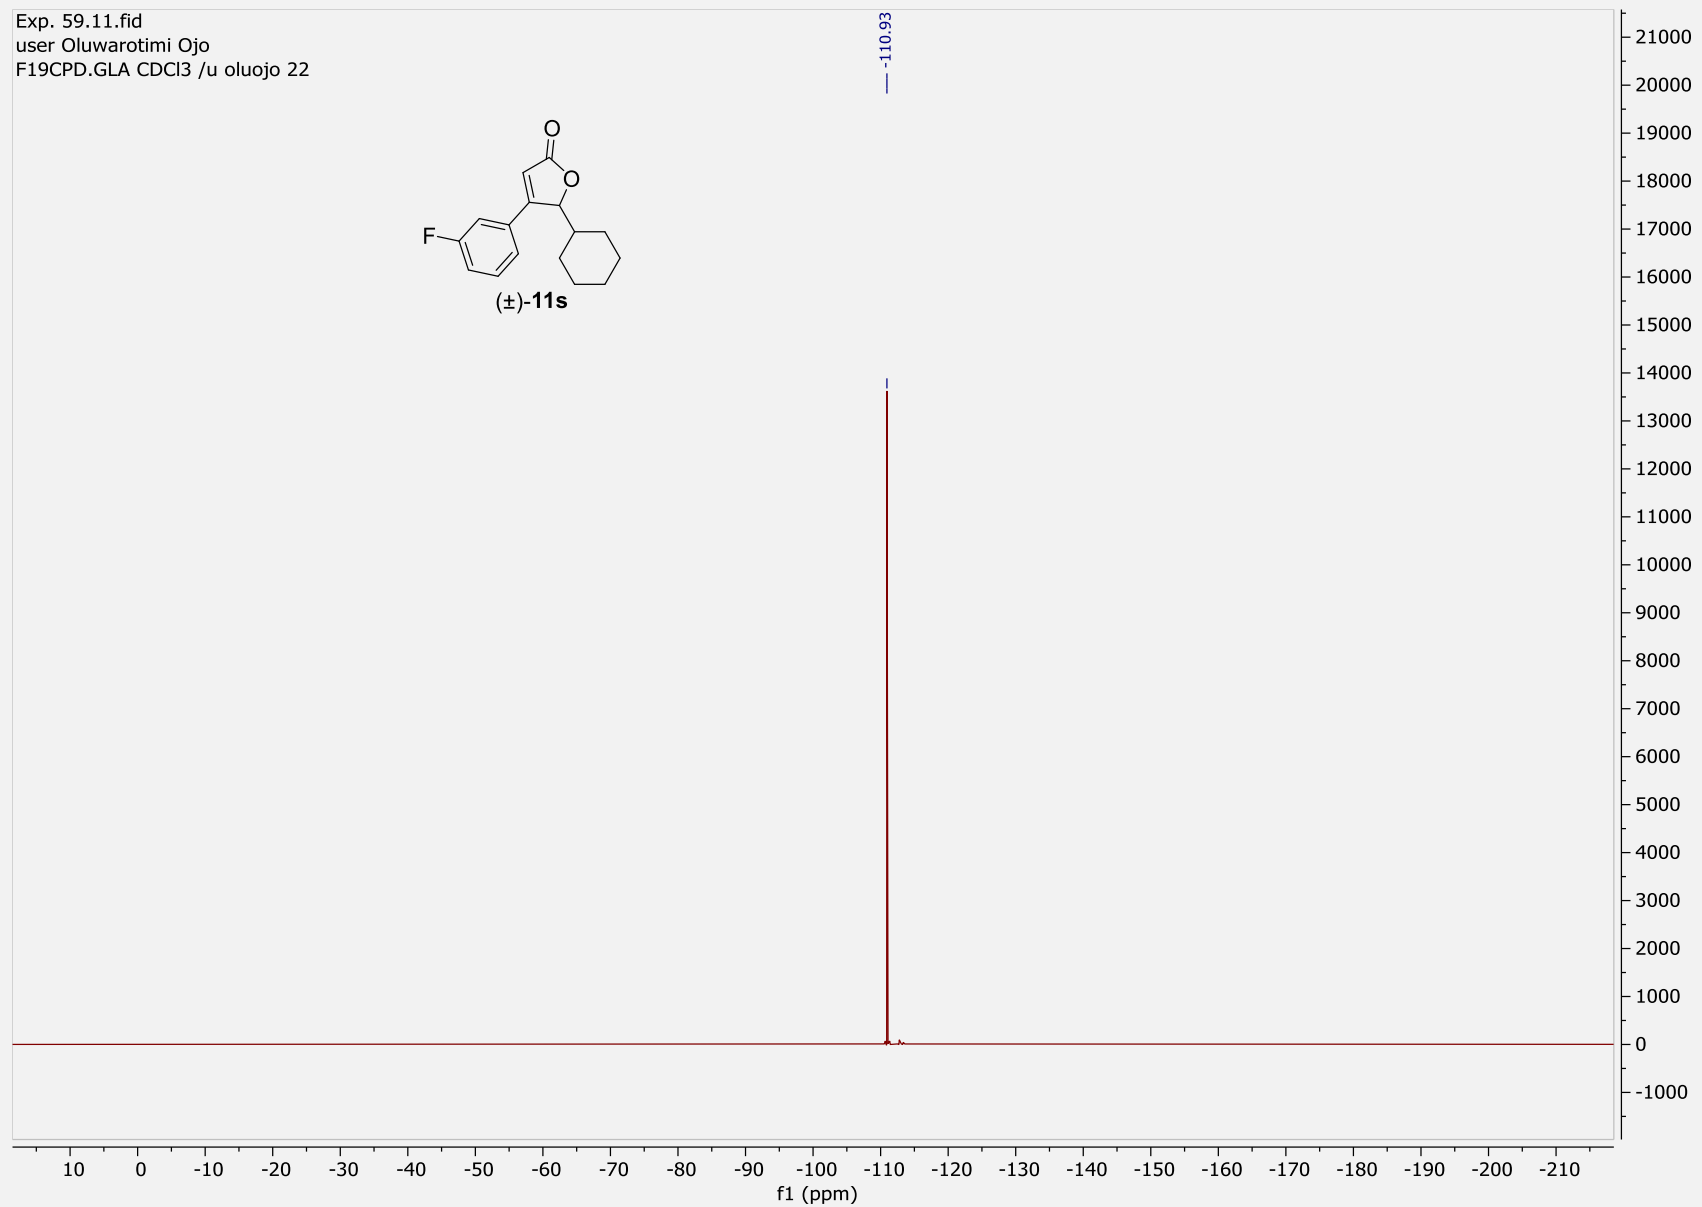

S96



Exp. 57.10.fid  
user Oluwarotimi Ojo  
PROTON.GLA CDCl3 /u oluojo 23

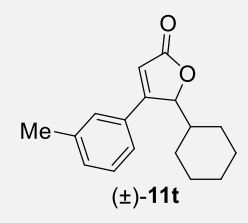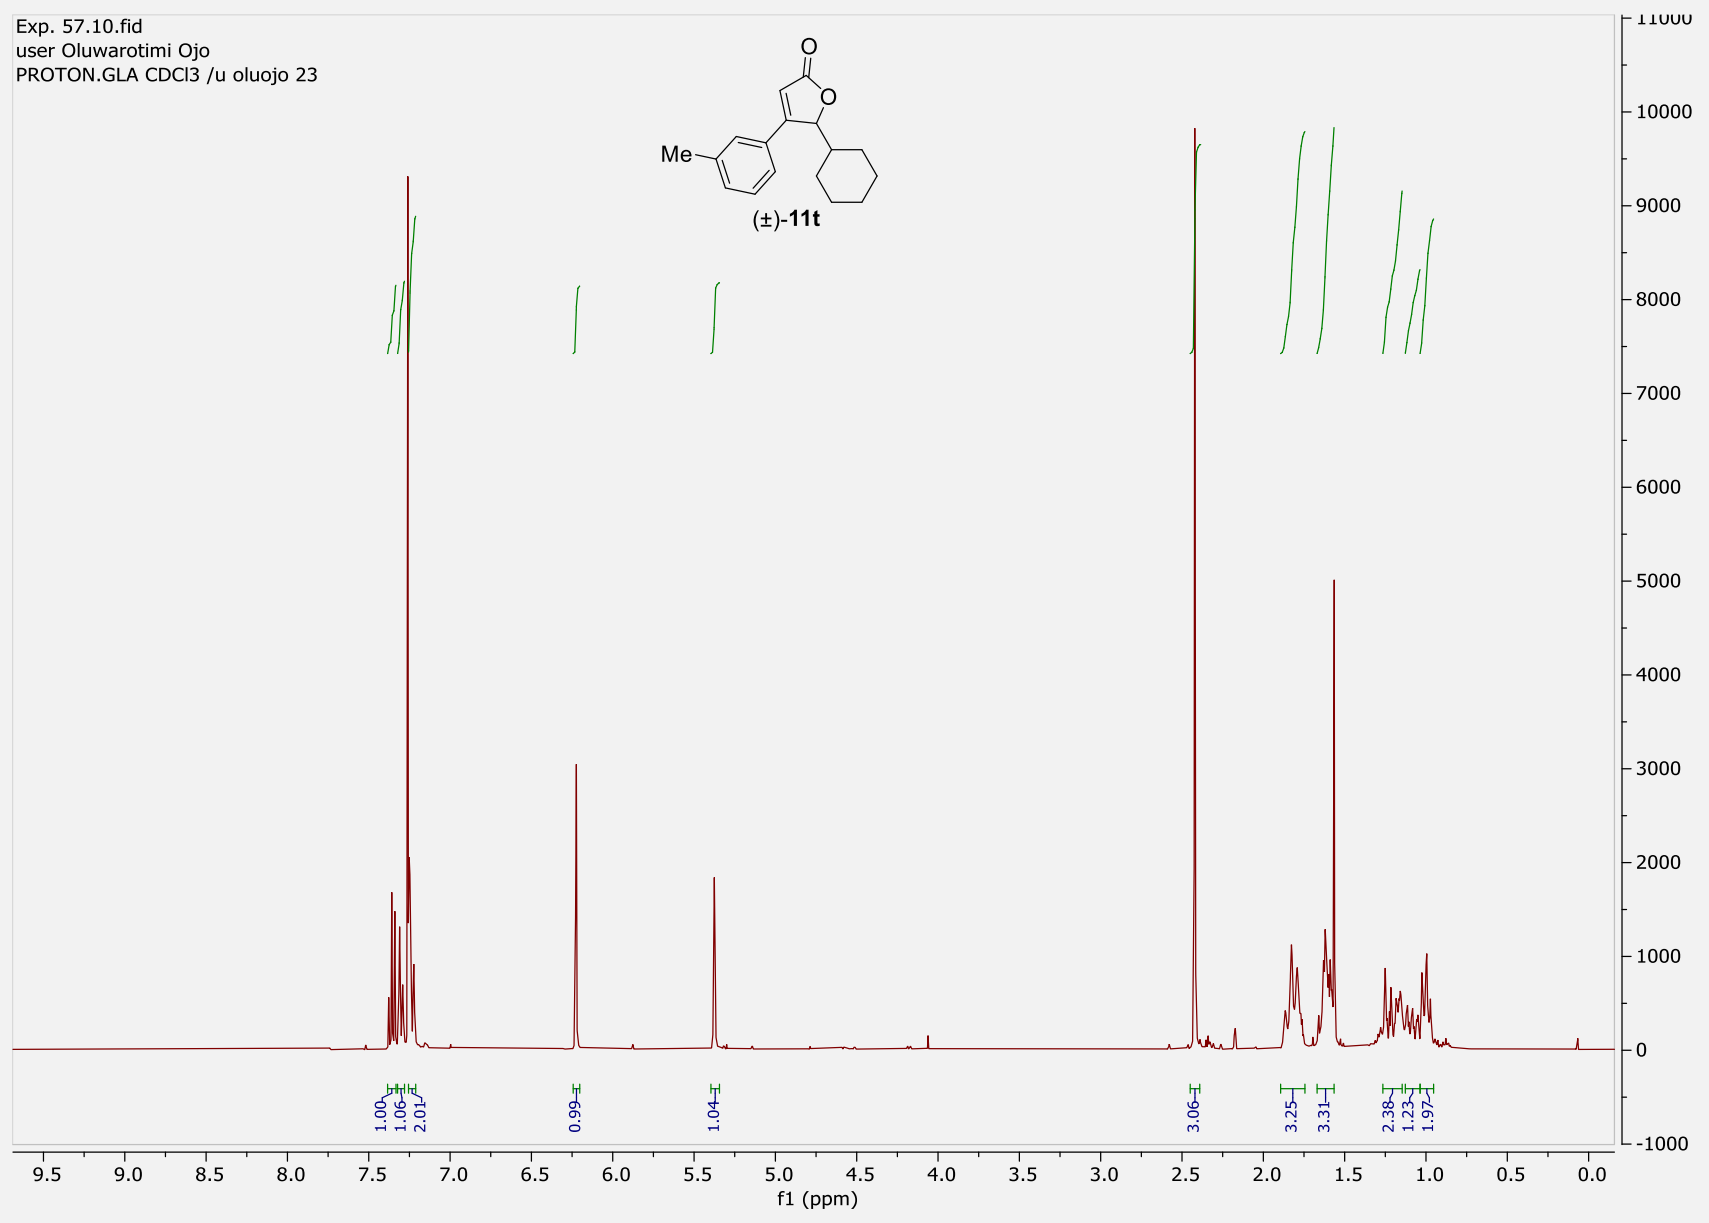

Exp. 57.11.fid

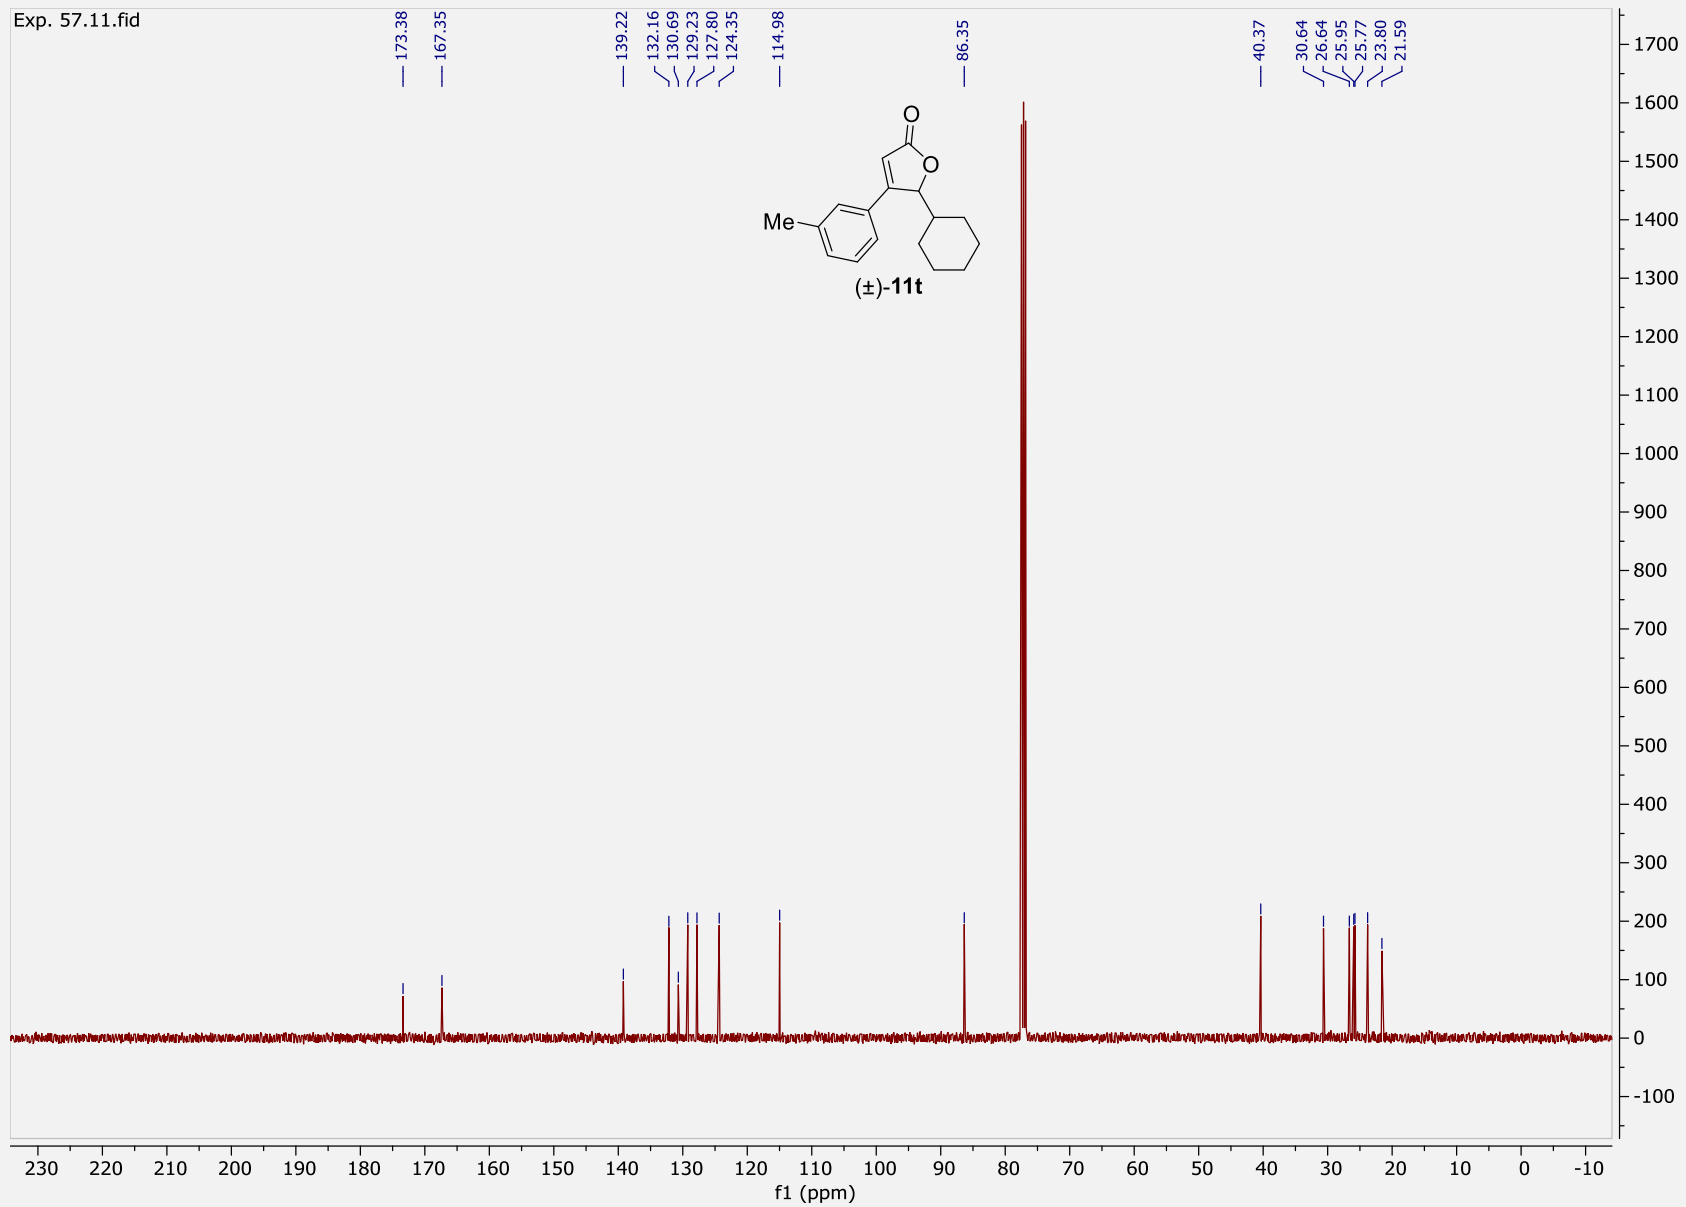

S98

Exp. 56.10.fid

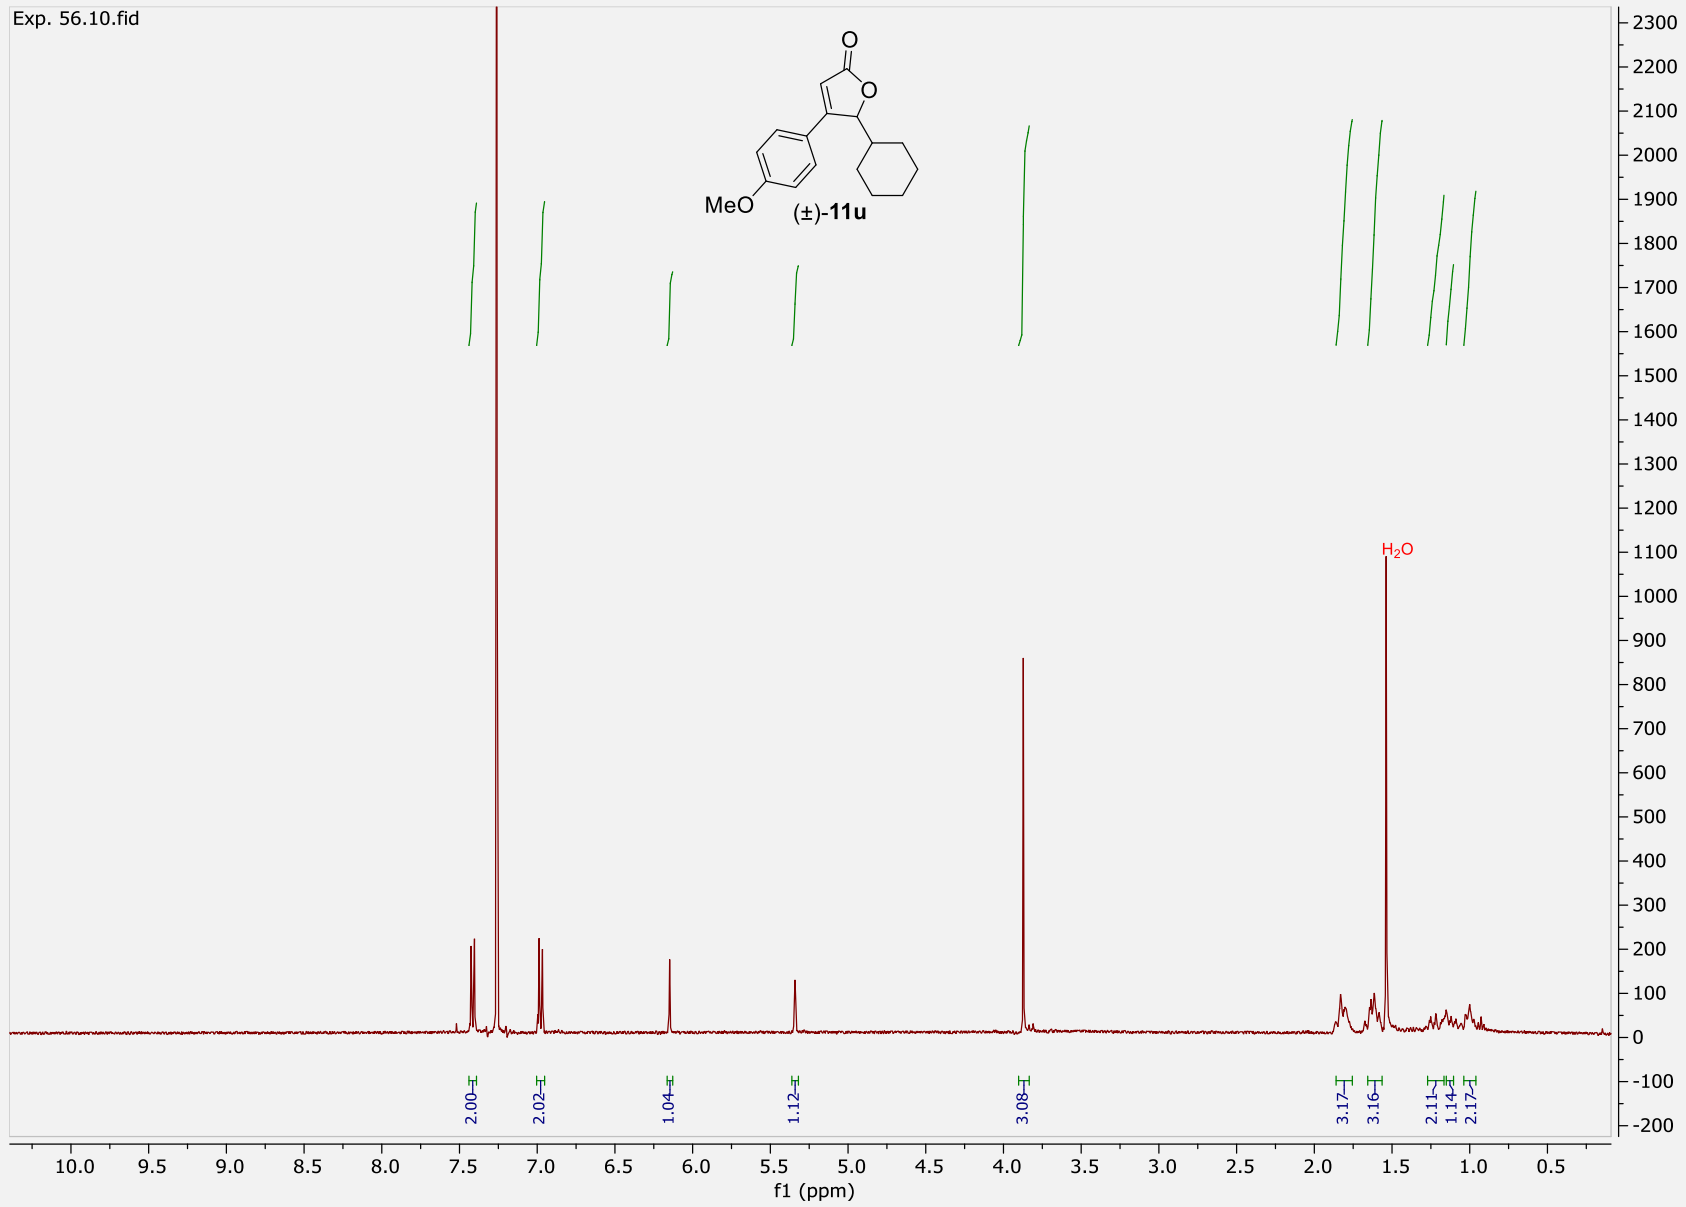

S99

Exp. 56 4-OMe.11.fid

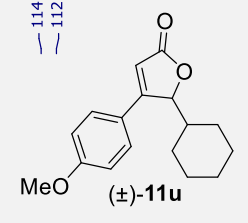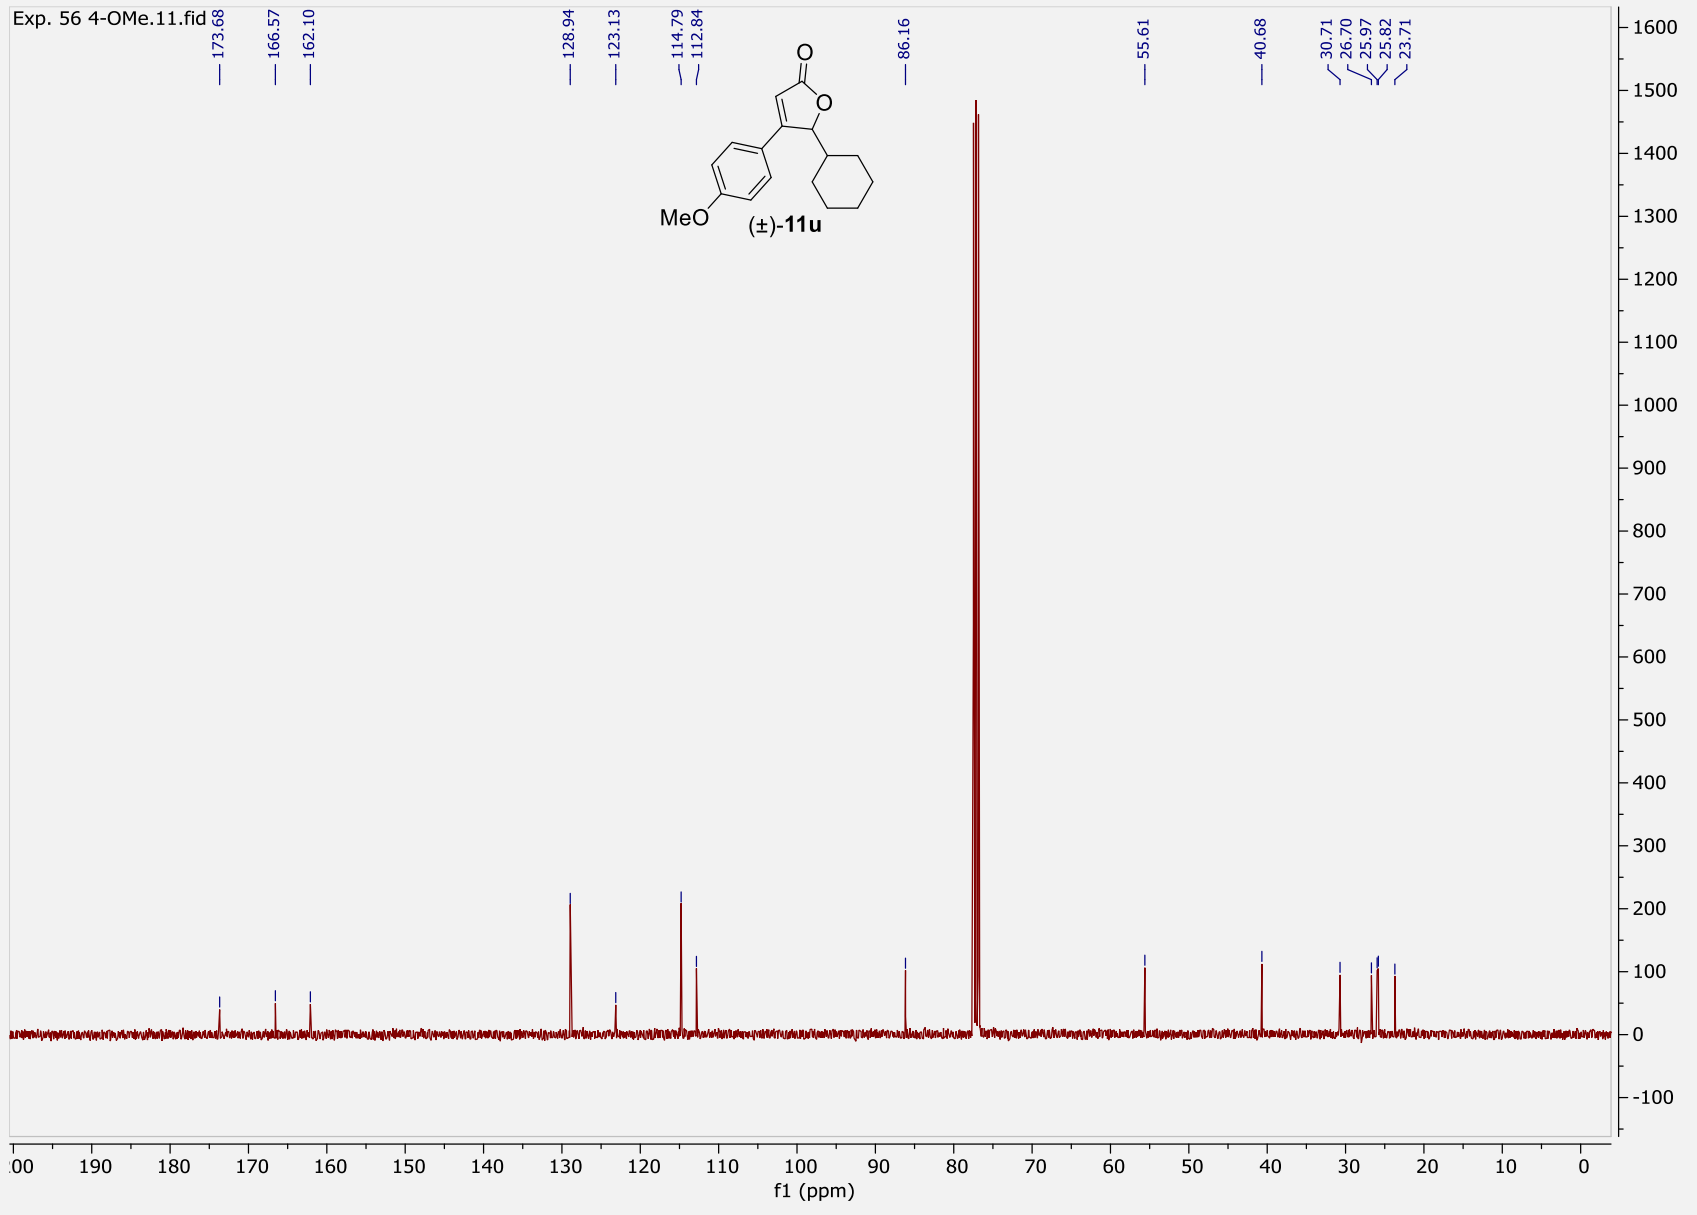

S100

Exp. 58.20.fid  
user Oluwarotimi Ojo  
PROTON.GLA CDCl3 /u oluajo 20

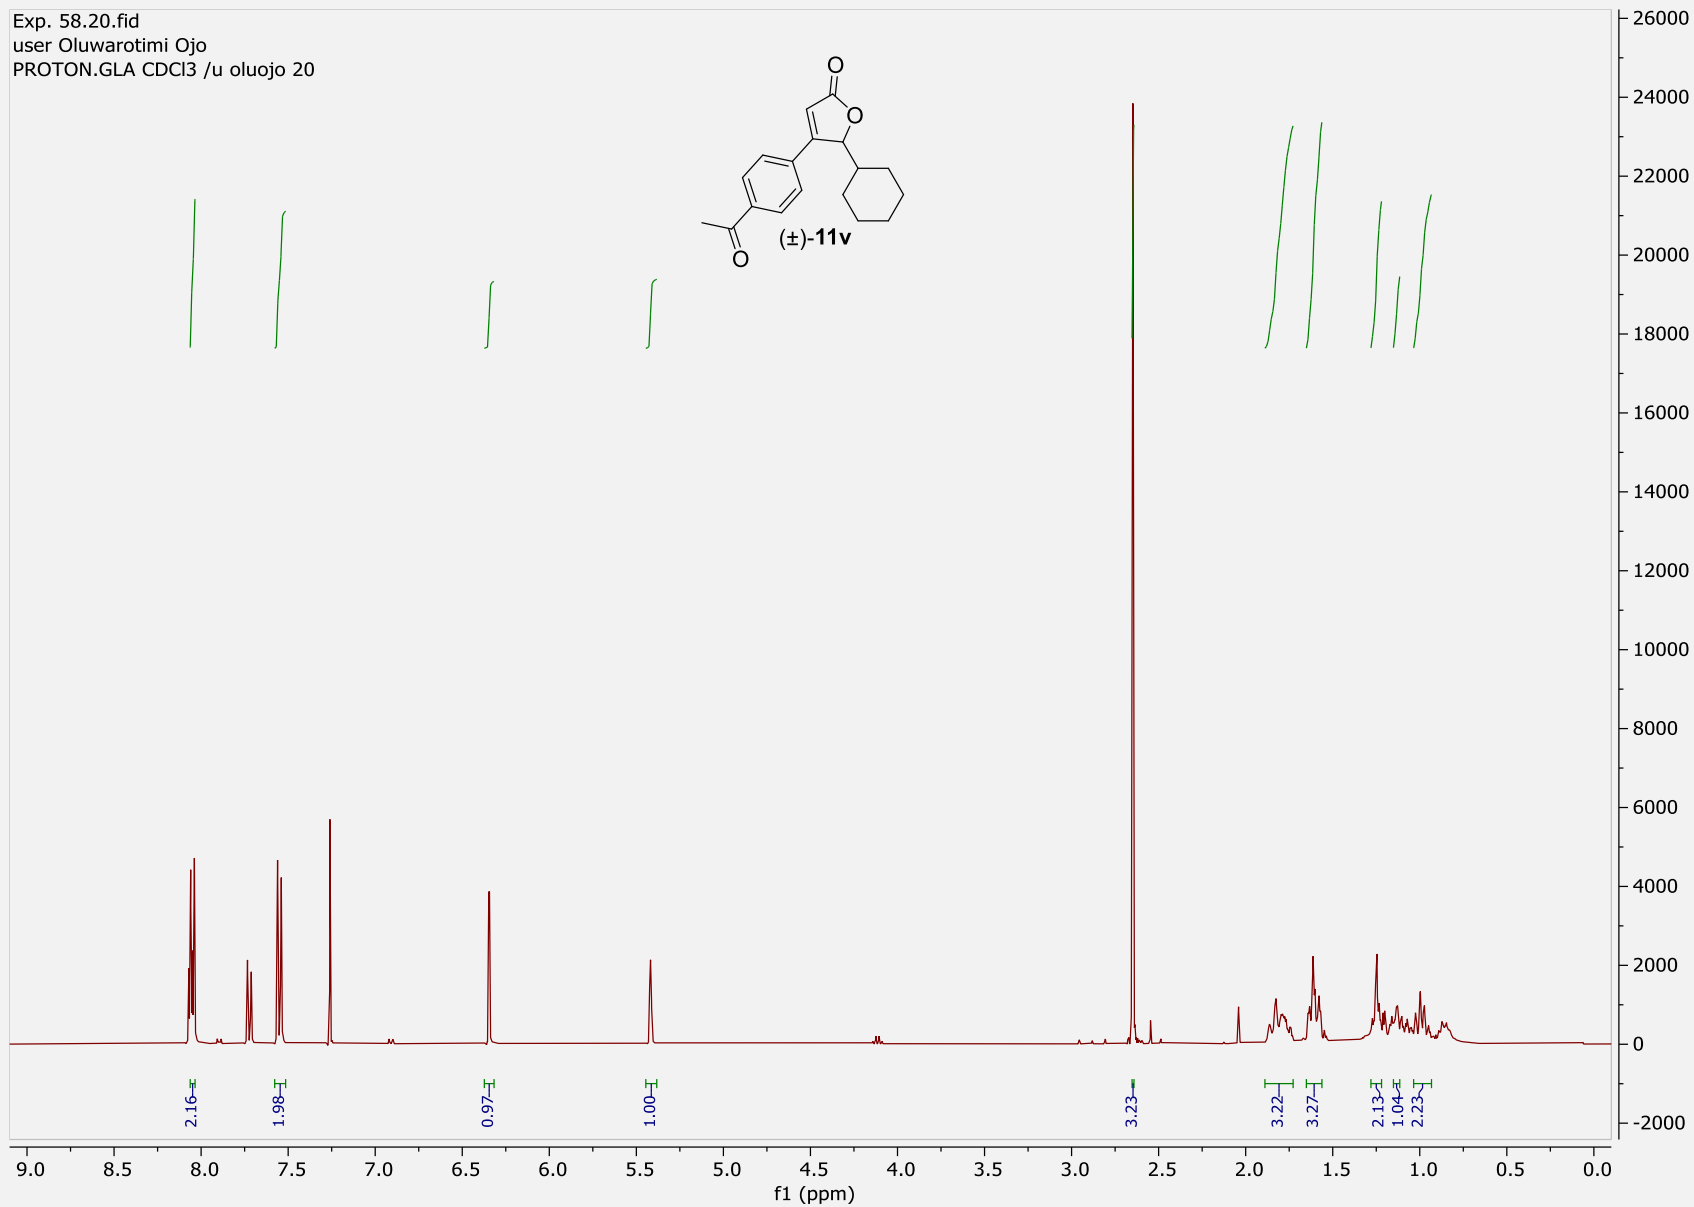

S101

Exp. 29.20.fid

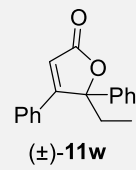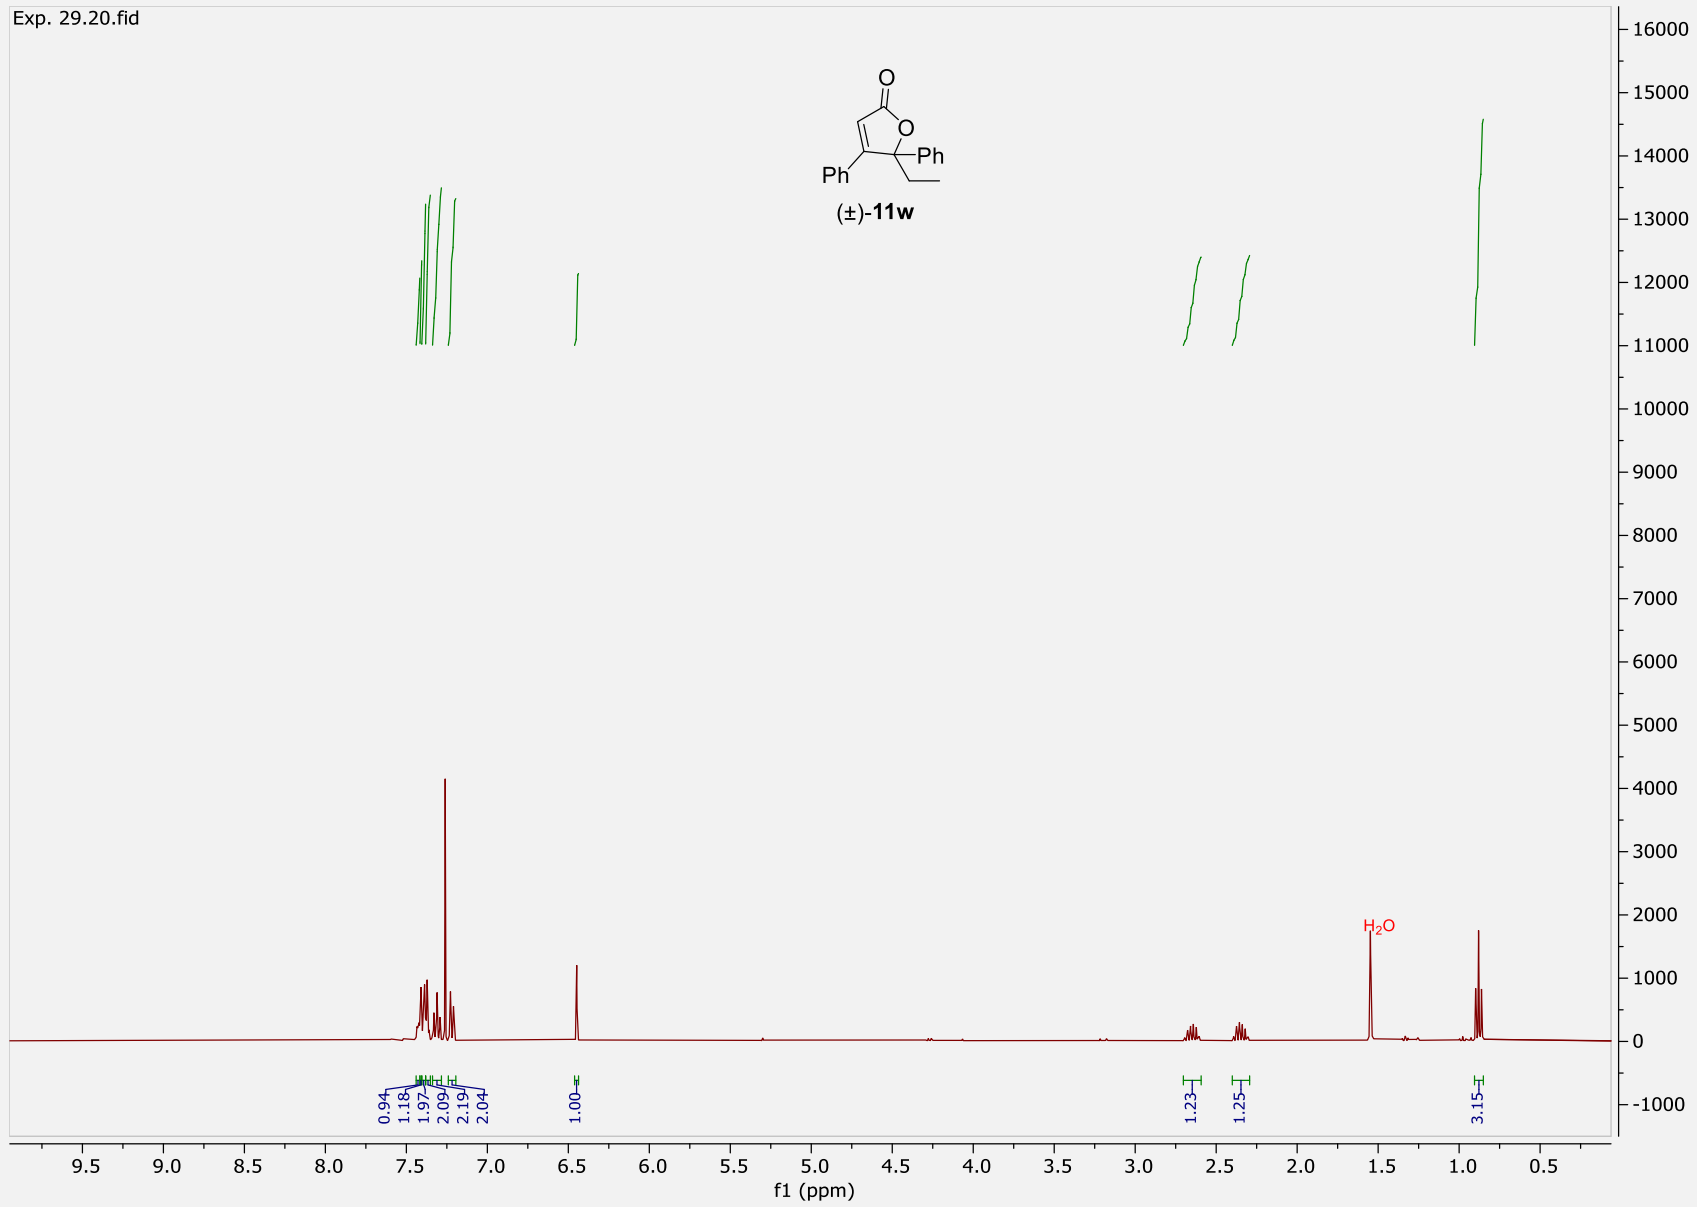

S102

11x.11.fid  
user Oluwarotimi Ojo  
C13CPD256.GLA CDCl<sub>3</sub> / u oluajo 19

138.17  
130.95  
130.52  
129.10  
129.03  
127.86  
126.39

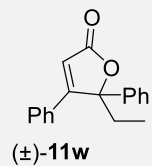

91.73

27.97

7.46

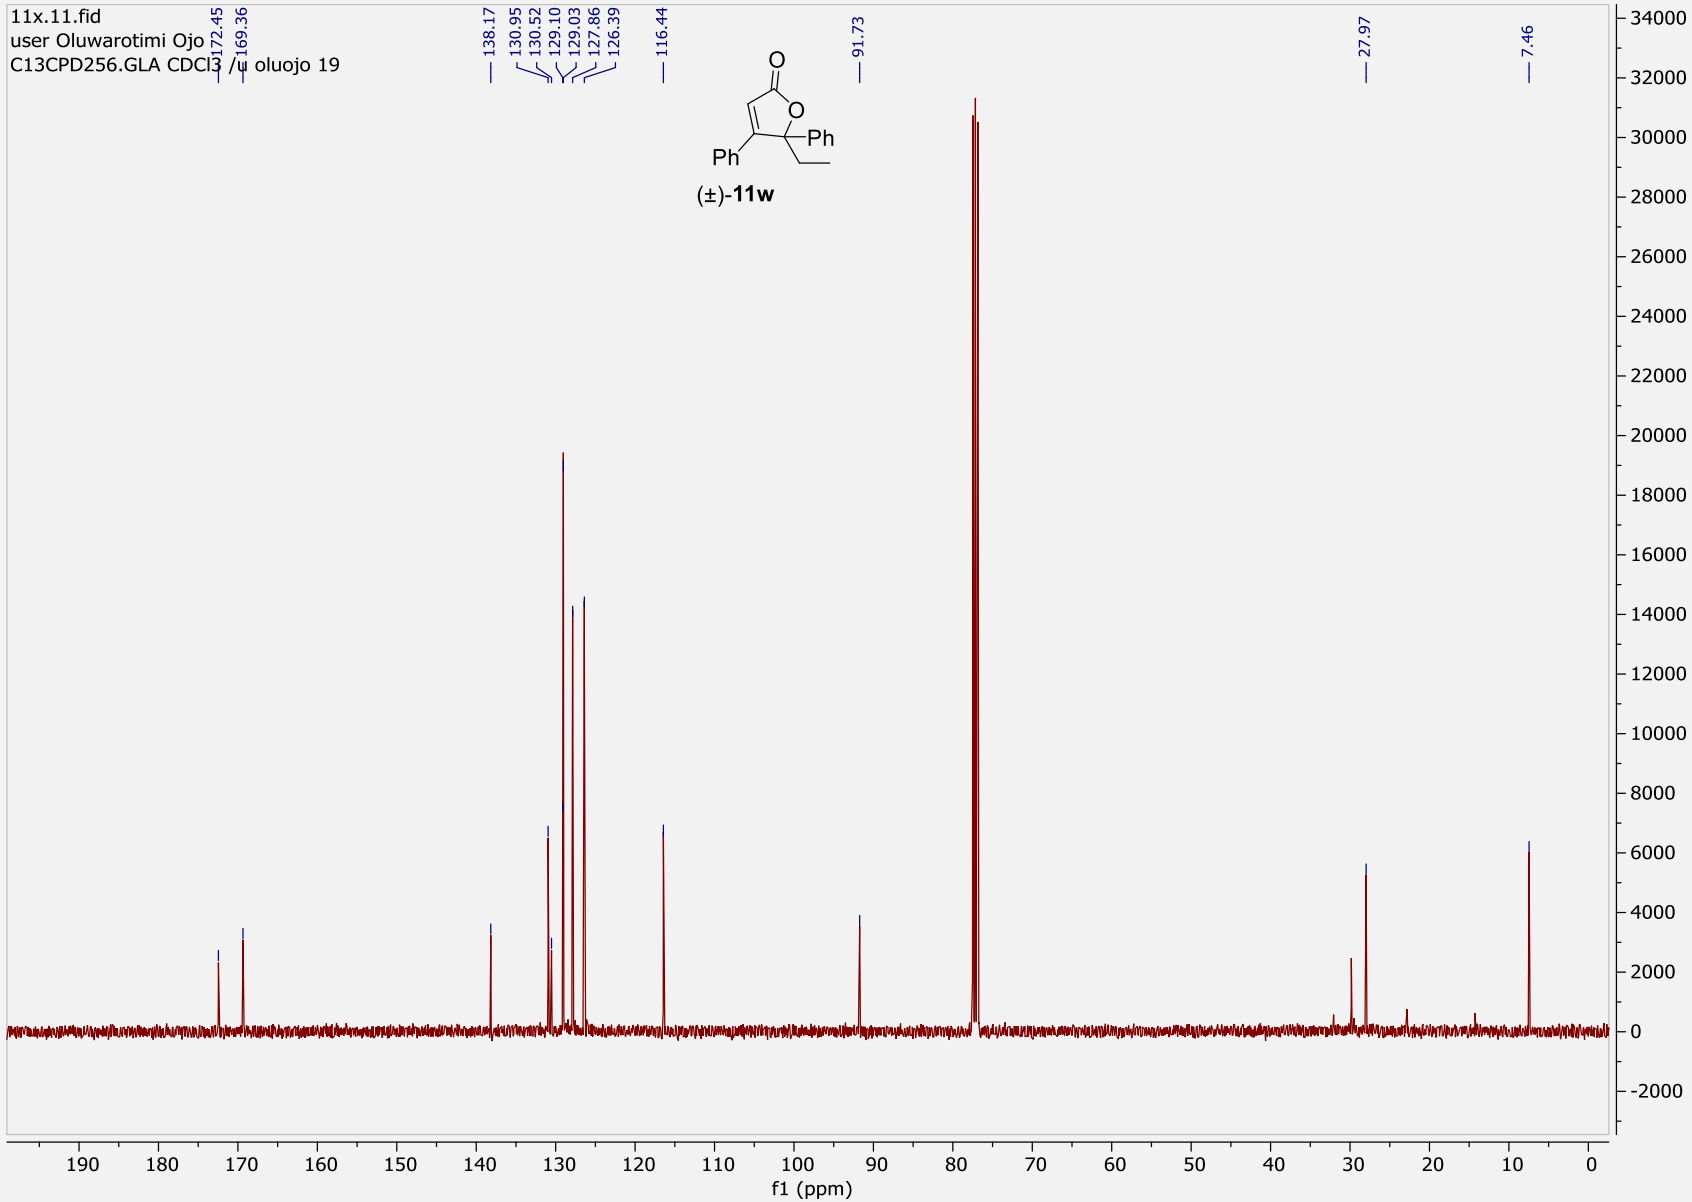

S103

# **$^1\text{H}$ NMR Spectra**

of

**Crude**  *$\gamma$ -Butyrolactones*



Exp. 64\_MeOD 12hr.10.fid

Using methanol-*d*4  
as solvent in the reaction.

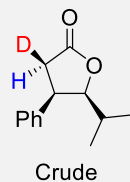

H<sup>d</sup>

H<sup>c</sup>

H<sup>a</sup>

H<sup>b</sup>

H<sup>e</sup>

Exp. 48\_MeOD.10.fid

Using undeuterated methanol  
as solvent in the reaction.

$^3J_{1H-1H}$  Couplings

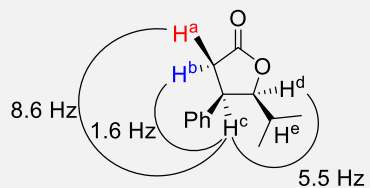

dd  
 $J = 10.1,$   
5.5 Hz

ddd  
 $J = 8.6, 5.5,$   
1.6 Hz

dd  
 $J = 17.5,$   
8.6 Hz

dd  
 $J = 17.5,$   
1.6 Hz

dp  
 $J = 10.1,$   
6.6 Hz

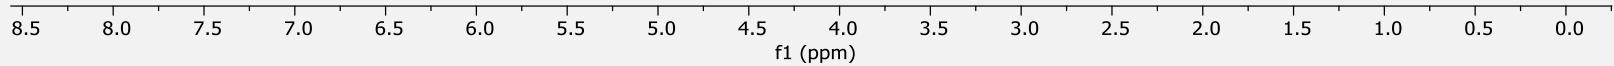

Dec04-2022.10.fid  
HS-01

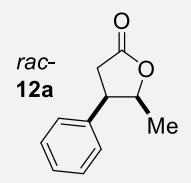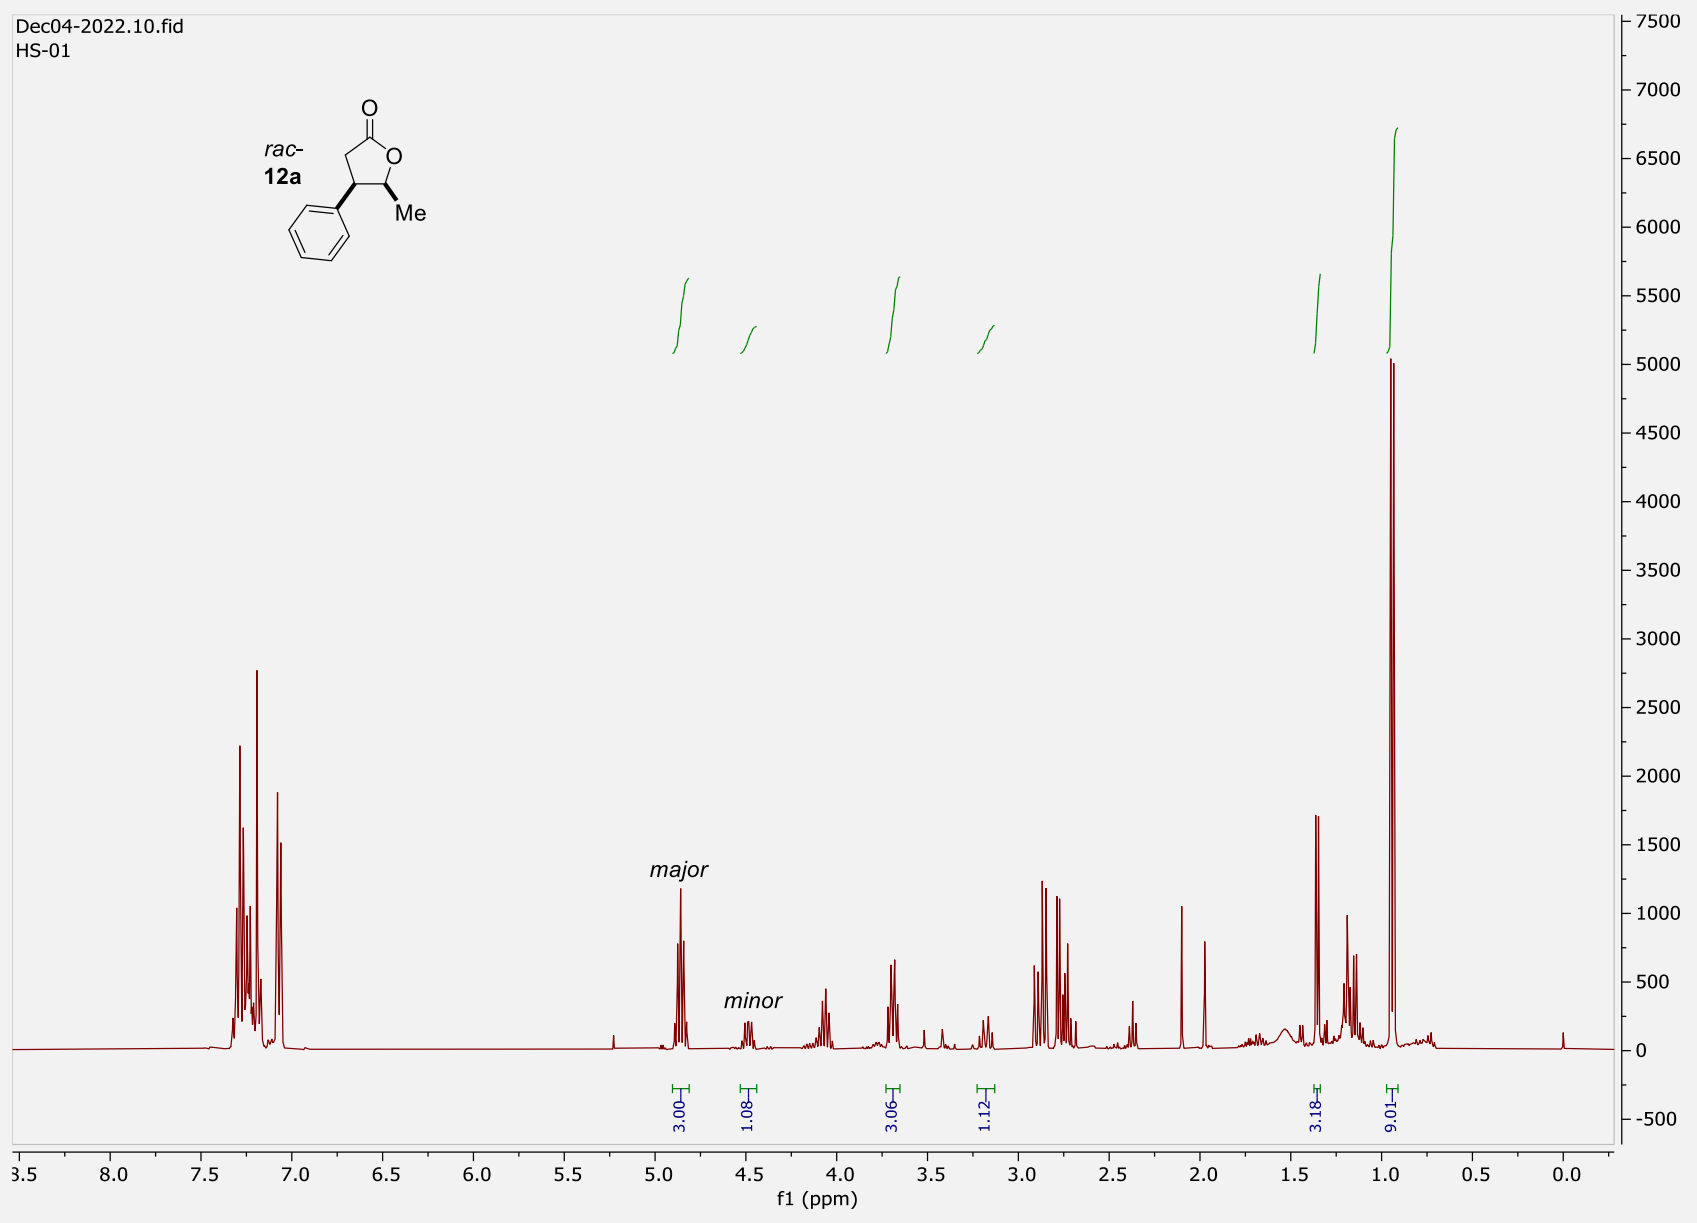

S106

Dec07-2022.10.fid  
HS-02 repeat

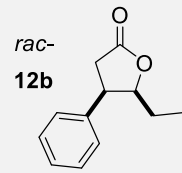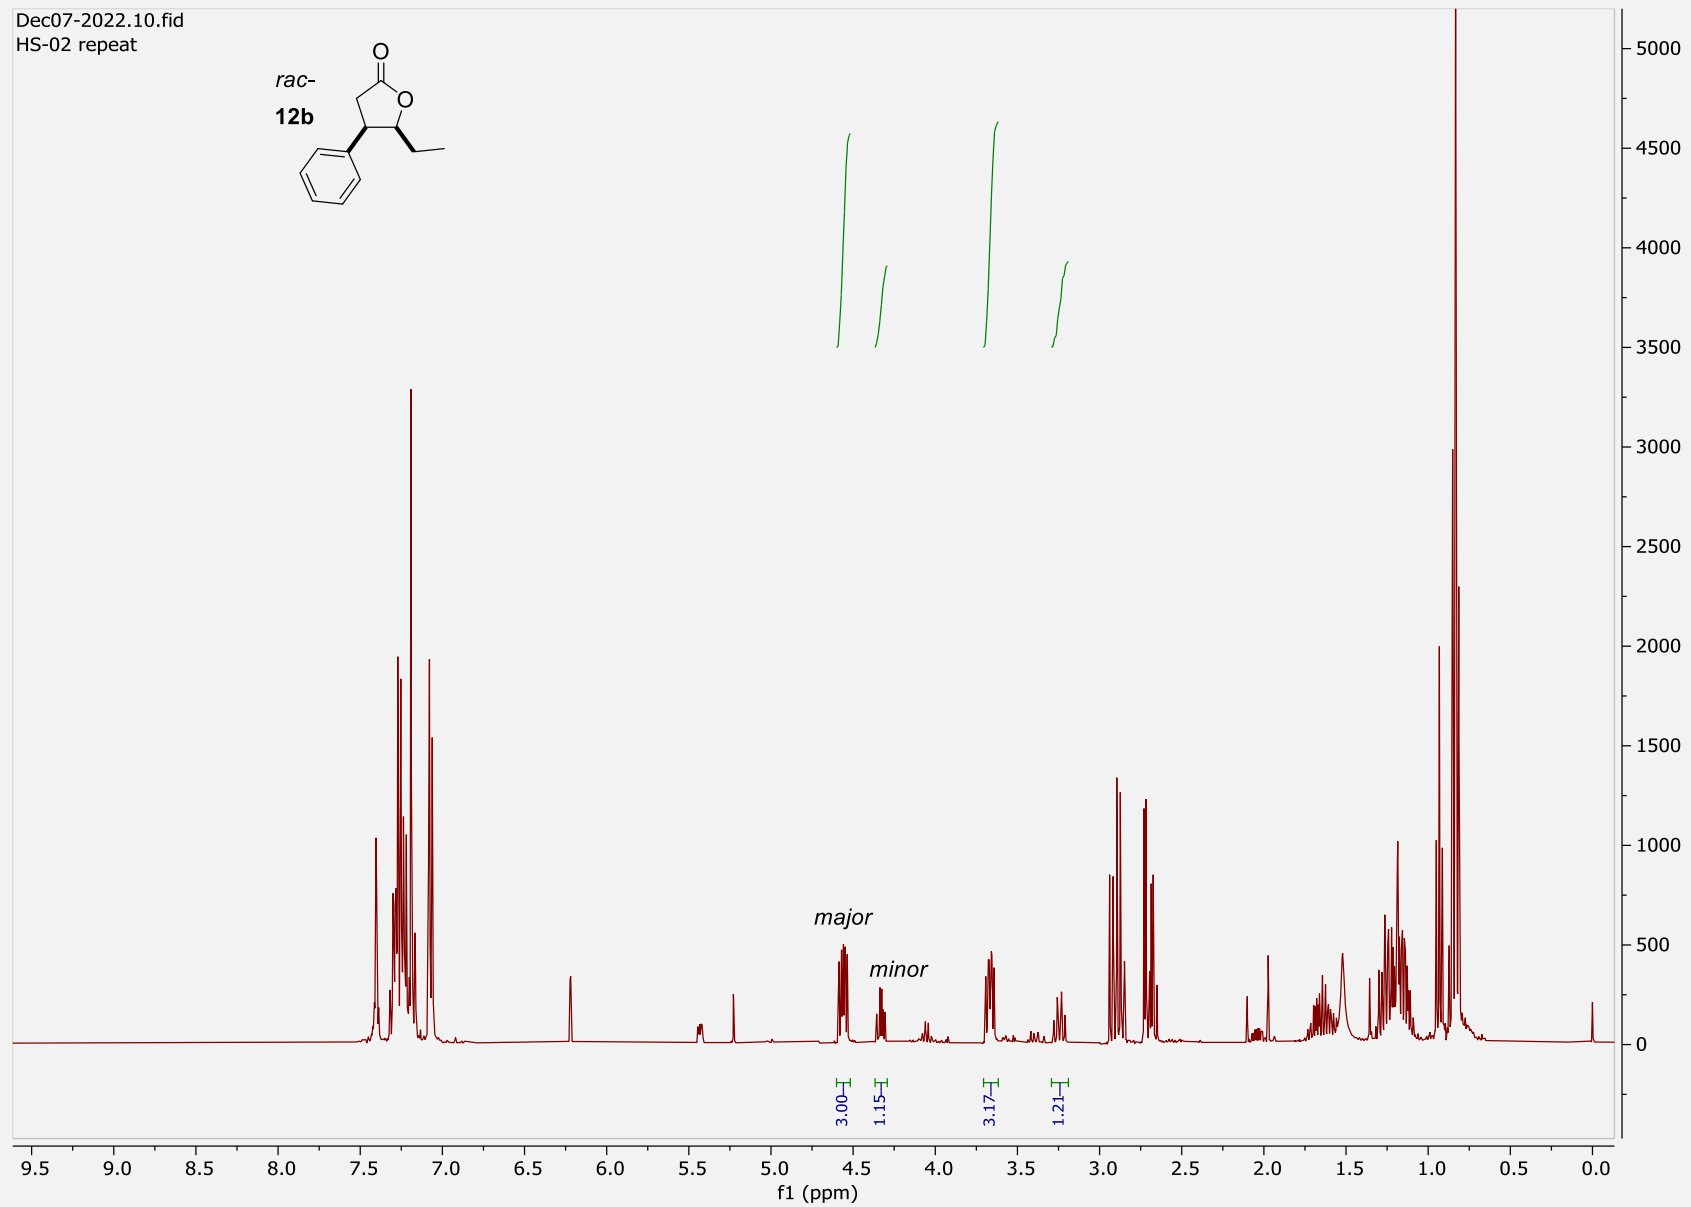

S107

Feb11-2023.20.fid  
Exp. 48 crude i-Pr 5 mol% of NiCl2.6H2O

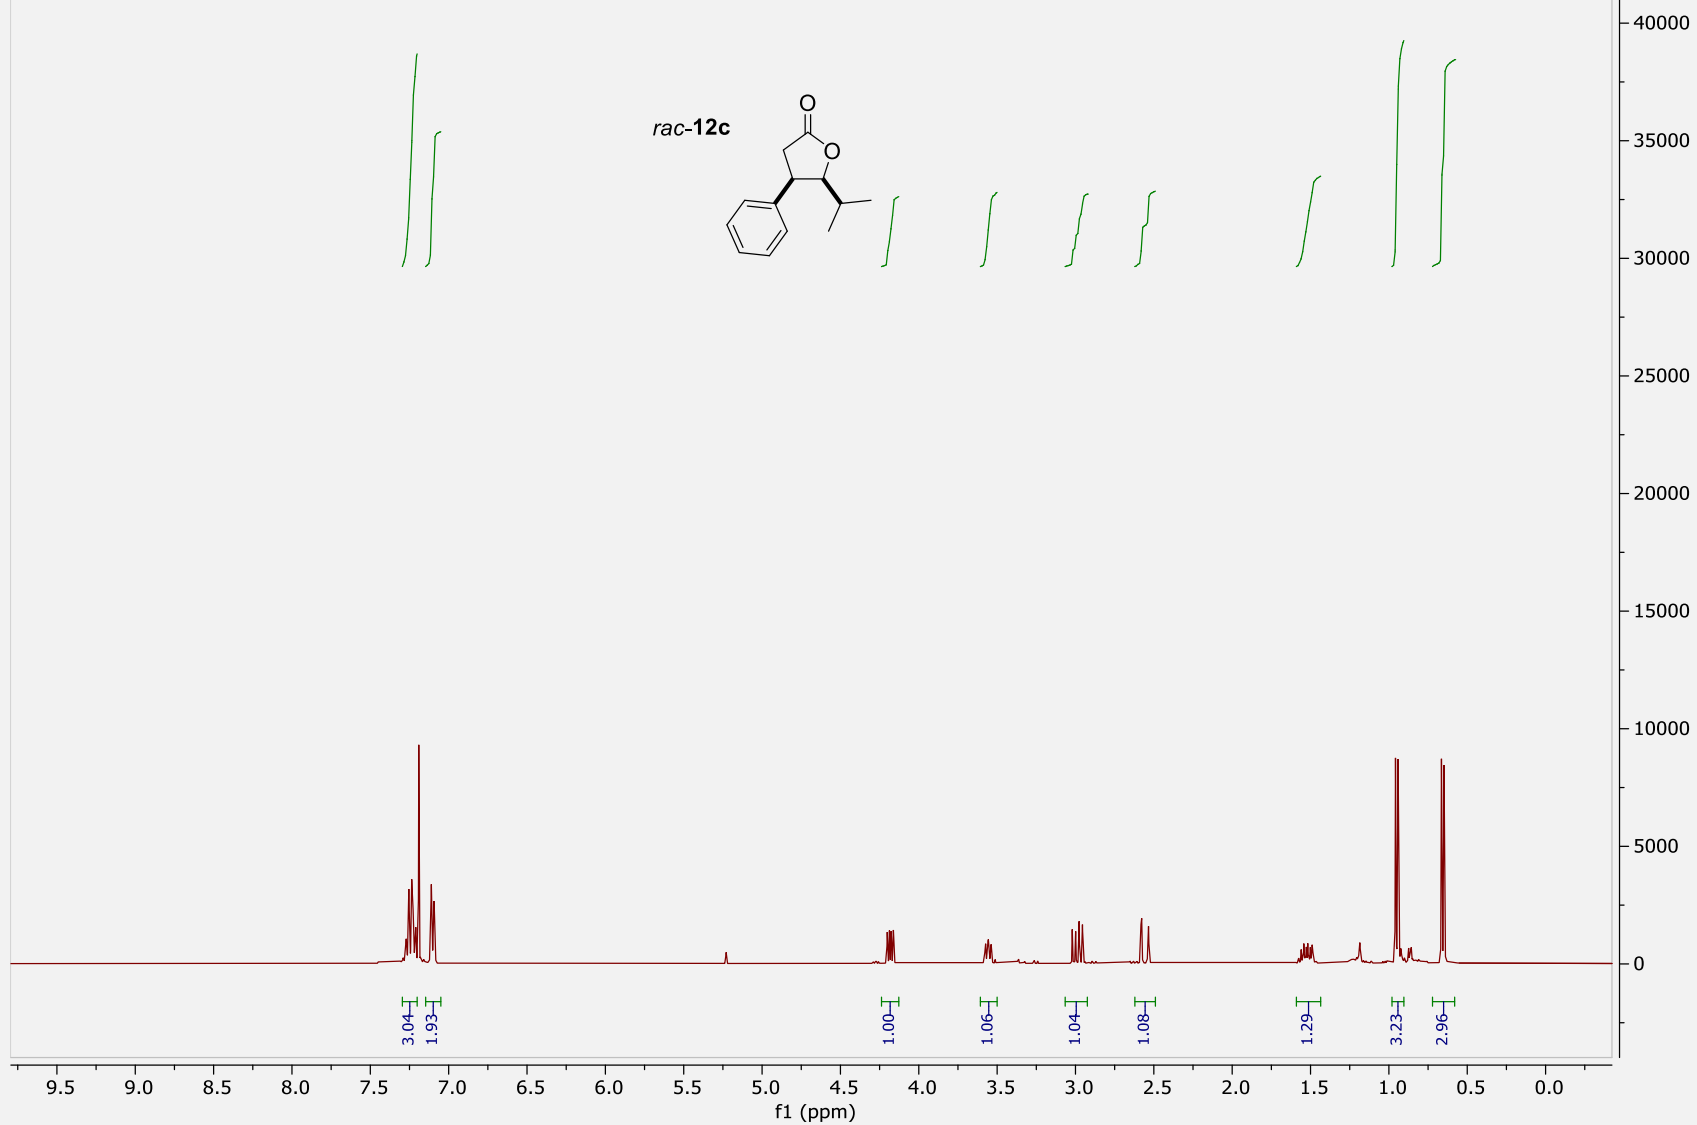

S108

Jan11-2023.10.fid  
HS-08

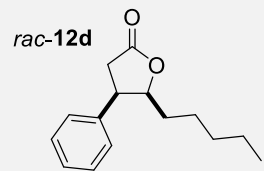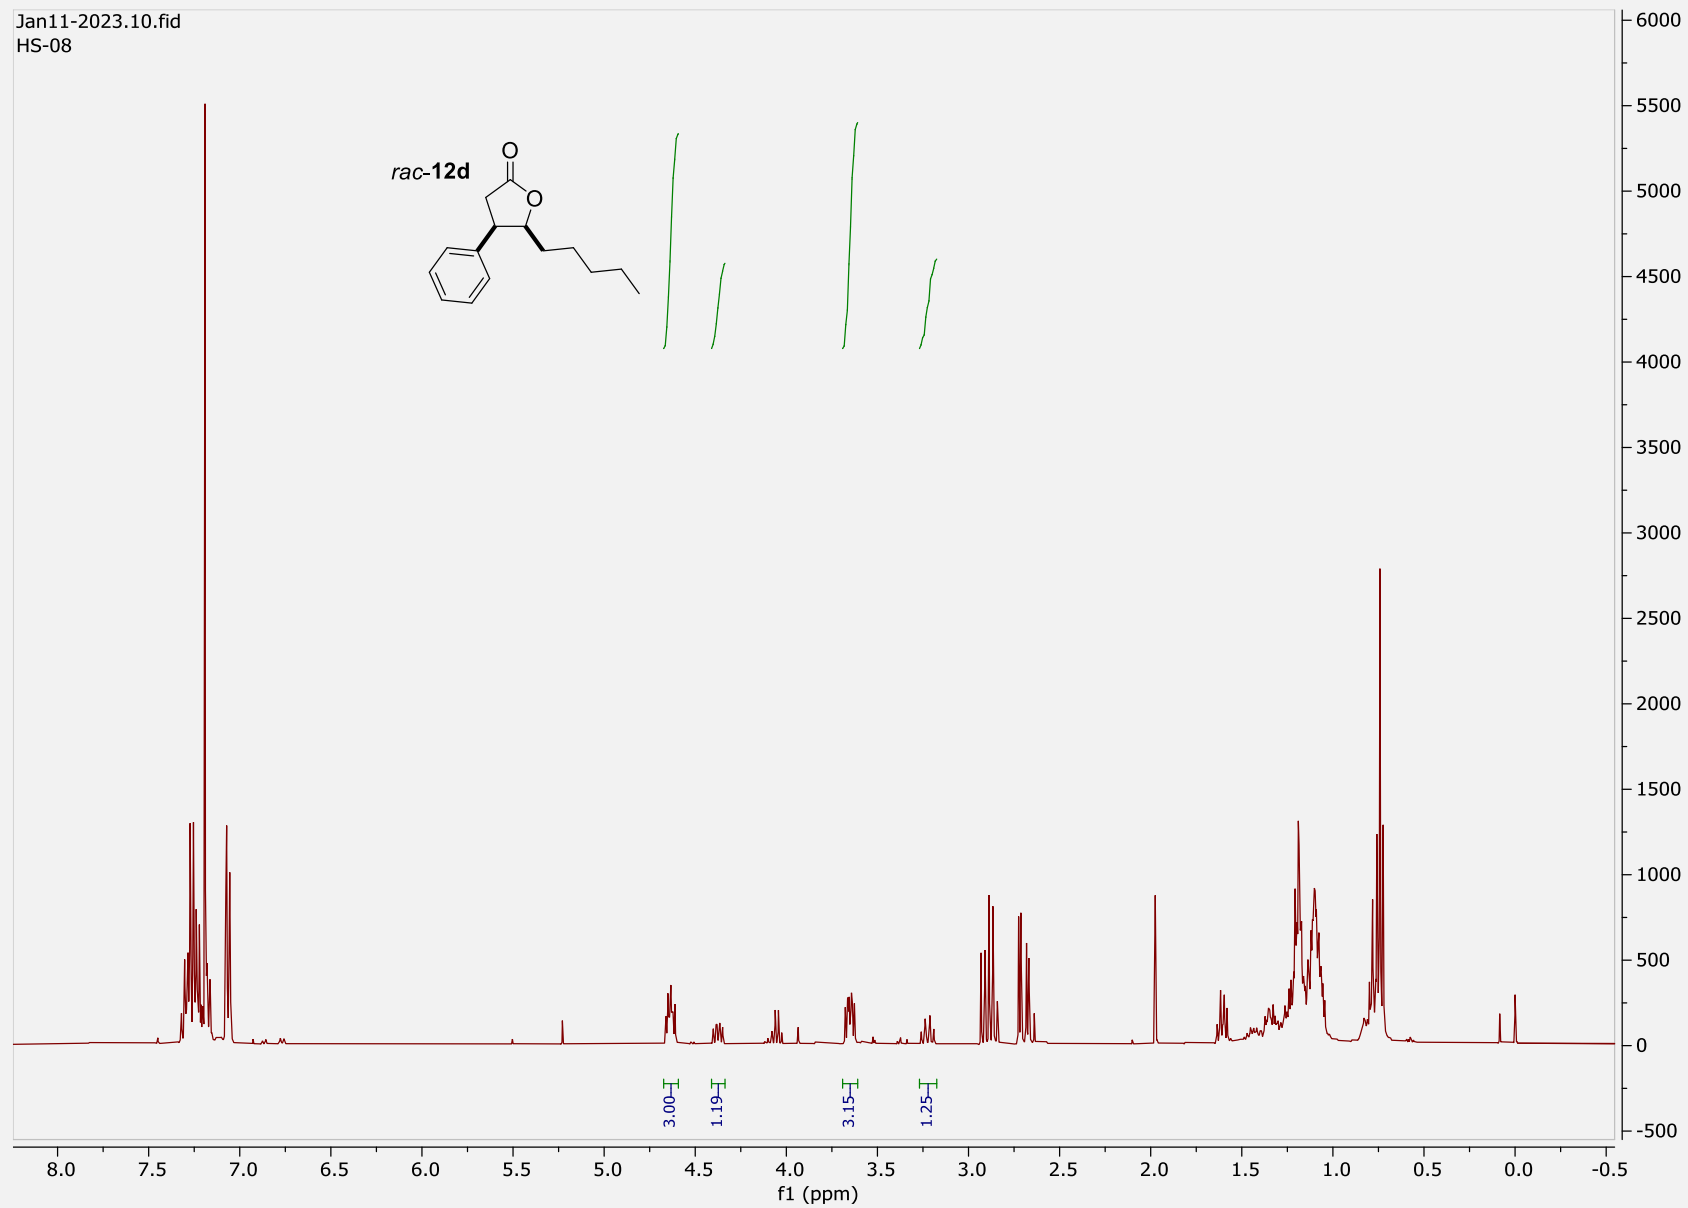

S109

Feb09-2023.30.fid  
Exp. 45 crude cyclopropane

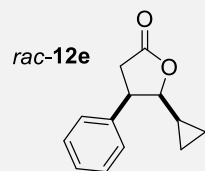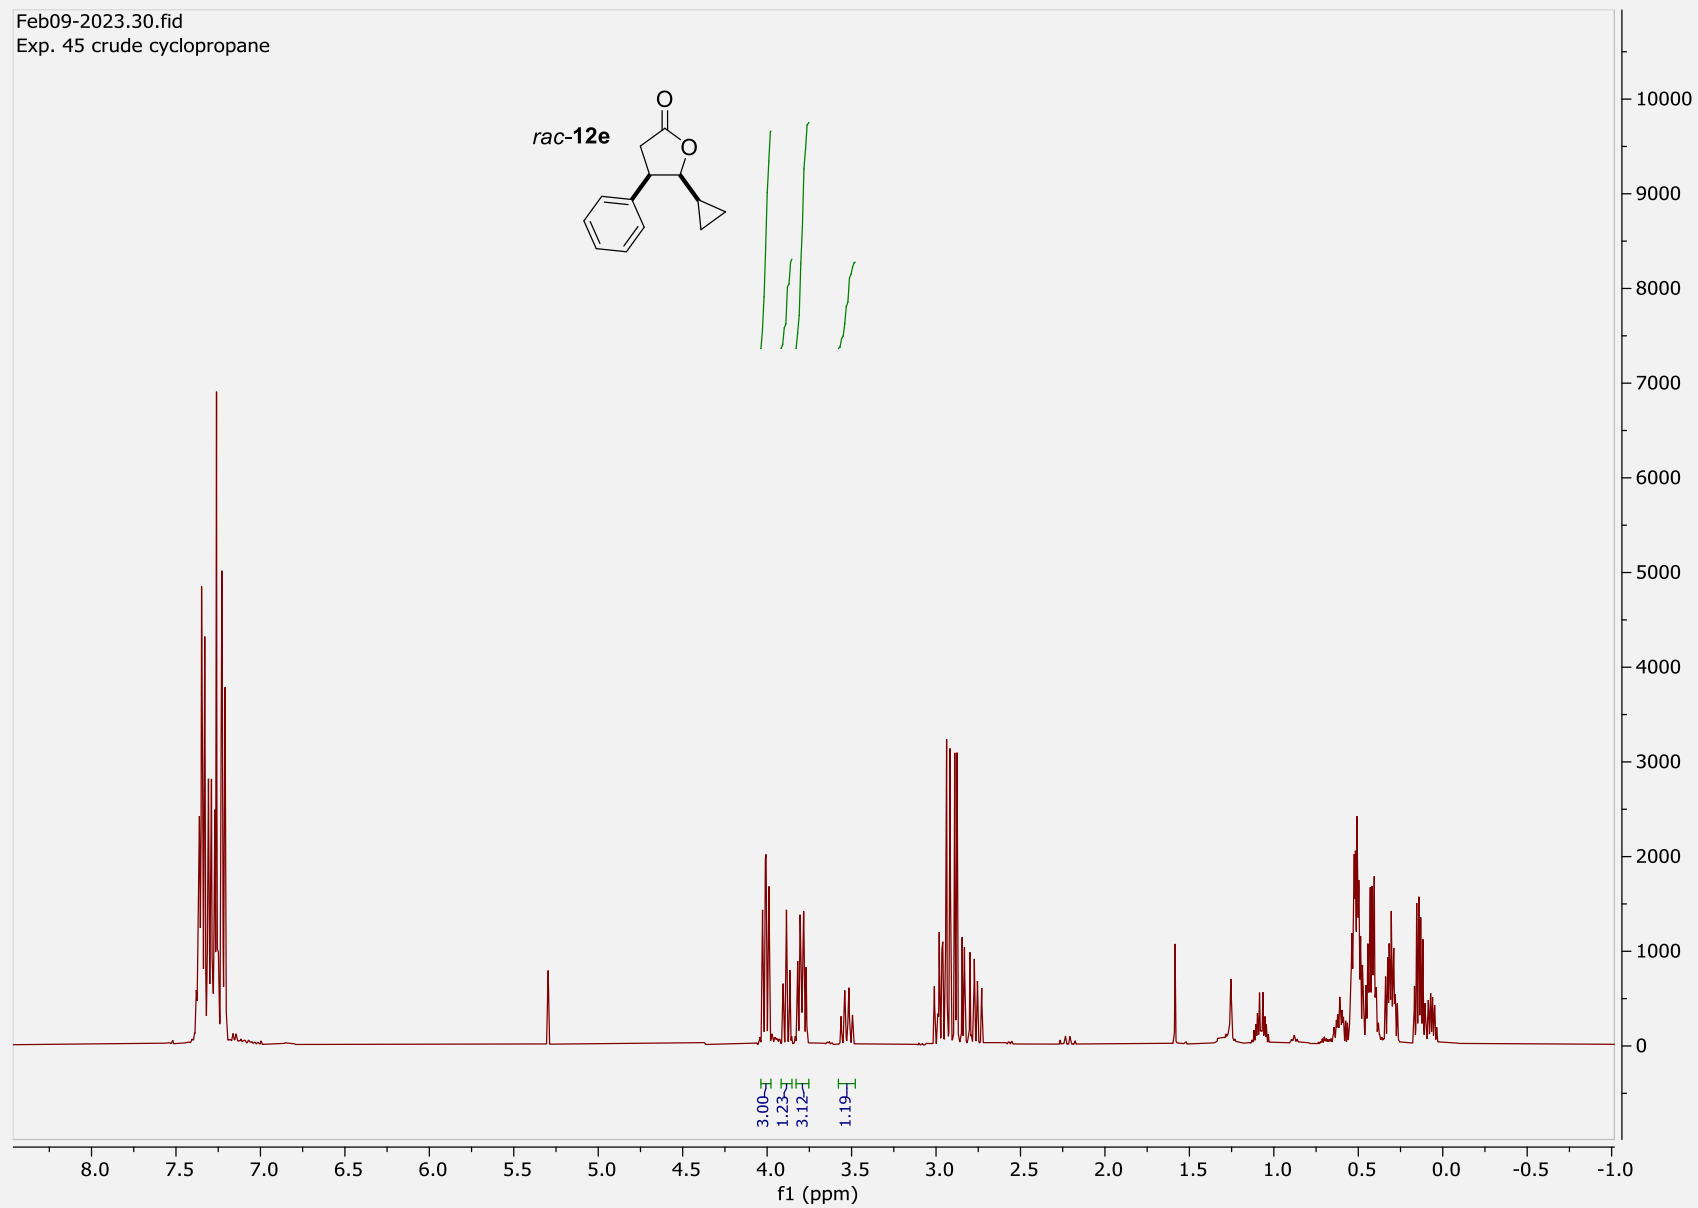

S110

Feb09-2023.20.fid  
Exp. 46 crude cyclobutane

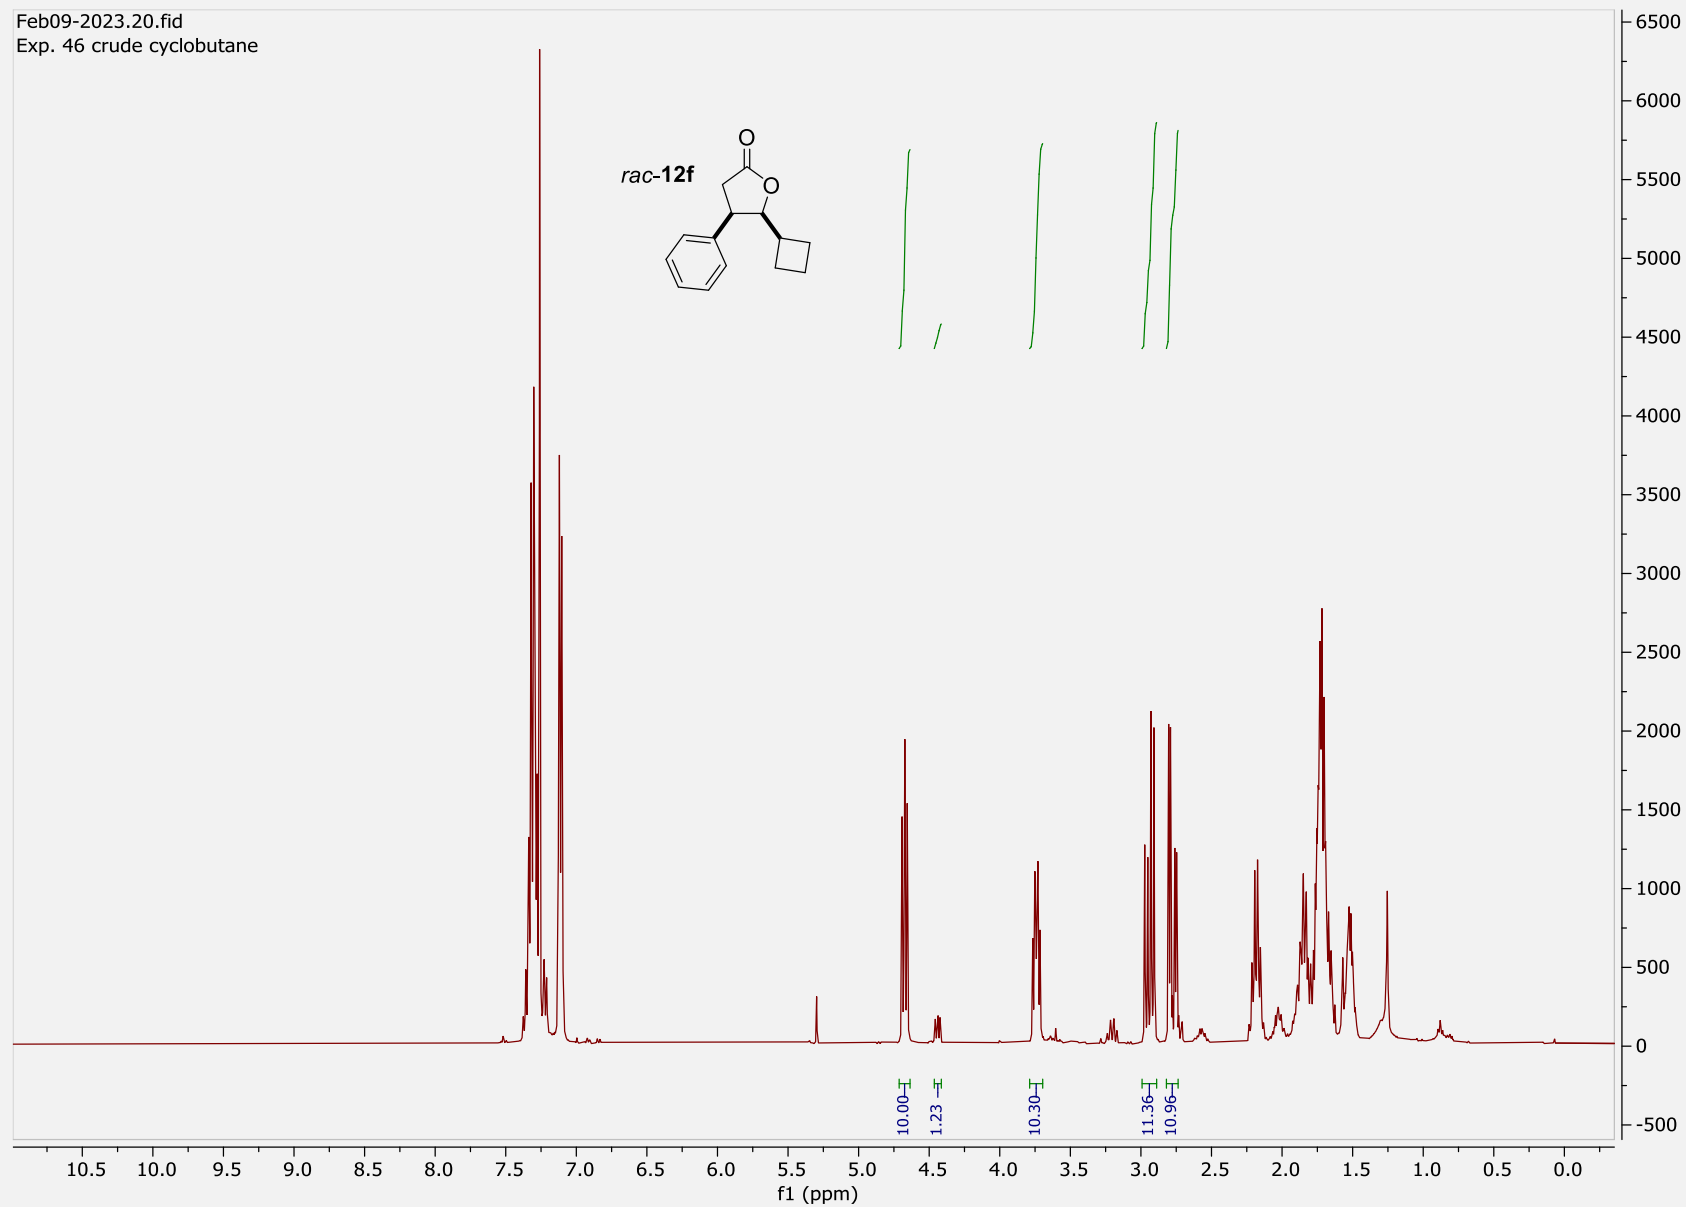

S111

Feb11-2023.10.fid  
Exp. 47 crude cyclopentane rac

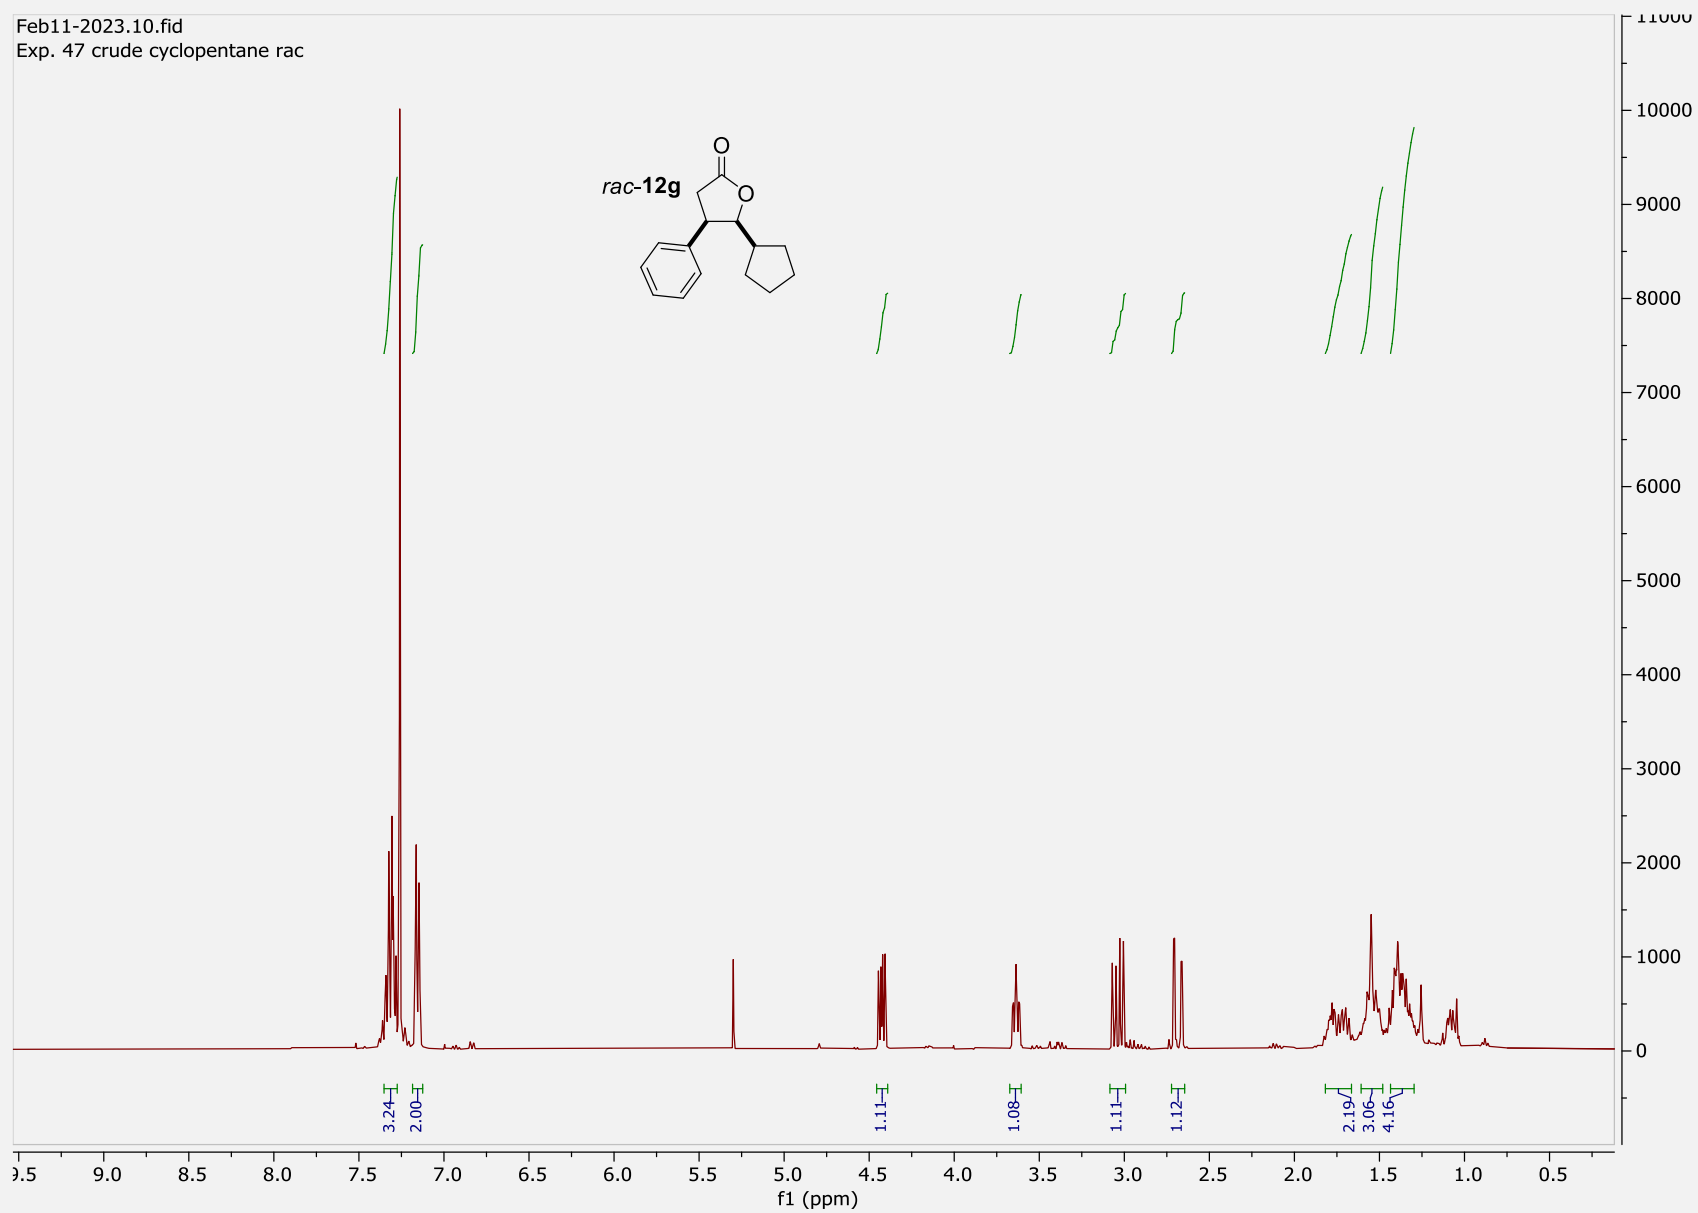

S112



Dec10-2022.10.fid  
HS-04 crude

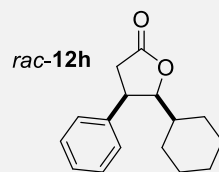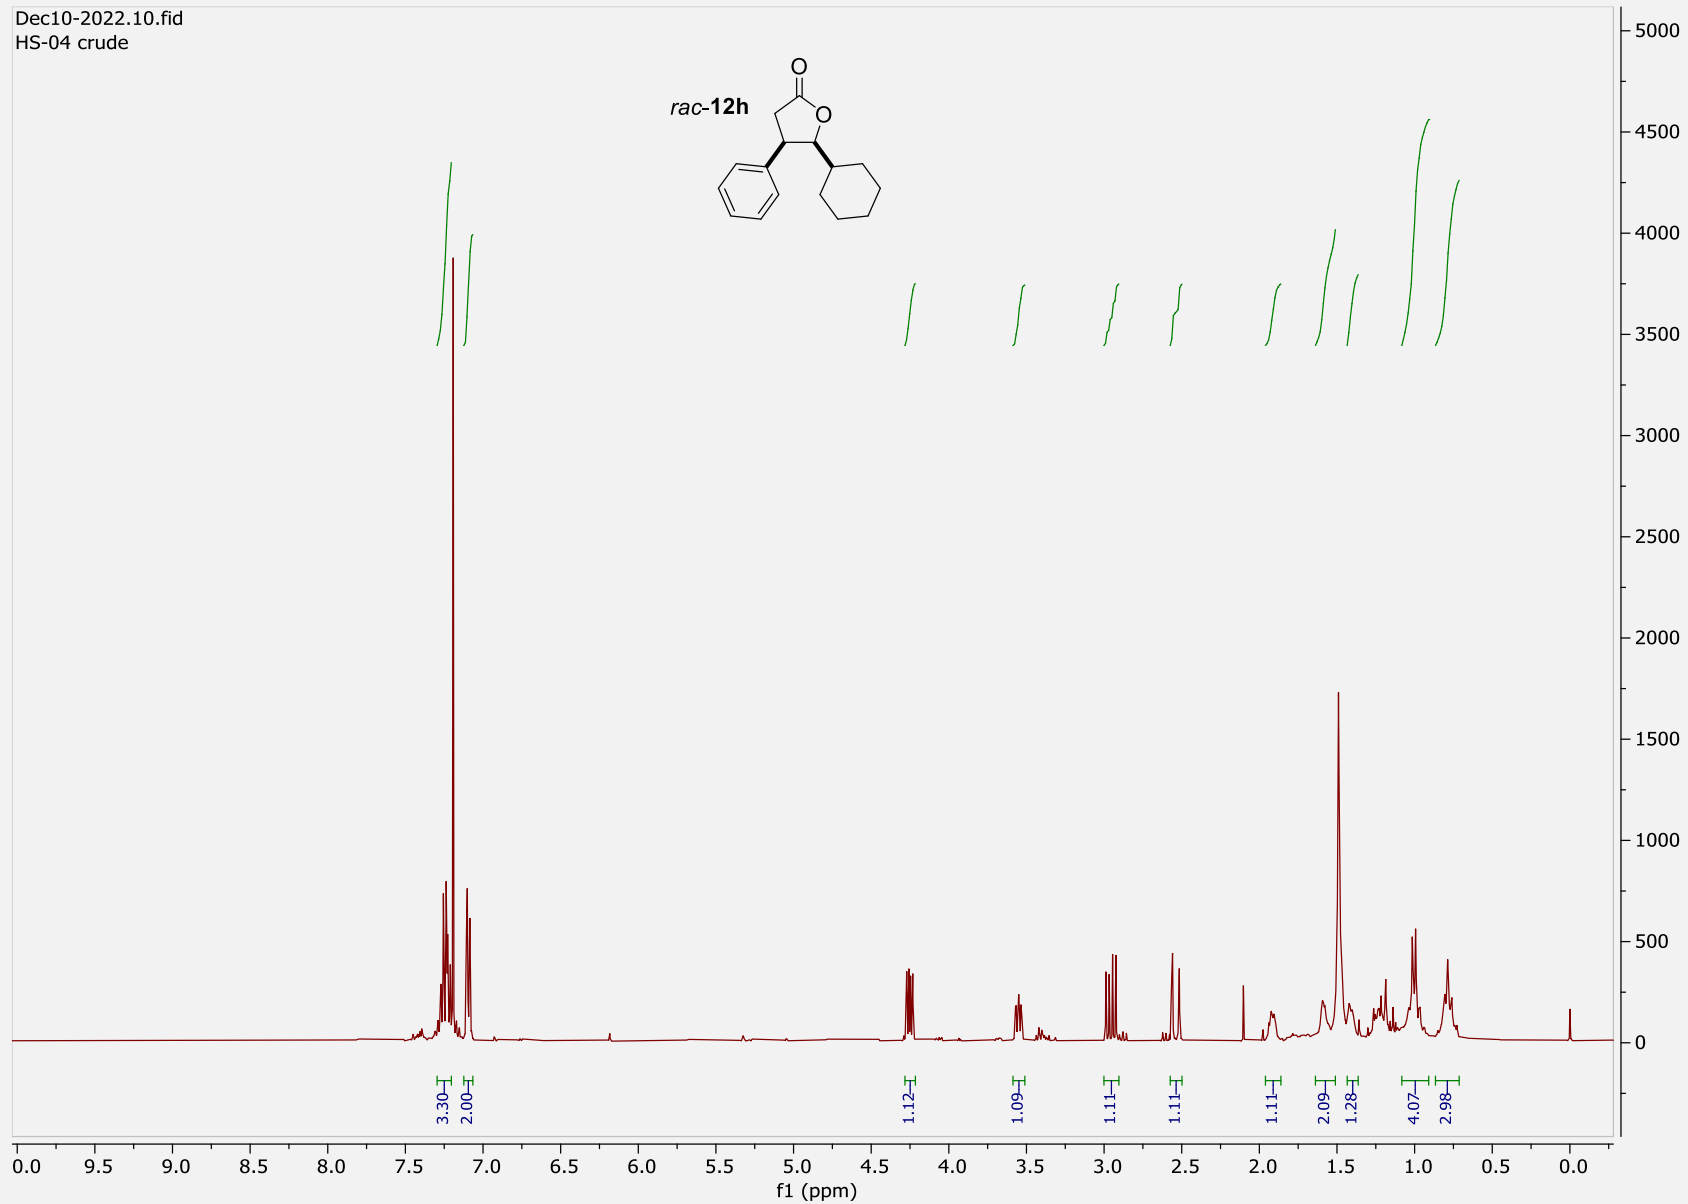

S113

Exp. 81.10.fid  
user Oluwarotimi Ojo  
PROTON.GLA CDCl3 /u oluojo 53

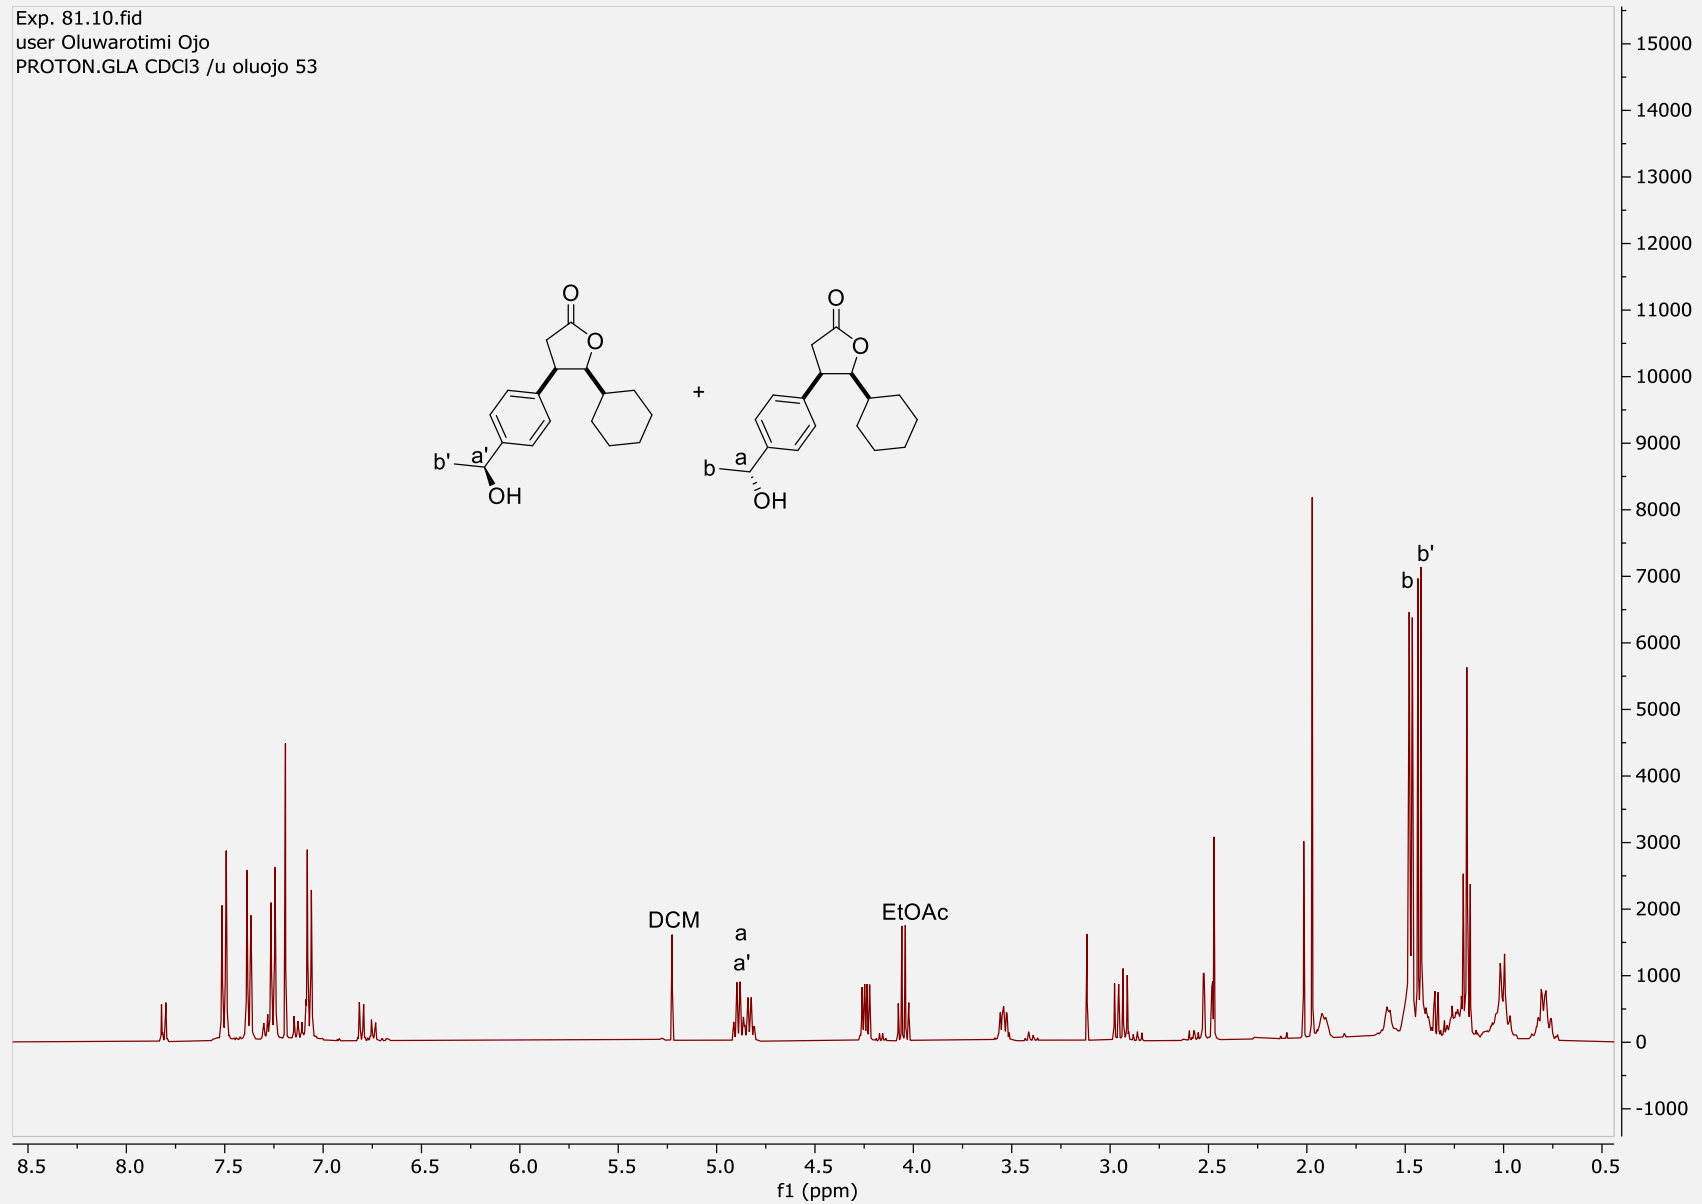

S114

**$^1\text{H}$  and  $^{13}\text{C}$**   
**NMR Spectra**  
of  
**Purified**  *$\gamma$ -Butyrolactones*

HS-01\_Me\_Major.10.fid  
user Oluwarotimi Ojo  
PROTON.GLA CDCl3 /u oluajo 20

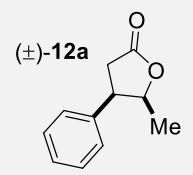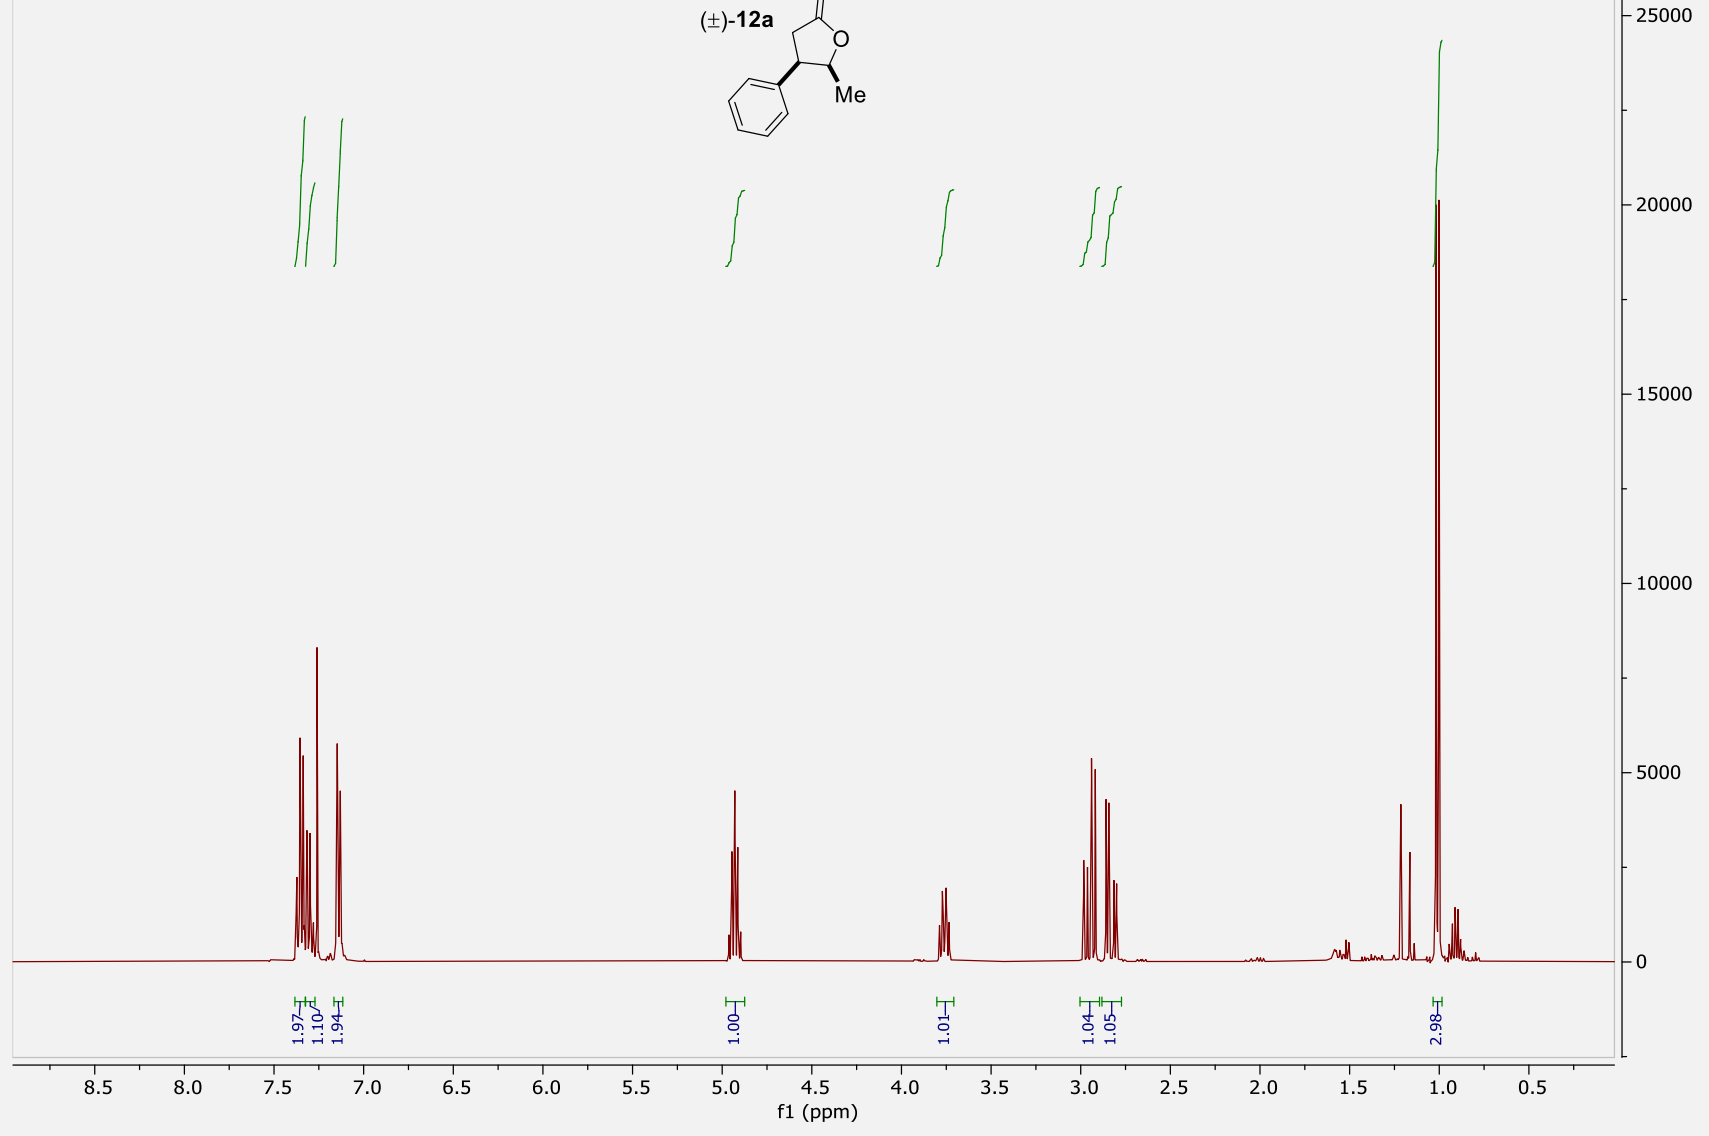

S116

HS-01\_Me\_Major.11.fid  
user Oluwarotimi Ojo  
C13CPD256.GLA CDCl3 /u oluajo 20

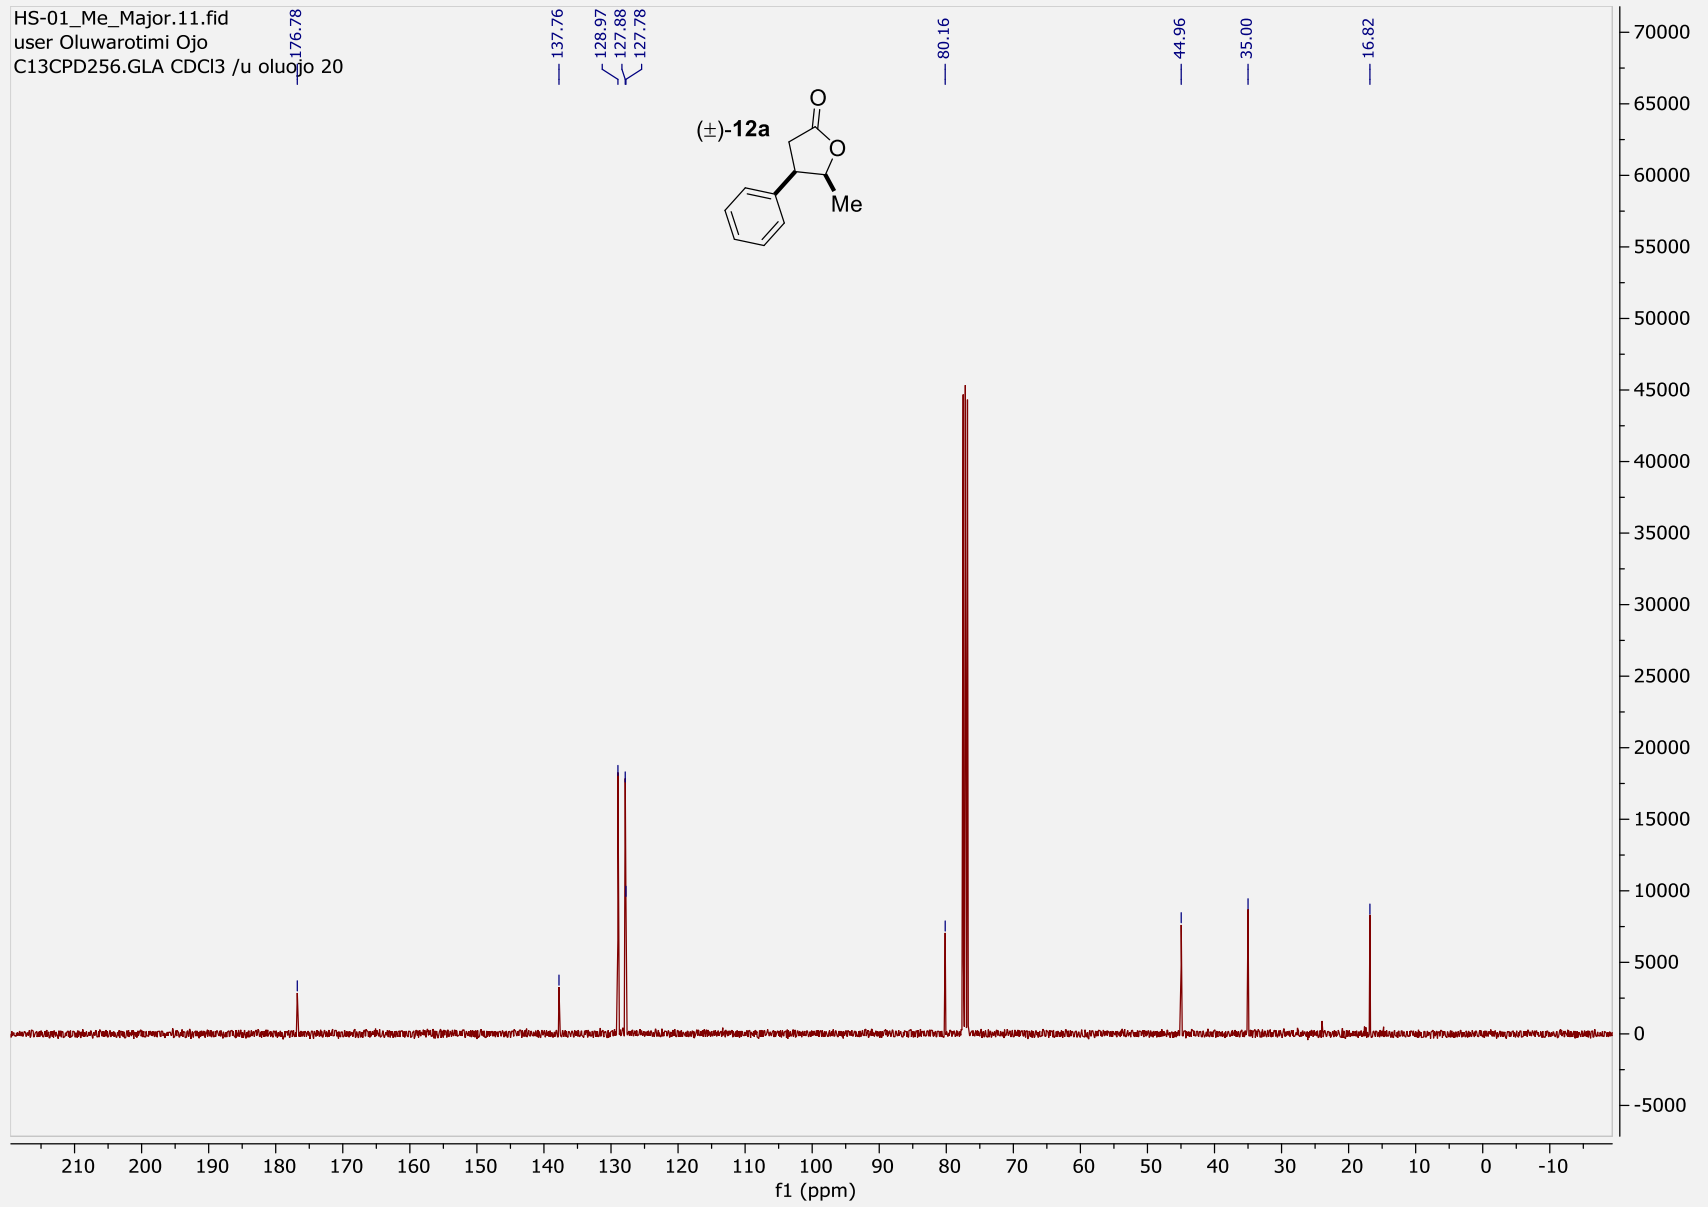

HS-16\_Et\_Major.10.fid  
user Oluwarotimi Ojo  
PROTON.GLA CDCl3 /u oluojo 21

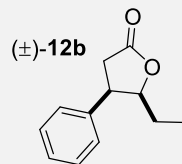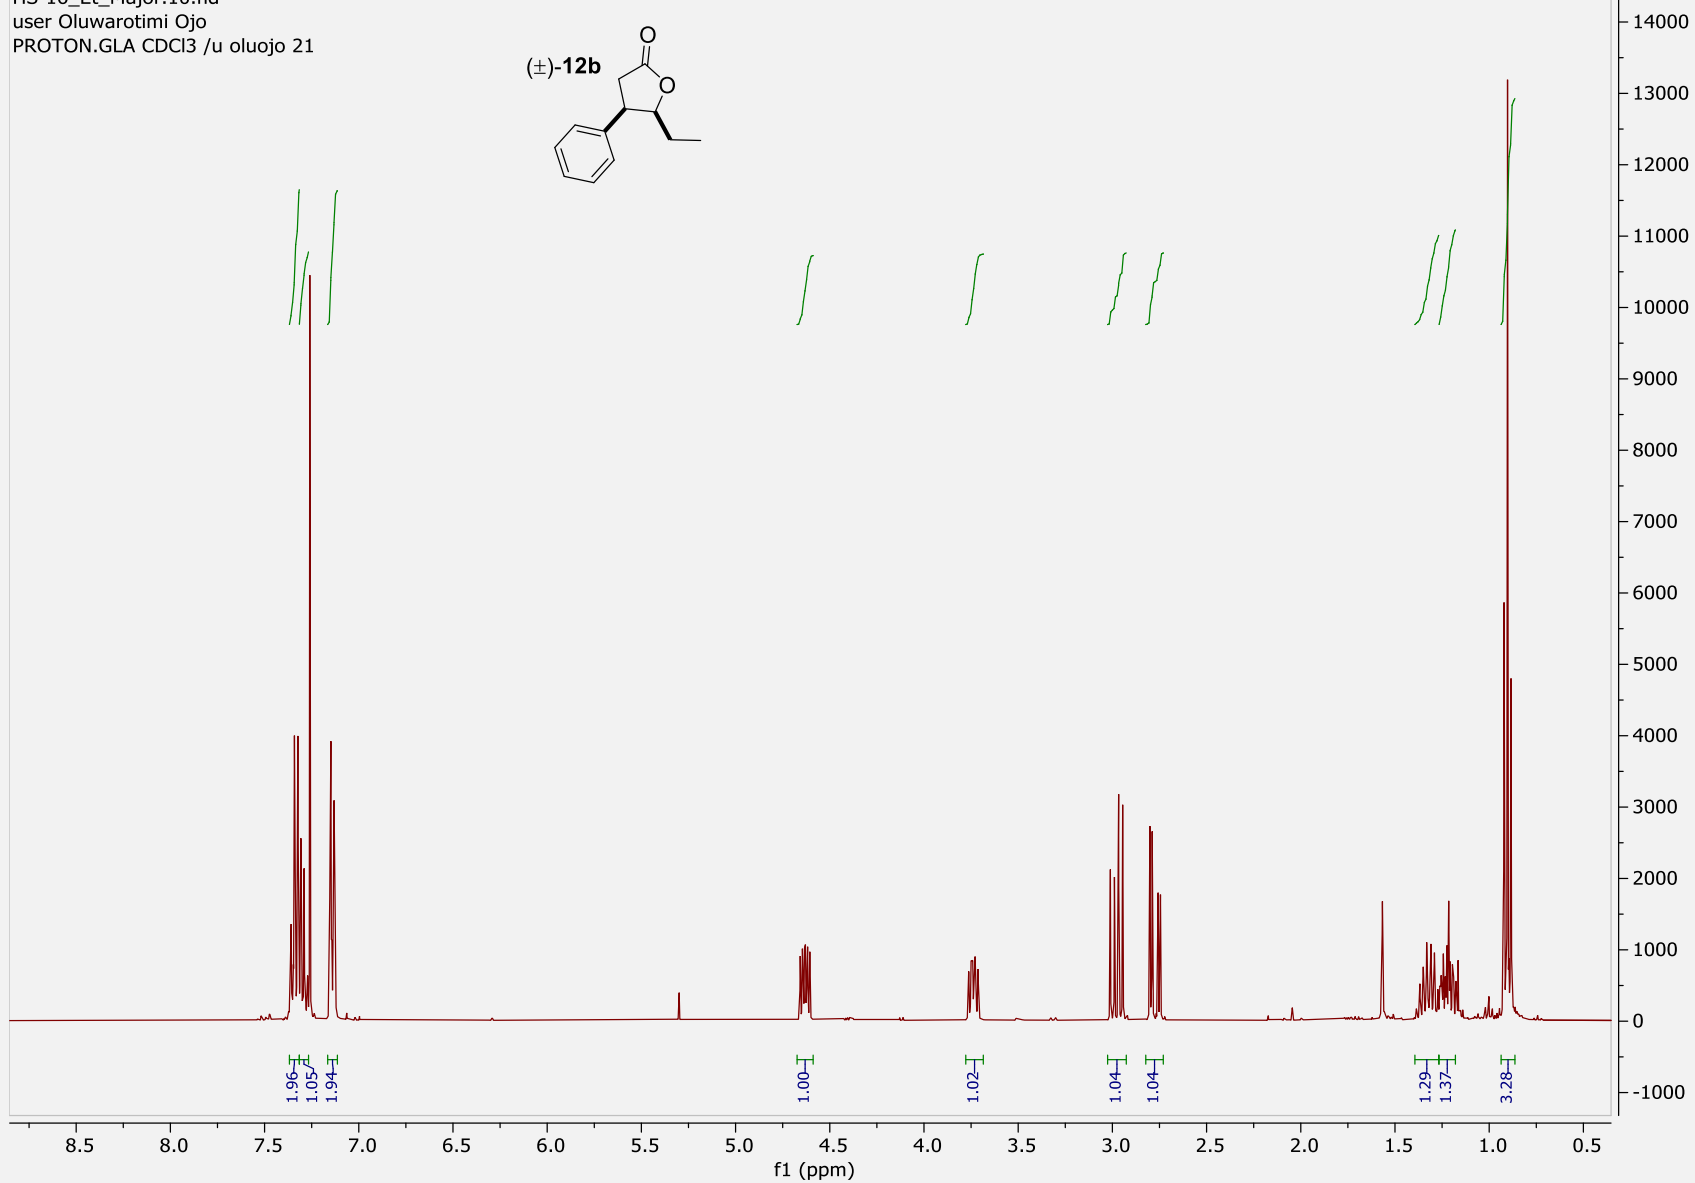

S118

HS-16\_Et\_Major.11.fid  
user Oluwarotimi Ojo  
C13CPD256.GLA CDCl3 /u oluajo 21

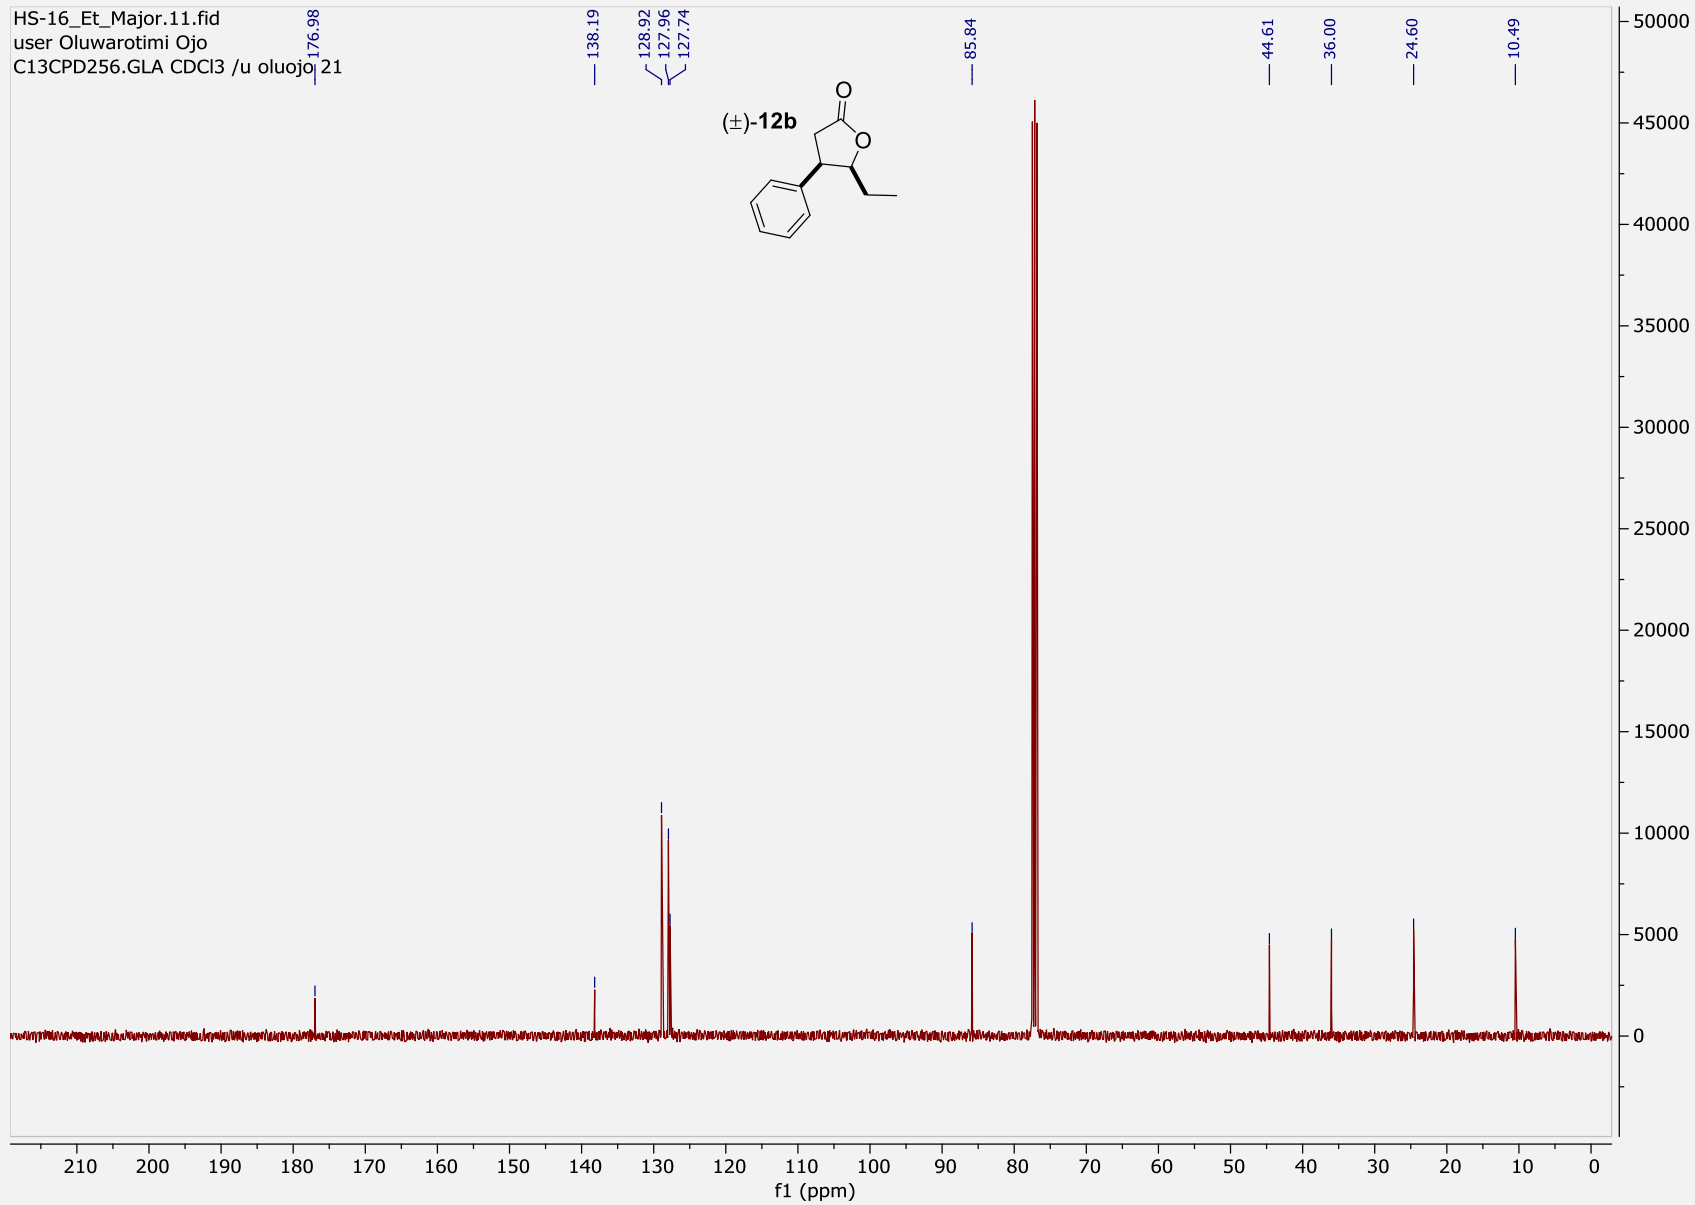

S119

Dec09-2022.10.fid  
HS-03 crude

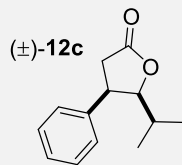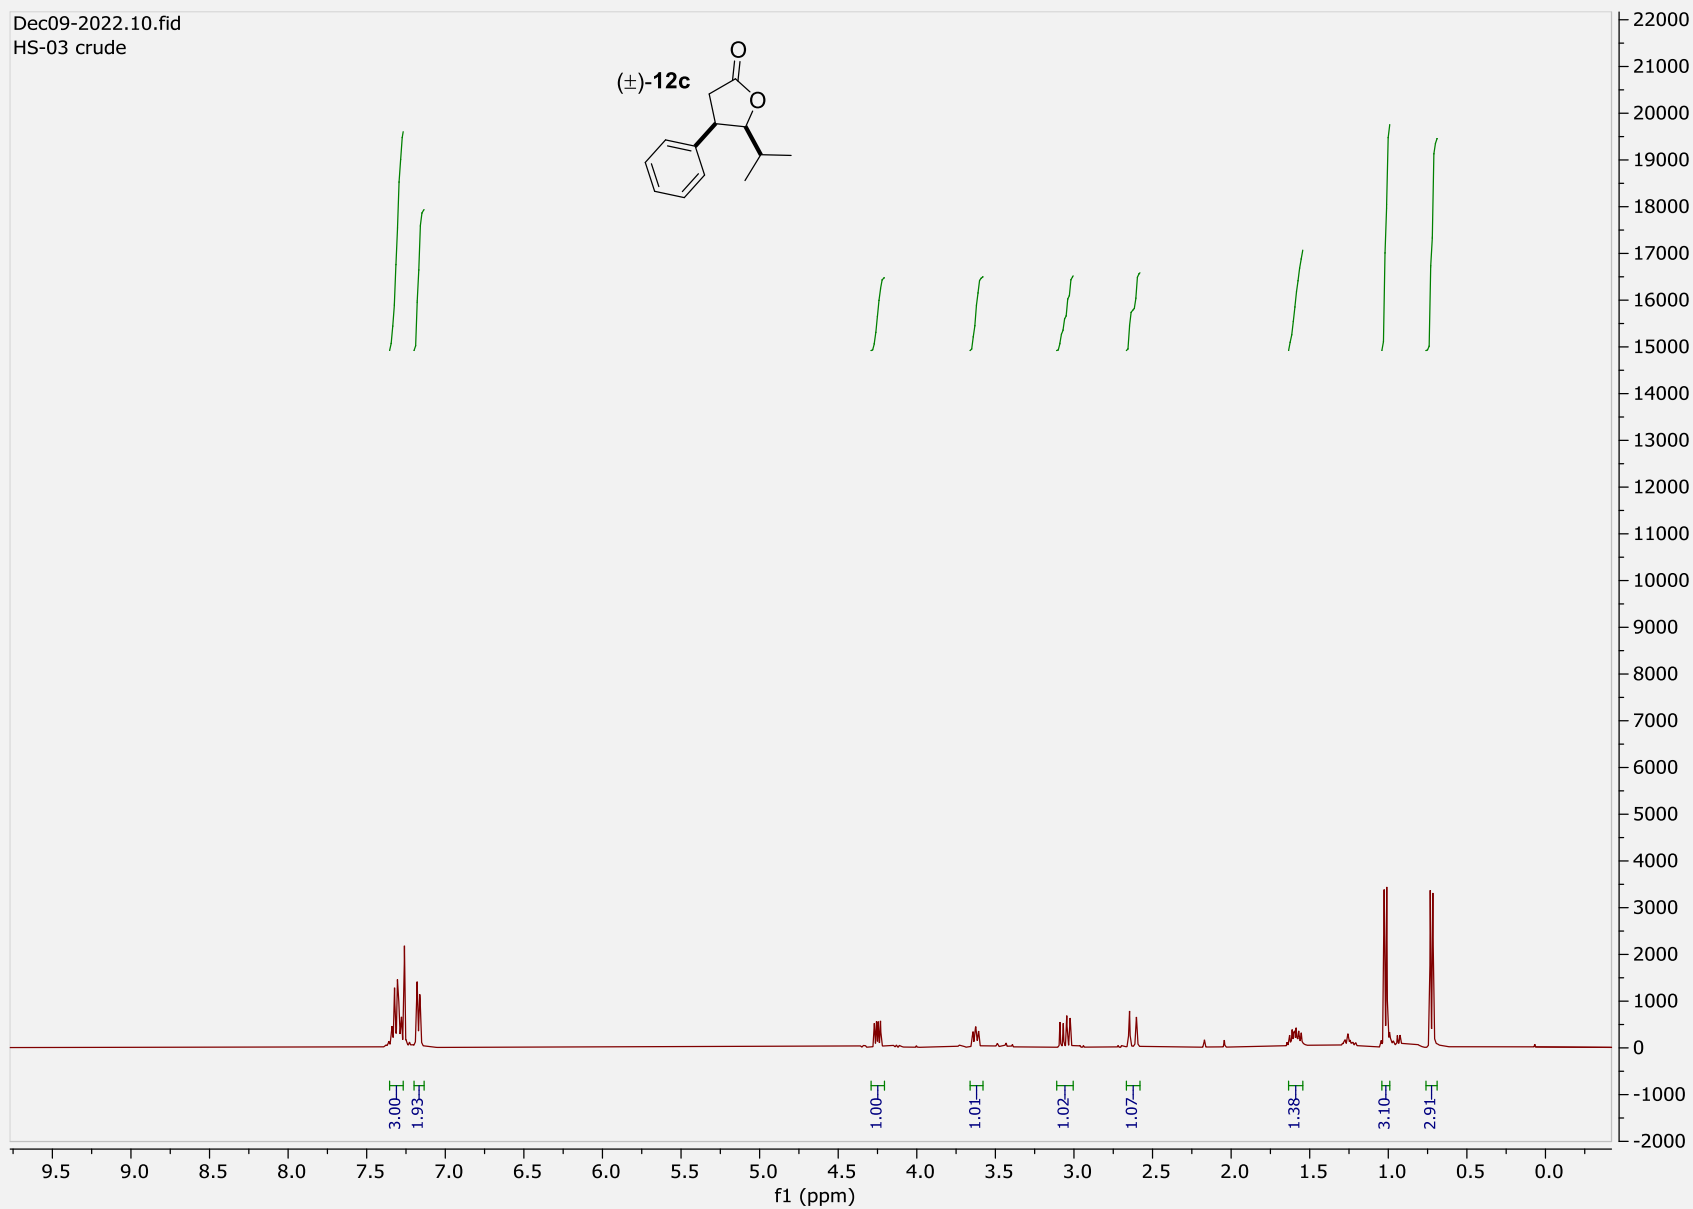

S120



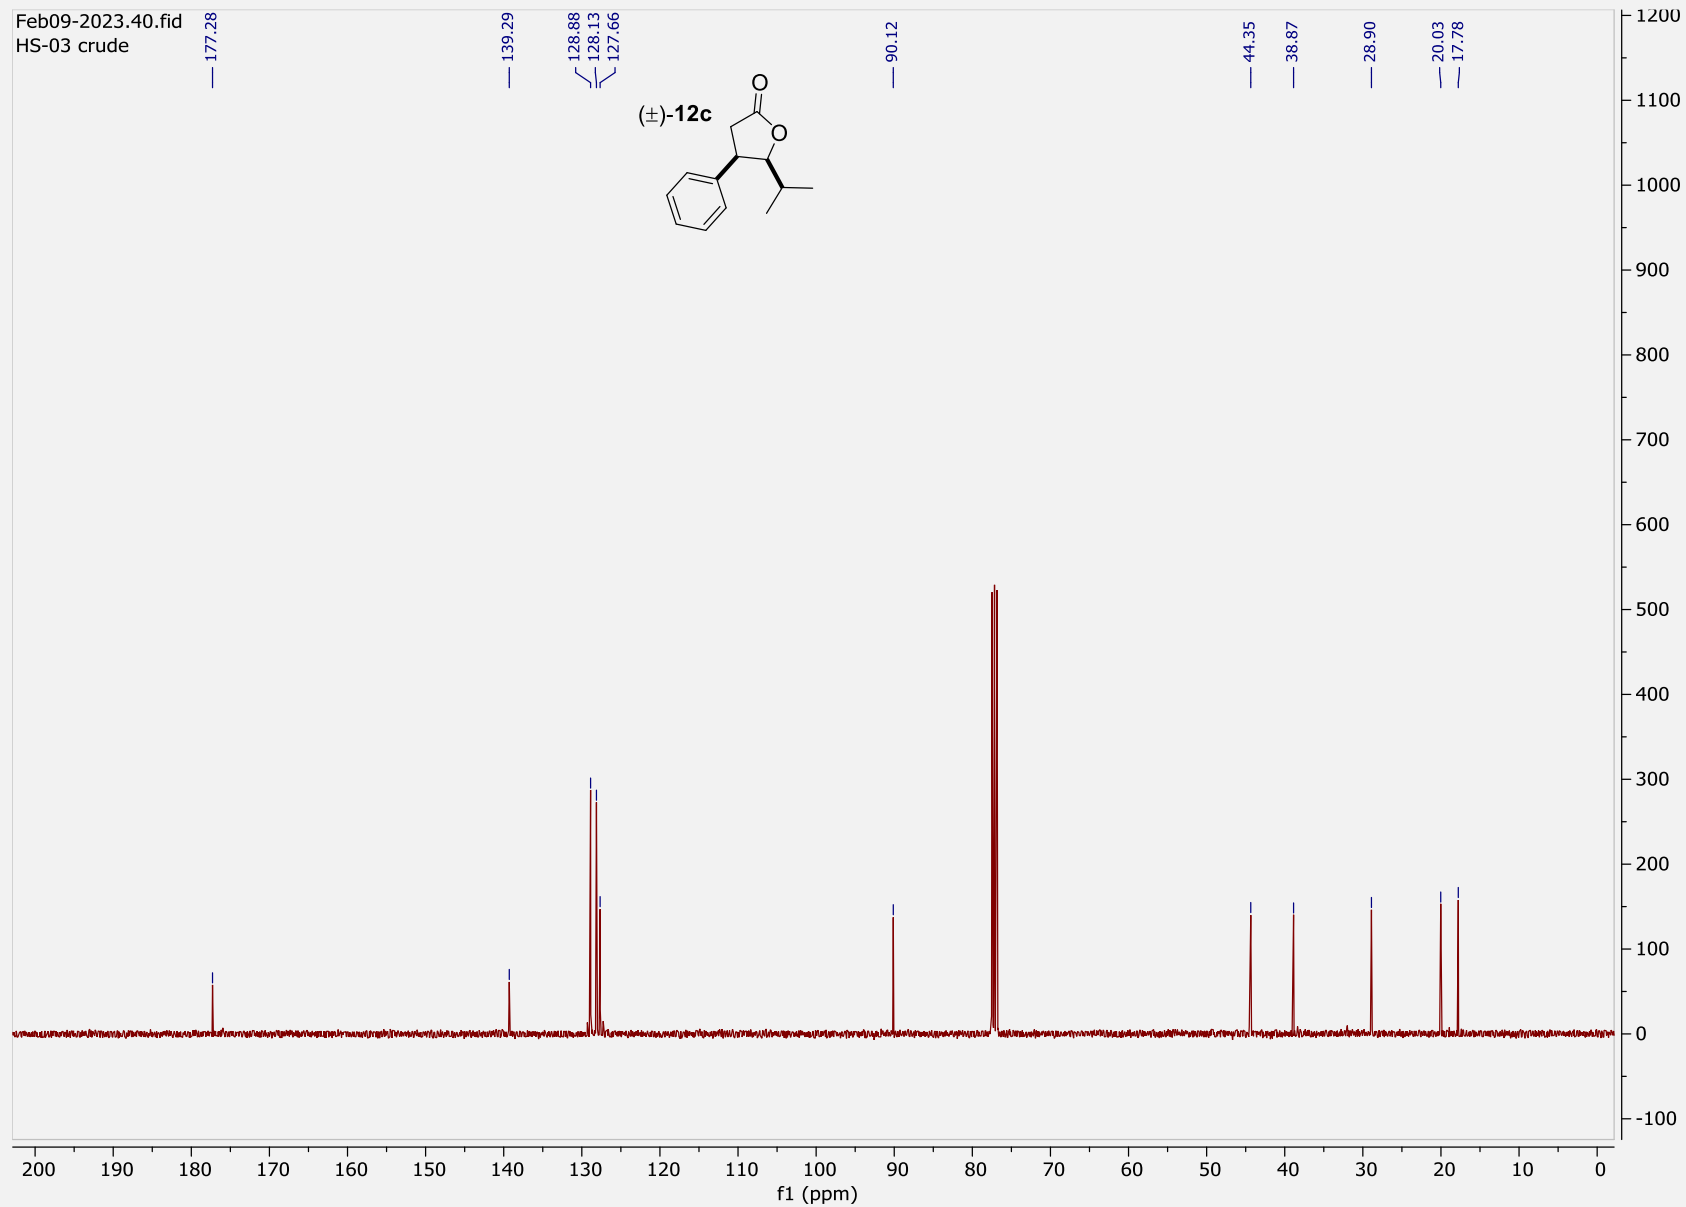

S121

HS-13\_C5H11\_Major.10.fid  
user Oluwarotimi Ojo  
PROTON.GLA CDCl3 /u oluajo 22

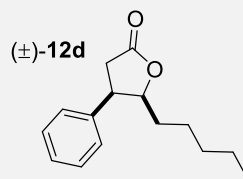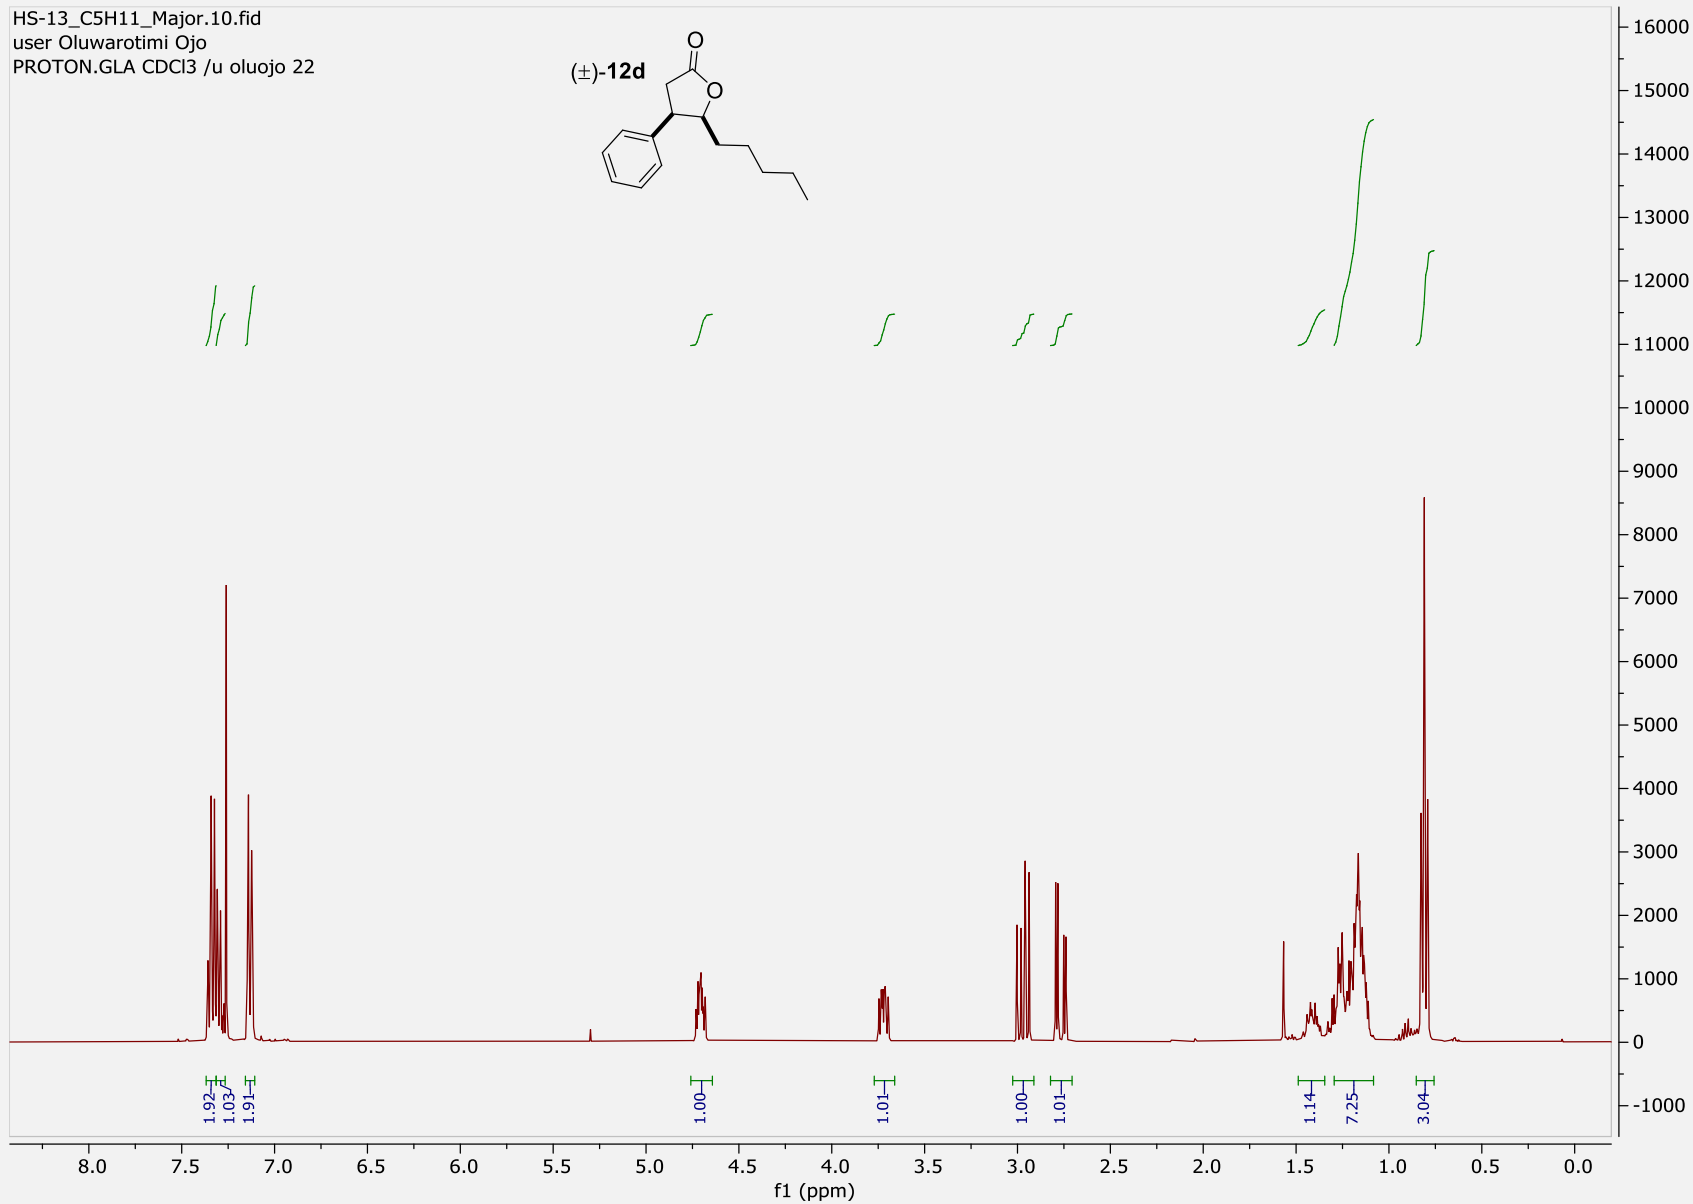

S122

HS-13\_C5H11\_Major.11.fid  
user Oluwarotimi Ojo  
C13CPD256.GLA CDCl3 /u ojuo 22

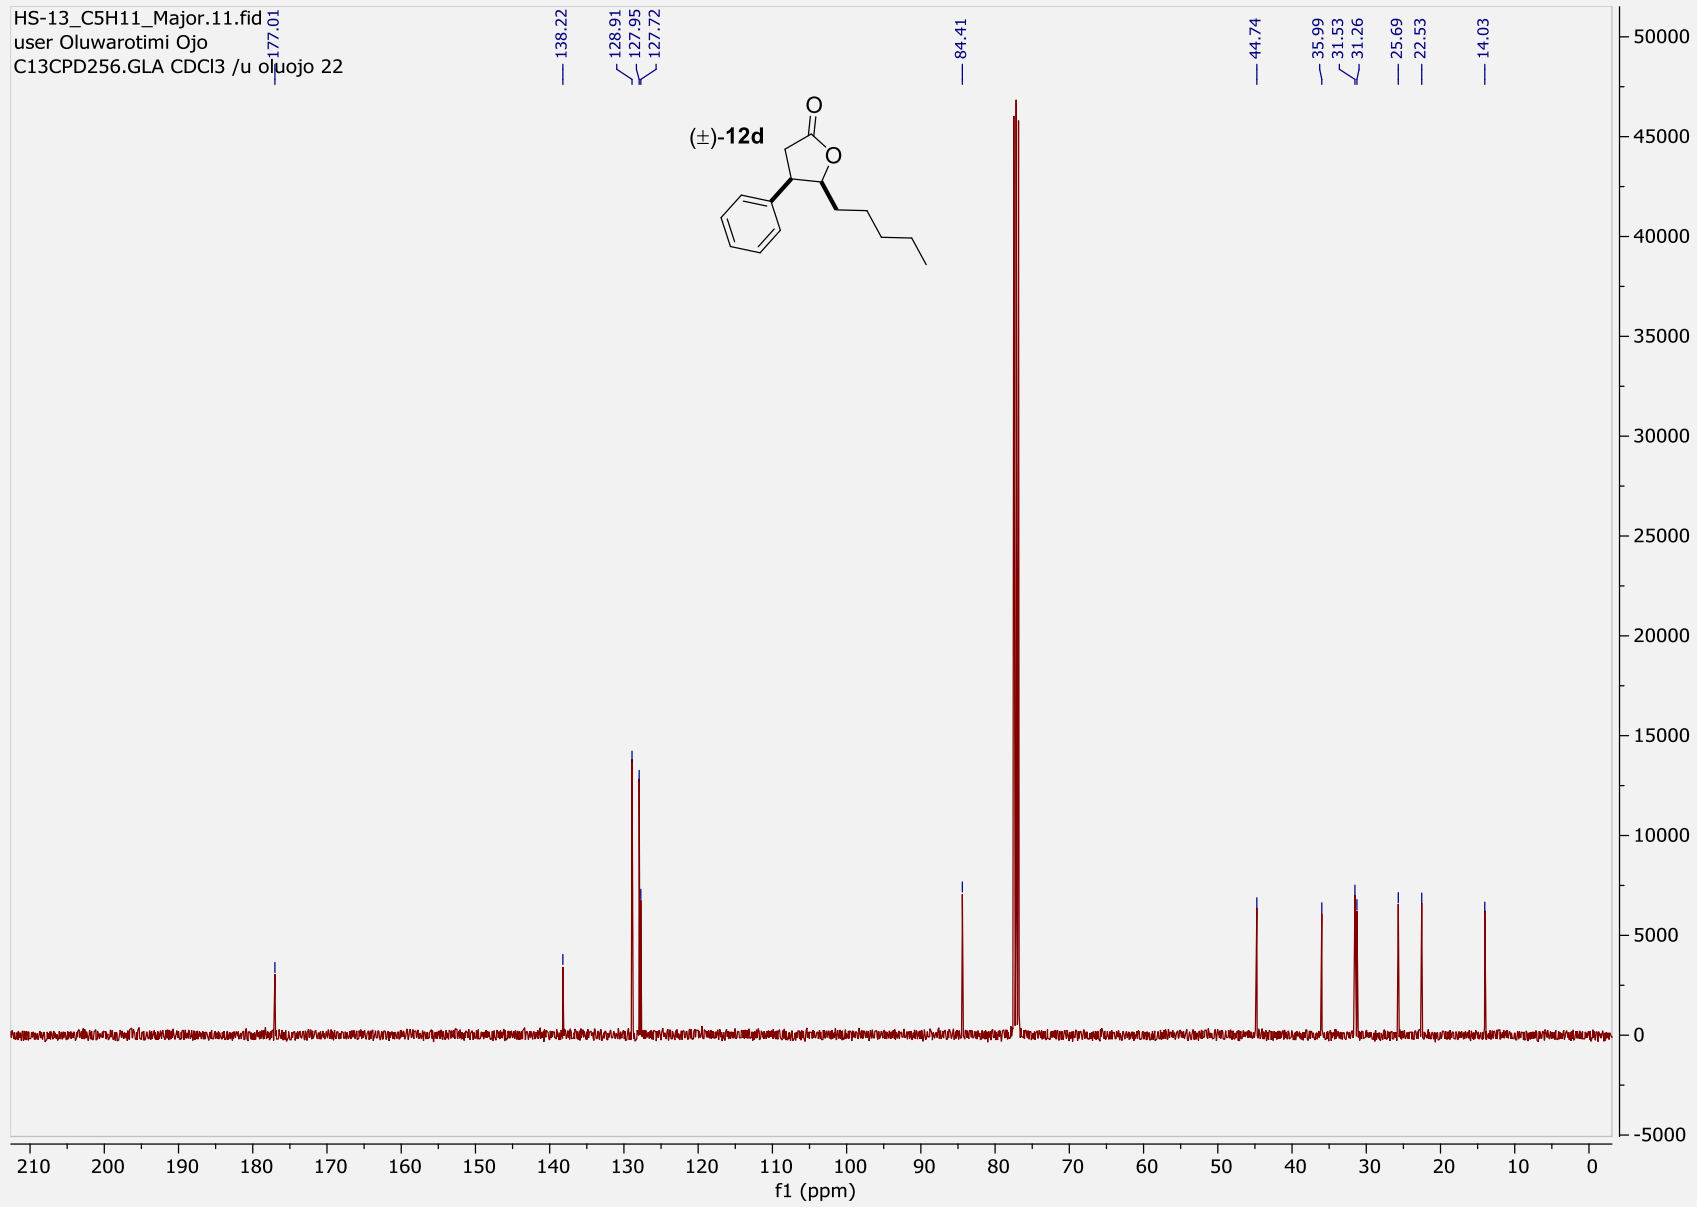

S123

Exp. 41\_Cyclopropyl\_Major.10.fid  
user Oluwarotimi Ojo  
PROTON.GLA CDCl3 /u oluajo 23

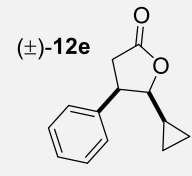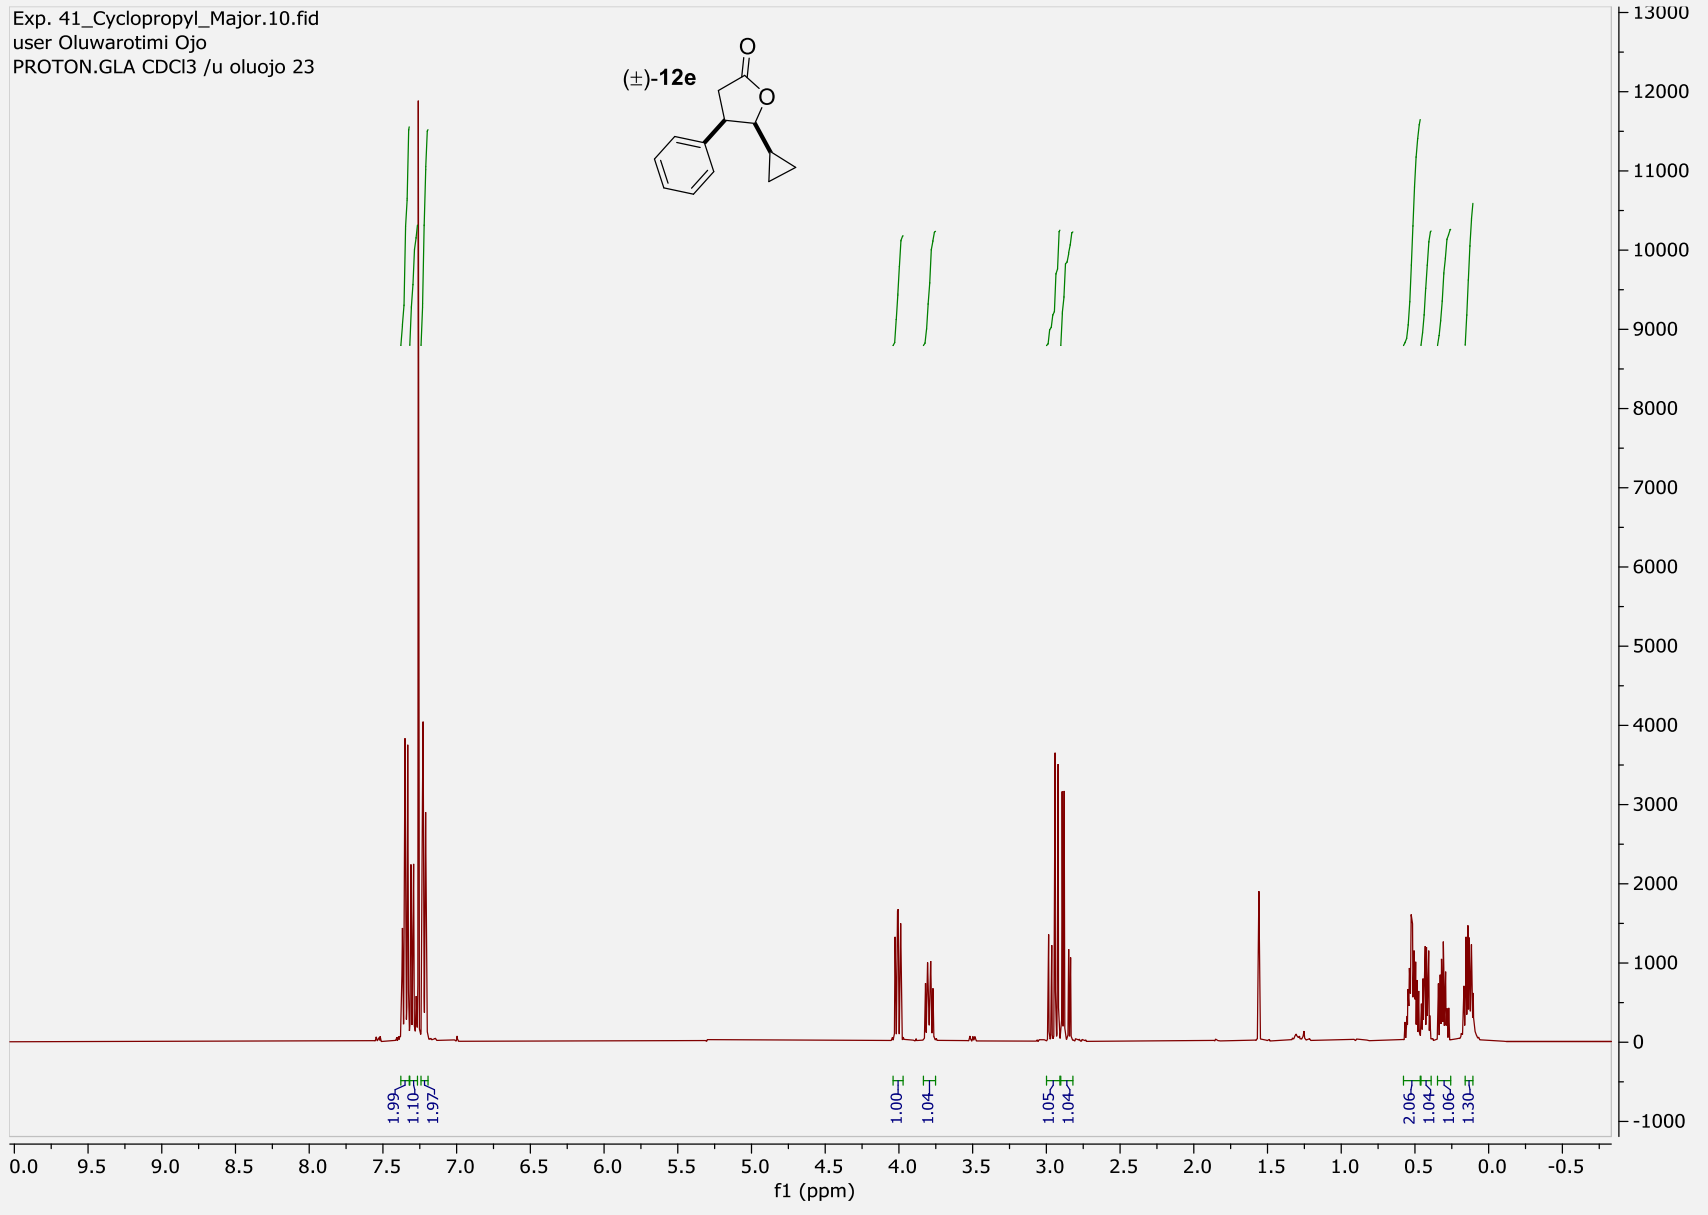

Exp. 41\_Cyclopropyl\_Major.31.fid  
user Oluwarotimi Ojo  
C13CPD256.GLA CDCl3 /u olojo 23

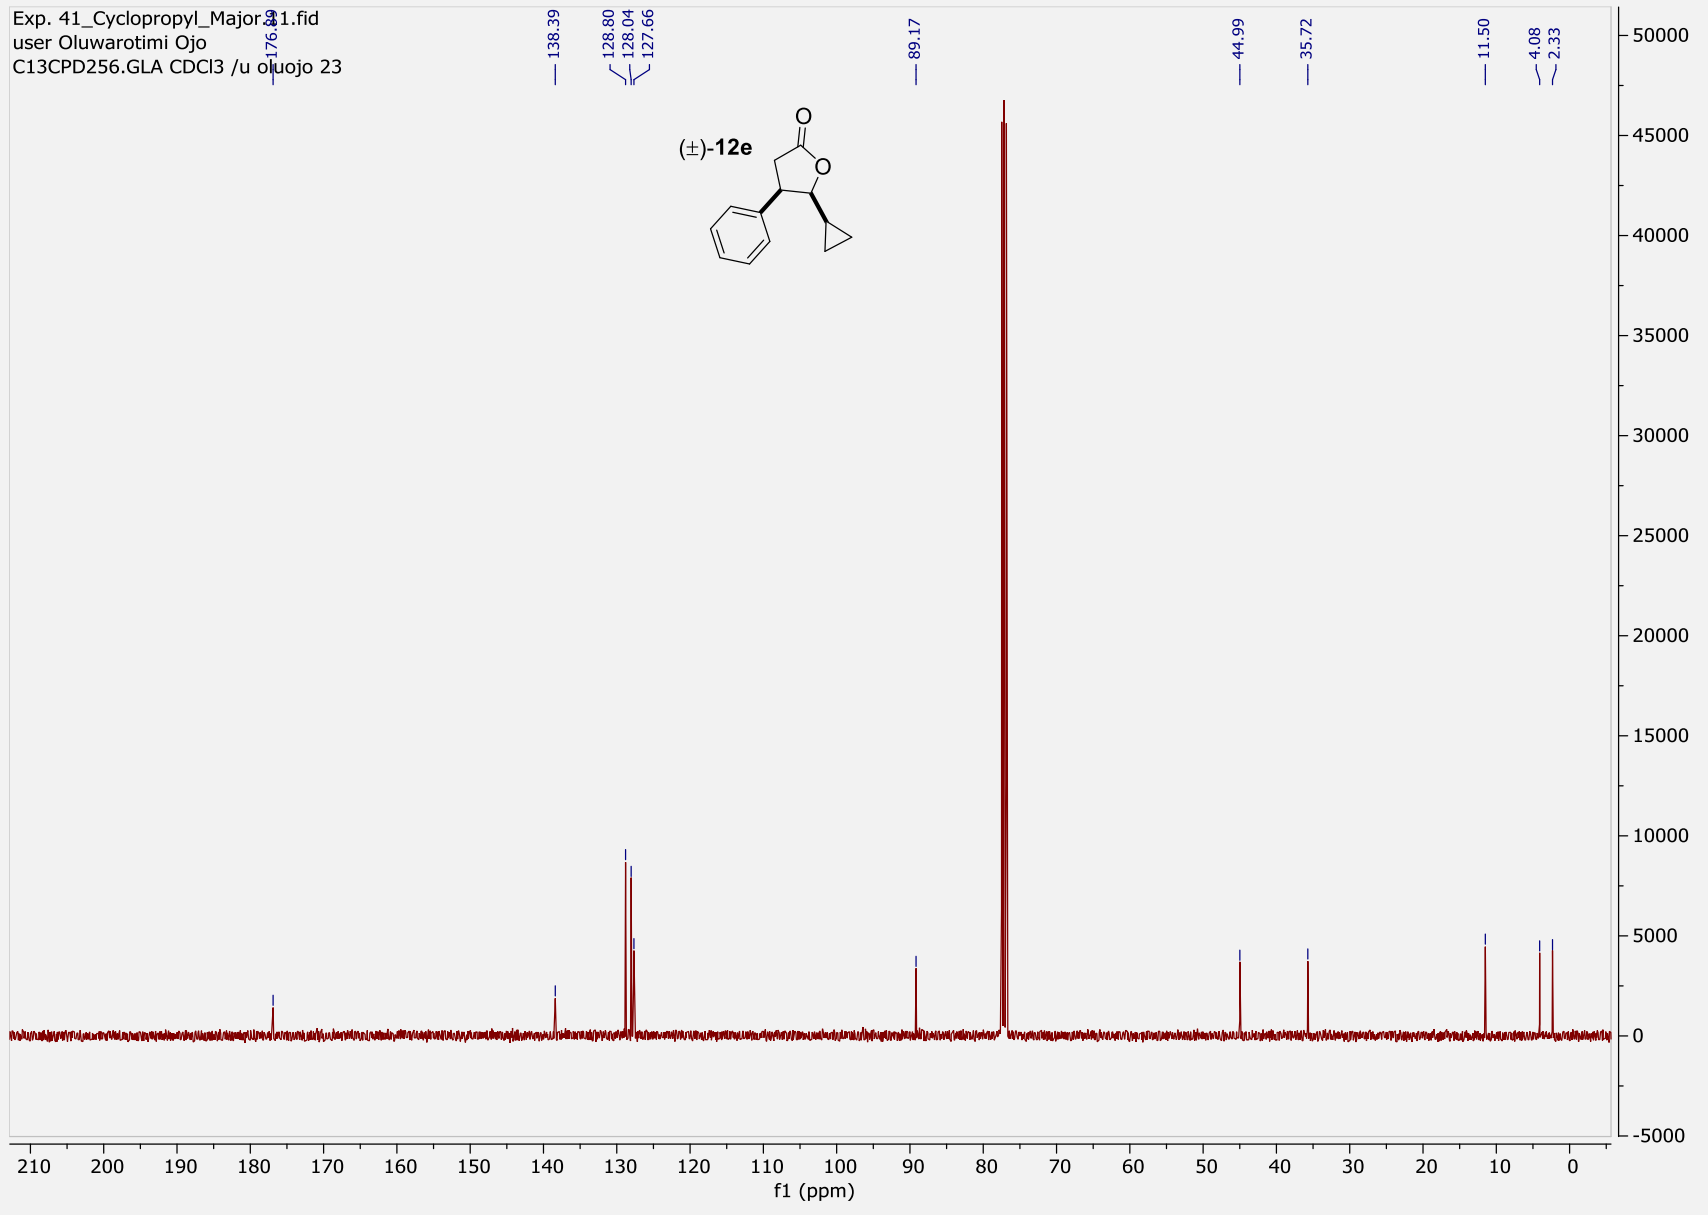

S125

Exp. 46.10.fid

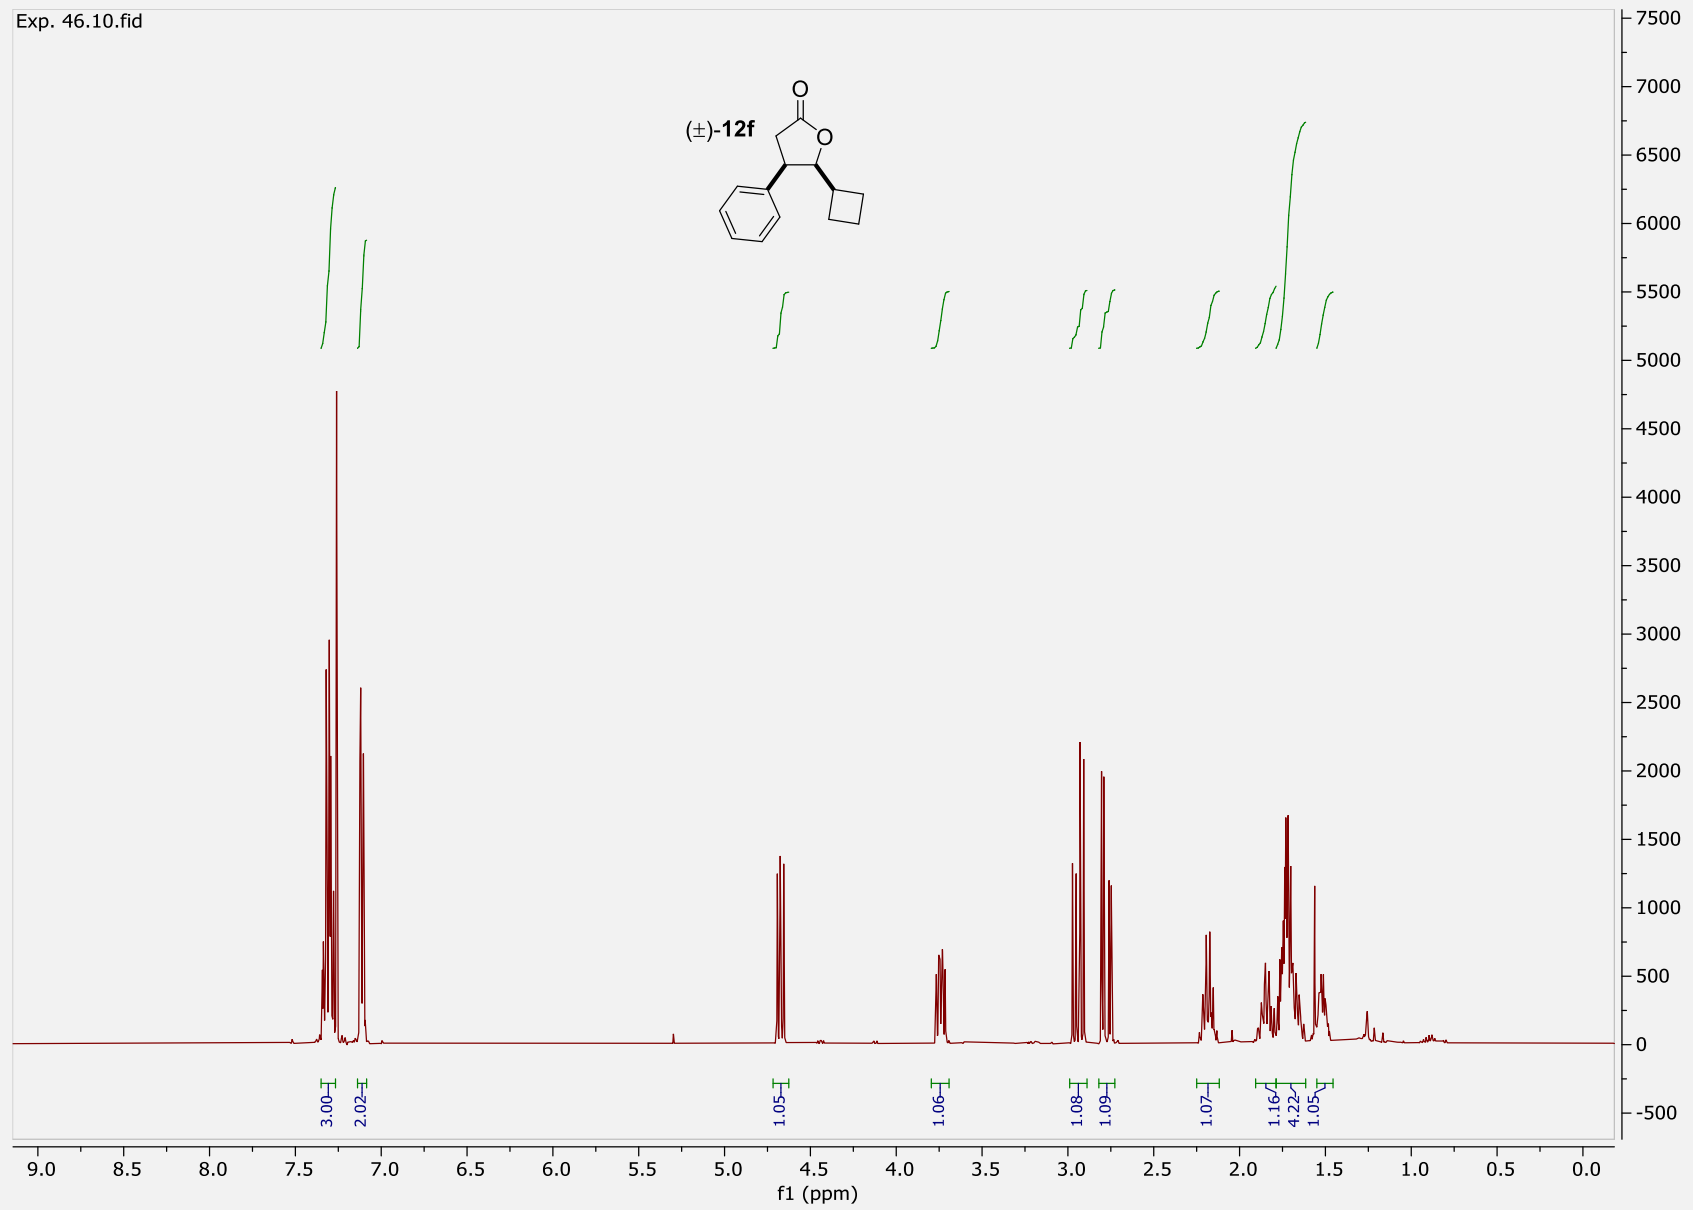

S126

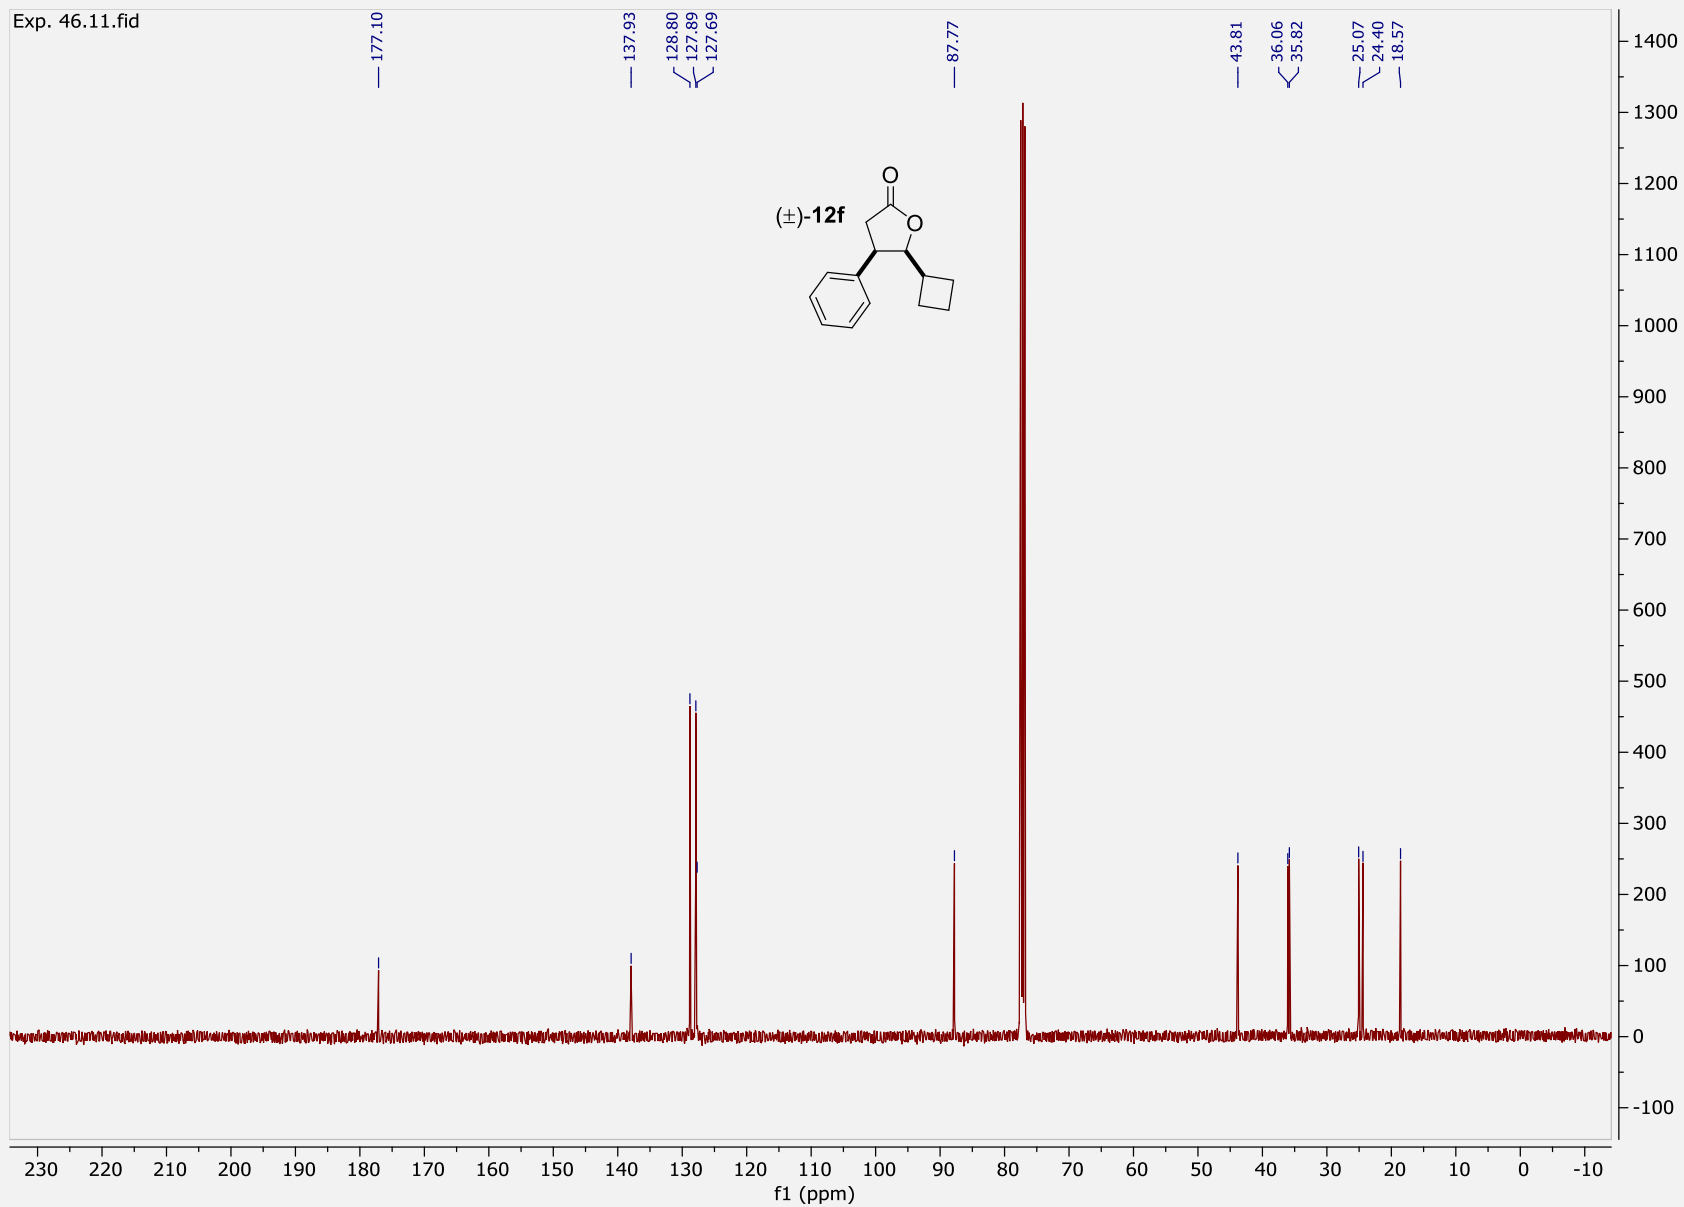

S127

12g.10.fid  
user Oluwarotimi Ojo  
PROTON.GLA CDCl3 /u oluajo 12

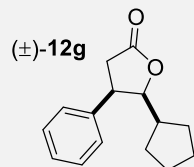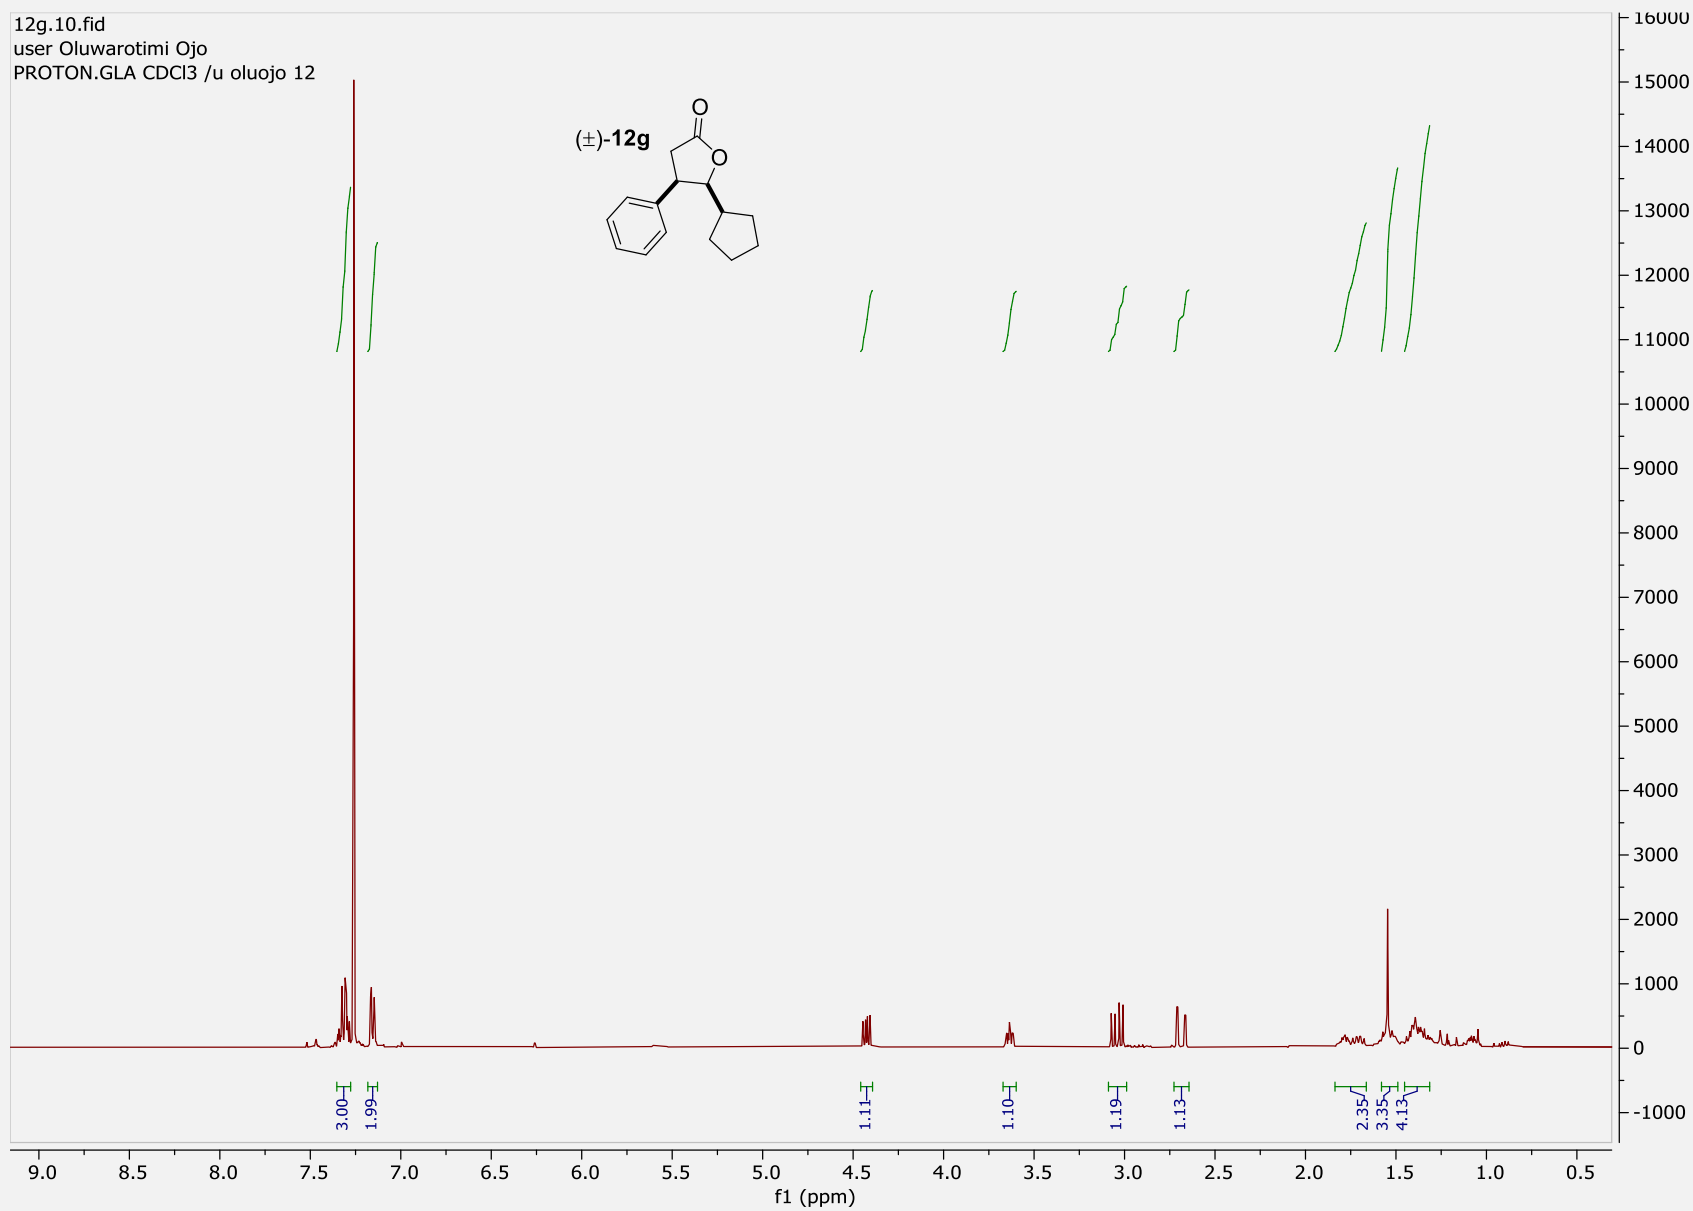

S128



Feb11-2023.11.fid  
Exp. 47 crude cyclopentane rac

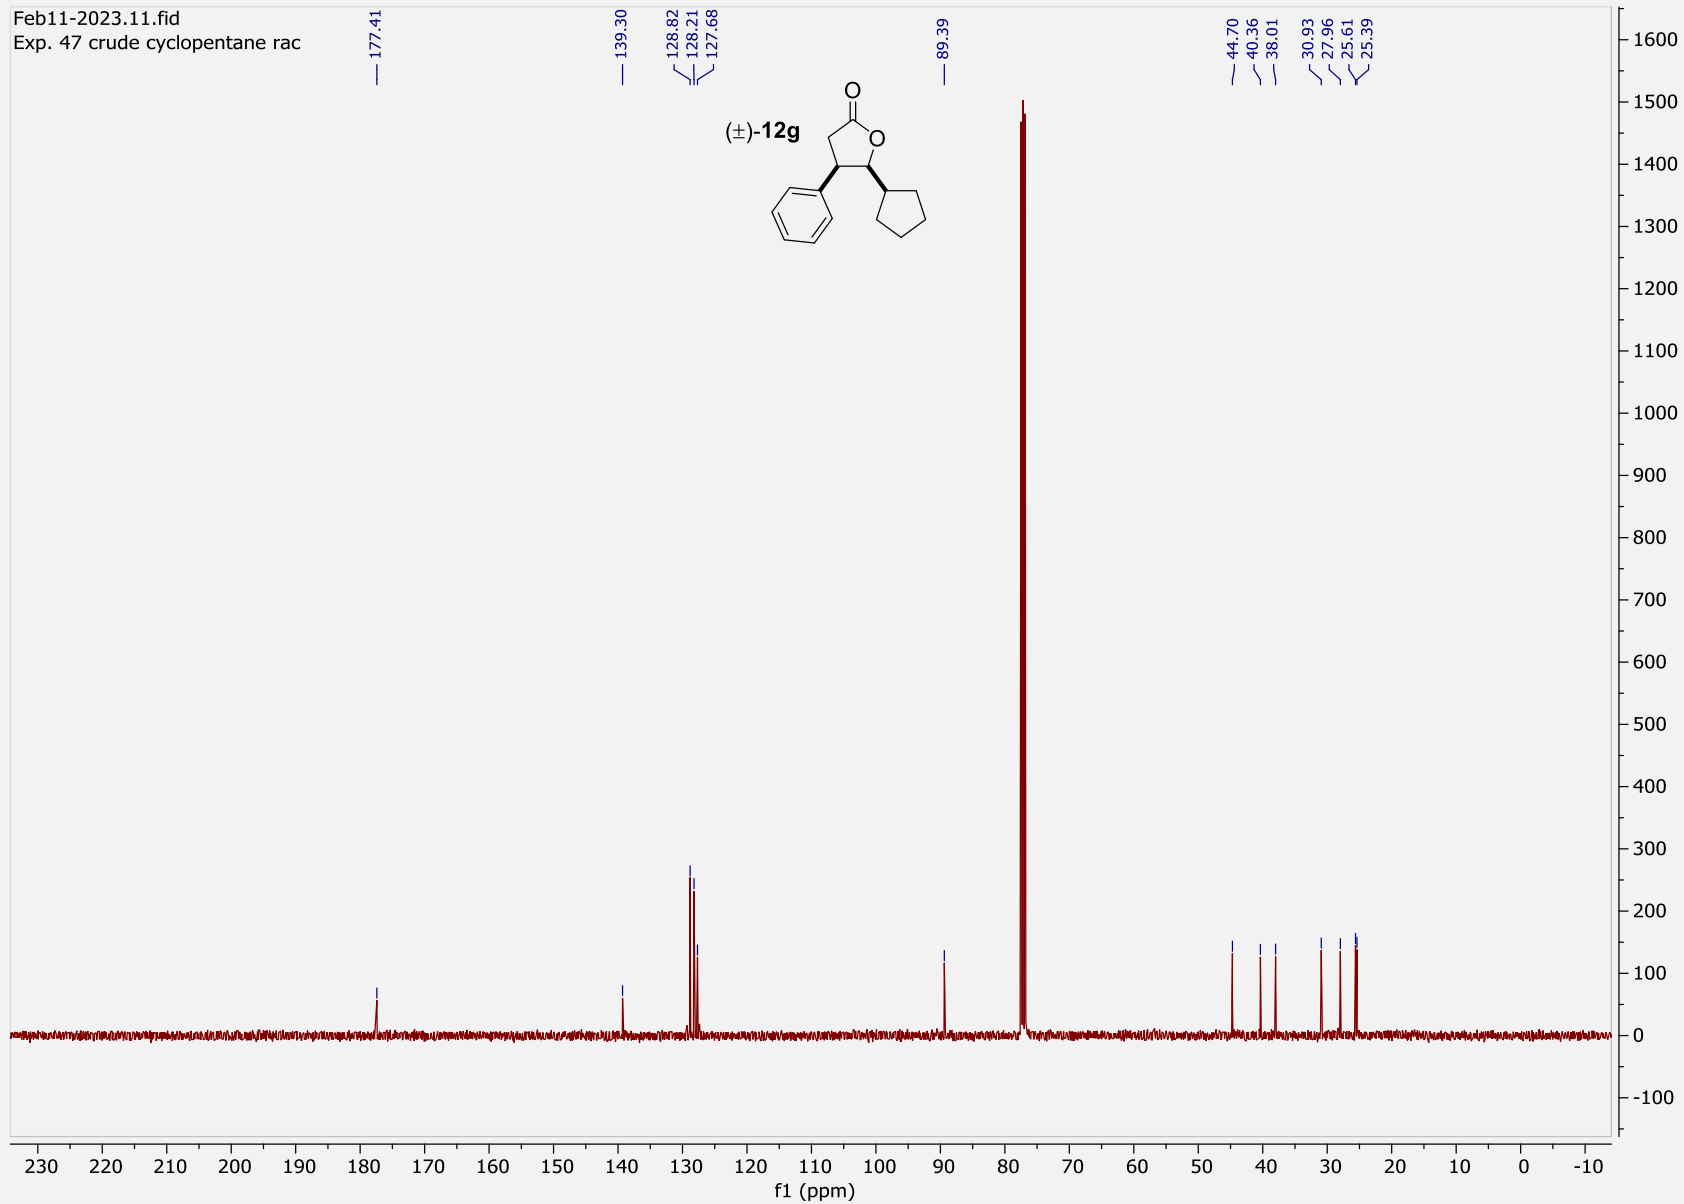

S129

12g.11.ser  
user Oluwarotimi Ojo  
NOESY2D.GLA CDCl3 /u oluajo 12

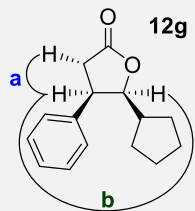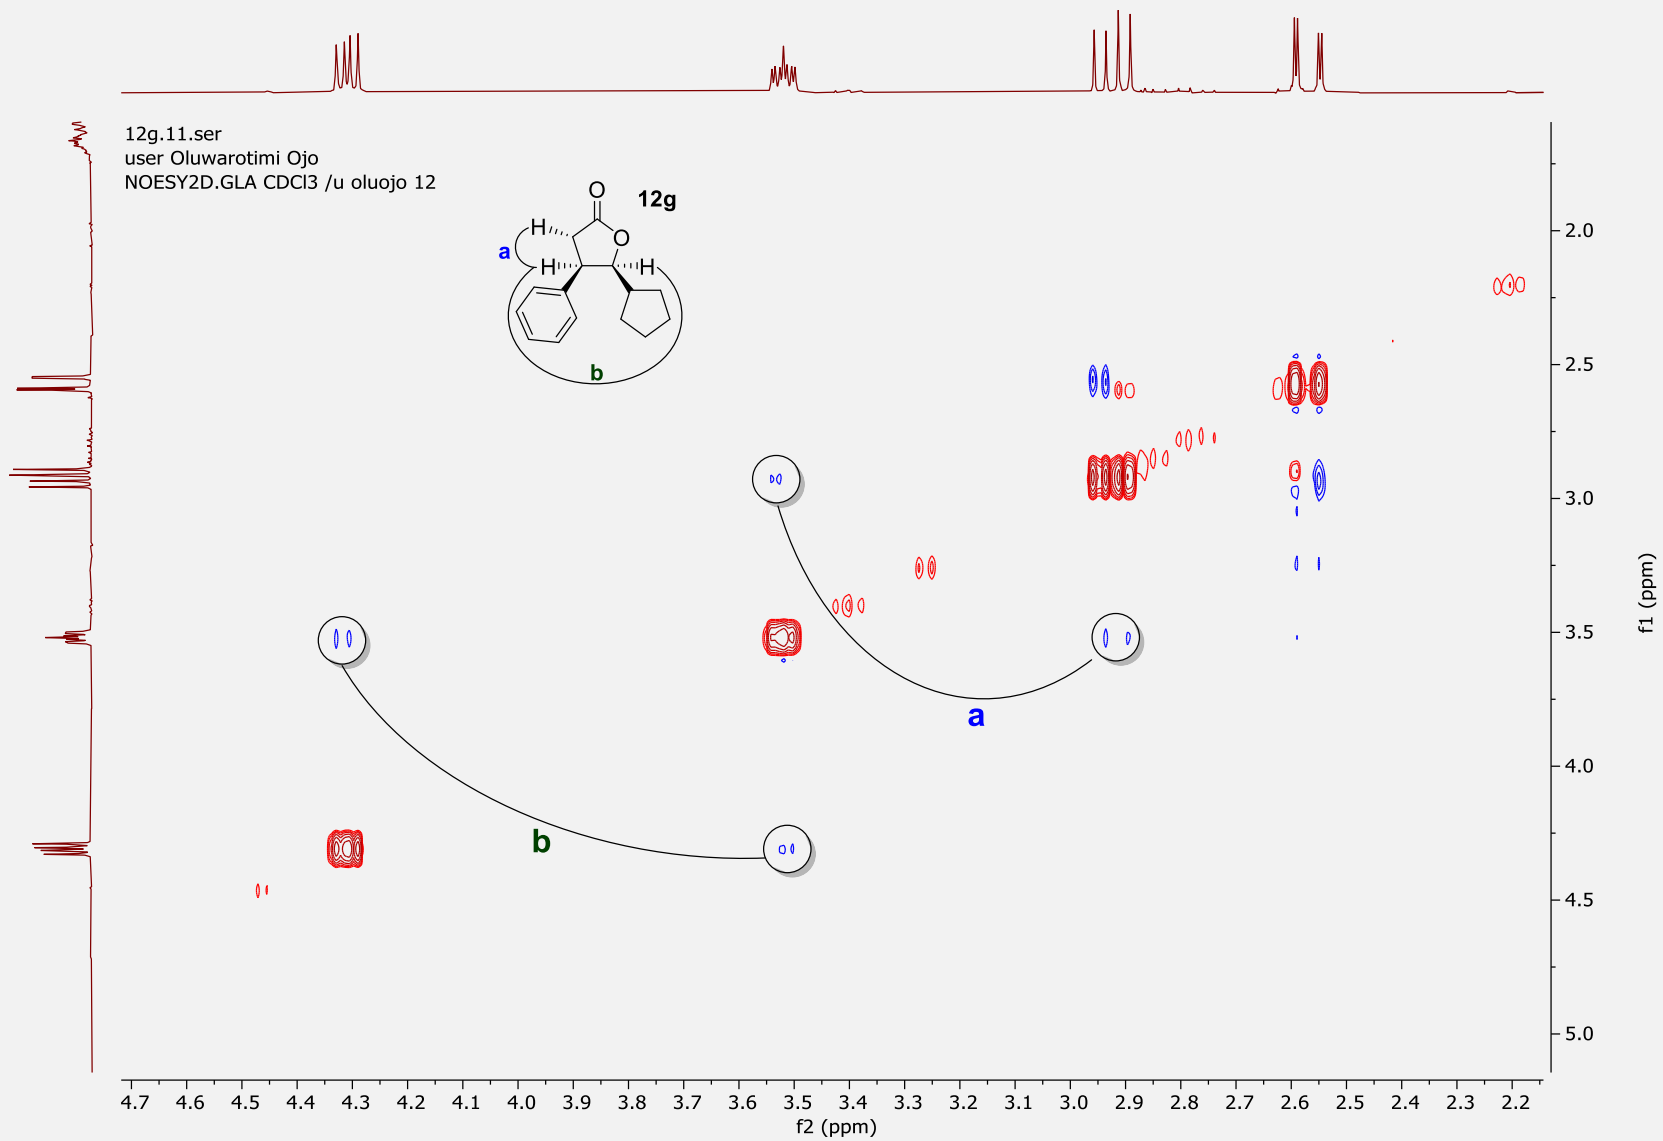

12h.10.fid  
user Oluwarotimi Ojo  
PROTON.GLA CDCl3 /u oluajo 13

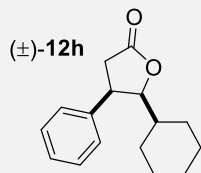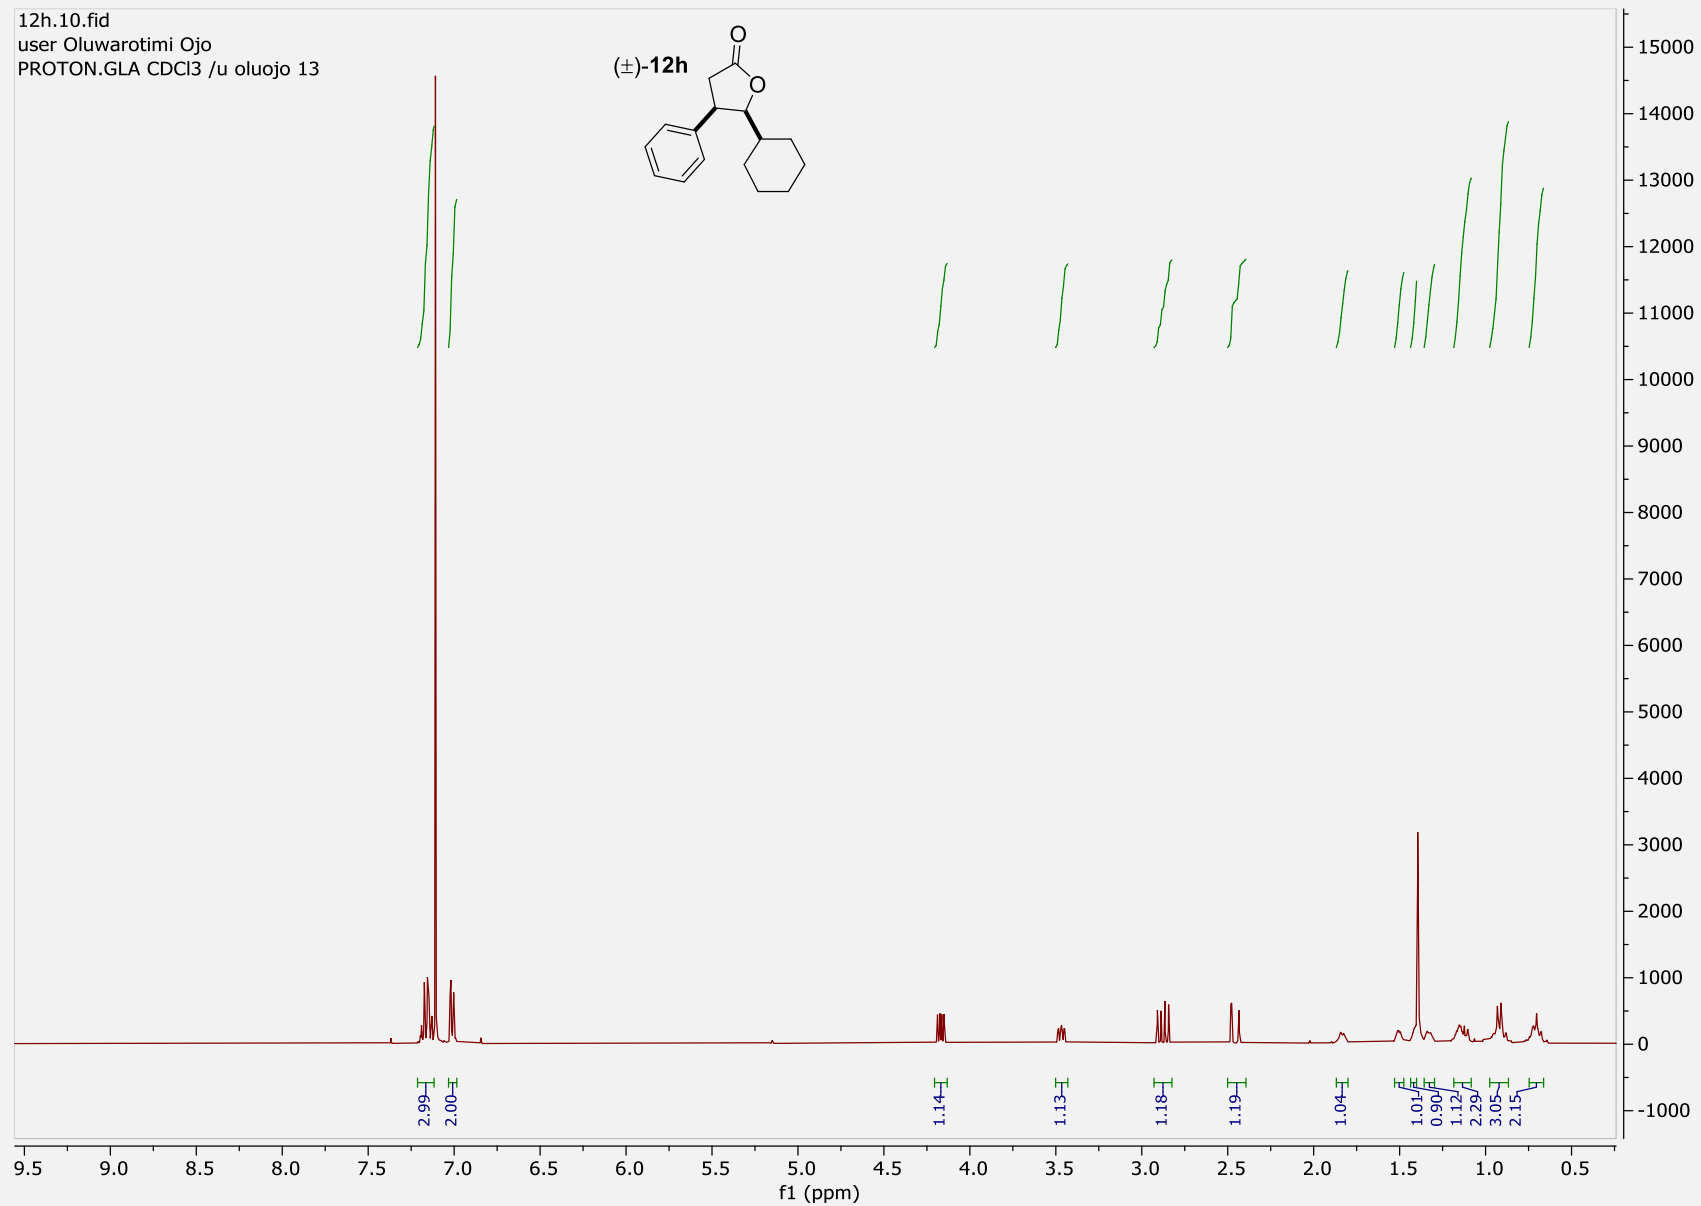

S131

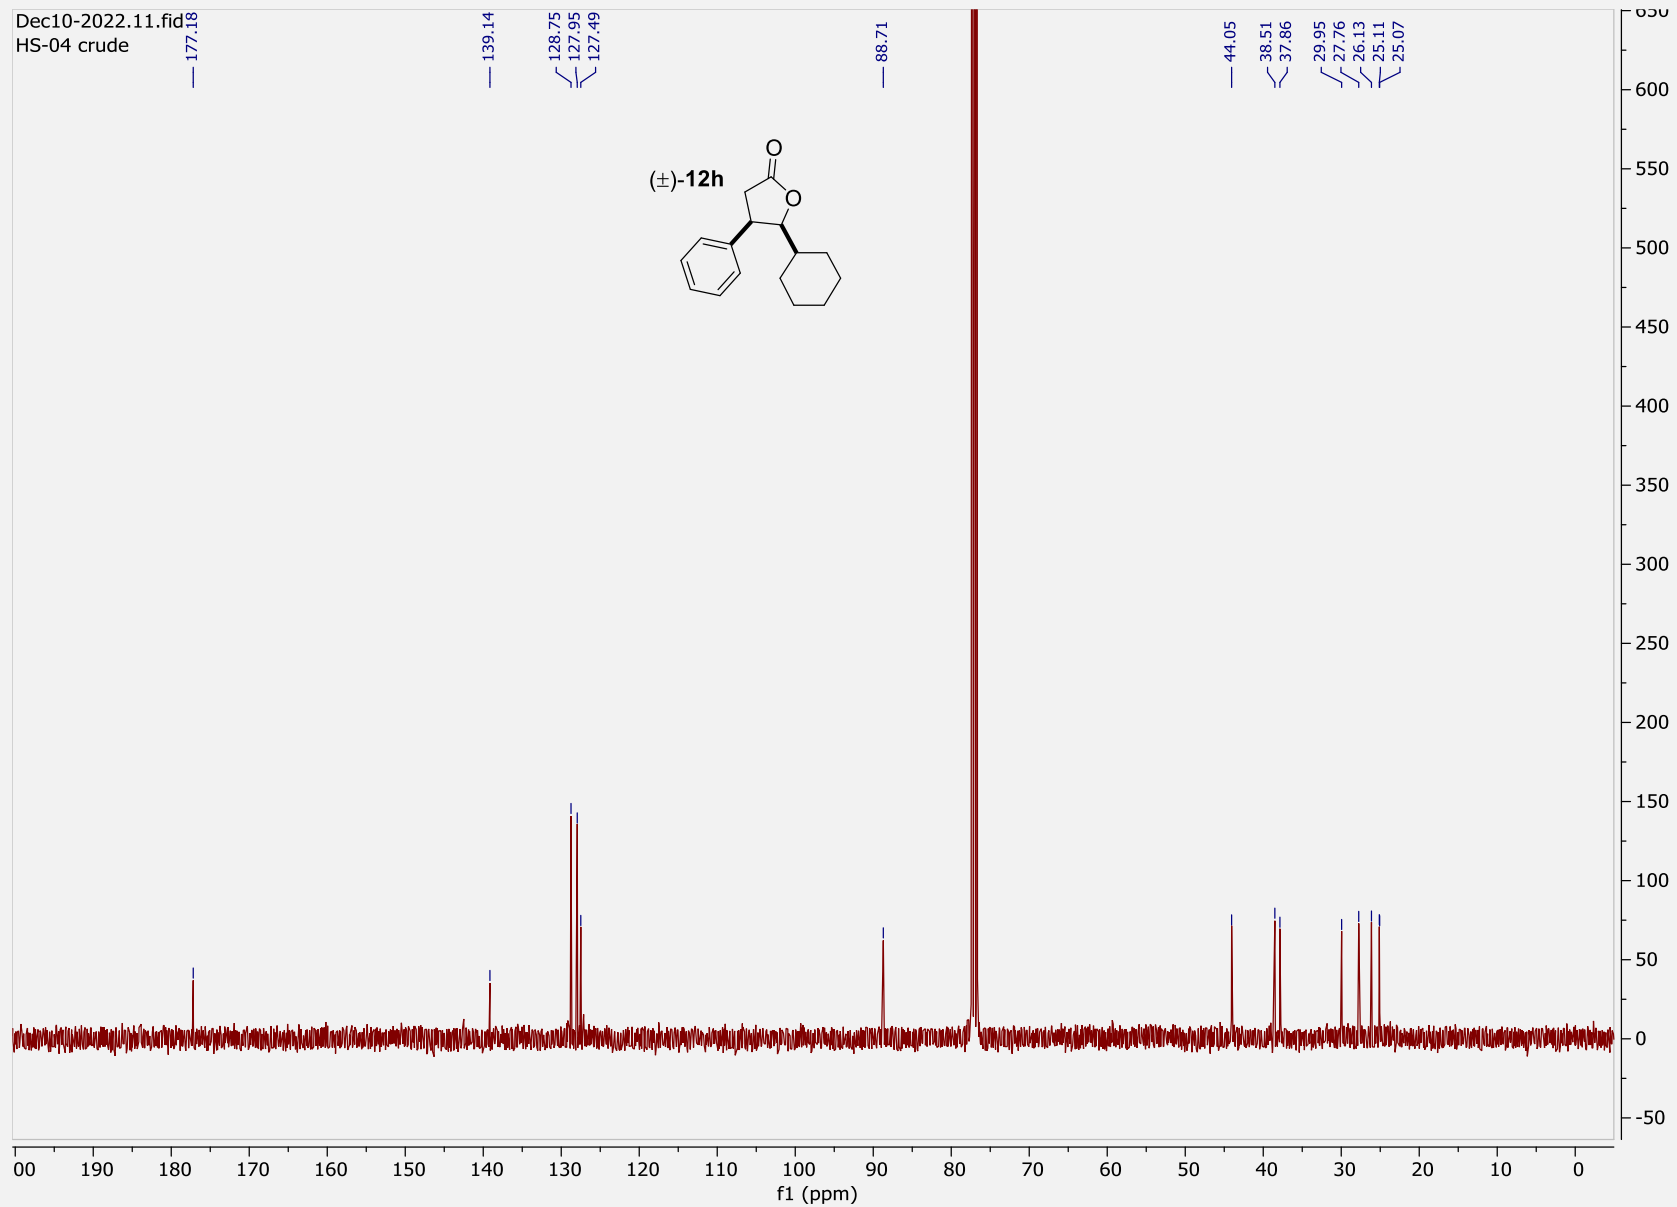

S132

12h.11.ser  
user Oluwarotimi Ojo  
NOESY2D.GLA CDCl3 /u oluajo 13

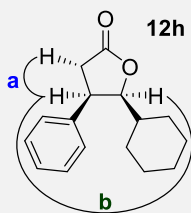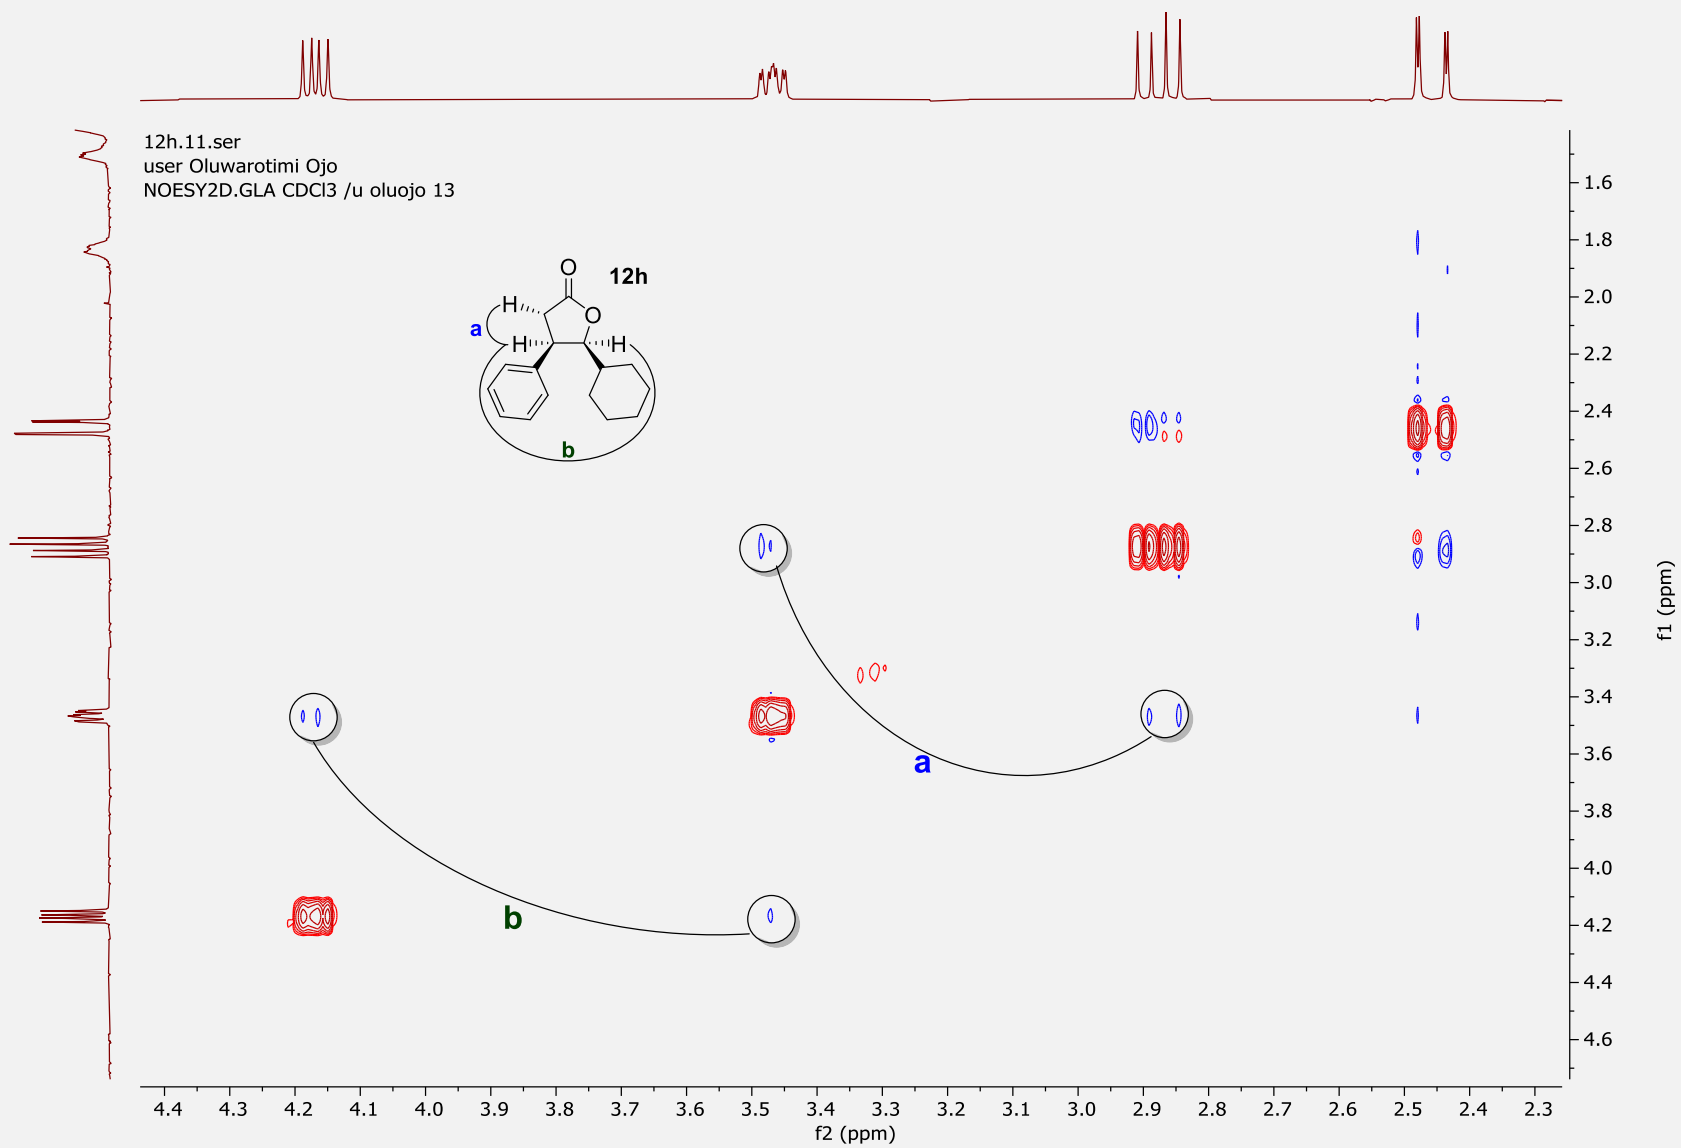

S133

Exp. 71P.10.fid

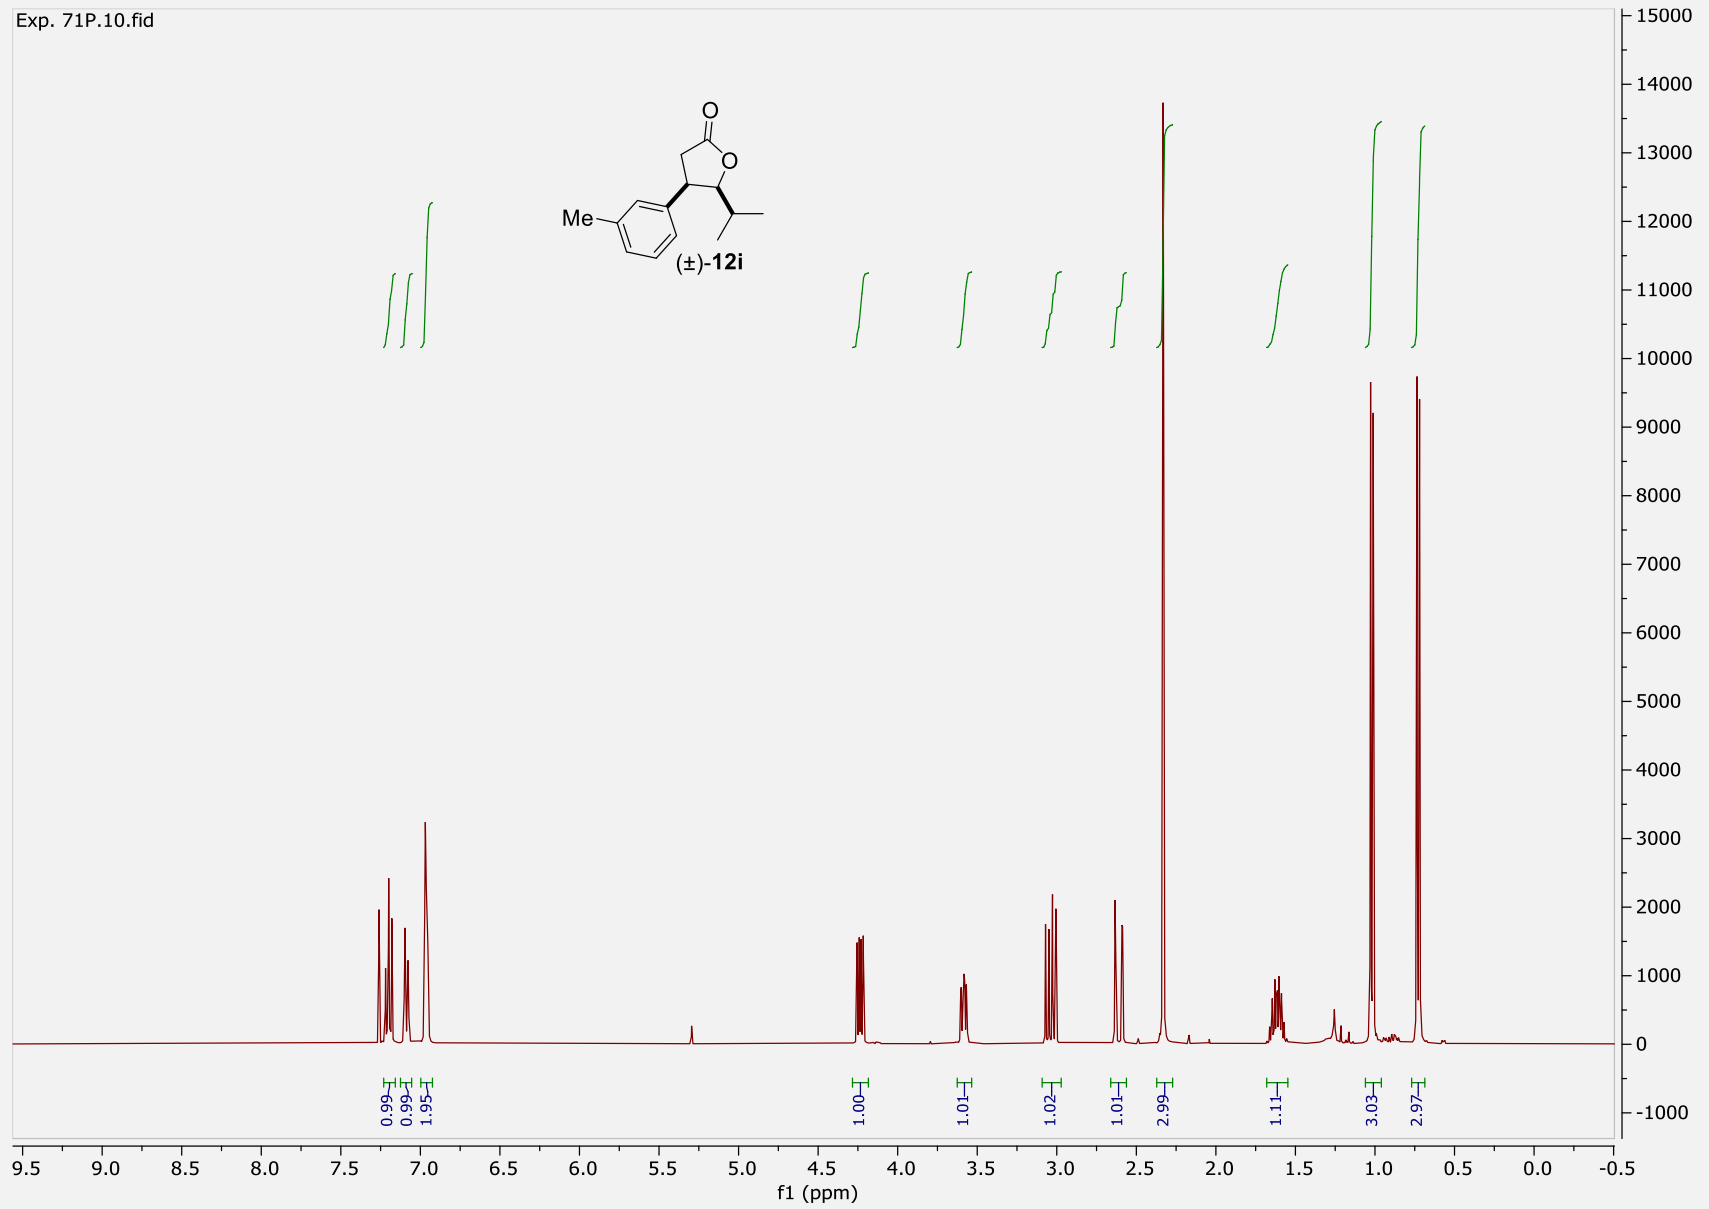

S134

Exp. 71P.11.fid

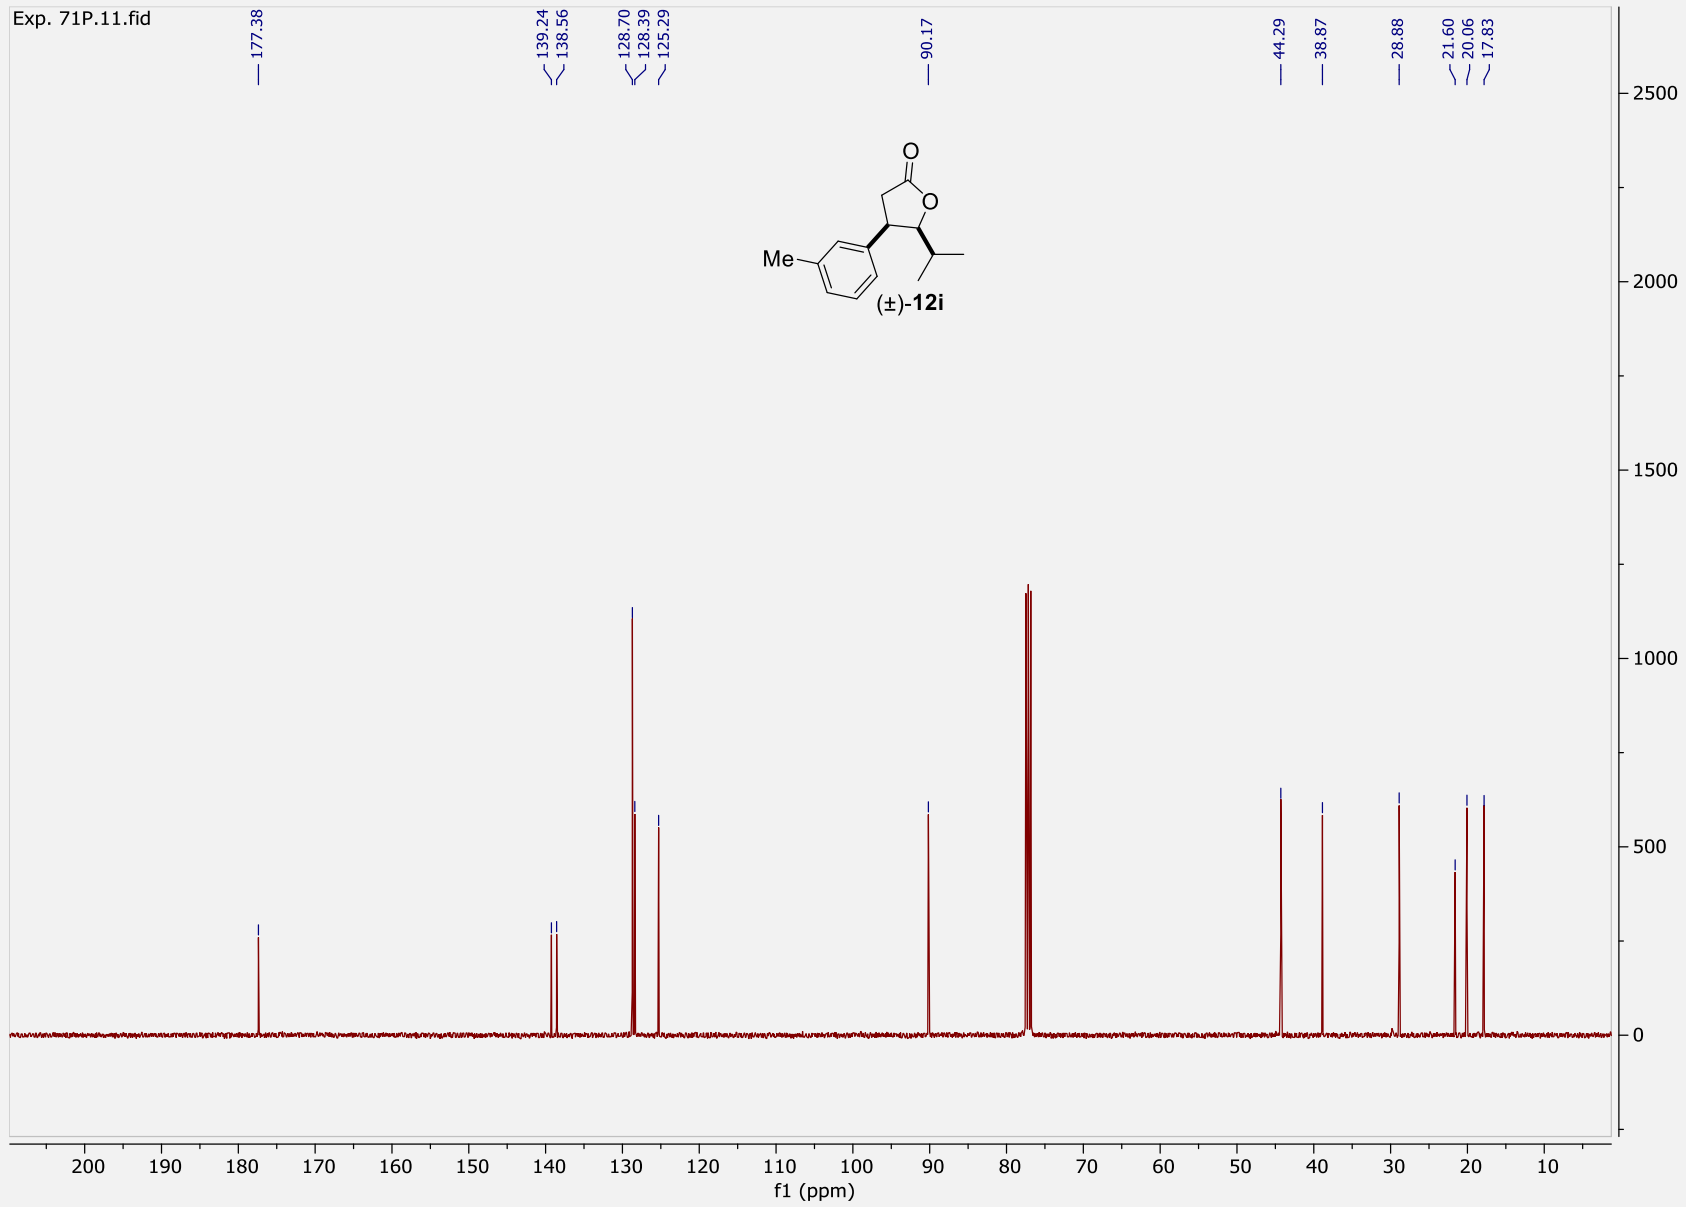

S135

Exp. 74P.10.fid

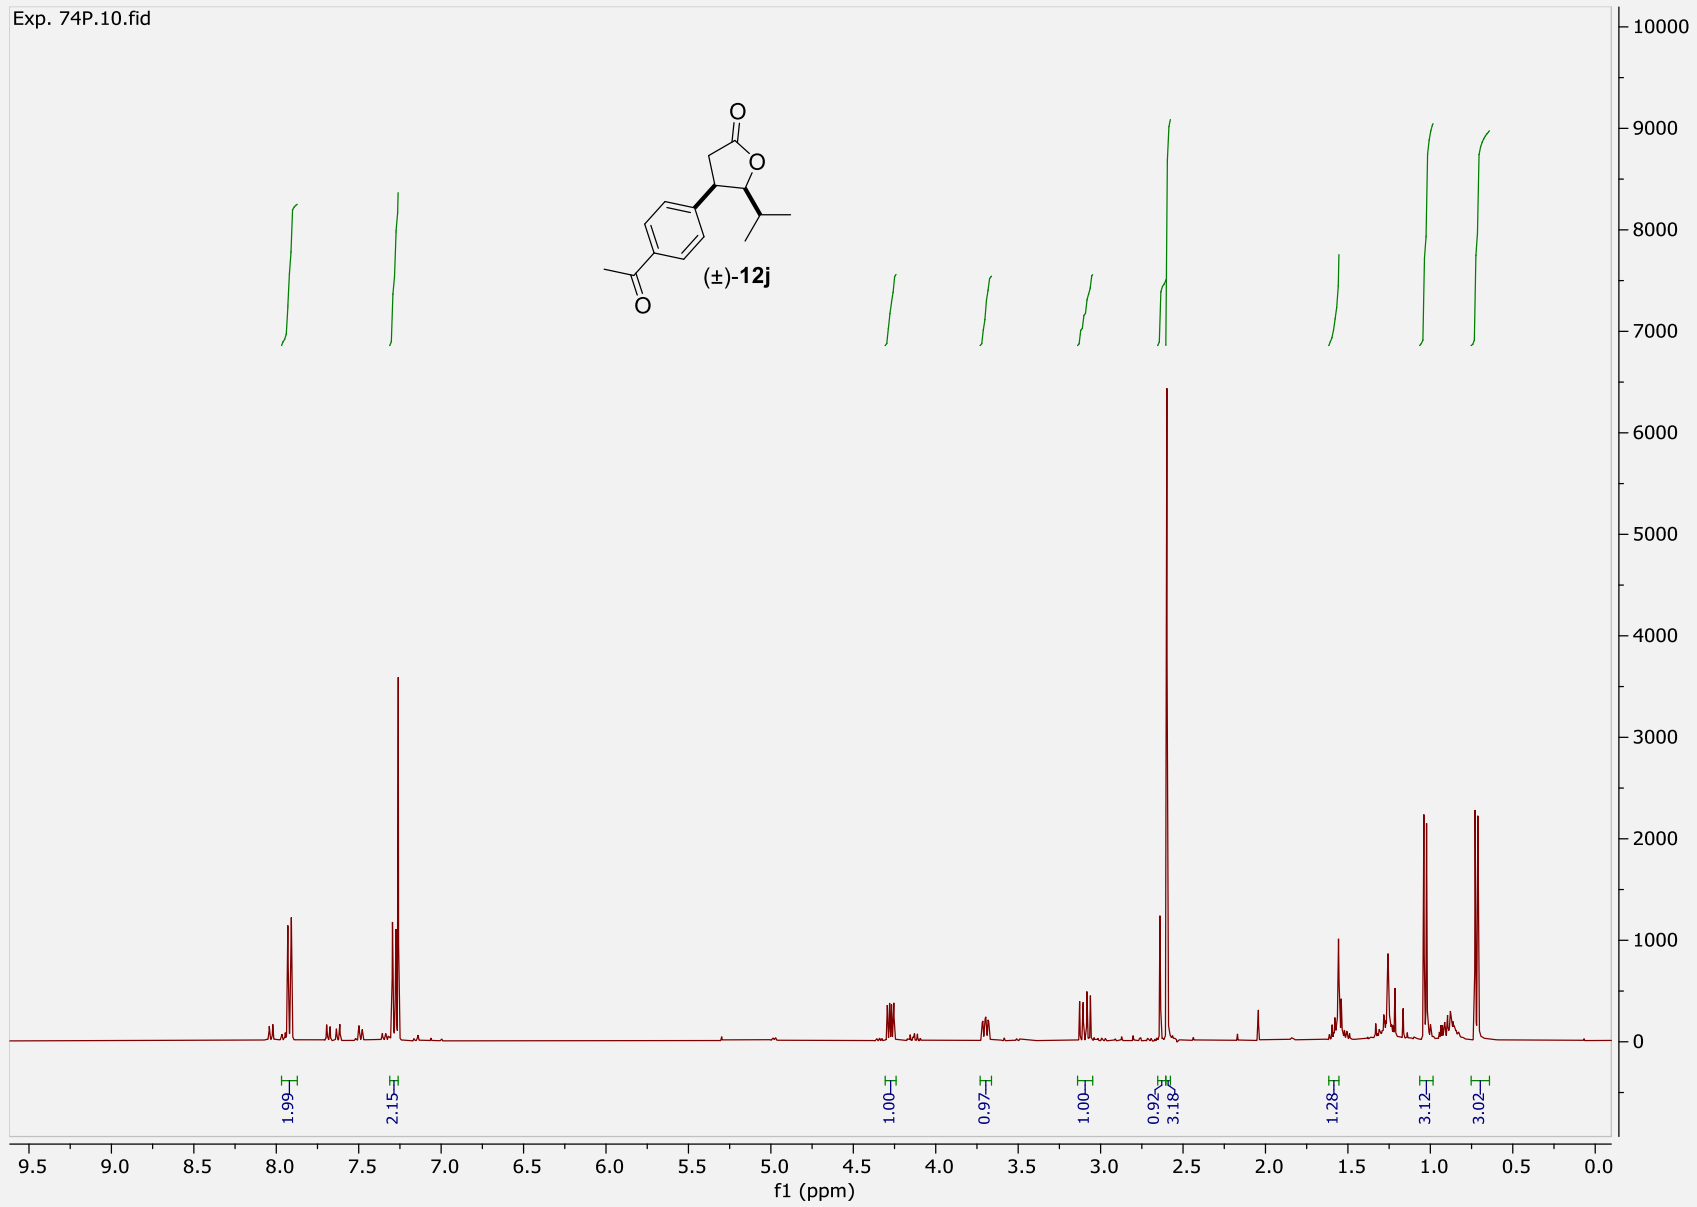

S136



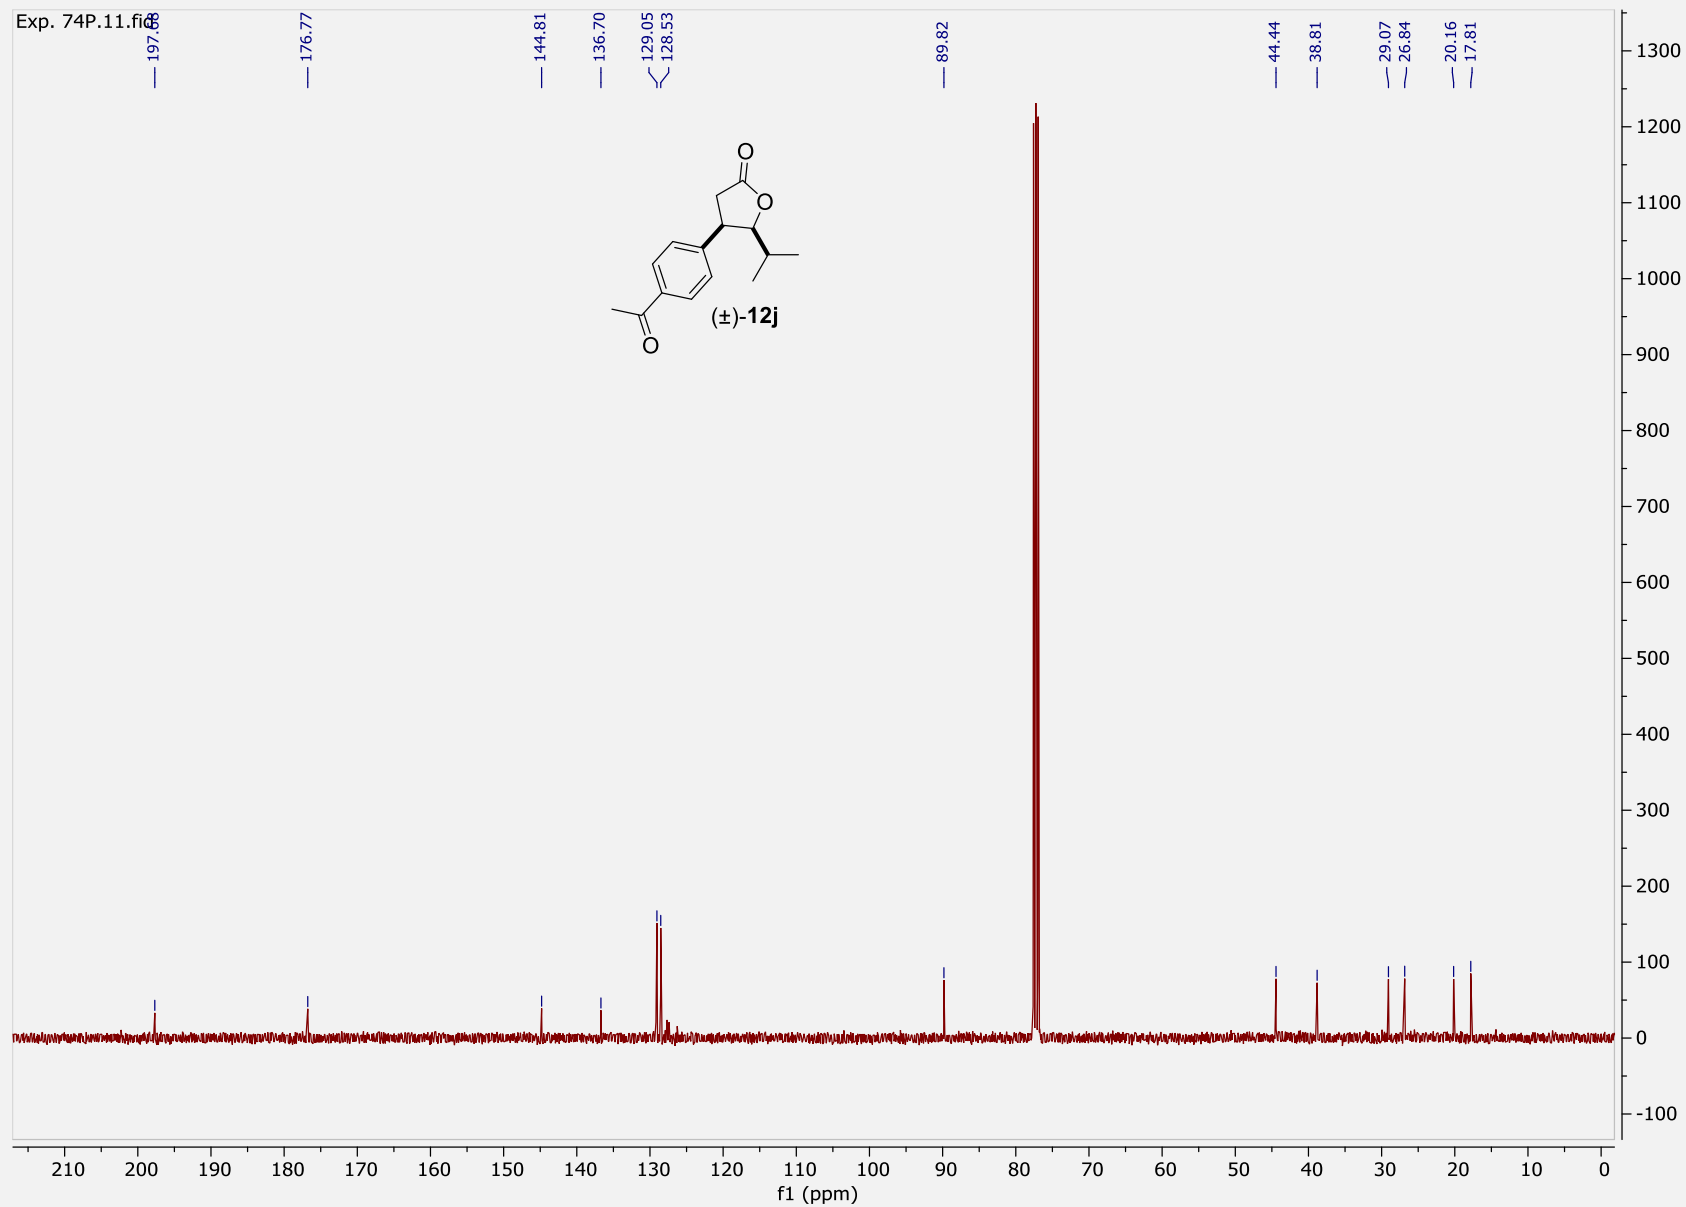

S137

Exp. 69P.12.fid

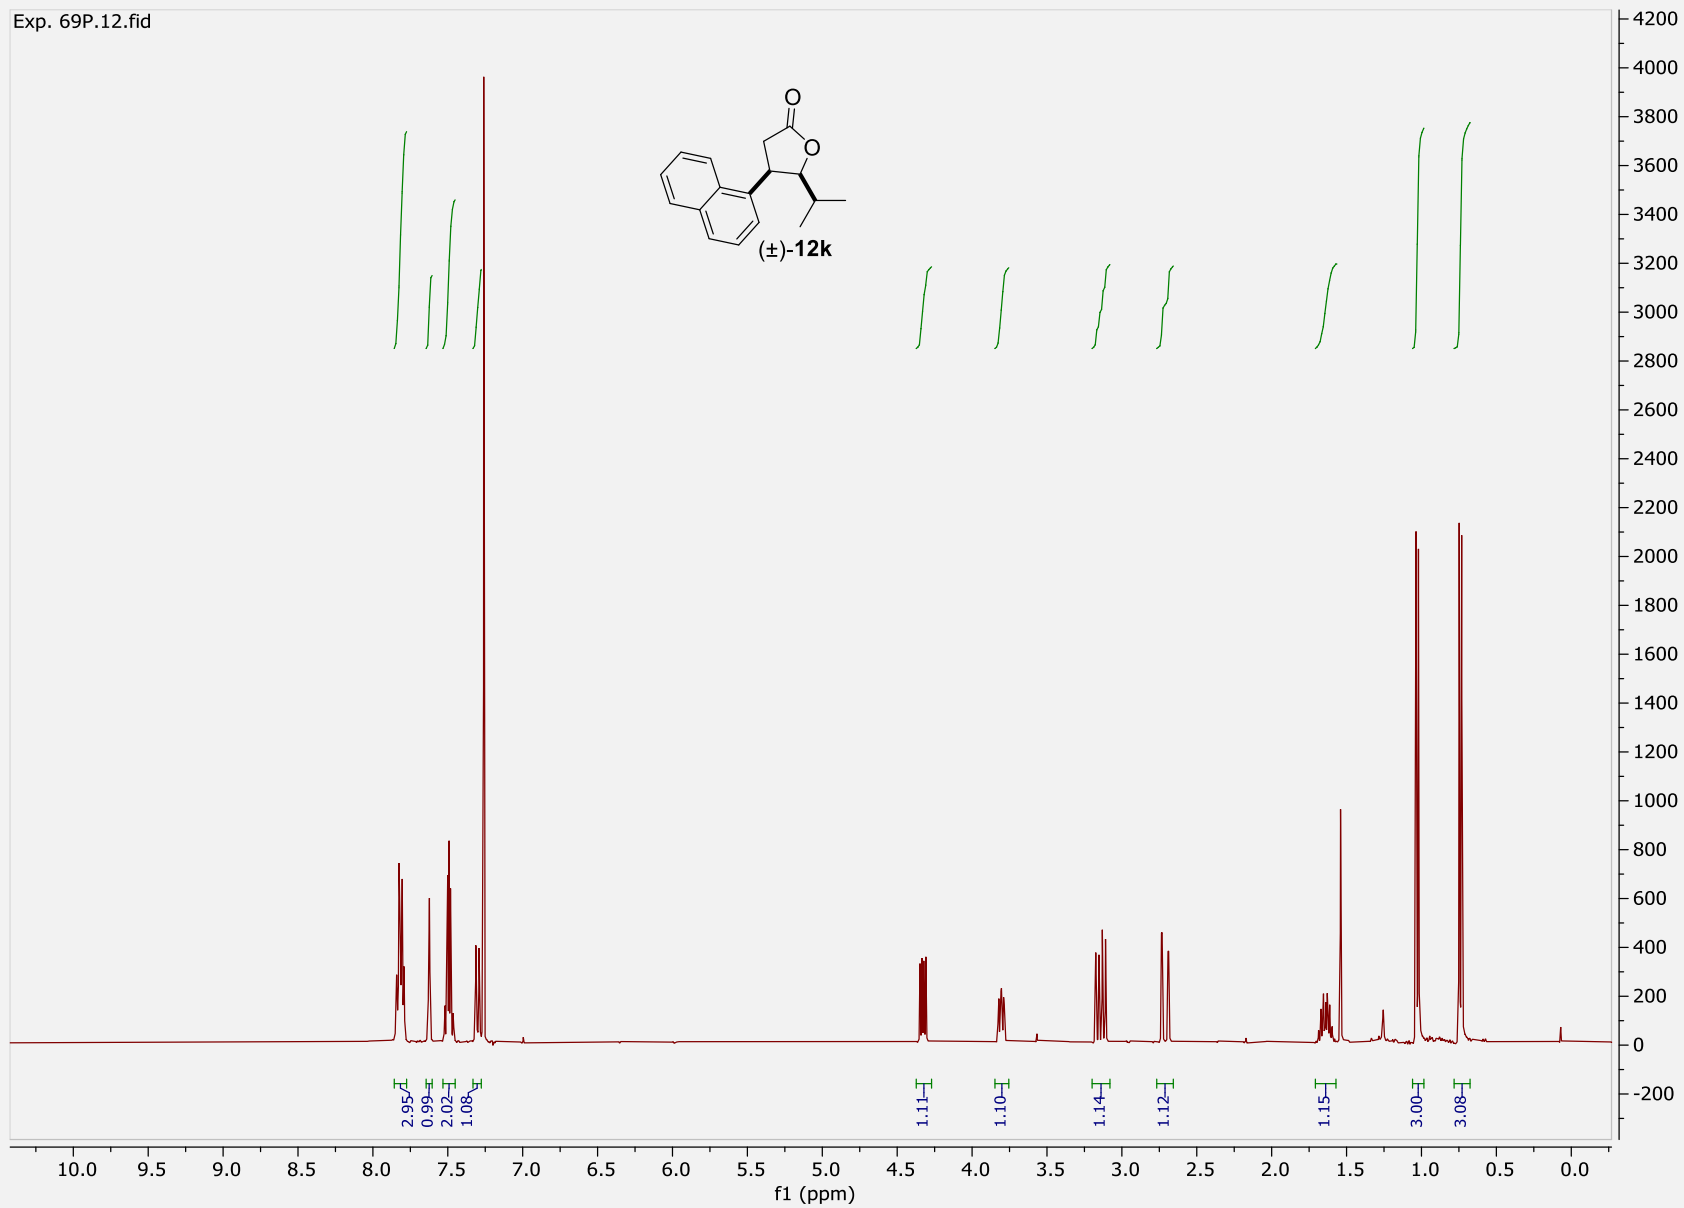

S138

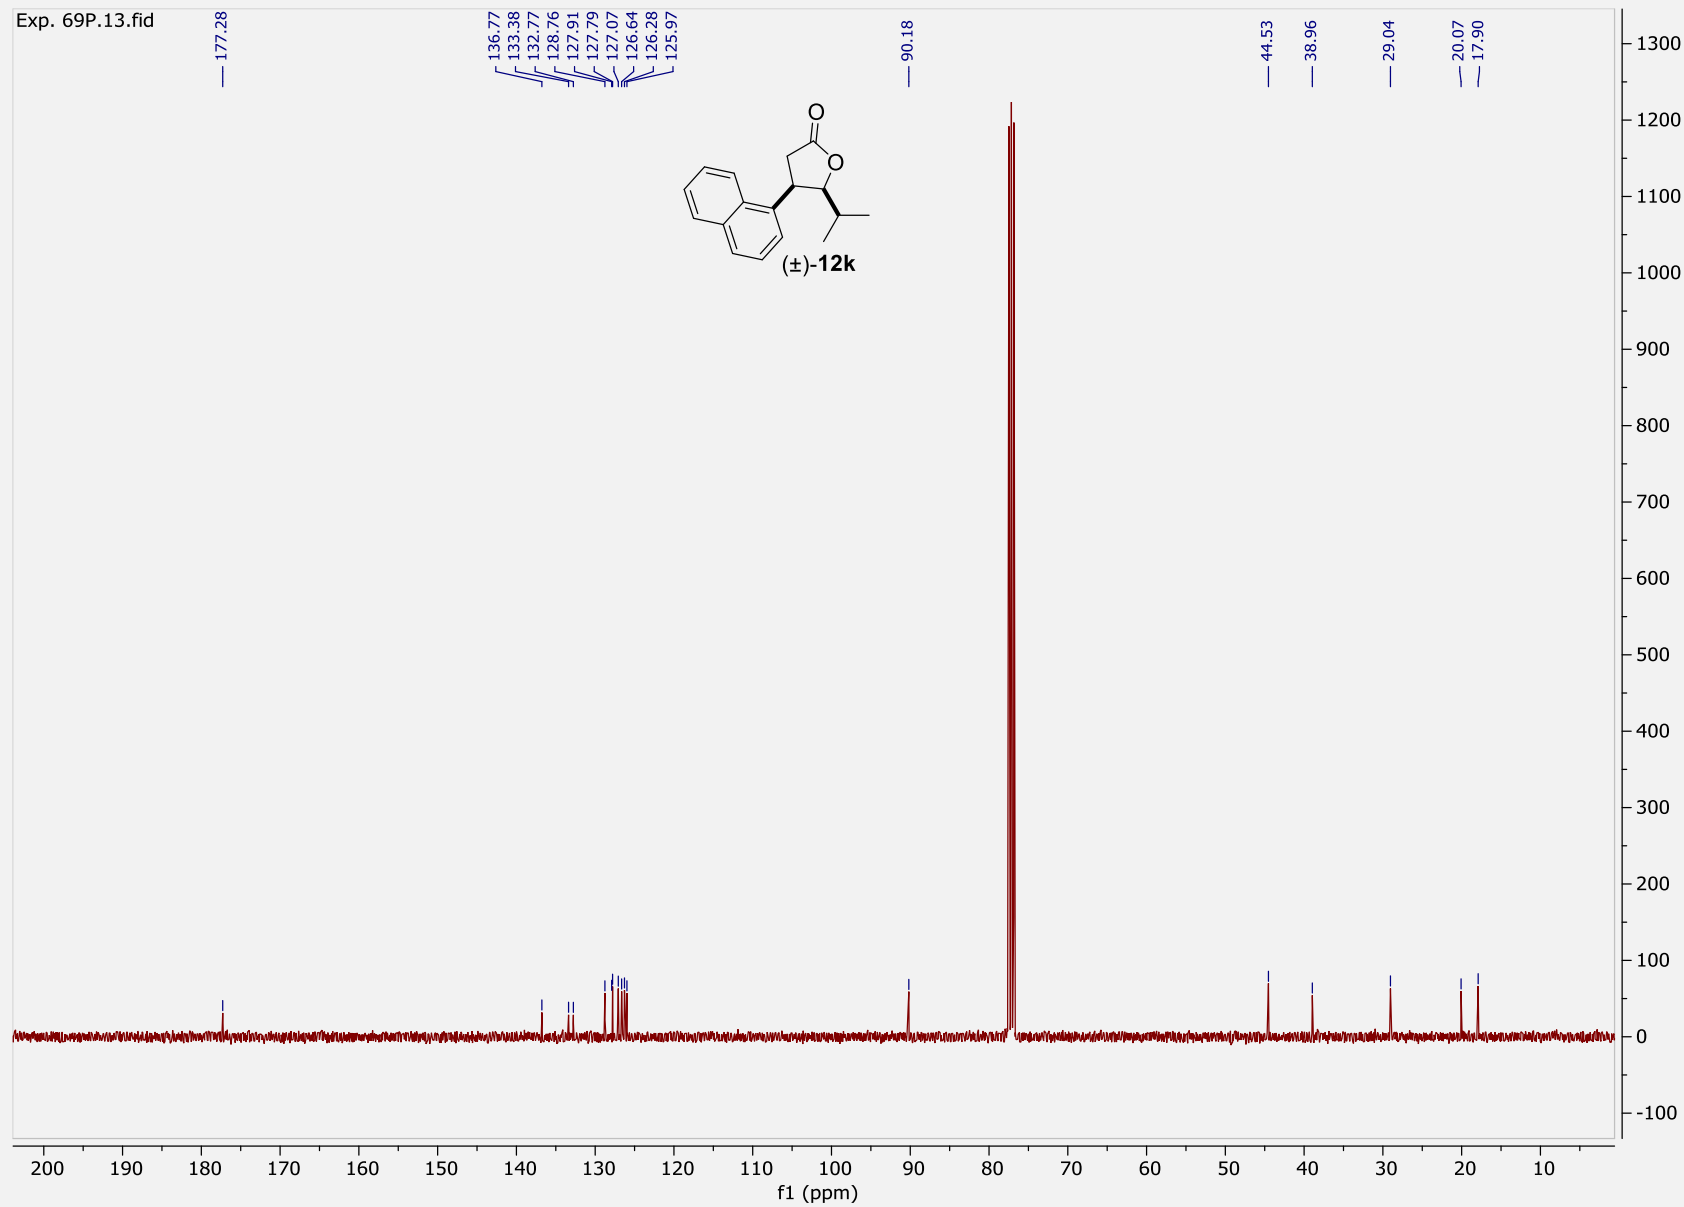

S139

Exp. 72P.12.fid

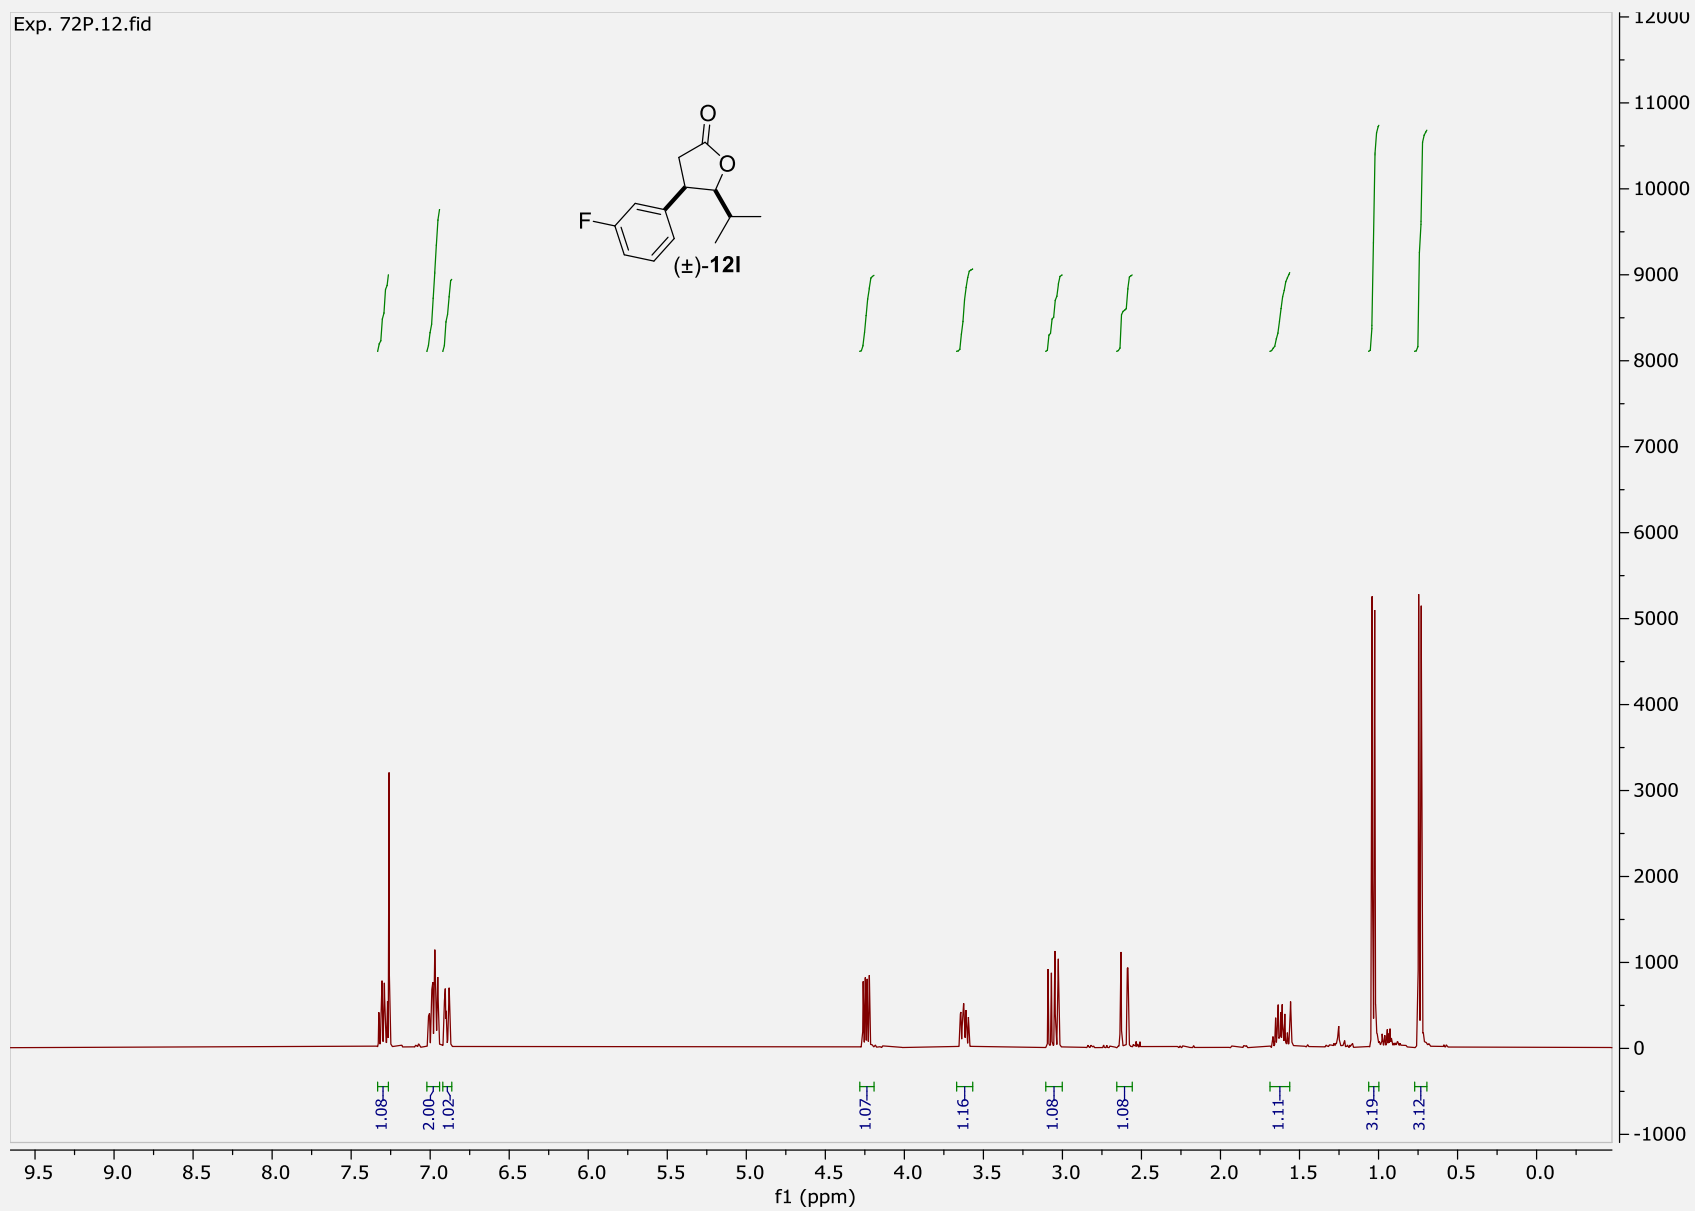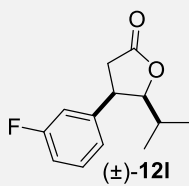

S140

Exp. 72P.13.fid

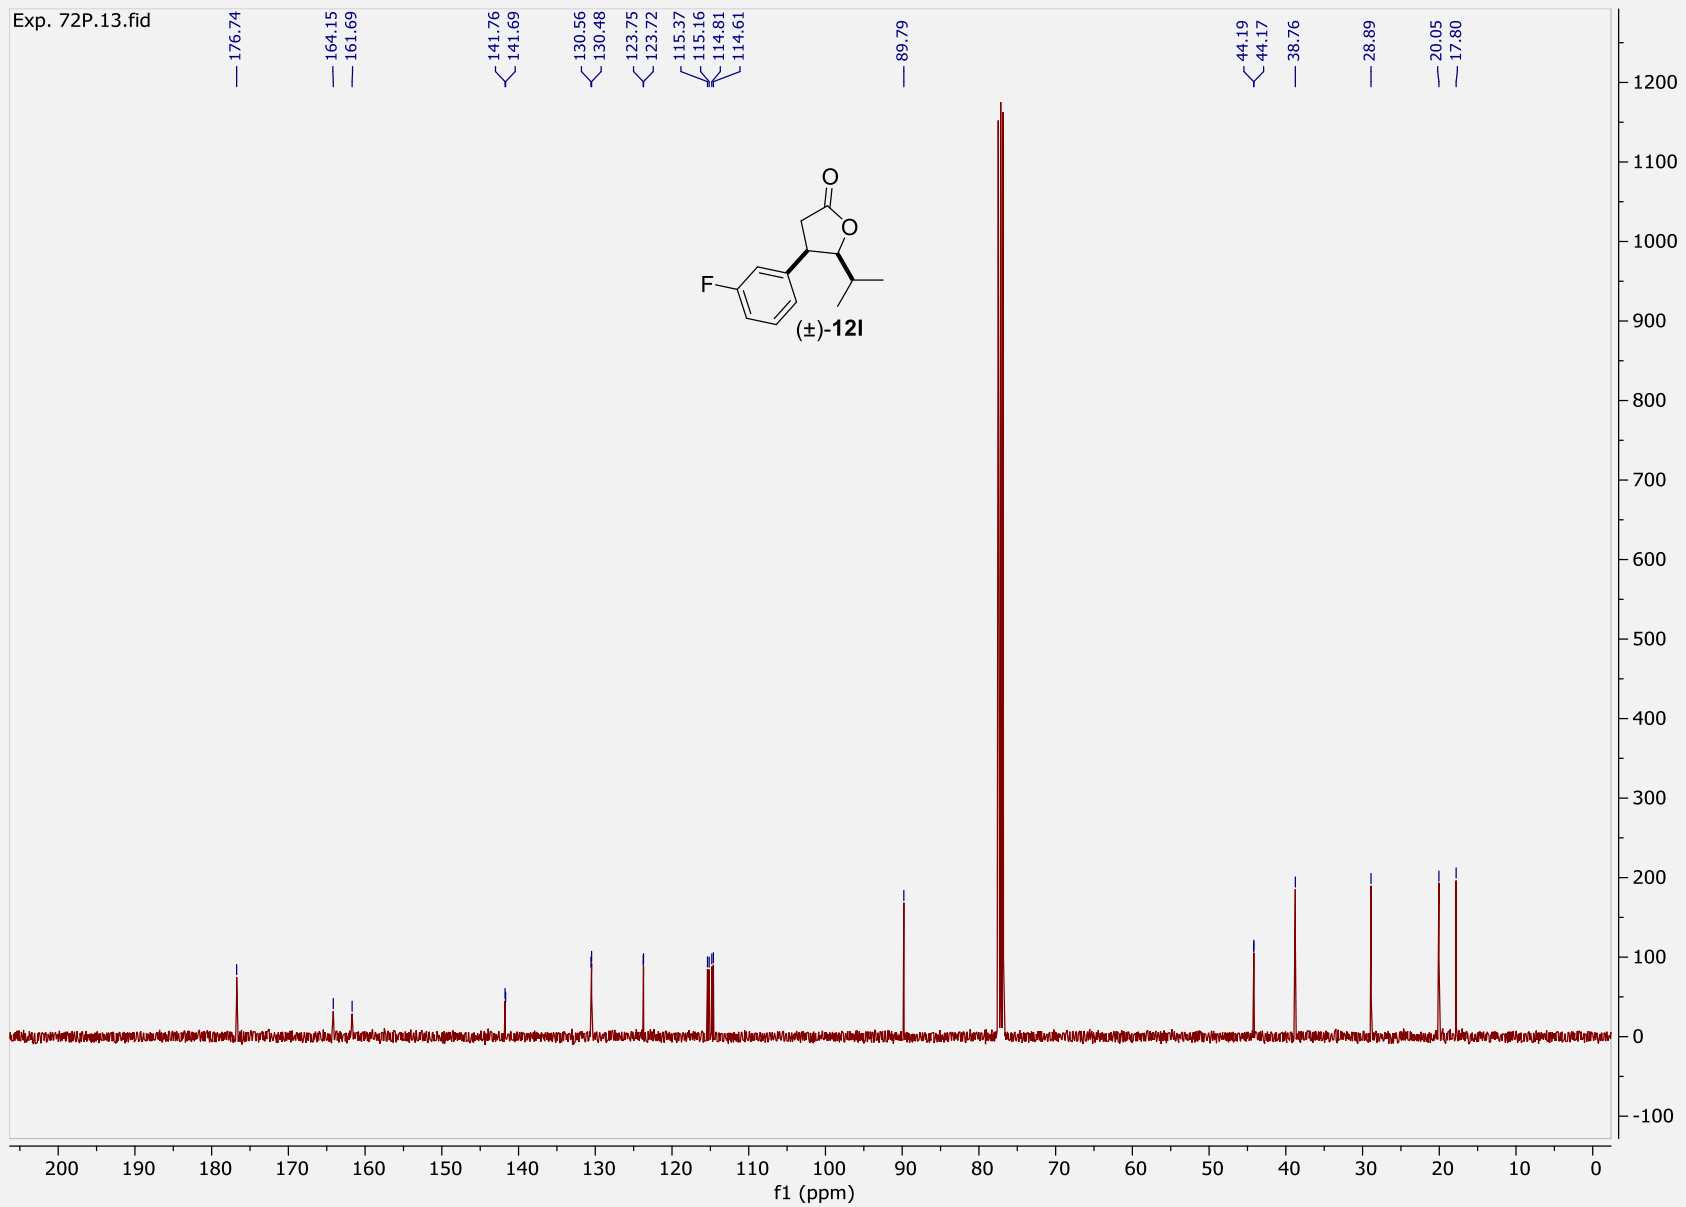

S141

Exp. 72.20.fid  
user Oluwarotimi Ojo  
F19CPD.GLA CDCl3 /u oluajo 54

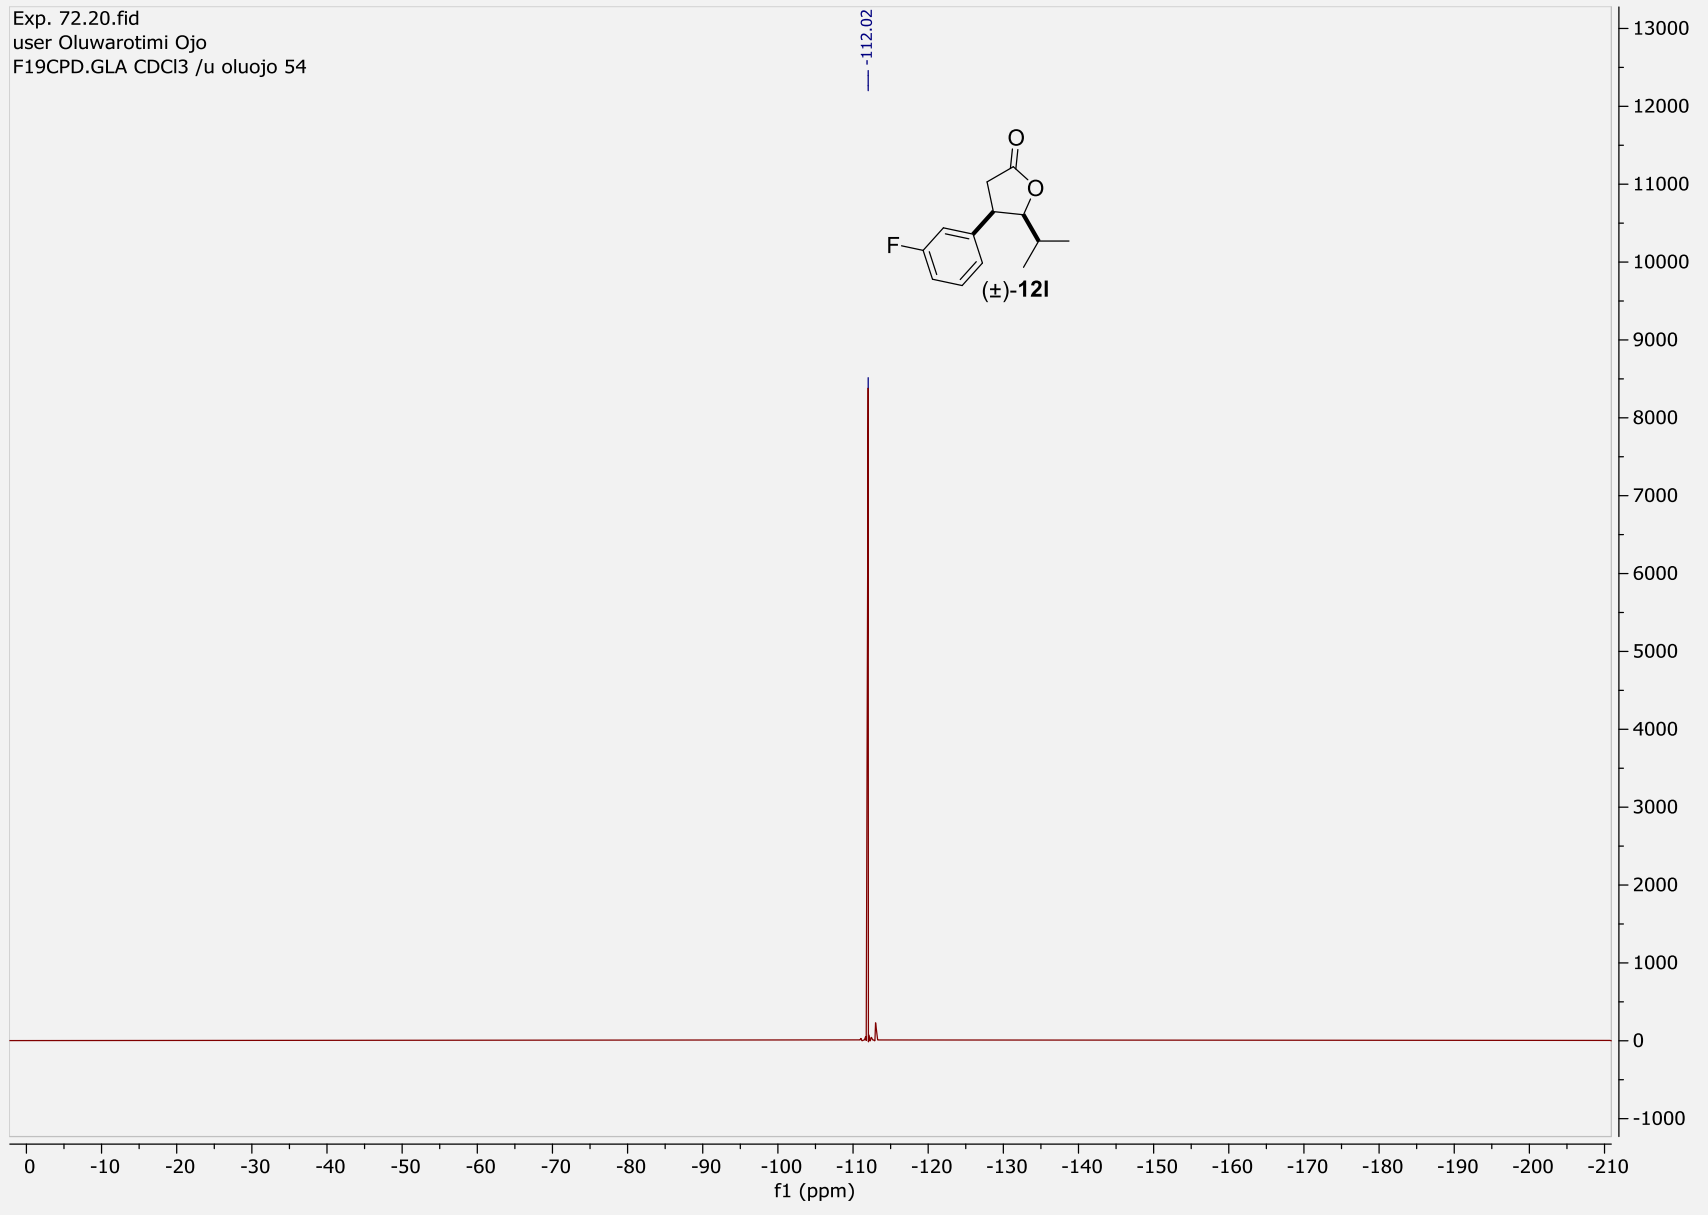

S142

Exp. 73\_F21.10.fid

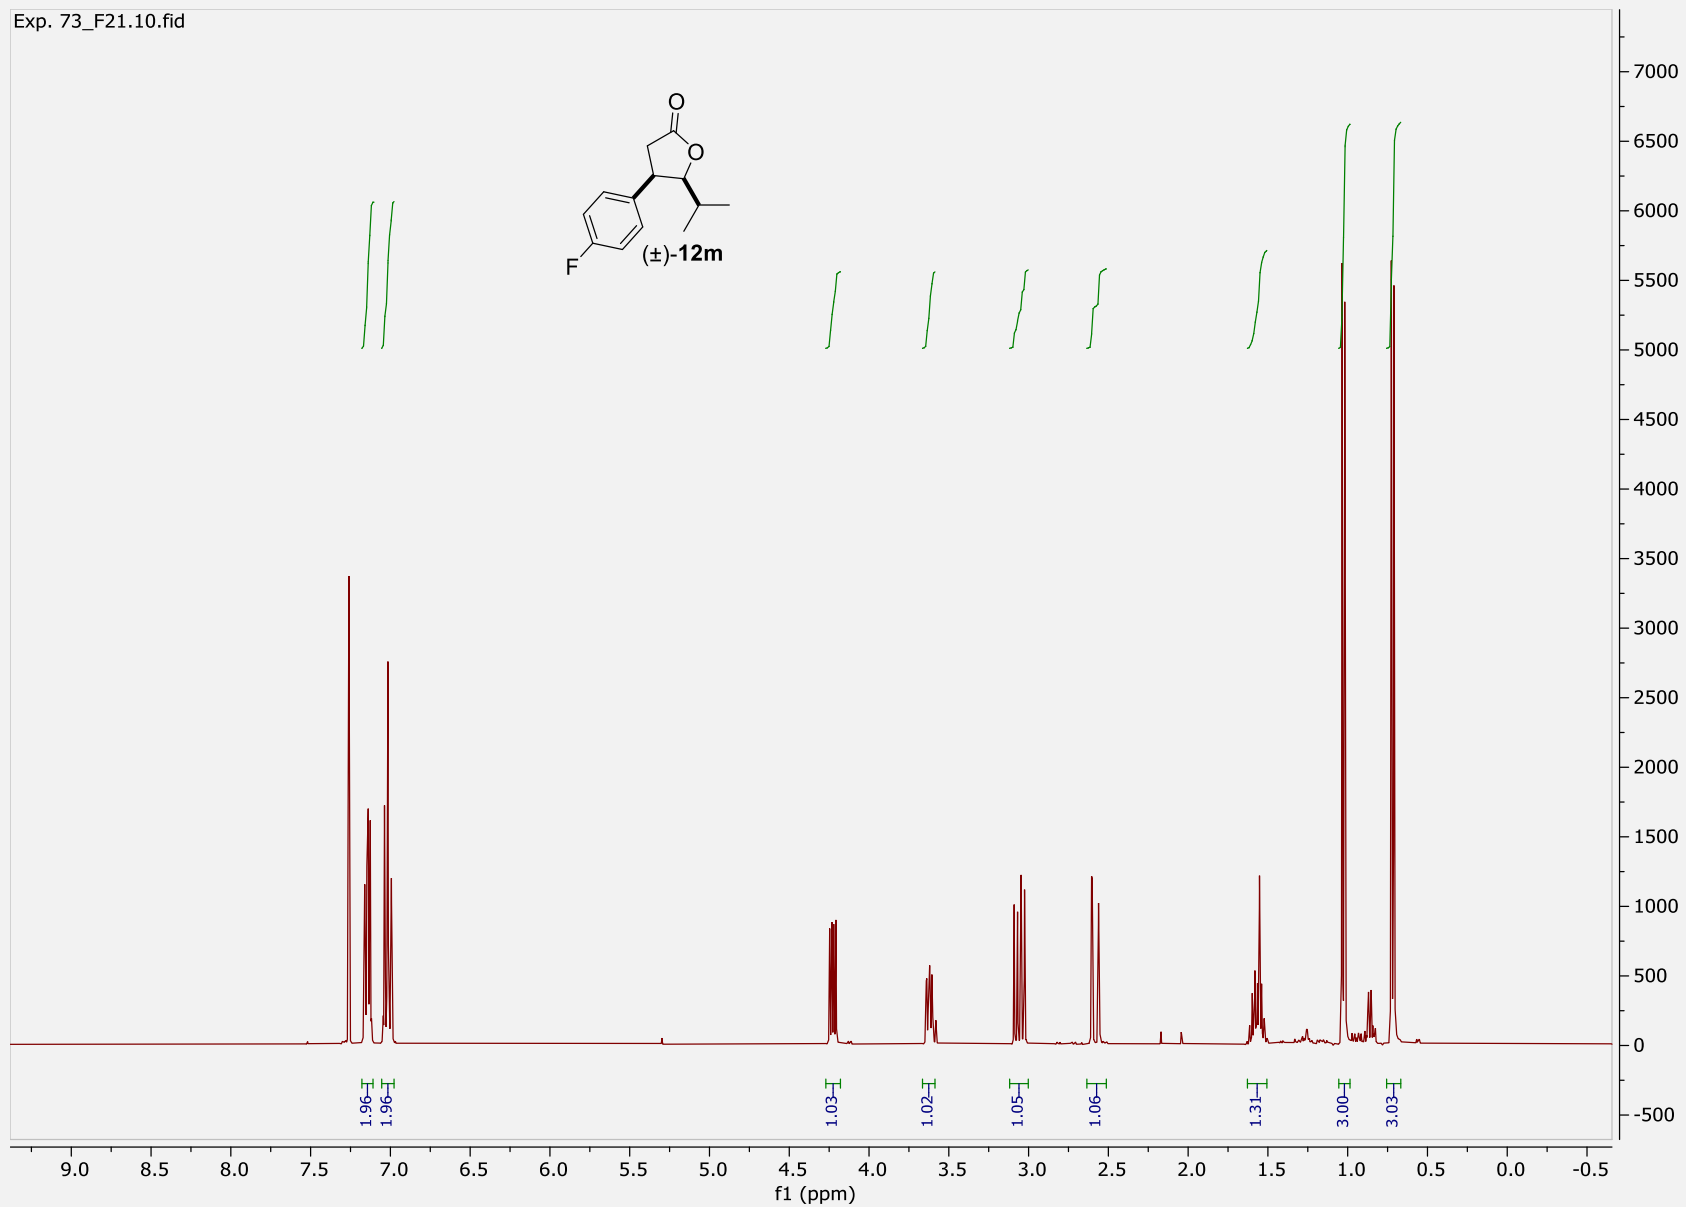

S143

Exp. 73\_F21.12.fid

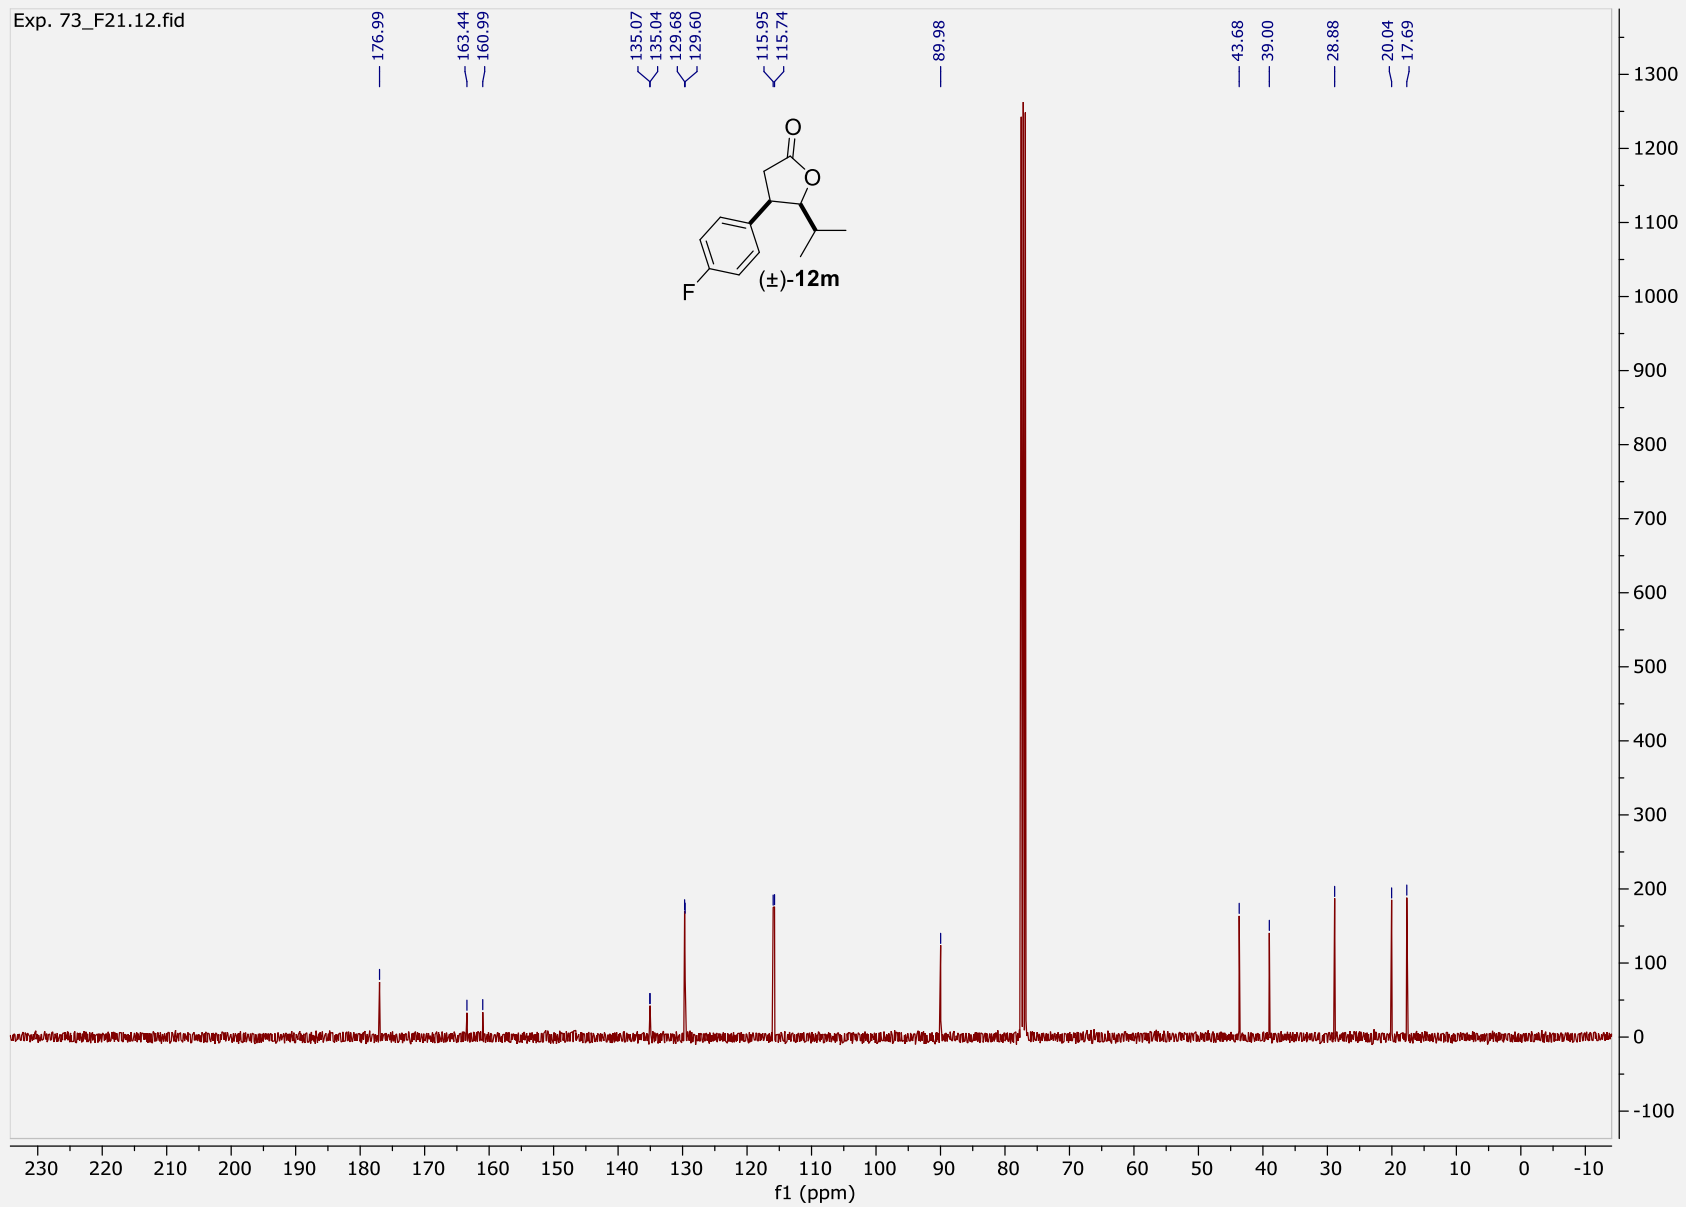

S144



Exp. 73\_F21.10.fid  
user Oluwarotimi Ojo  
F19CPD.GLA CDCl3 /u oluajo 55

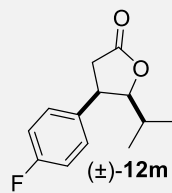

-114.62

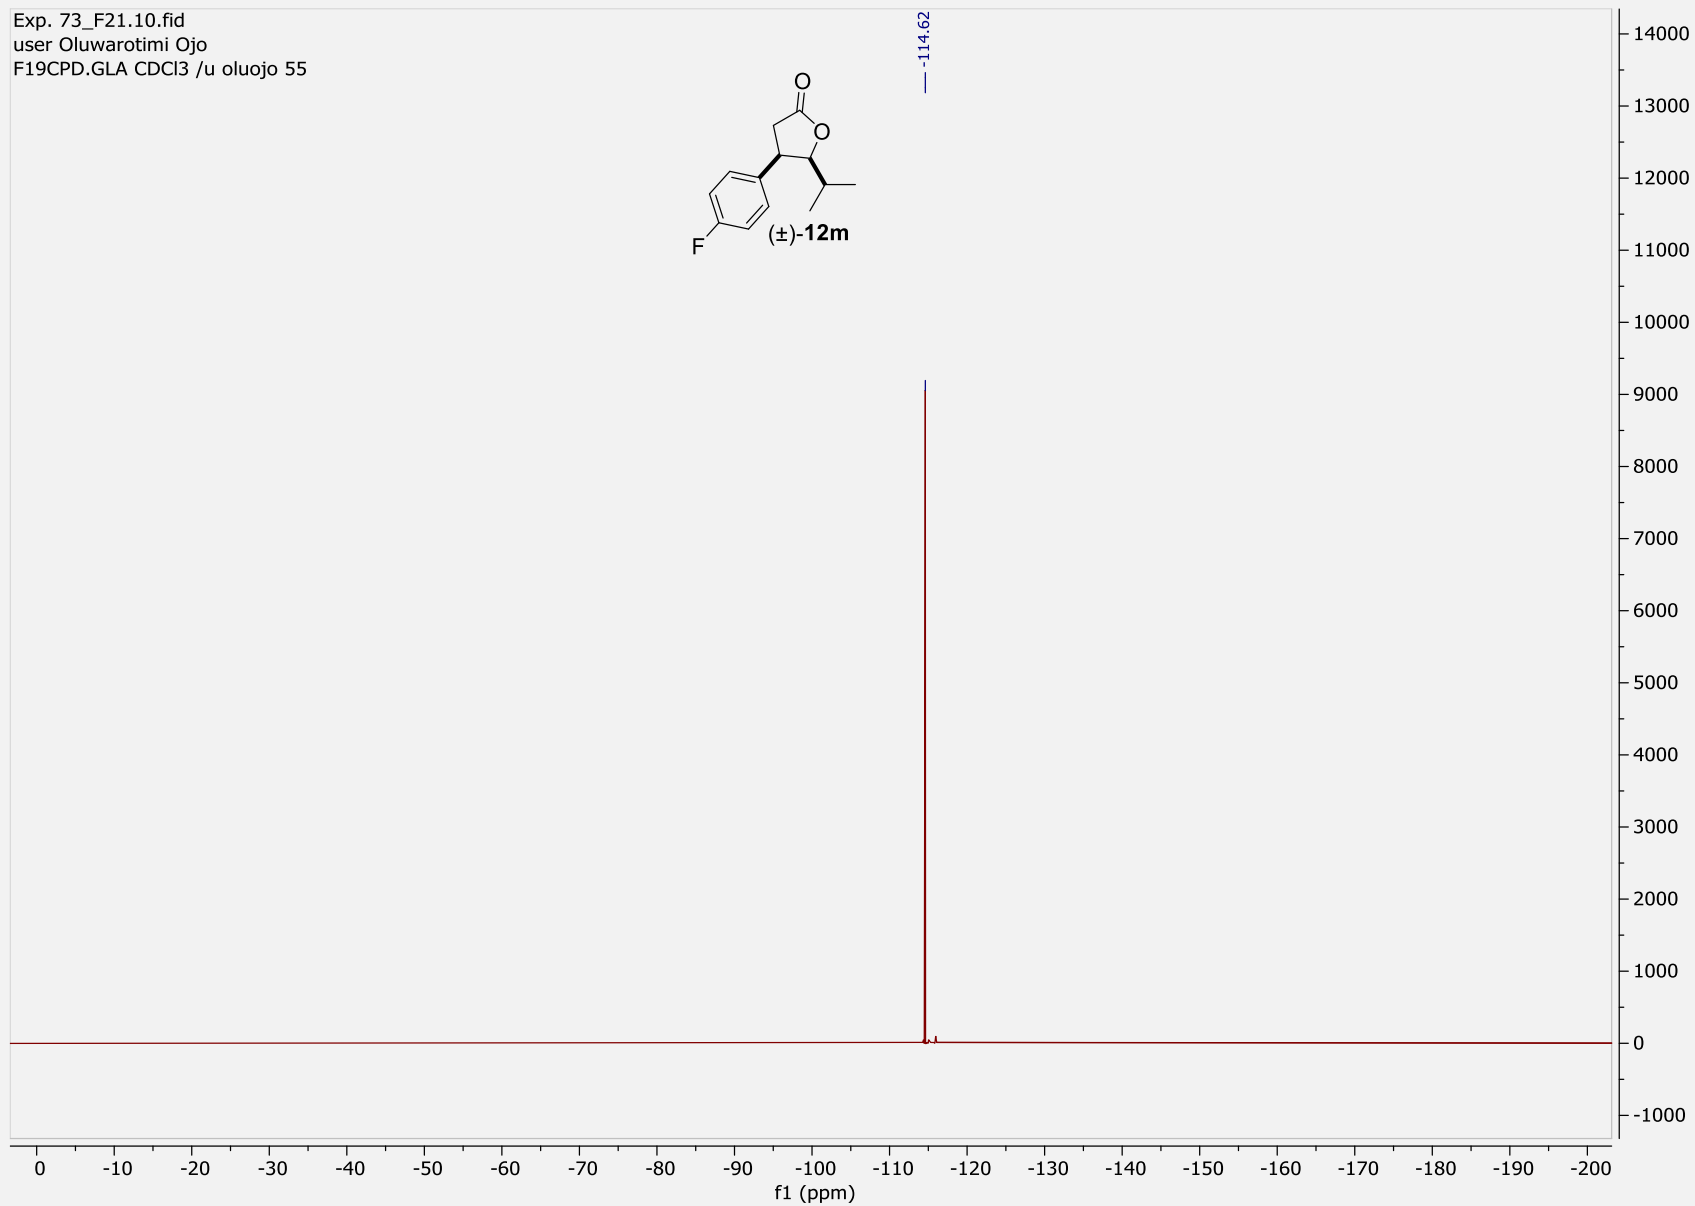

S145

Exp. 70P.10.fid

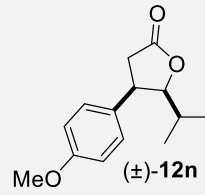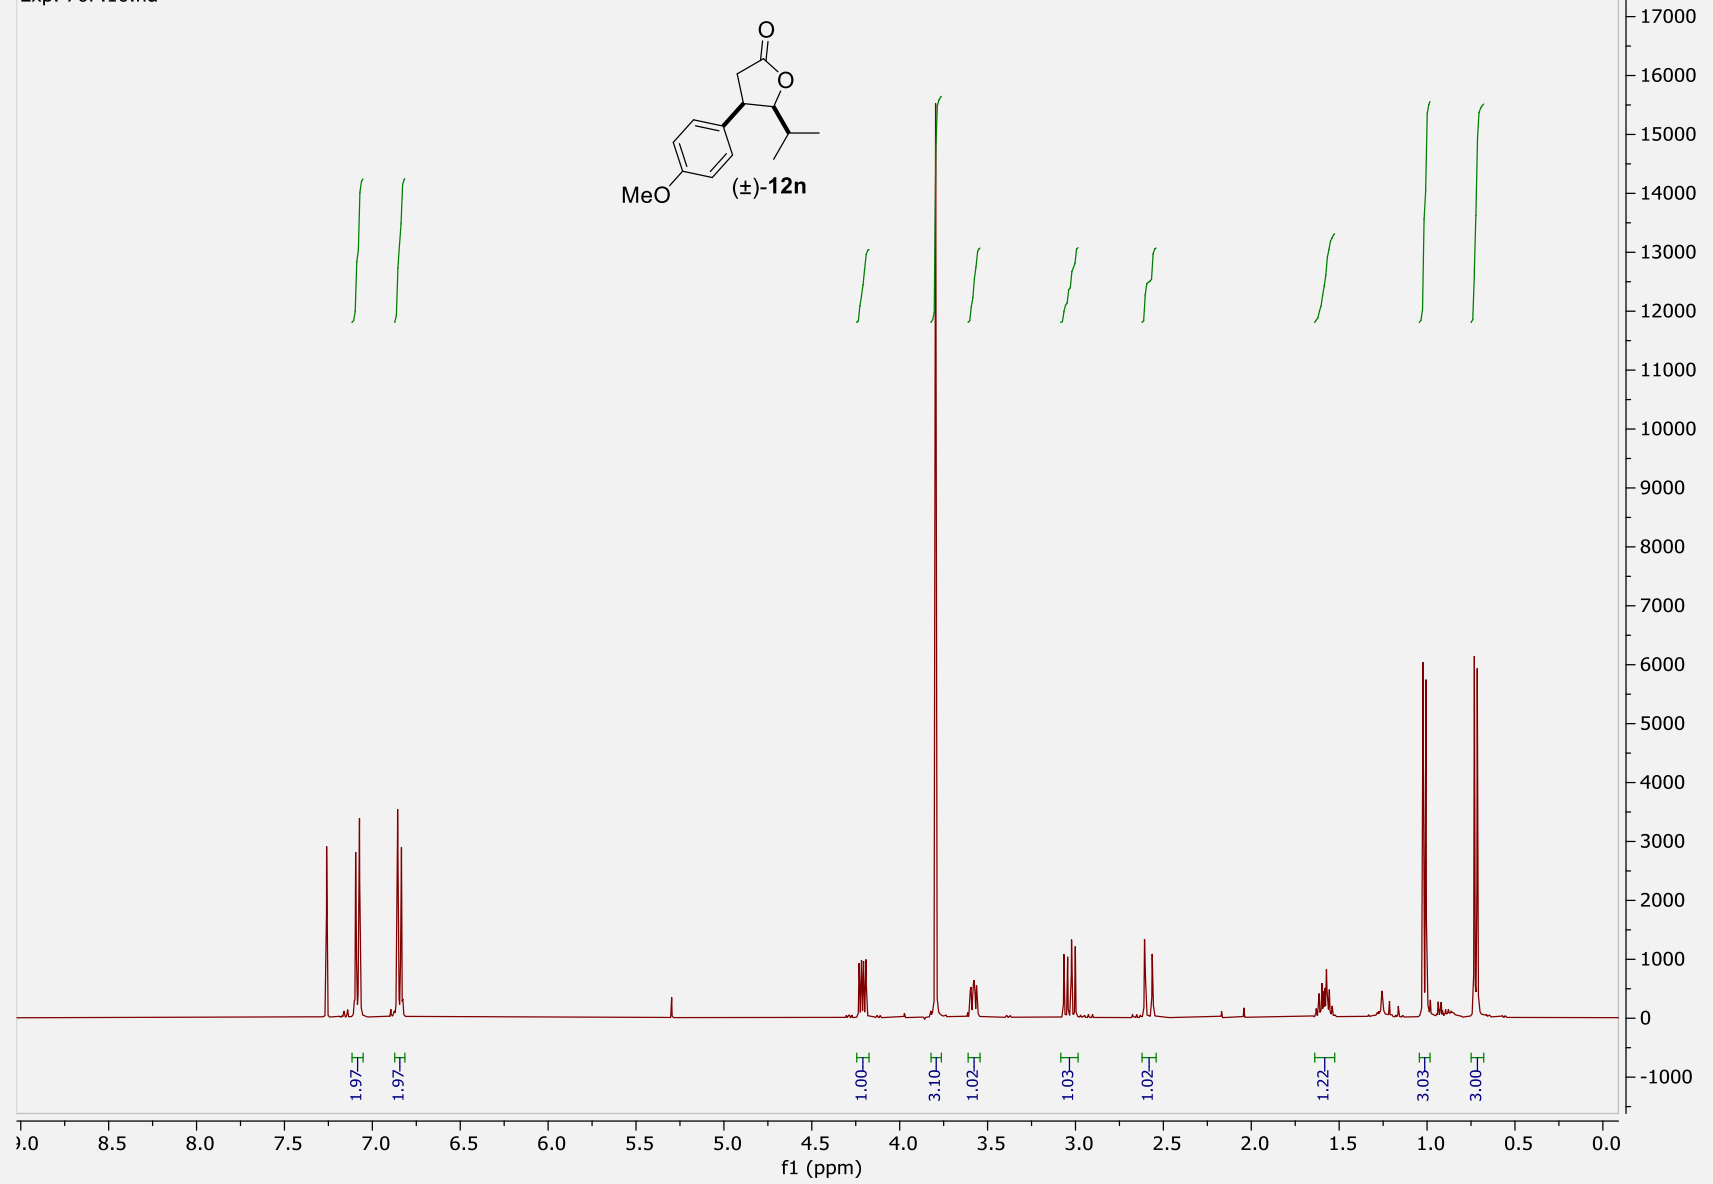

S146

Exp. 70P.11.fid

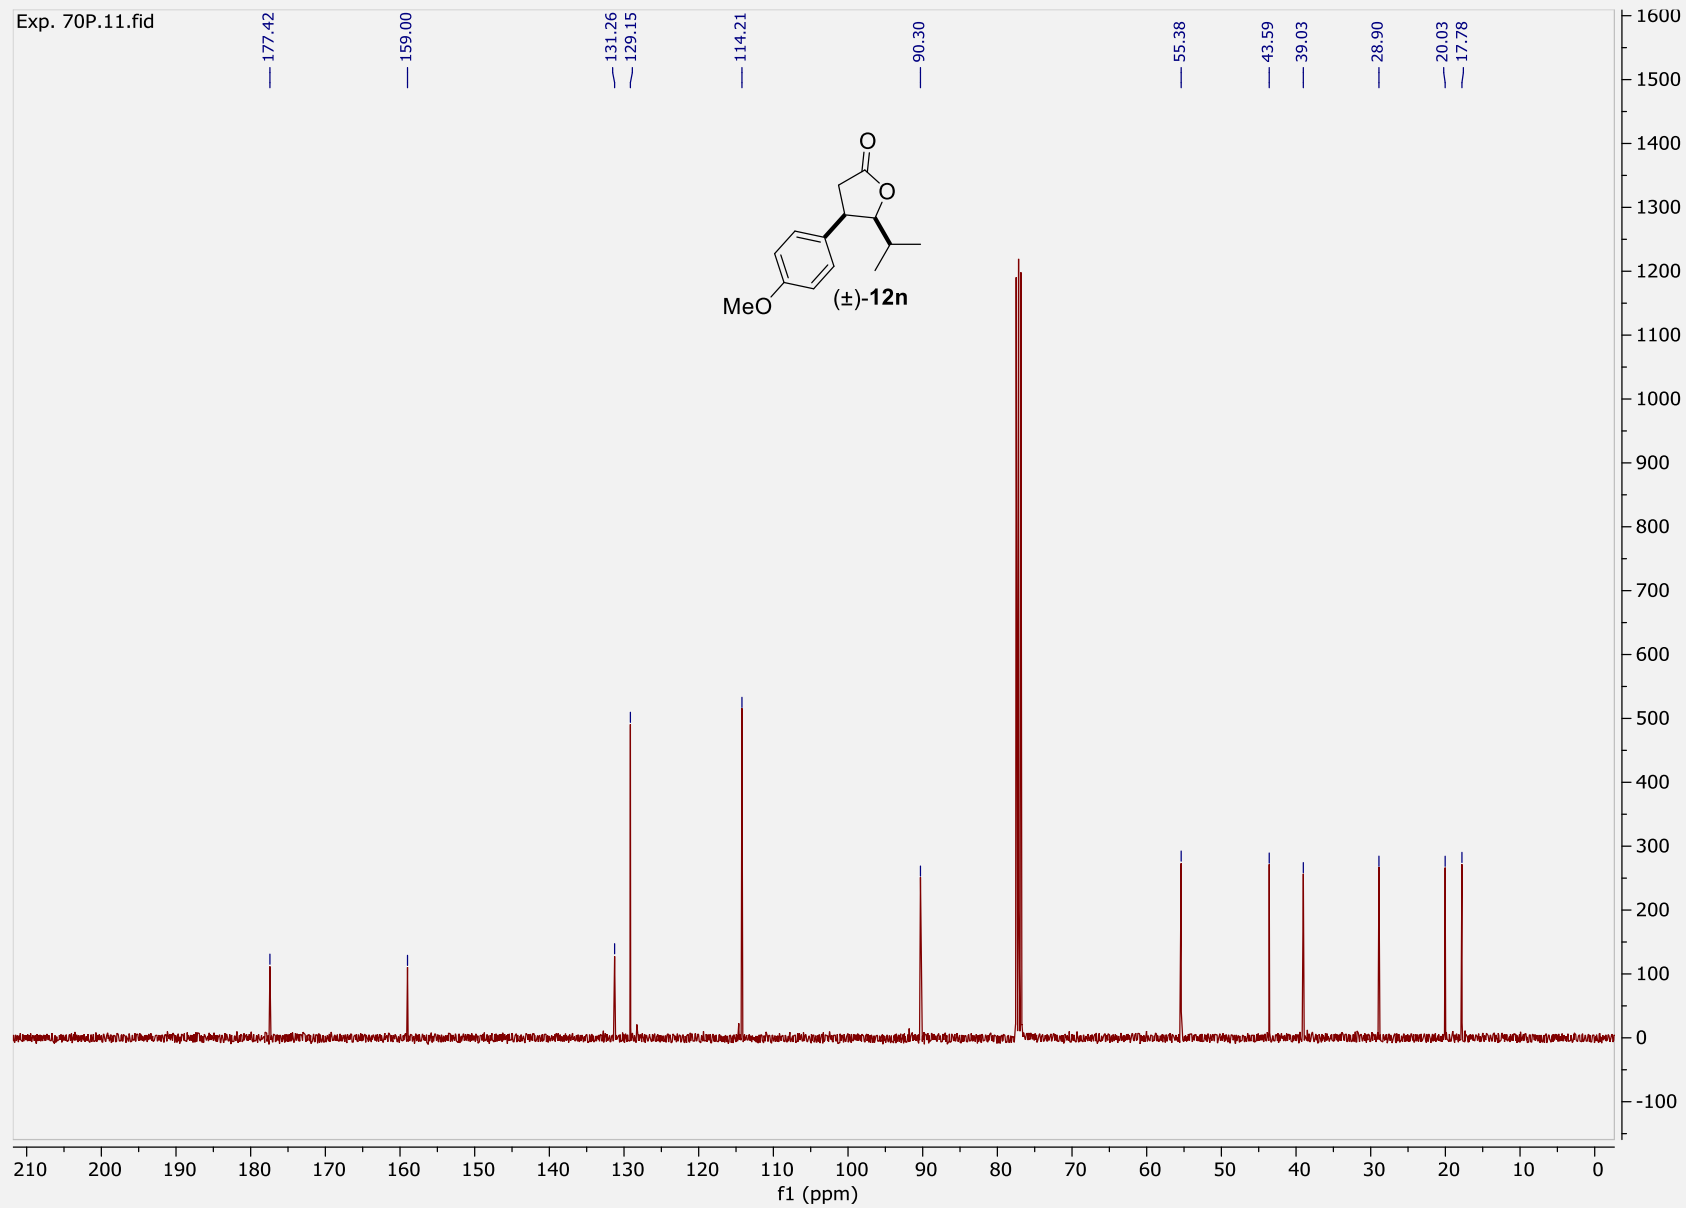

S147

Exp. 75P.10.fid

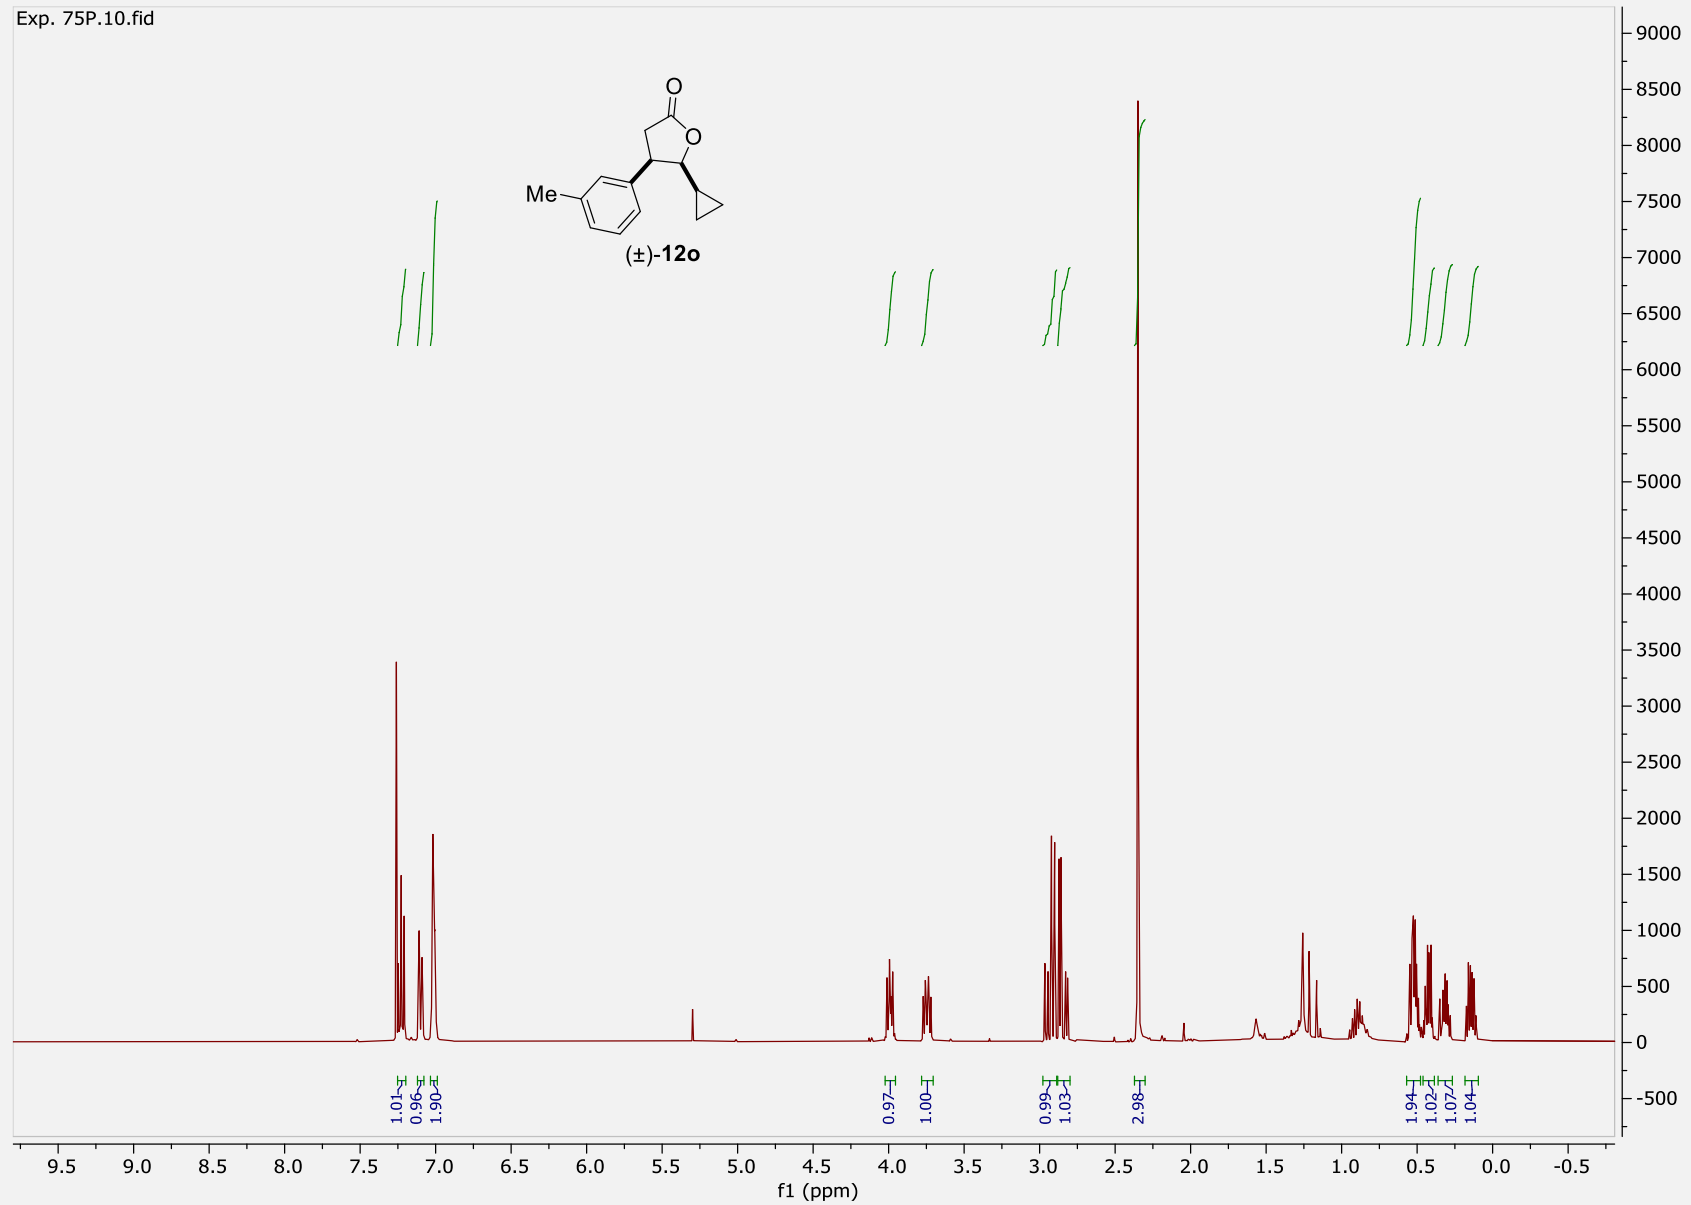

S148

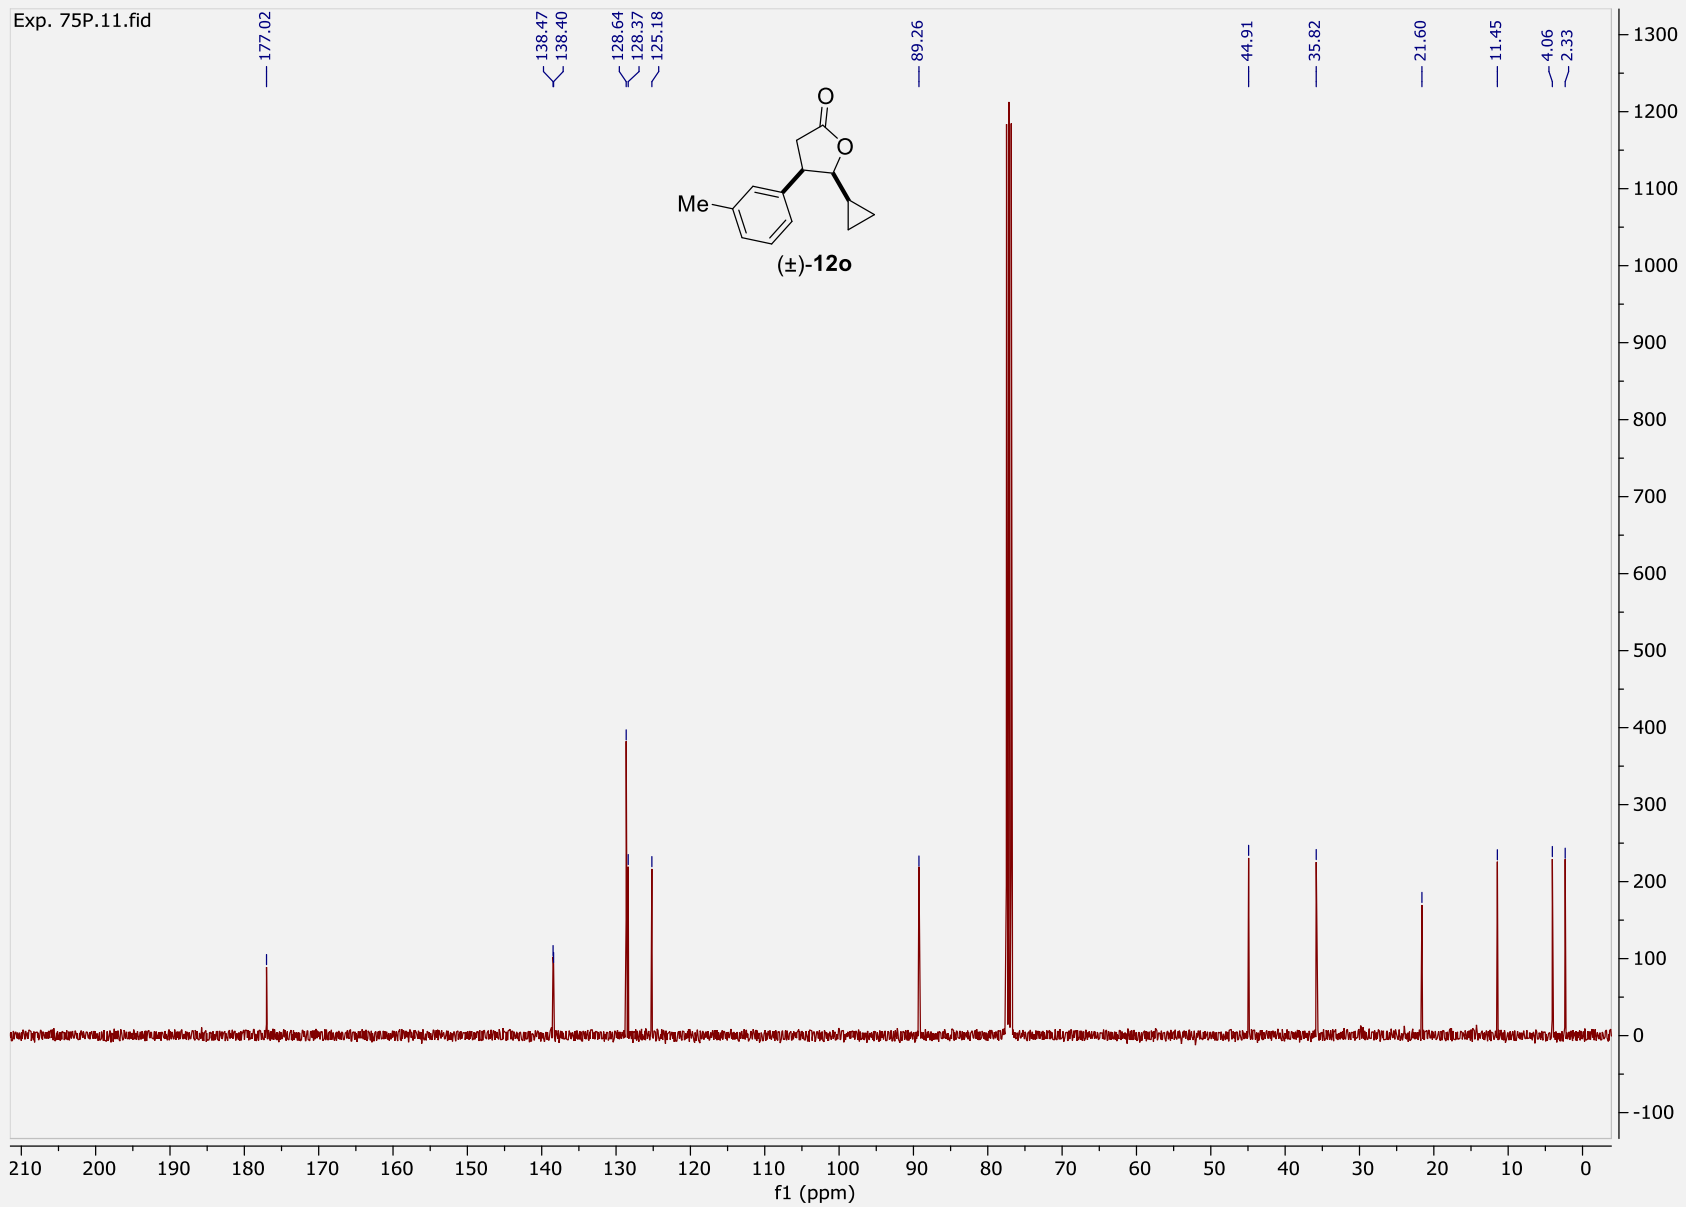

S149

Exp. 76P.10.fid

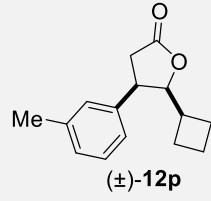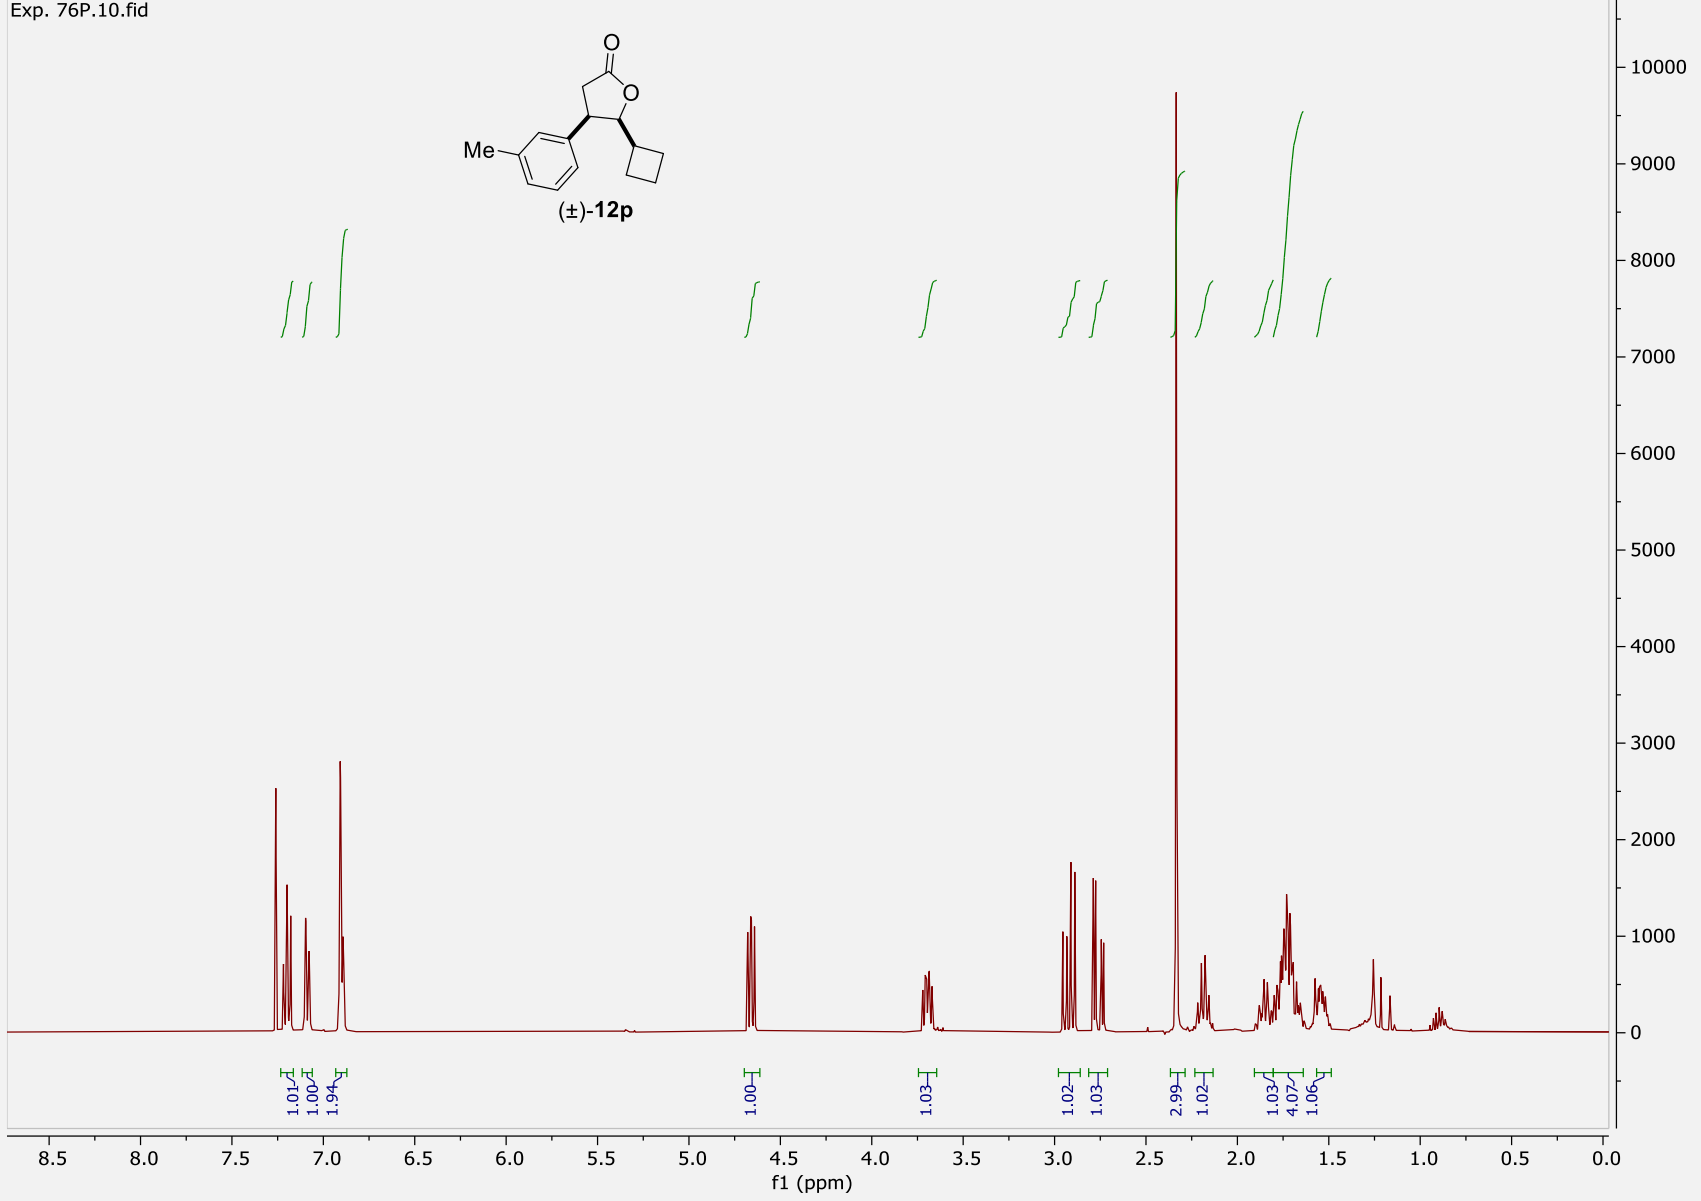

S150

Exp. 76P.11.fid

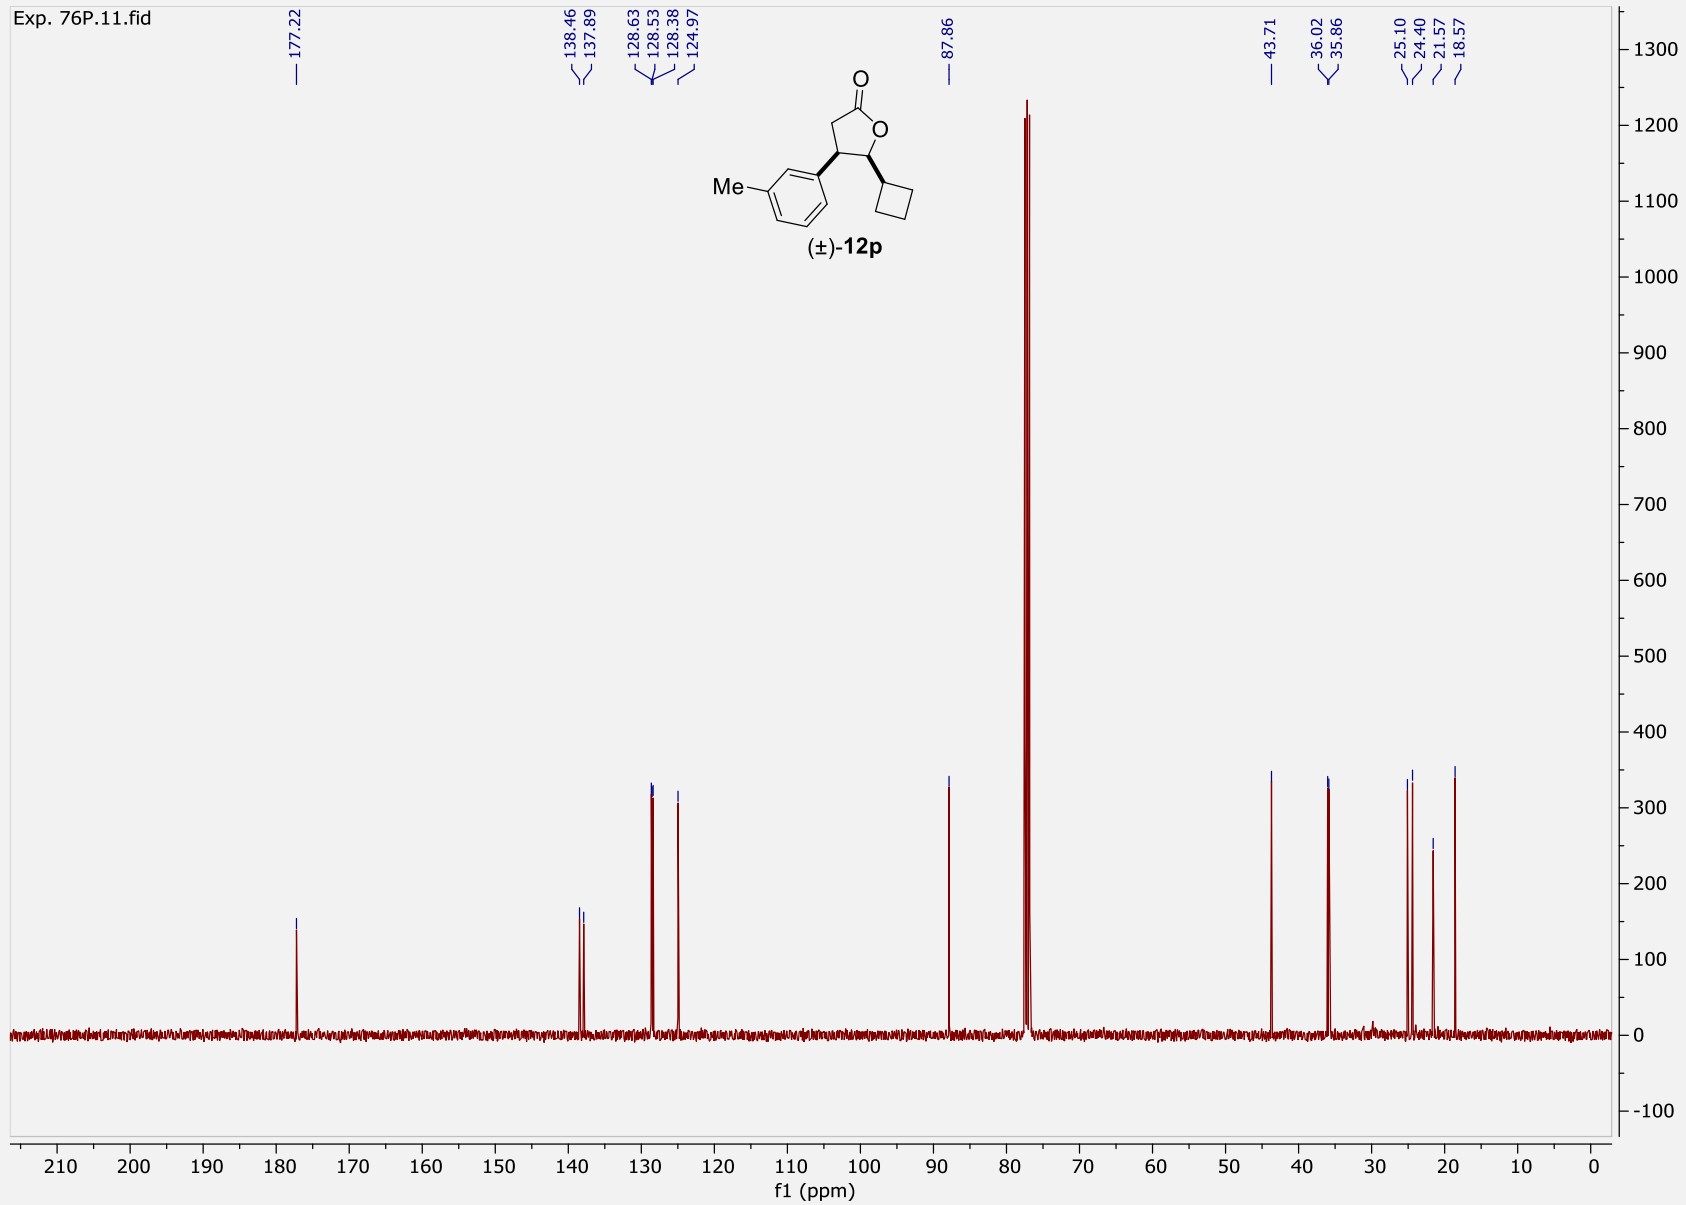

S151

Ep. 77P.12.fid

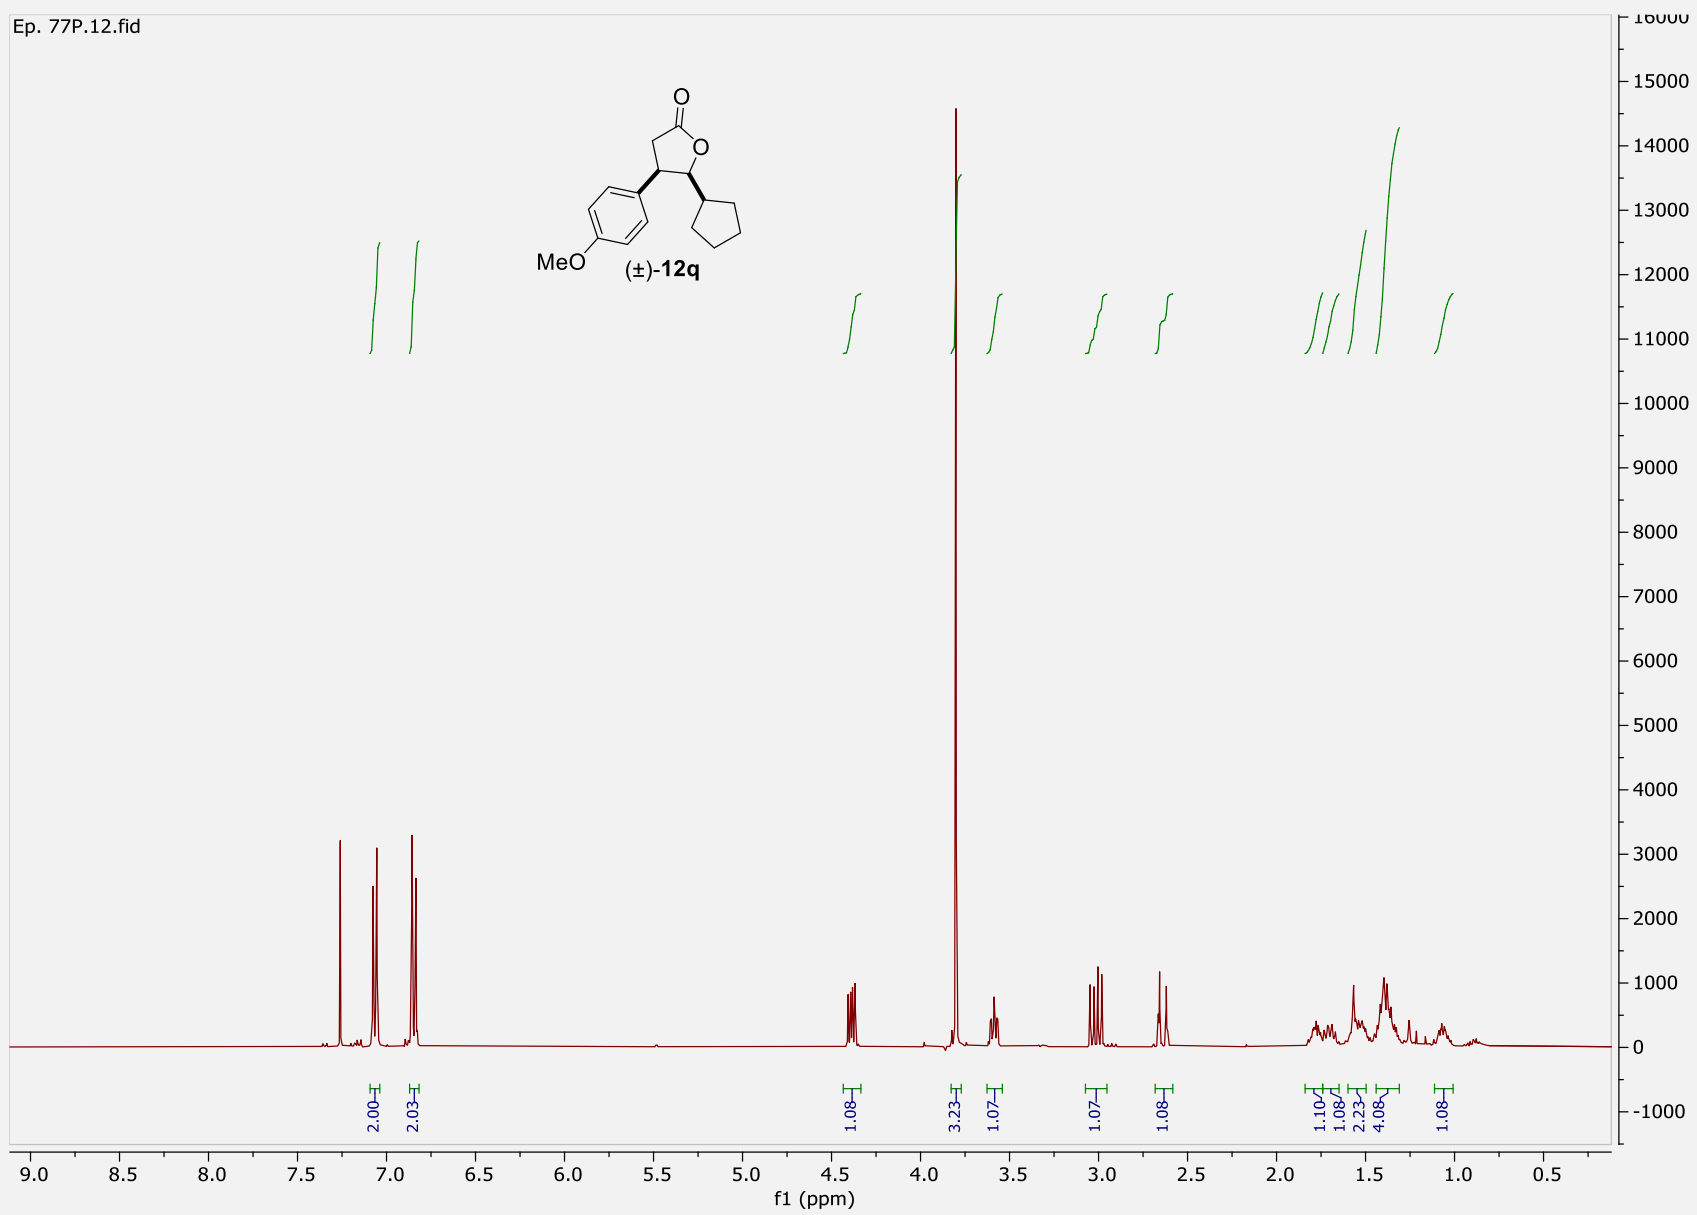

S152



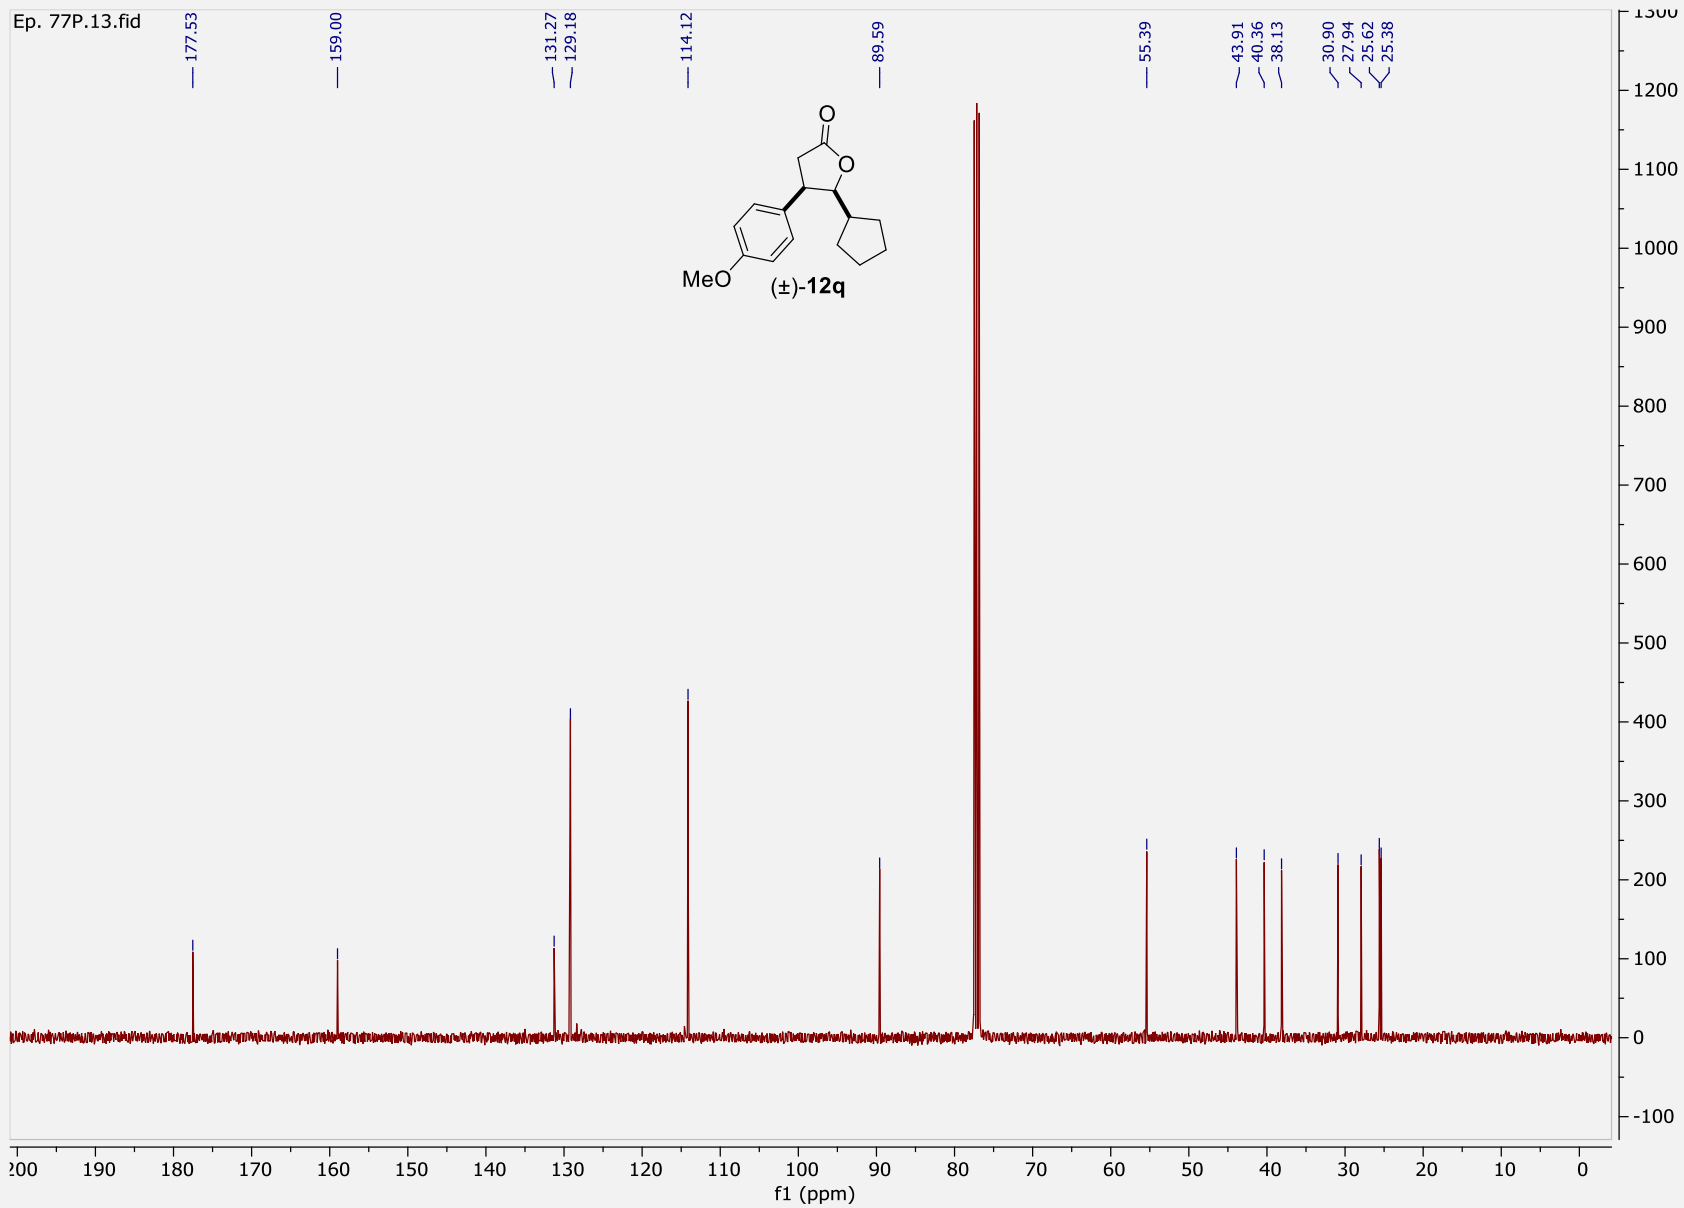

S153

Exp. 78P.12.fid

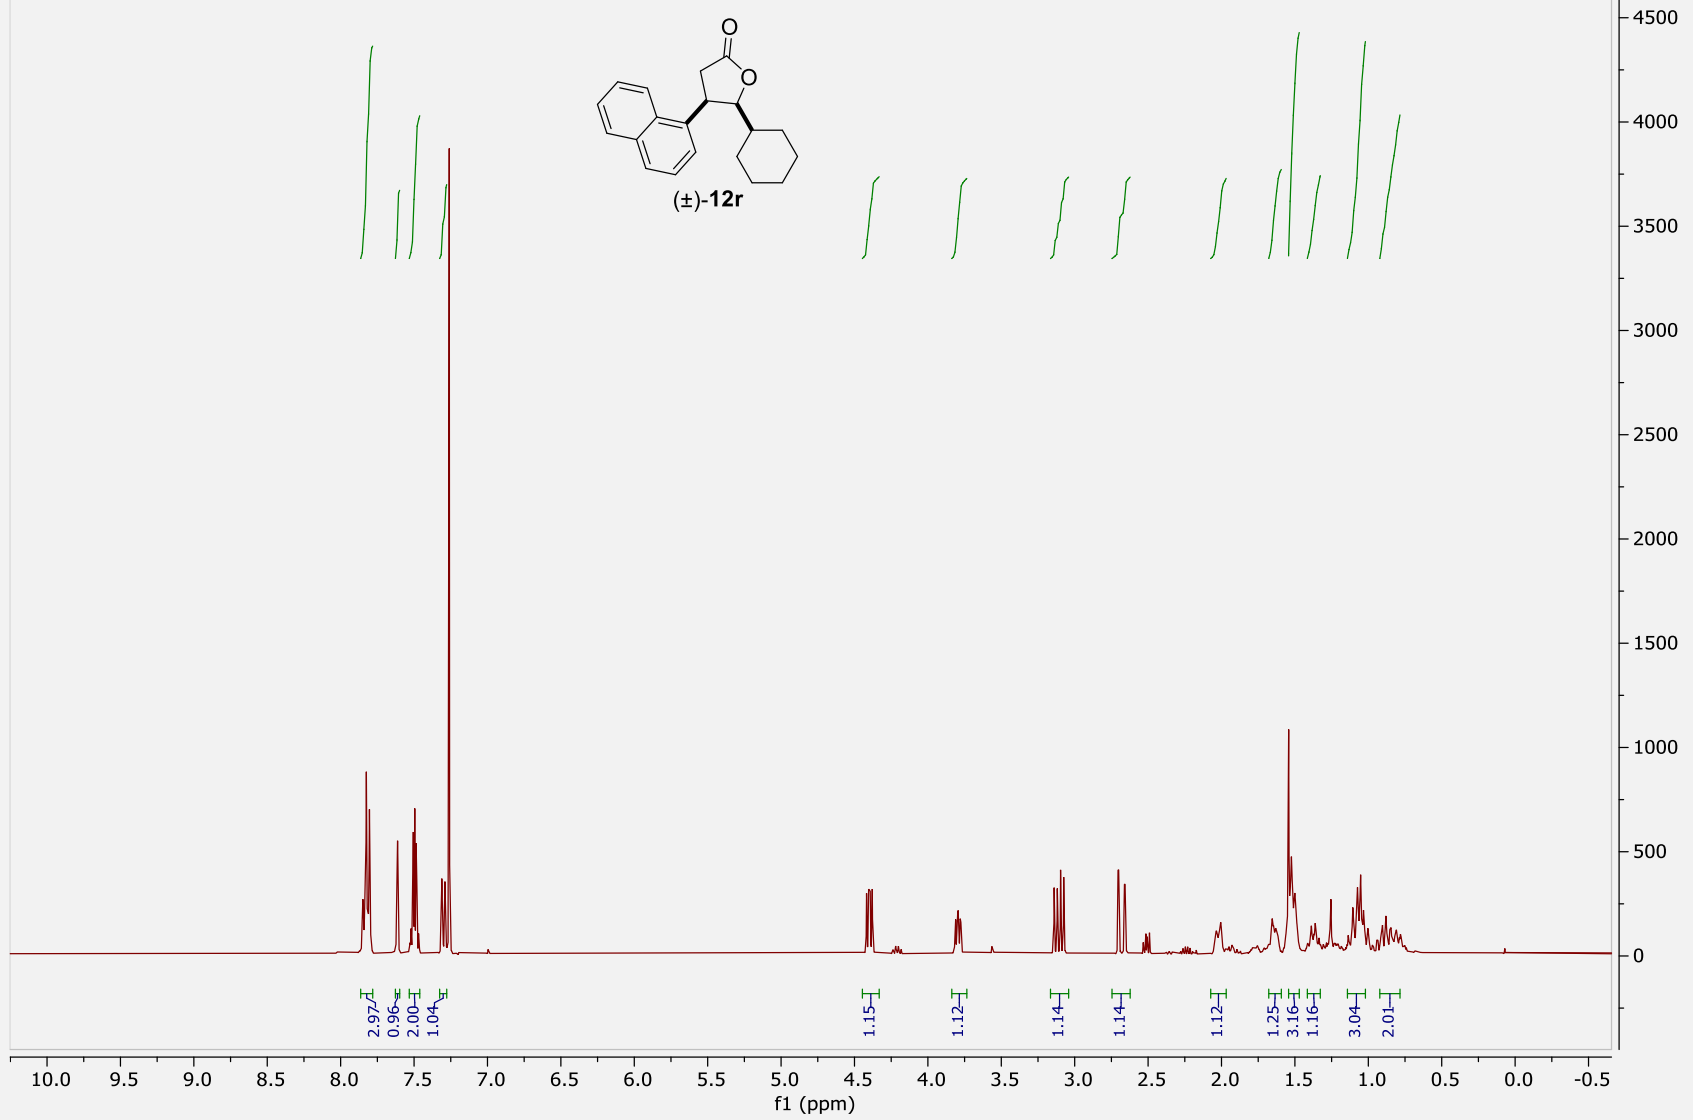

S154

Exp. 78P.13.fid

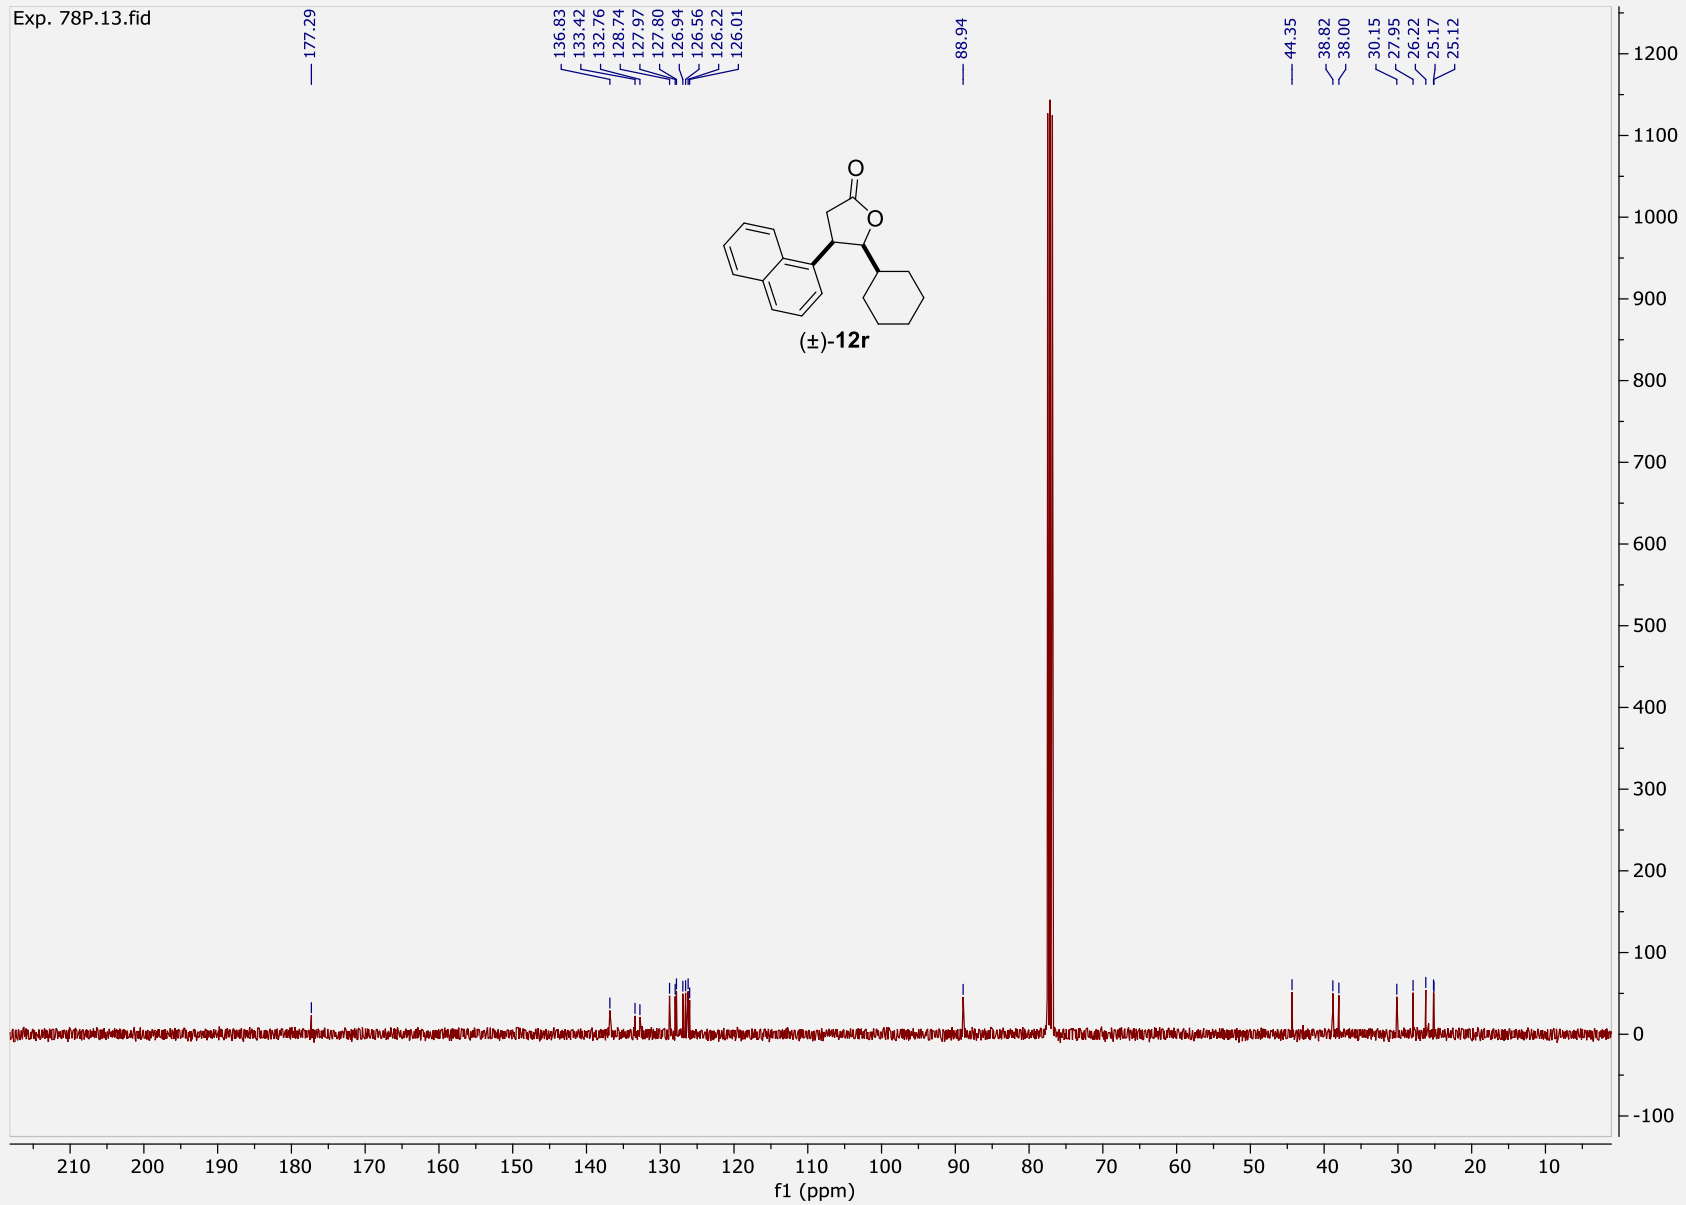

S155

Exp. 82P.12.fid

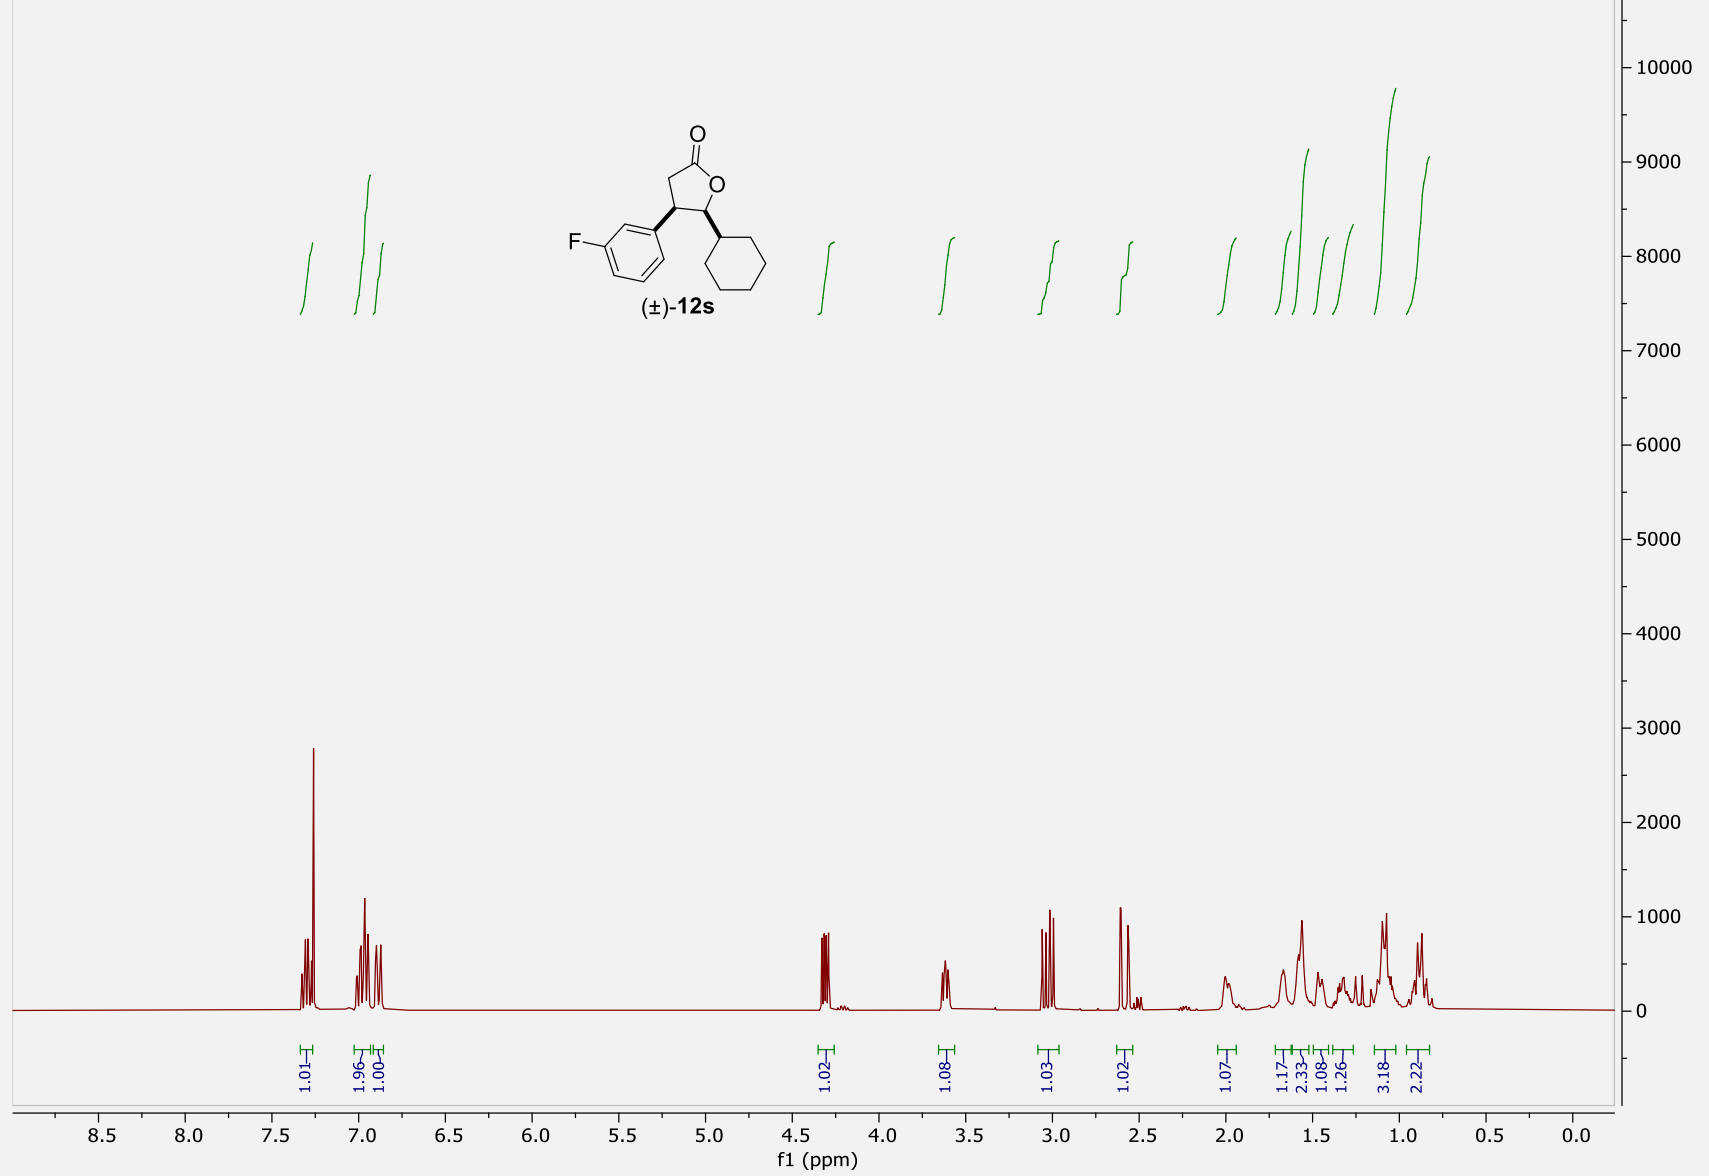

S156

Exp. 82P.13.fid

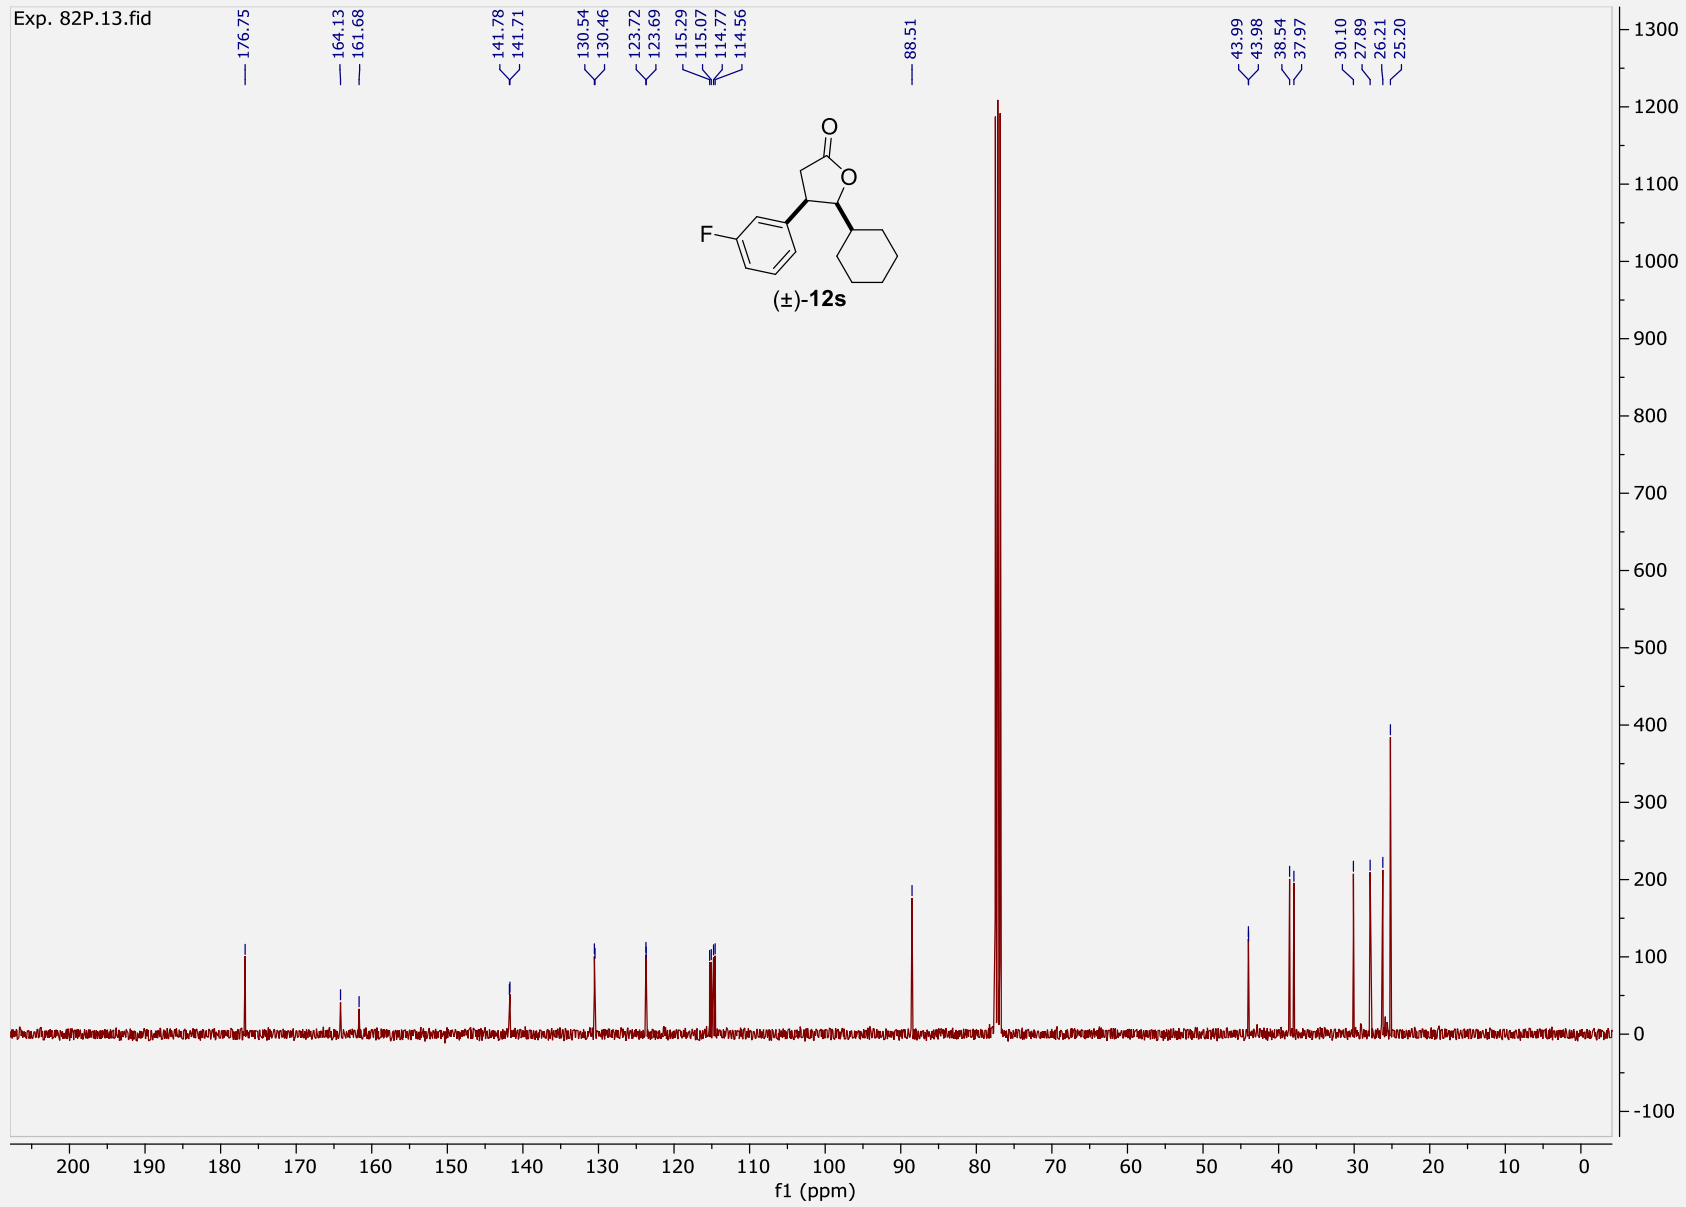

S157

Exp. 82.20.fid  
user Oluwarotimi Ojo  
F19CPD.GLA CDCl3 /u oluajo 55

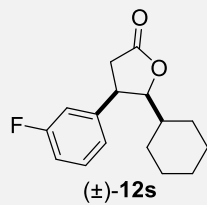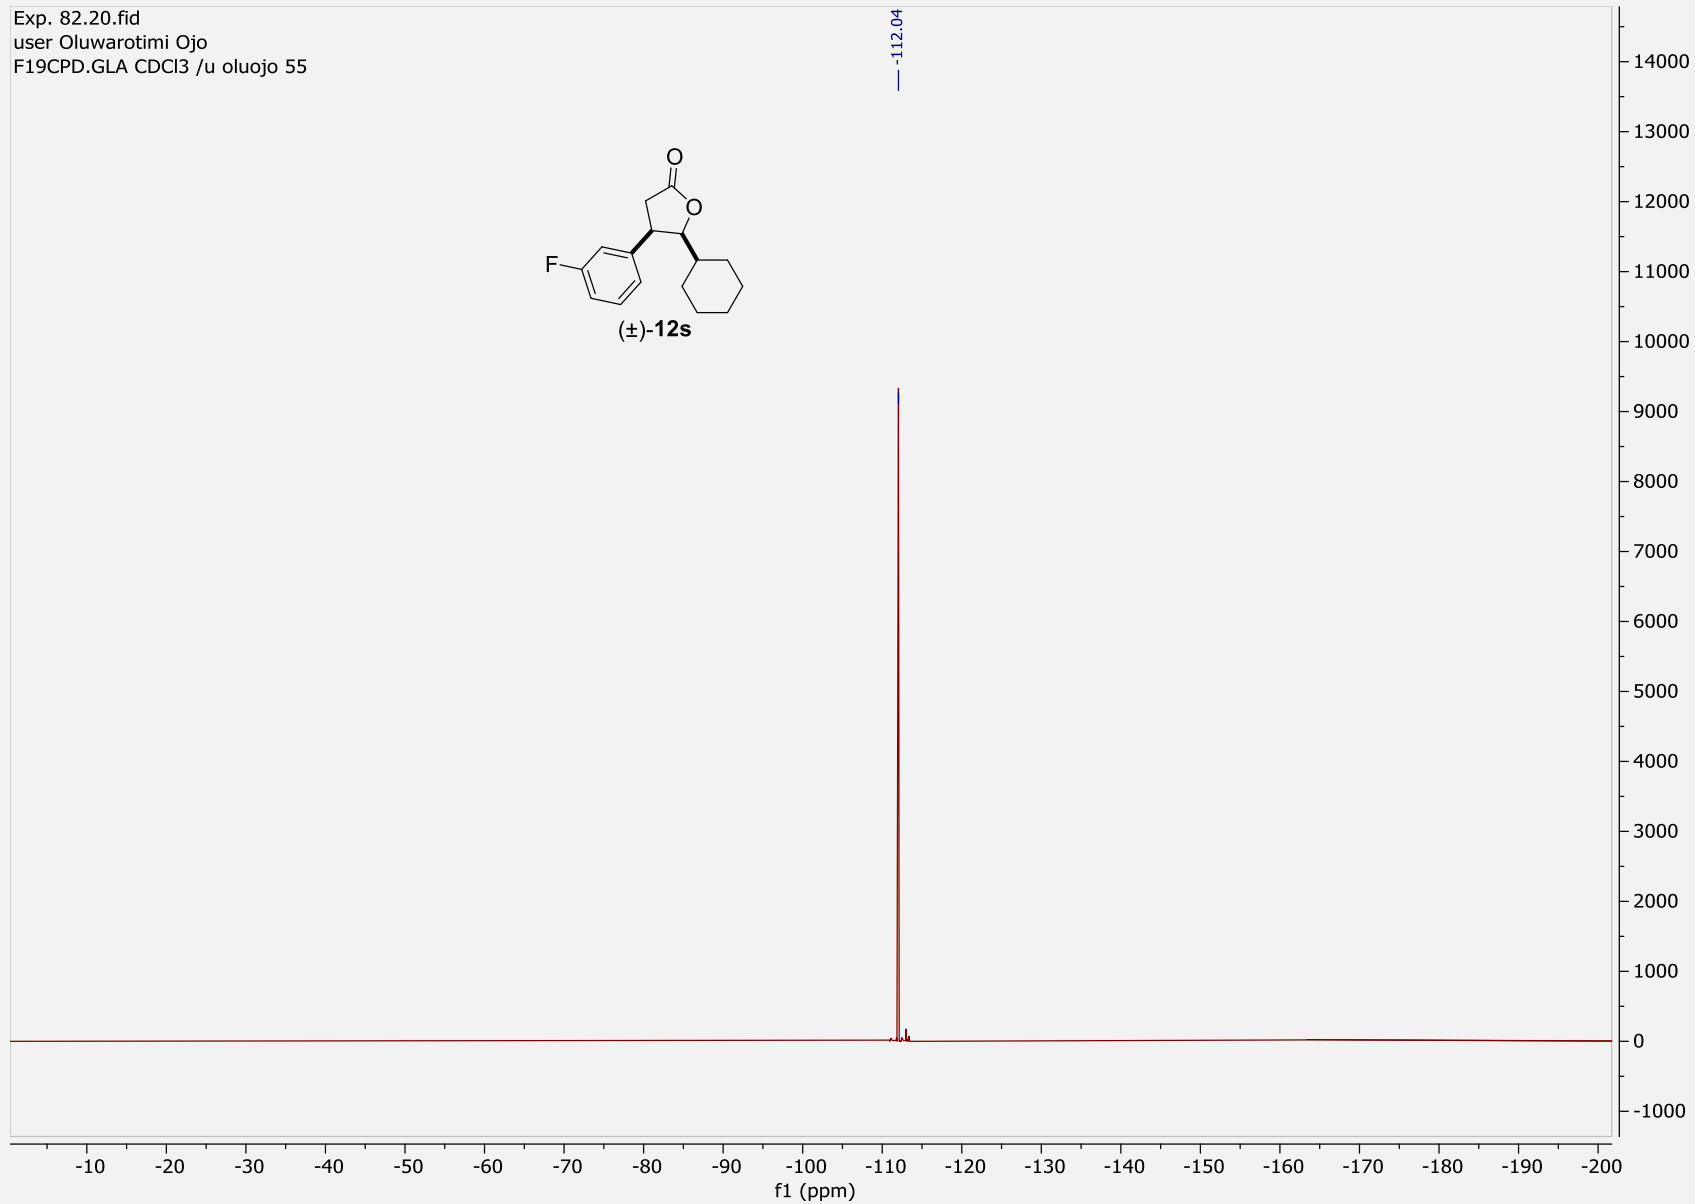

S158

Exp. 79P.12.fid

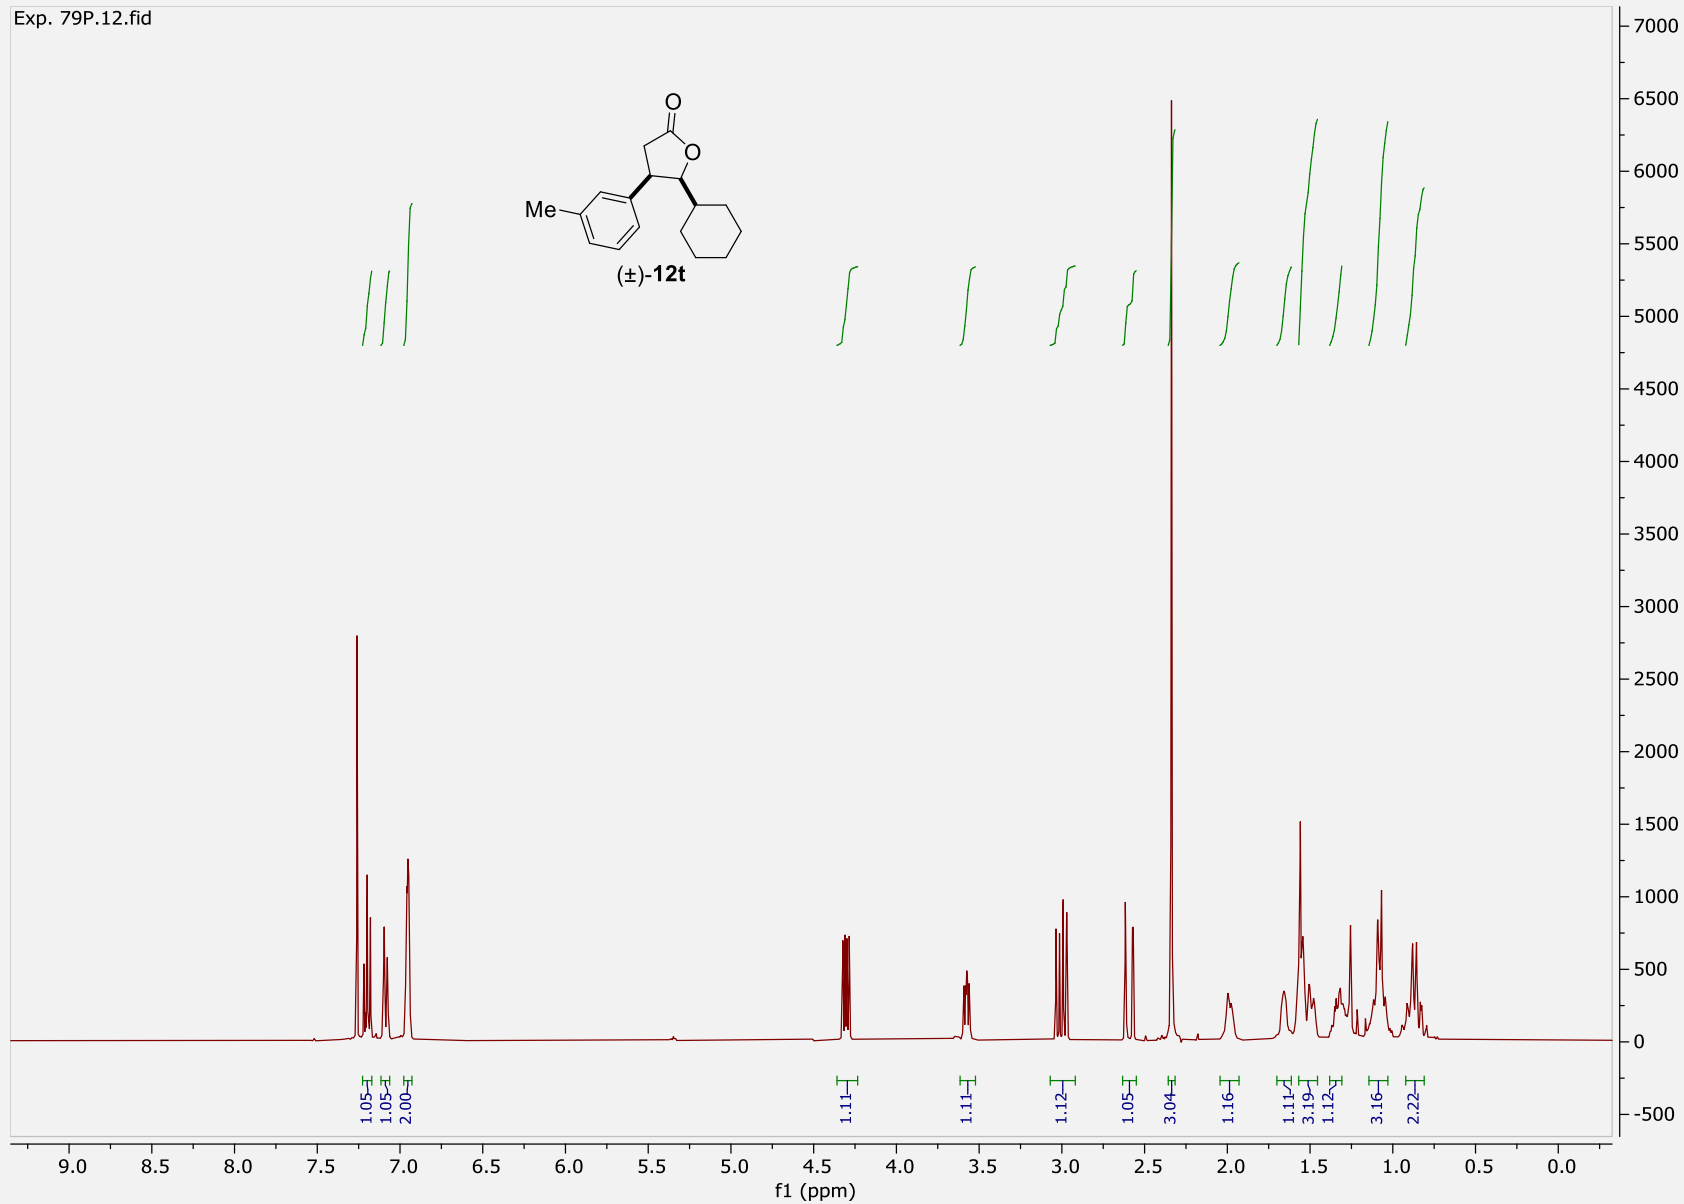

S159

Exp. 79P.13.fid

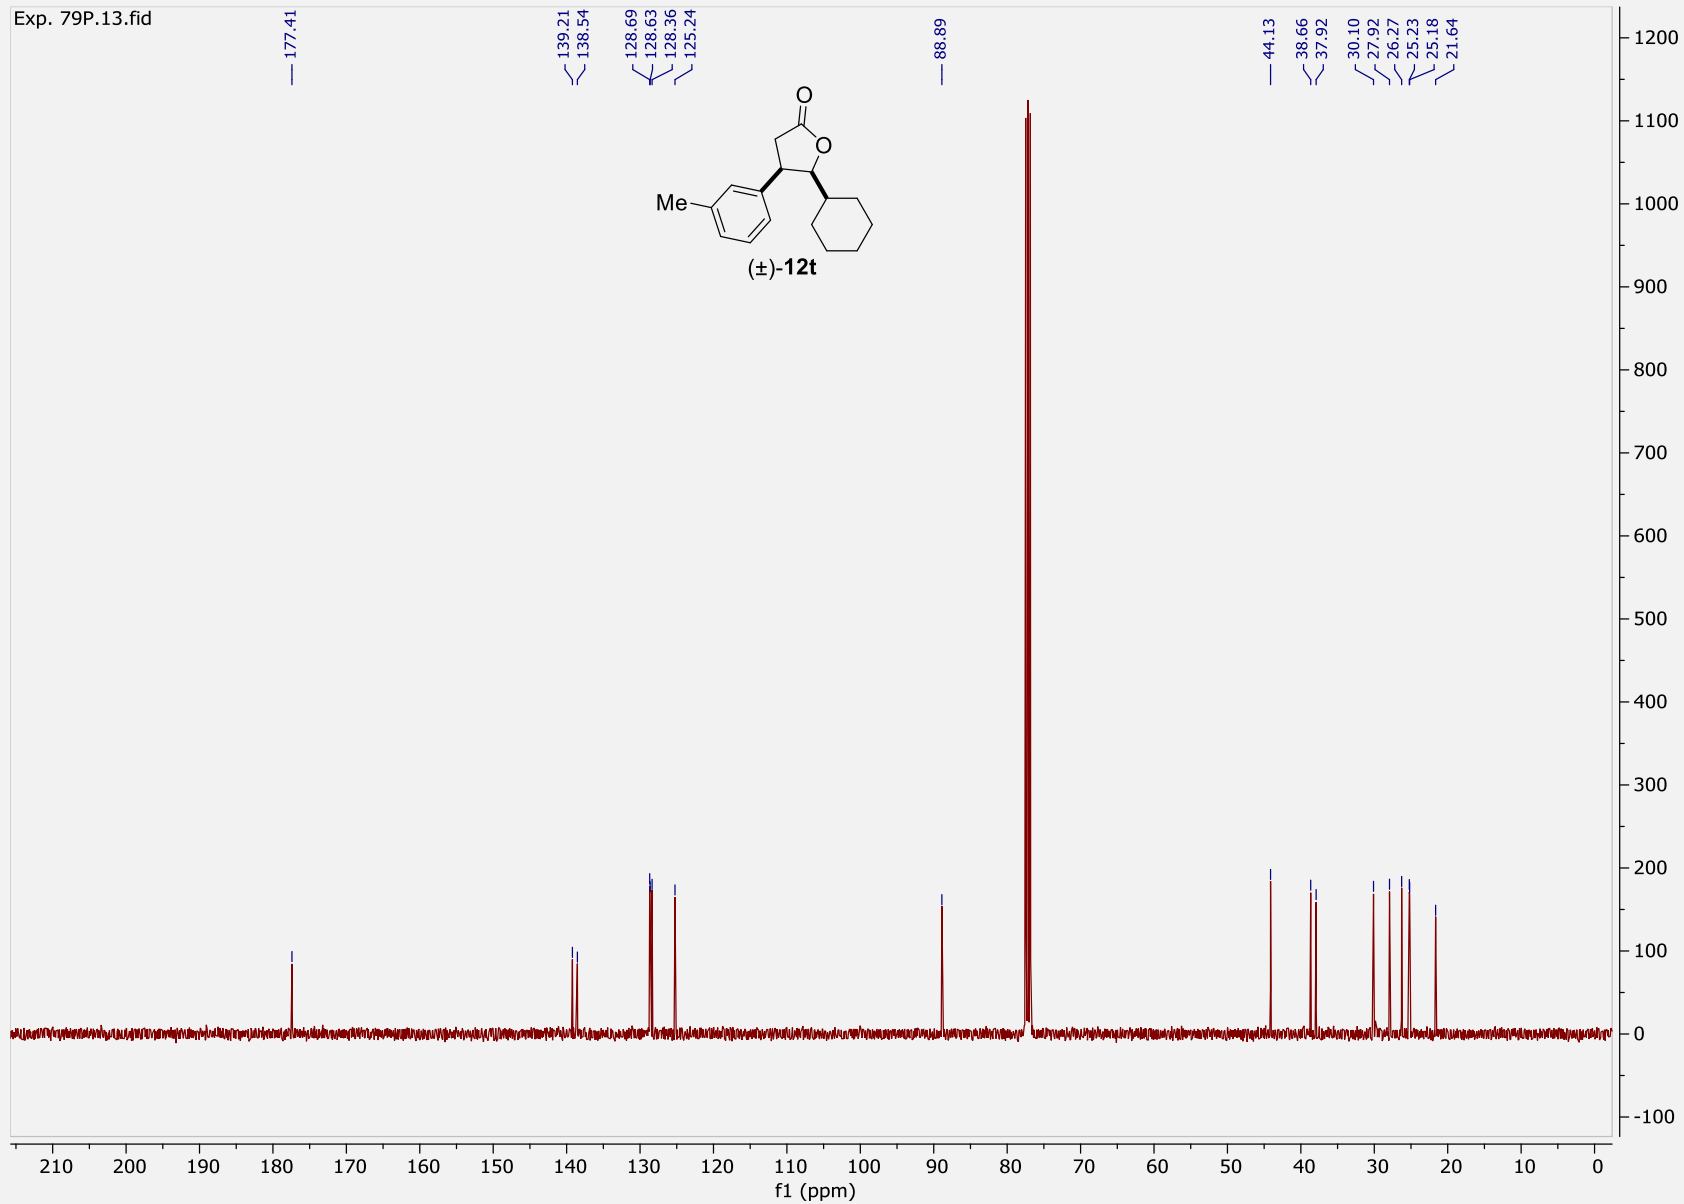

S160



Exp. 80P.11.fid

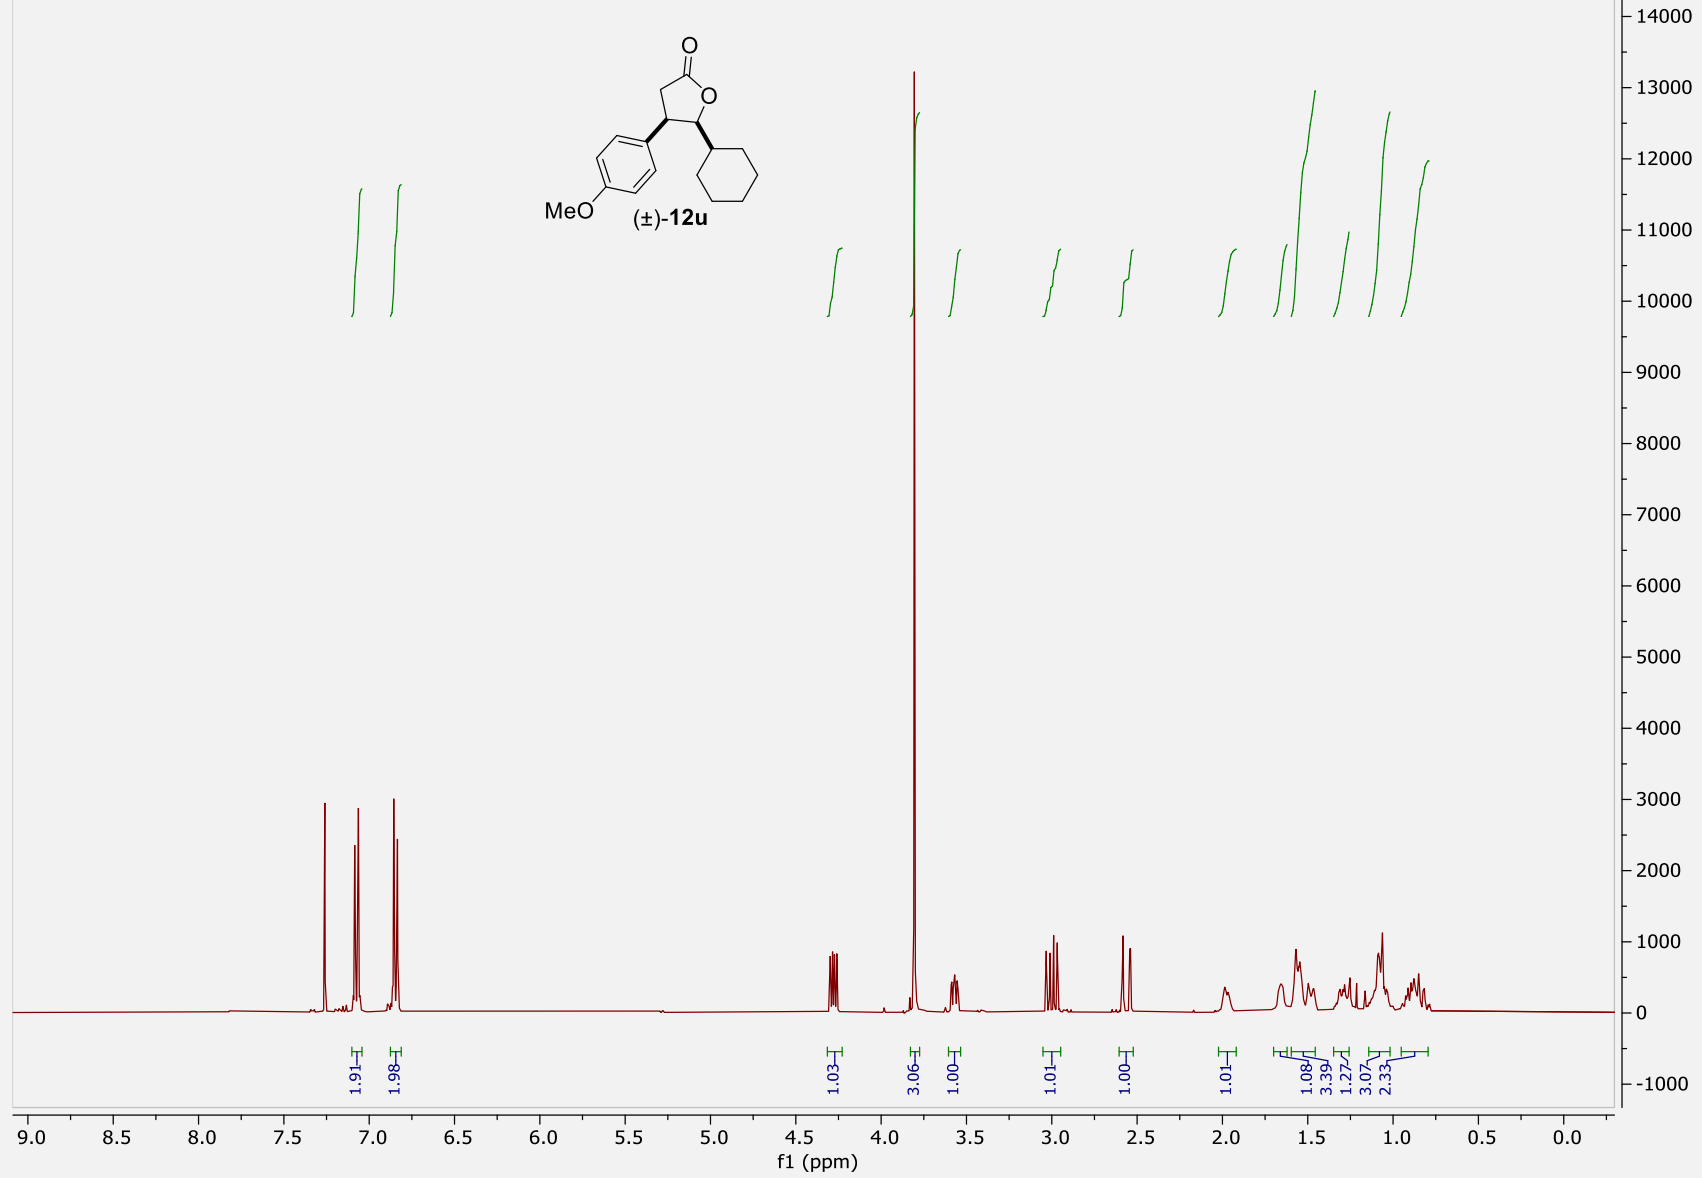

S161

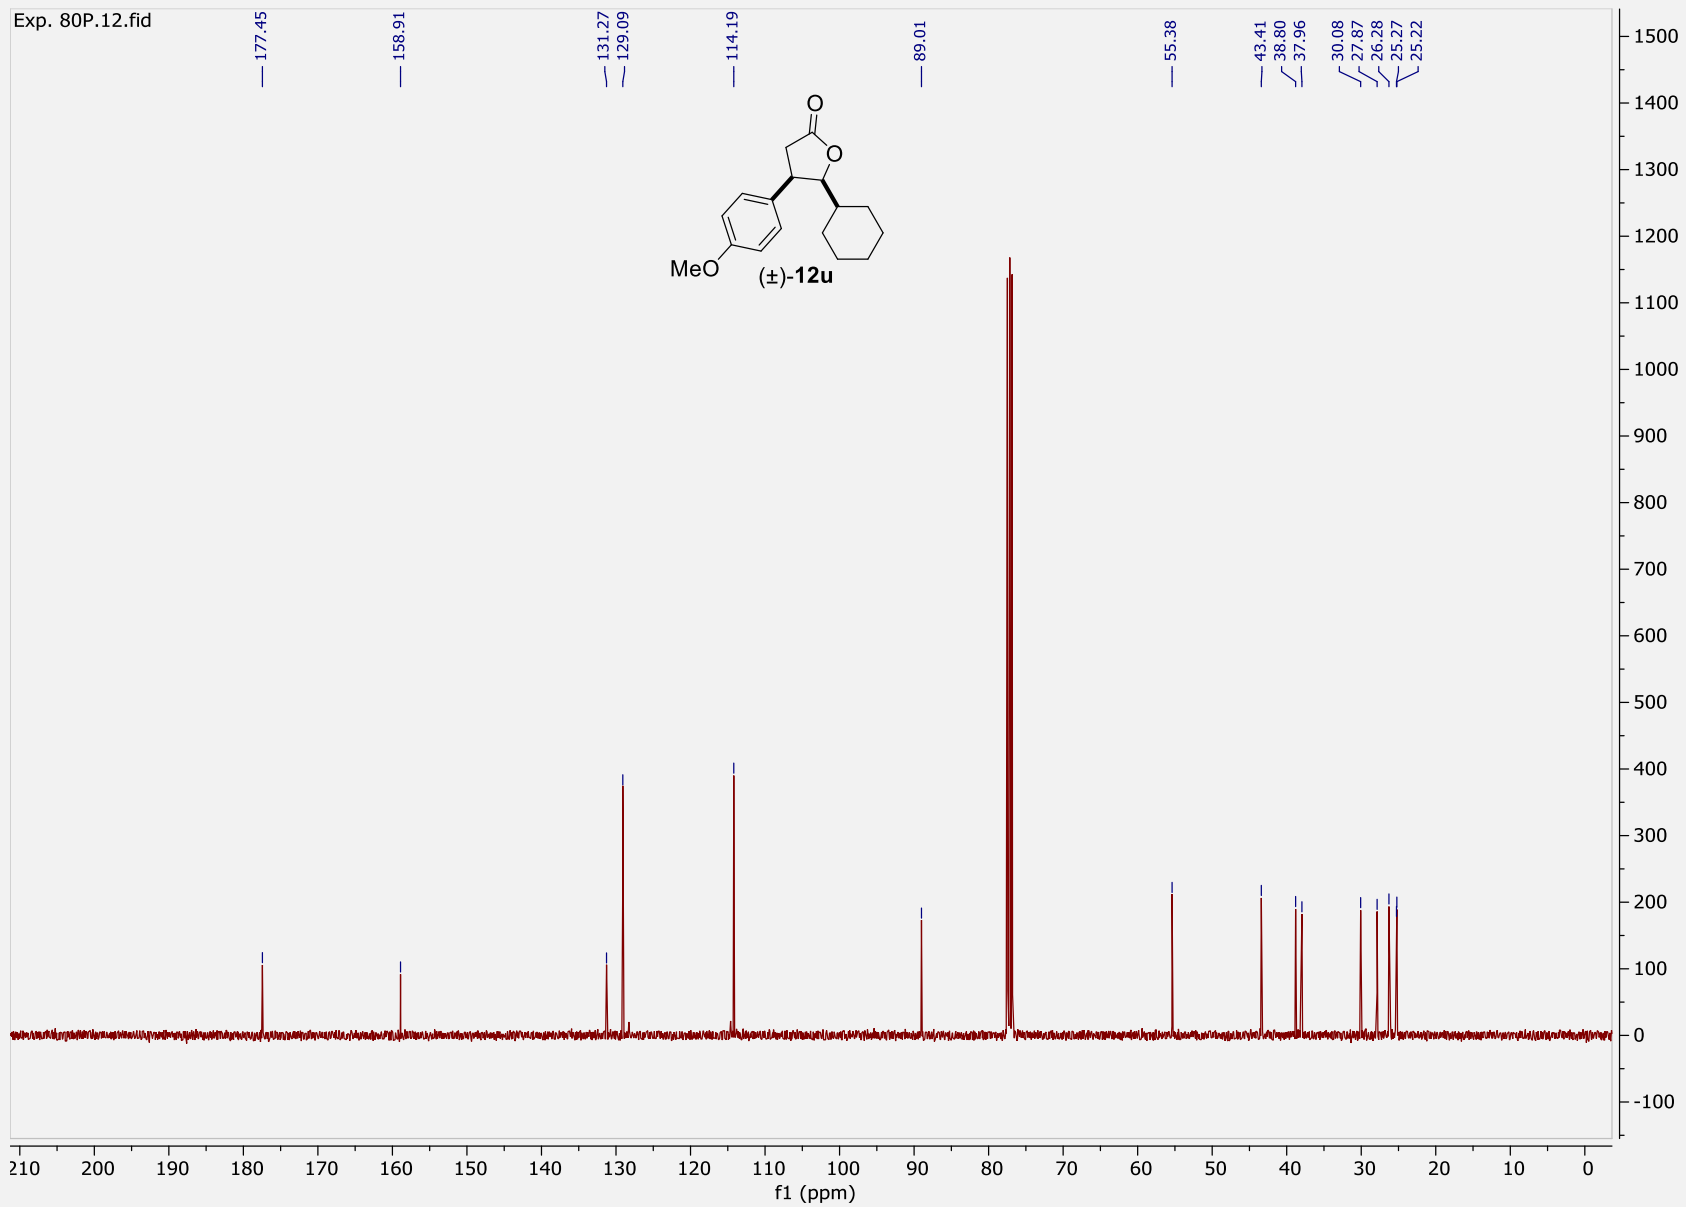

S162

Exp. 81P.10.fid

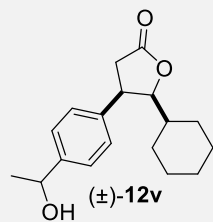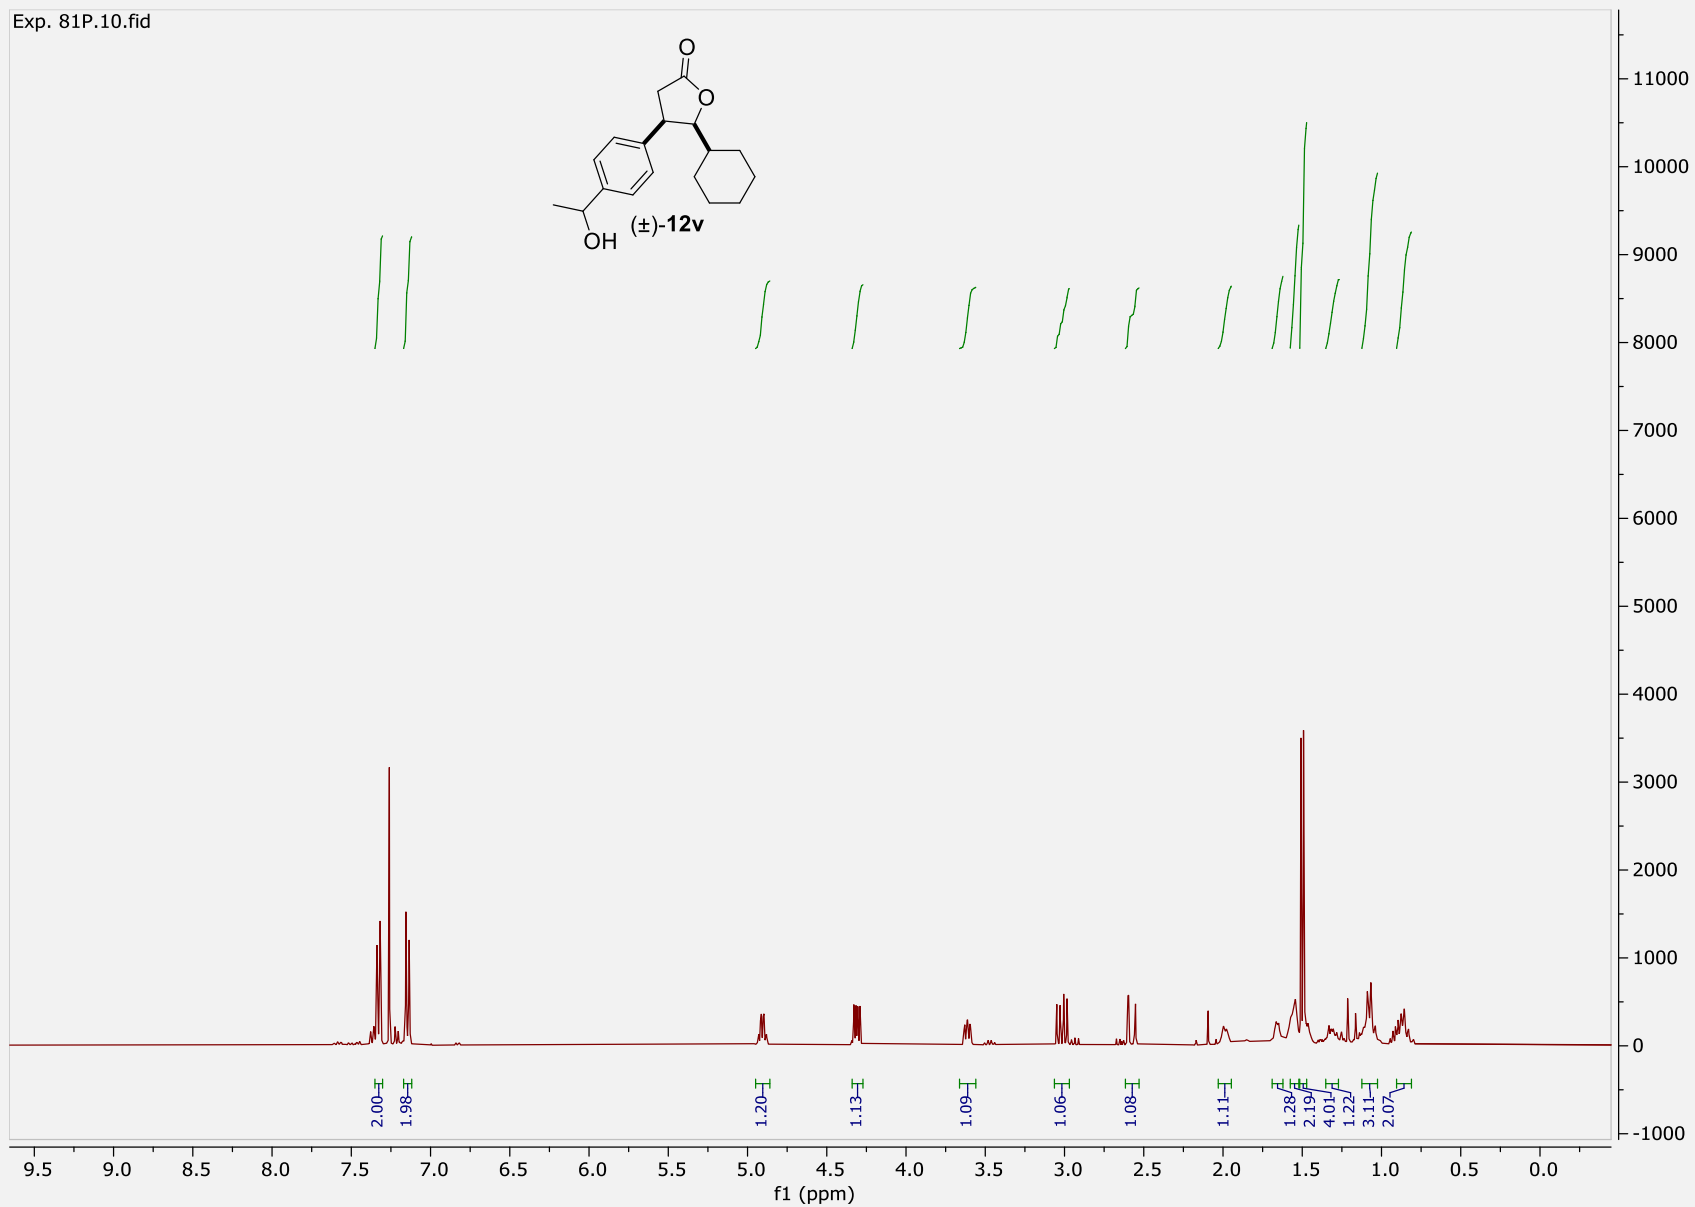

S163

Exp. 81P.11.fid

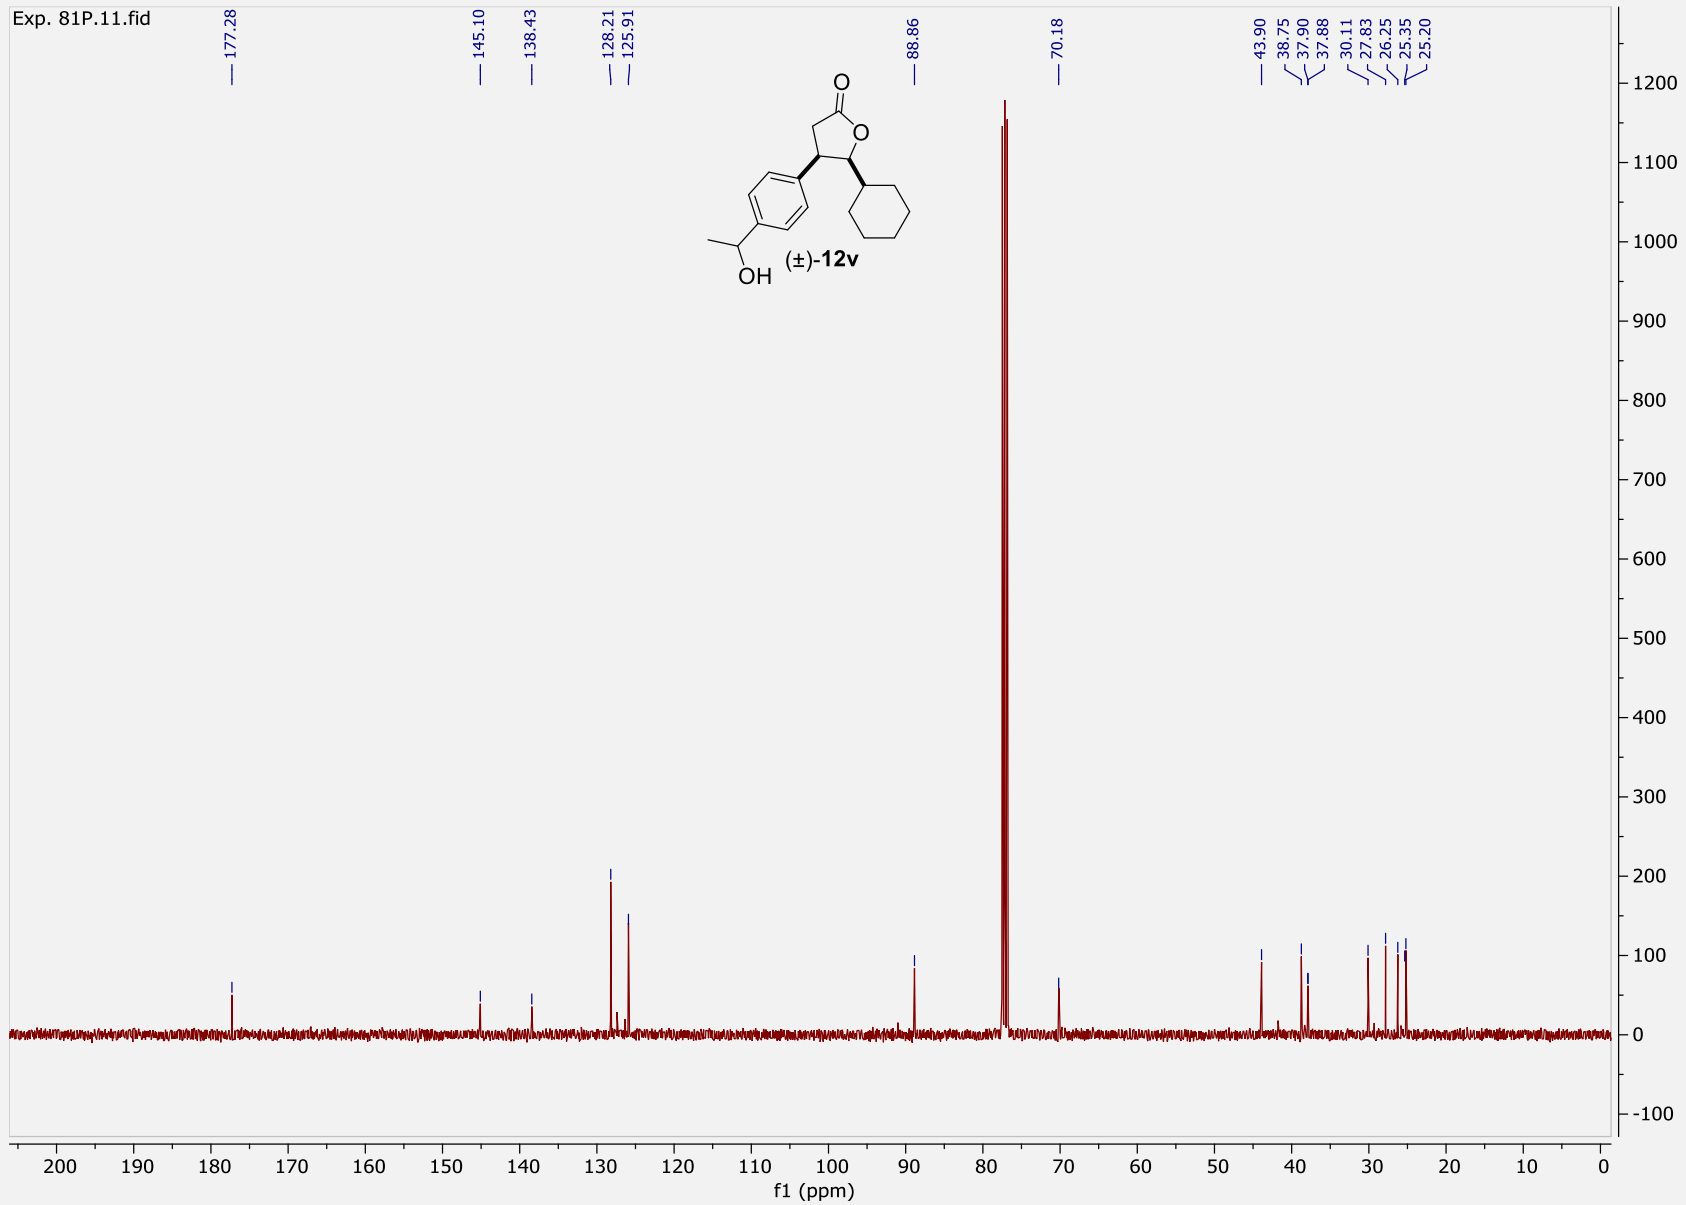

S164
